# Supplementary material for: Fe-catalyzed hydroxytrifluoromethylation of α-(trifluoromethyl)styrenes with CF3SO2Na: facile access to α,β-bistrifluoromethyl tertiary alcohols
Source: Royal Society of Chemistry journal article supplement (doi:10.1039/d2ob02035a), 2022-01-01

# Supporting Information

## **Fe-Catalyzed hydroxytrifluoromethylation of $\alpha$ -(trifluoromethyl)styrenes with $\text{CF}_3\text{SO}_2\text{Na}$ : facile access to $\alpha,\beta$ -bistrifluoromethyl tertiary alcohols**

Pai Zheng,<sup>a,†</sup> Chuan Liu,<sup>a,†</sup> Qianding Zeng,<sup>a</sup> Yi Zhang,<sup>a</sup> Ying Liu,<sup>a</sup> Jingjing He,<sup>a</sup> Yupian Deng<sup>a</sup> and Song Cao<sup>\*a,b</sup>

<sup>a</sup>Shanghai Key Laboratory of Chemical Biology, School of Pharmacy, East China University of Science and Technology (ECUST), Shanghai, 200237, China

<sup>b</sup>Key Laboratory of Organofluorine Chemistry, Shanghai Institute of Organic Chemistry, Chinese Academy of Sciences, Shanghai, 200032, China

<sup>†</sup>These authors have equally contributed to this article.

E-mail: [scao@ecust.edu.cn](mailto:scao@ecust.edu.cn)

### Table of contents

|                                                                                                                                             |            |
|---------------------------------------------------------------------------------------------------------------------------------------------|------------|
| <b>1. General information</b>                                                                                                               | <b>S2</b>  |
| <b>2. <math>\alpha</math>-(Trifluoromethyl)styrenes (1a–x) used in this reaction</b>                                                        | <b>S2</b>  |
| <b>3. General procedure for the synthesis of the target compounds 2a–x</b>                                                                  | <b>S2</b>  |
| <b>4. General procedure for the synthesis of compound 4a</b>                                                                                | <b>S3</b>  |
| <b>5. General procedure for the synthesis of compound 5a</b>                                                                                | <b>S3</b>  |
| <b>6. Control experiments</b>                                                                                                               | <b>S3</b>  |
| <b>7. Analytical data of the target compounds</b>                                                                                           | <b>S4</b>  |
| <b>8. Reference</b>                                                                                                                         | <b>S10</b> |
| <b>9. <math>^1\text{H}</math>, <math>^{13}\text{C}</math>, <math>^{19}\text{F}</math> NMR and HRMS (EI) spectra of the target compounds</b> | <b>S11</b> |

## 1. General information

All reagents were of analytical grade, and obtained from commercial suppliers and used without further purification. Melting points were measured in an open capillary using Büchi melting point B-540 apparatus and are uncorrected.  $^1\text{H}$  NMR and  $^{13}\text{C}$  NMR spectra were recorded on a 400 spectrometer (400 MHz for  $^1\text{H}$  and 100 MHz for  $^{13}\text{C}$ , respectively) using TMS as an internal standard. The  $^{19}\text{F}$  NMR spectra were obtained on a 400 or 600 spectrometer (376 MHz) with  $\text{CF}_3\text{COOH}$  as an internal standard.  $\text{CDCl}_3$  or  $(\text{CD}_3)_2\text{CO}$  was used as the NMR solvents. High resolution mass spectra (HRMS) were acquired in the electron impact mode (EI) using a TOF mass analyzer. The GC and GC-MS were recorded on HP 5973 MSD with 6890 GC. Silica gel (300–400 mesh size) was used for column chromatography. TLC analysis of reaction mixtures was performed using silica gel plates.

## 2. $\alpha$ -(Trifluoromethyl)styrenes (**1a–x**) used in this reaction

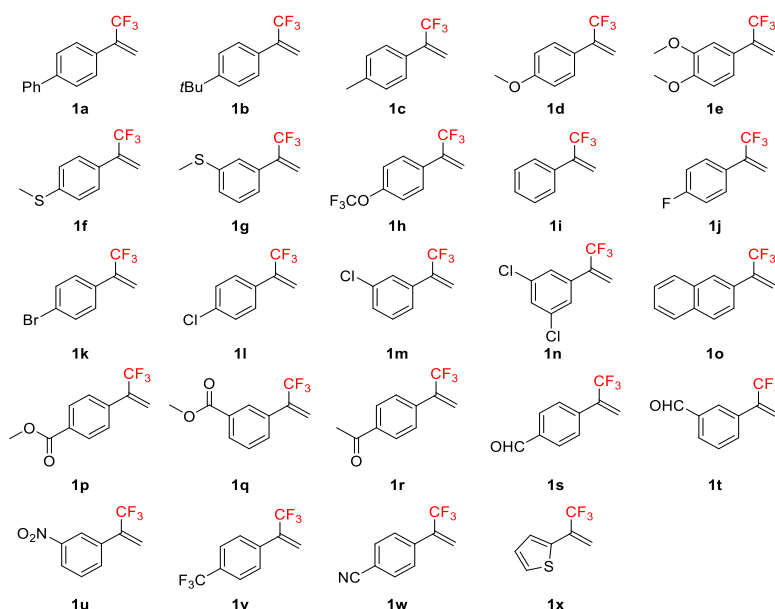

The  $\alpha$ -(trifluoromethyl)styrenes (**1a–x**) were prepared according to the reported procedure.<sup>1</sup>

## 3. General procedure for the synthesis of the target compounds **2a–x**

To a glass tube charged with a stirring bar were added  $\text{Fe}(\text{OAc})_2$  (34.79 mg, 0.20 mmol, 20 mol%),  $\text{K}_2\text{S}_2\text{O}_8$  (54.06 mg, 0.20 mmol, 0.2 equiv),  $\text{NaSO}_2\text{CF}_3$  (312.12 mg, 2.0 mmol, 2.0 equiv),  $\alpha$ -(trifluoromethyl)styrenes **1** (1.0 mmol, 1.0 equiv), and DMSO (5 mL). Then the reaction mixture was stirred at room temperature under air atmosphere for 12 h (monitored by TLC and GC/MS). After completion of the reaction, the reaction mixture was quenched with saturated aqueous solution of NaCl (10 mL) and extracted with dichloromethane ( $3 \times 10$  mL). The organic layer was separated and dried over  $\text{Na}_2\text{SO}_4$ , filtered and concentrated in vacuo. The resultant residue was purified by column chromatography on silica gel using *n*-hexane/dichloromethane (20/1~10/1) as eluent to afford the pure target compounds **2a–x**.

#### 4. General procedure for the synthesis of compound 4a

To a glass tube charged with a stirring bar were added Fe(OAc)<sub>2</sub> (34.79 mg, 0.20 mmol, 20 mol%), K<sub>2</sub>S<sub>2</sub>O<sub>8</sub> (54.06 mg, 0.20 mmol), NaSO<sub>2</sub>CF<sub>3</sub> (312.12 mg, 2.0 mmol), unactivated alkenes **3a–c** (1.0 mmol), and DMSO (5 mL). Then the reaction mixture was stirred at room temperature under air atmosphere for 12 h (monitored by TLC and GC/MS). After completion of the reaction, the reaction mixture was quenched with saturated aqueous solution of NaCl (10 mL) and extracted with dichloromethane (3×10 mL). The organic layer was separated and dried over Na<sub>2</sub>SO<sub>4</sub>, filtered and concentrated in vacuo. The resultant residue was purified by column chromatography on silica gel using *n*-hexane/dichloromethane (10/1) as eluent to afford compound **4a**.

#### 5. General procedure for the synthesis of compound 5a

A solution of **2a** (334.08 mg, 1.0 mmol), Cs<sub>2</sub>CO<sub>3</sub> (651.64 mg, 2.0 mmol) in DMF (5 mL) was stirred at 25 °C for about 30 minutes. Subsequently, iodoethane (187.16 mg, 1.2 mmol) was added to the mixture. Stirring was continued at 25 °C for 4 h (monitored by TLC and GC/MS). After completion of the reaction, the reaction mixture was quenched with saturated aqueous solution of NH<sub>4</sub>Cl (10 mL) and extracted with ethyl acetate (3 × 10 mL). The organic layer was separated and dried over Na<sub>2</sub>SO<sub>4</sub>, filtered and concentrated in vacuo. The resultant residue was purified by column chromatography on silica gel using *n*-hexane/ ethyl acetate (15/1) as eluent to afford **5a**.

#### 6. Control experiments

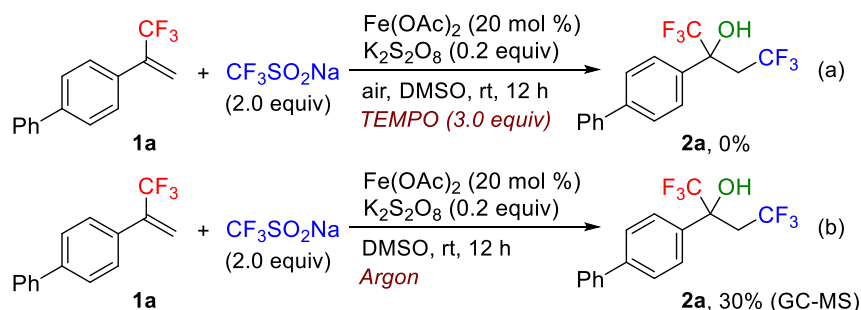

Control experiment (a): To a glass tube charged with a stirring bar were added Fe(OAc)<sub>2</sub> (3.48 mg, 0.02 mmol, 20 mol%), K<sub>2</sub>S<sub>2</sub>O<sub>8</sub> (5.41 mg, 0.02 mmol), NaSO<sub>2</sub>CF<sub>3</sub> (31.21 mg, 0.2 mmol), **1a** (33.41 mg, 0.1 mmol, 1.0 equiv), TEMPO (46.88 mg, 0.3 mmol), and DMSO (1 mL). Then the reaction mixture was stirred at room temperature under air atmosphere for 12 h. Finally, the reaction mixture was analyzed by TLC and GC/MS.

Control experiment (b): To a glass tube charged with a stirring bar were added Fe(OAc)<sub>2</sub> (3.48 mg, 0.02 mmol, 20 mol%), K<sub>2</sub>S<sub>2</sub>O<sub>8</sub> (5.41 mg, 0.02 mmol), NaSO<sub>2</sub>CF<sub>3</sub> (31.21 mg, 0.2 mmol), **1a** (33.41 mg, 0.1 mmol), and DMSO (1 mL). Then the reaction mixture was stirred at room temperature under argon atmosphere for 12 h. Finally, the reaction mixture was analyzed by TLC and GC/MS.

## 7. Analytical data of the target compounds

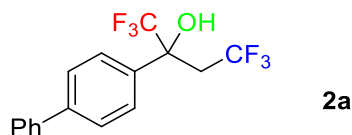

**2-([1,1'-Biphenyl]-4-yl)-1,1,1,4,4,4-hexafluorobutan-2-ol (2a).** white solid; m.p.: 126.3–129.8 °C, yield 95% (317.4 mg);  $^1\text{H}$  NMR (400 MHz,  $\text{CDCl}_3$ )  $\delta$  7.59–7.52 (m, 6H), 7.37 (t,  $J = 7.2$  Hz, 2H), 7.29 (t,  $J = 7.6$  Hz, 1H), 3.09–2.84 (m, 3H);  $^{13}\text{C}$  NMR (100 MHz,  $\text{CDCl}_3$ )  $\delta$  141.0, 139.0, 132.4, 127.8, 126.7, 126.1, 125.4, 123.8 (q,  $^1J_{\text{CF}} = 276.2$  Hz), 123.4 (q,  $^1J_{\text{CF}} = 284.2$  Hz), 73.9 (qd,  $^2J_{\text{CF}} = 29.2$  Hz,  $^3J_{\text{CF}} = 1.8$  Hz), 38.2 (q,  $^2J_{\text{CF}} = 27.9$  Hz);  $^{19}\text{F}$  NMR (376 MHz,  $\text{CDCl}_3$ )  $\delta$  –58.7 (t,  $J = 6.4$  Hz, 3F), –80.6 (s, 3F); HRMS (EI): calcd for  $\text{C}_{16}\text{H}_{12}\text{F}_6\text{O}$   $[\text{M}]^+$ : 334.0792, found: 334.0795.

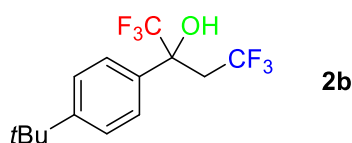

**2-(4-(*tert*-Butyl)phenyl)-1,1,1,4,4,4-hexafluorobutan-2-ol (2b).** colorless oil; yield 93% (292.1 mg);  $^1\text{H}$  NMR (400 MHz,  $\text{CDCl}_3$ )  $\delta$  7.40 (d,  $J = 8.4$  Hz, 2H), 7.35 (d,  $J = 8.8$  Hz, 2H), 3.04–2.81 (m, 2H), 2.79 (s, 1H), 1.25 (s, 9H);  $^{13}\text{C}$  NMR (100 MHz,  $\text{CDCl}_3$ )  $\delta$  151.2, 130.5, 124.6, 124.4, 123.8 (q,  $^1J_{\text{CF}} = 276.1$  Hz), 123.5 (q,  $^1J_{\text{CF}} = 284.4$  Hz), 73.9 (qd,  $^2J_{\text{CF}} = 29.4$  Hz,  $^3J_{\text{CF}} = 2.2$  Hz), 38.2 (q,  $^2J_{\text{CF}} = 27.6$  Hz), 33.6, 30.2;  $^{19}\text{F}$  NMR (376 MHz,  $\text{CDCl}_3$ )  $\delta$  –58.8 (t,  $J = 7.1$  Hz, 3F), –80.6 (s, 3F); HRMS (EI): calcd for  $\text{C}_{14}\text{H}_{16}\text{F}_6\text{O}$   $[\text{M}]^+$ : 314.1105, found: 314.1103.

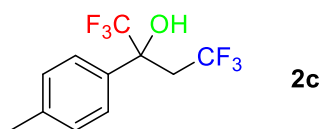

**1,1,1,4,4,4-Hexafluoro-2-(*p*-tolyl)butan-2-ol (2c).** yellow oil; yield 86% (234.0 mg);  $^1\text{H}$  NMR (400 MHz,  $\text{CDCl}_3$ )  $\delta$  7.35 (d,  $J = 8.0$  Hz, 2H), 7.13 (d,  $J = 8.0$  Hz, 2H), 3.00–2.80 (m, 3H), 2.27 (s, 3H);  $^{13}\text{C}$  NMR (100 MHz,  $\text{CDCl}_3$ )  $\delta$  138.2, 130.6, 128.2, 124.8, 123.8 (q,  $^1J_{\text{CF}} = 276.2$  Hz), 123.5 (q,  $^1J_{\text{CF}} = 284.4$  Hz), 73.9 (qd,  $^2J_{\text{CF}} = 29.2$  Hz,  $^3J_{\text{CF}} = 2.0$  Hz), 38.1 (q,  $^2J_{\text{CF}} = 27.5$  Hz), 20.0;  $^{19}\text{F}$  NMR (376 MHz,  $\text{CDCl}_3$ )  $\delta$  –58.8 (s, 3F), –80.9 (s, 3F); HRMS (EI): calcd for  $\text{C}_{11}\text{H}_{10}\text{F}_6\text{O}$   $[\text{M}]^+$ : 272.0636, found: 272.0638.

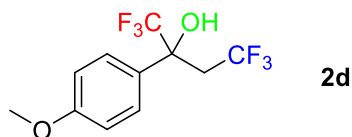

**1,1,1,4,4,4-Hexafluoro-2-(4-methoxyphenyl)butan-2-ol (2d).** yellow oil; yield 88% (253.5 mg);  $^1\text{H}$  NMR (400 MHz,  $\text{CDCl}_3$ )  $\delta$  7.40 (d,  $J = 8.4$  Hz, 2H), 6.86 (d,  $J = 8.8$  Hz, 2H), 3.73 (s, 3H), 3.02–2.80 (m, 3H);  $^{13}\text{C}$  NMR (100 MHz,  $\text{CDCl}_3$ )  $\delta$  159.1, 126.3, 125.4, 123.8 (q,  $^1J_{\text{CF}} = 276.1$  Hz), 123.5 (q,  $^1J_{\text{CF}} = 284.3$  Hz), 112.8, 73.8 (qd,  $^2J_{\text{CF}} = 29.2$  Hz,  $^3J_{\text{CF}} = 2.0$  Hz), 54.3, 38.1 (q,  $^2J_{\text{CF}} = 27.8$  Hz);  $^{19}\text{F}$  NMR (376 MHz,  $\text{CDCl}_3$ )  $\delta$  –58.8 (s, 3F), –81.1 (s, 3F); HRMS (EI): calcd for  $\text{C}_{11}\text{H}_{10}\text{F}_6\text{O}_2$   $[\text{M}]^+$ : 288.0585, found: 288.0581.

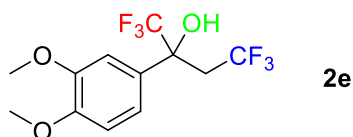

**2-(3,4-Dimethoxyphenyl)-1,1,1,4,4,4-hexafluorobutan-2-ol (2e).** white solid; m.p.: 126.8–131.2 °C, yield 91% (298.5 mg);  $^1\text{H}$  NMR (400 MHz,  $\text{CDCl}_3$ )  $\delta$  7.04 (s, 1H), 7.00 (d,  $J = 8.4$  Hz, 1H), 6.82 (d,  $J = 8.4$  Hz, 1H), 3.83 (s, 3H), 3.83 (s, 3H), 3.03–2.80 (m, 3H);  $^{13}\text{C}$  NMR (100 MHz,  $\text{CDCl}_3$ )  $\delta$  148.6, 147.8, 125.8, 123.8 (q,  $^1J_{\text{CF}} = 276.3$  Hz), 123.5 (q,  $^1J_{\text{CF}} = 283.6$  Hz), 117.7, 109.7, 108.5, 73.7 (qd,  $^2J_{\text{CF}} = 29.1$  Hz,  $^3J_{\text{CF}} = 2.1$  Hz), 55.0, 54.8, 38.2 (q,  $^2J_{\text{CF}} = 27.6$  Hz);  $^{19}\text{F}$  NMR (376 MHz,  $\text{CDCl}_3$ )  $\delta$  -58.8 (t,  $J = 7.1$  Hz, 3F), -80.8 (s, 3F); HRMS (EI): calcd for  $\text{C}_{12}\text{H}_{12}\text{F}_6\text{O}_3$   $[\text{M}]^+$ : 318.0691, found: 318.0694.

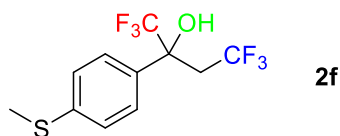

**1,1,1,4,4,4-Hexafluoro-2-(4-(methylthio)phenyl)butan-2-ol (2f).** colorless oil; yield 90% (273.6 mg);  $^1\text{H}$  NMR (400 MHz,  $\text{CDCl}_3$ )  $\delta$  7.39 (d,  $J = 8.0$  Hz, 2H), 7.20 (d,  $J = 8.8$  Hz, 2H), 3.00–2.82 (m, 3H), 2.42 (s, 3H);  $^{13}\text{C}$  NMR (100 MHz,  $\text{CDCl}_3$ )  $\delta$  139.4, 129.9, 125.4, 124.9, 123.8 (q,  $^1J_{\text{CF}} = 276.5$  Hz), 123.3 (q,  $^1J_{\text{CF}} = 284.6$  Hz), 73.8 (qd,  $^2J_{\text{CF}} = 29.4$  Hz,  $^3J_{\text{CF}} = 2.2$  Hz), 38.0 (q,  $^2J_{\text{CF}} = 27.9$  Hz), 14.2;  $^{19}\text{F}$  NMR (376 MHz,  $\text{CDCl}_3$ )  $\delta$  -58.7 (s, 3F), -80.9 (s, 3F); HRMS (EI): calcd for  $\text{C}_{11}\text{H}_{10}\text{F}_6\text{OS}$   $[\text{M}]^+$ : 304.0357, found: 304.0359.

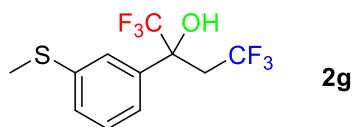

**1,1,1,4,4,4-Hexafluoro-2-(3-(methylthio)phenyl)butan-2-ol (2g).** colorless oil; yield 92% (279.7 mg);  $^1\text{H}$  NMR (400 MHz,  $\text{CDCl}_3$ )  $\delta$  7.42 (s, 1H), 7.27–7.20 (m, 3H), 3.03–2.81 (m, 3H), 2.43 (s, 3H);  $^{13}\text{C}$  NMR (100 MHz,  $\text{CDCl}_3$ )  $\delta$  138.4, 134.3, 127.9, 126.2, 123.7 (q,  $^1J_{\text{CF}} = 276.4$  Hz), 123.3 (q,  $^1J_{\text{CF}} = 285.1$  Hz), 123.2, 121.6, 73.8 (qd,  $^2J_{\text{CF}} = 29.1$  Hz,  $^3J_{\text{CF}} = 2.2$  Hz), 38.3 (q,  $^2J_{\text{CF}} = 27.7$  Hz), 14.8;  $^{19}\text{F}$  NMR (376 MHz,  $\text{CDCl}_3$ )  $\delta$  -58.8 (t,  $J = 6.4$  Hz, 3F), -80.5 (s, 3F); HRMS (EI): calcd for  $\text{C}_{11}\text{H}_{10}\text{F}_6\text{OS}$   $[\text{M}]^+$ : 304.0357, found: 304.0360.

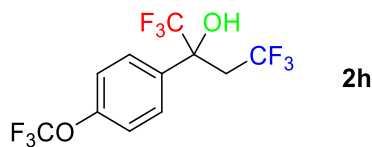

**1,1,1,4,4,4-Hexafluoro-2-(4-(trifluoromethoxy)phenyl)butan-2-ol (2h).** brown oil; yield 80% (273.6 mg);  $^1\text{H}$  NMR (400 MHz,  $\text{CDCl}_3$ )  $\delta$  7.55 (d,  $J = 8.8$  Hz, 2H), 7.20 (d,  $J = 8.0$  Hz, 2H), 3.05–2.82 (m, 3H);  $^{13}\text{C}$  NMR (100 MHz,  $\text{CDCl}_3$ )  $\delta$  148.9, 132.0, 126.8, 123.6 (q,  $^1J_{\text{CF}} = 276.0$  Hz), 123.2 (q,  $^1J_{\text{CF}} = 283.8$  Hz), 119.6, 119.4 (q,  $^1J_{\text{CF}} = 256.3$  Hz), 73.6 (qd,  $^2J_{\text{CF}} = 29.3$  Hz,  $^3J_{\text{CF}} = 2.1$  Hz), 38.2 (q,  $^2J_{\text{CF}} = 28.4$  Hz);  $^{19}\text{F}$  NMR (376 MHz,  $\text{CDCl}_3$ )  $\delta$  -57.9 (s, 3F), -58.9 (t,  $J = 7.5$  Hz, 3F), -80.8 (s, 3F); HRMS (EI): calcd for  $\text{C}_{11}\text{H}_7\text{F}_9\text{O}_2$   $[\text{M}]^+$ : 342.0302, found: 342.0300.

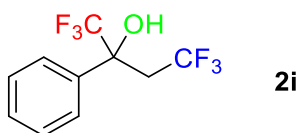

**1,1,1,4,4,4-Hexafluoro-2-phenylbutan-2-ol (2i).** yellow oil; yield 87% (224.5 mg);  $^1\text{H NMR}$  (400 MHz,  $\text{CDCl}_3$ )  $\delta$  7.50 (d,  $J = 6.4$  Hz, 2H), 7.39–7.33 (m, 3H), 3.07–2.83 (m, 3H);  $^{13}\text{C NMR}$  (100 MHz,  $\text{CDCl}_3$ )  $\delta$  133.5, 128.2, 127.5, 124.9, 123.8 (q,  $^1J_{\text{CF}} = 276.4$  Hz), 123.4 (q,  $^1J_{\text{CF}} = 284.8$  Hz), 73.9 (qd,  $^2J_{\text{CF}} = 29.1$  Hz,  $^3J_{\text{CF}} = 2.0$  Hz), 38.2 (q,  $^2J_{\text{CF}} = 28.0$  Hz);  $^{19}\text{F NMR}$  (376 MHz,  $\text{CDCl}_3$ )  $\delta$  -58.8 (t,  $J = 6.8$  Hz, 3F), -80.7 (s, 3F); HRMS (EI): calcd for  $\text{C}_{10}\text{H}_8\text{F}_6\text{O}$   $[\text{M}]^+$ : 258.0479, found: 258.0477.

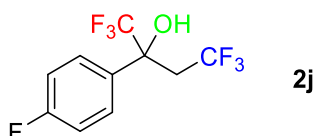

**1,1,1,4,4,4-Hexafluoro-2-(4-fluorophenyl)butan-2-ol (2j).** yellow oil; yield 87% (240.1 mg);  $^1\text{H NMR}$  (400 MHz,  $\text{CDCl}_3$ )  $\delta$  7.51–7.47 (m, 2H), 7.07–7.01 (m, 2H), 3.04–2.80 (m, 3H);  $^{13}\text{C NMR}$  (100 MHz,  $\text{CDCl}_3$ )  $\delta$  162.2 (d,  $^1J_{\text{CF}} = 247.2$  Hz), 129.2 (d,  $^4J_{\text{CF}} = 3.2$  Hz), 127.1 (d,  $^3J_{\text{CF}} = 8.4$  Hz), 123.7 (q,  $^1J_{\text{CF}} = 276.1$  Hz), 123.3 (q,  $^1J_{\text{CF}} = 284.6$  Hz), 114.5 (d,  $^2J_{\text{CF}} = 21.7$  Hz), 73.7 (qd,  $^2J_{\text{CF}} = 29.5$  Hz,  $^3J_{\text{CF}} = 2.0$  Hz), 38.2 (q,  $^2J_{\text{CF}} = 27.8$  Hz);  $^{19}\text{F NMR}$  (376 MHz,  $\text{CDCl}_3$ )  $\delta$  -58.8 (t,  $J = 7.1$  Hz, 3F), -81.0 (s, 3F), -112.60–-112.65 (m, 1F); HRMS (EI): calcd for  $\text{C}_{10}\text{H}_7\text{F}_7\text{O}$   $[\text{M}]^+$ : 276.0385, found: 276.0383.

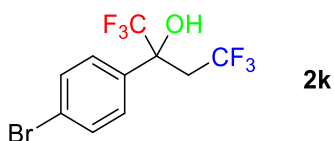

**2-(4-Bromophenyl)-1,1,1,4,4,4-hexafluorobutan-2-ol (2k).** yellow oil; yield 84% (282.2 mg);  $^1\text{H NMR}$  (400 MHz,  $\text{CDCl}_3$ )  $\delta$  7.49 (d,  $J = 8.8$  Hz, 2H), 7.38 (d,  $J = 8.4$  Hz, 2H), 3.08–2.80 (m, 3H);  $^{13}\text{C NMR}$  (100 MHz,  $\text{CDCl}_3$ )  $\delta$  132.5, 130.7, 126.8, 123.6 (q,  $^1J_{\text{CF}} = 276.3$  Hz), 123.1 (q,  $^1J_{\text{CF}} = 284.2$  Hz), 122.7, 73.6 (qd,  $^2J_{\text{CF}} = 29.2$  Hz,  $^3J_{\text{CF}} = 2.1$  Hz), 38.0 (q,  $^2J_{\text{CF}} = 28.0$  Hz);  $^{19}\text{F NMR}$  (376 MHz,  $\text{CDCl}_3$ )  $\delta$  -58.8 (t,  $J = 6.8$  Hz, 3F), -80.8 (s, 3F); HRMS (EI): calcd for  $\text{C}_{10}\text{H}_7\text{BrF}_6\text{O}$   $[\text{M}]^+$ : 335.9584, found: 335.9579.

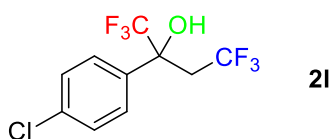

**2-(4-Chlorophenyl)-1,1,1,4,4,4-hexafluorobutan-2-ol (2l).** colorless oil; yield 83% (242.4 mg);  $^1\text{H NMR}$  (400 MHz,  $\text{CDCl}_3$ )  $\delta$  7.45 (d,  $J = 8.8$  Hz, 2H), 7.34 (d,  $J = 8.8$  Hz, 2H), 3.03–2.80 (m, 3H);  $^{13}\text{C NMR}$  (100 MHz,  $\text{CDCl}_3$ )  $\delta$  134.5, 132.0, 127.7, 126.5, 123.6 (q,  $^1J_{\text{CF}} = 276.2$  Hz), 123.2 (q,  $^1J_{\text{CF}} = 284.4$  Hz), 73.6 (qd,  $^2J_{\text{CF}} = 29.6$  Hz,  $^3J_{\text{CF}} = 2.0$  Hz), 38.1 (q,  $^2J_{\text{CF}} = 27.9$  Hz);  $^{19}\text{F NMR}$  (376 MHz,  $\text{CDCl}_3$ )  $\delta$  -58.8 (t,  $J = 7.1$  Hz, 3F), -80.8 (s, 3F); HRMS (EI): calcd for  $\text{C}_{10}\text{H}_7\text{ClF}_6\text{O}$   $[\text{M}]^+$ : 292.0090, found: 292.0086.

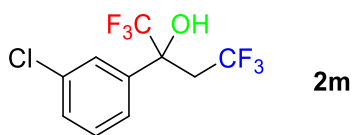

**2-(3-Chlorophenyl)-1,1,1,4,4,4-hexafluorobutan-2-ol (2m).** yellow oil; yield 86% (251.1 mg);  $^1\text{H}$  NMR (400 MHz,  $\text{CDCl}_3$ )  $\delta$  7.54 (s, 1H), 7.38–7.27 (m, 3H), 3.02–2.81 (m, 3H);  $^{13}\text{C}$  NMR (100 MHz,  $\text{CDCl}_3$ )  $\delta$  135.5, 133.8, 128.7, 128.5, 125.5, 123.6 (q,  $^1J_{\text{CF}} = 276.1$  Hz), 123.2, 123.2 (q,  $^1J_{\text{CF}} = 284.0$  Hz), 73.6 (qd,  $^2J_{\text{CF}} = 29.7$  Hz,  $^3J_{\text{CF}} = 2.3$  Hz), 38.2 (q,  $^2J_{\text{CF}} = 27.6$  Hz);  $^{19}\text{F}$  NMR (376 MHz,  $\text{CDCl}_3$ )  $\delta$  –58.9 (t,  $J = 7.5$  Hz, 3F), –80.6 (s, 3F); HRMS (EI): calcd for  $\text{C}_{10}\text{H}_7\text{ClF}_6\text{O}$   $[\text{M}]^+$ : 292.0090, found: 292.0087.

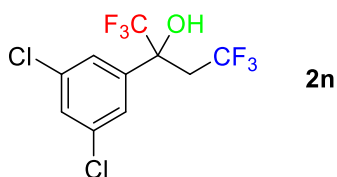

**2-(3,5-Dichlorophenyl)-1,1,1,4,4,4-hexafluorobutan-2-ol (2n).** colorless oil; yield 85% (277.1 mg);  $^1\text{H}$  NMR (400 MHz,  $\text{CDCl}_3$ )  $\delta$  7.41 (s, 2H), 7.35 (t,  $J = 2.0$  Hz, 1H), 3.00–2.81 (m, 3H);  $^{13}\text{C}$  NMR (100 MHz,  $\text{CDCl}_3$ )  $\delta$  136.9, 134.4, 128.6, 123.9, 123.4 (q,  $^1J_{\text{CF}} = 276.2$  Hz), 123.0 (q,  $^1J_{\text{CF}} = 284.2$  Hz), 73.3 (qd,  $^2J_{\text{CF}} = 29.6$  Hz,  $^3J_{\text{CF}} = 2.1$  Hz), 38.2 (q,  $^2J_{\text{CF}} = 28.0$  Hz);  $^{19}\text{F}$  NMR (376 MHz,  $\text{CDCl}_3$ )  $\delta$  –58.9 (t,  $J = 7.1$  Hz, 3F), –80.5 (s, 3F); HRMS (EI): calcd for  $\text{C}_{10}\text{H}_6\text{Cl}_2\text{F}_6\text{O}$   $[\text{M}]^+$ : 325.9700, found: 325.9703.

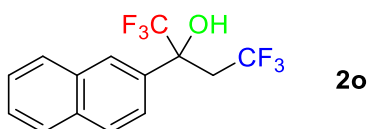

**1,1,1,4,4,4-Hexafluoro-2-(naphthalen-2-yl)butan-2-ol (2o).** white solid; m.p.: 68.4–72.9 °C, yield 89% (274.2 mg);  $^1\text{H}$  NMR (400 MHz,  $\text{CDCl}_3$ )  $\delta$  8.04 (s, 1H), 7.82–7.77 (m, 3H), 7.52 (d,  $J = 8.8$  Hz, 1H), 7.48–7.43 (m, 2H), 3.18–2.89 (m, 3H);  $^{13}\text{C}$  NMR (100 MHz,  $\text{CDCl}_3$ )  $\delta$  133.3, 132.8, 131.8, 128.6, 128.4, 127.6, 127.1, 126.7, 126.1, 124.8 (q,  $^1J_{\text{CF}} = 276.3$  Hz), 124.5 (q,  $^1J_{\text{CF}} = 276.2$  Hz), 123.0, 75.1 (qd,  $^2J_{\text{CF}} = 29.0$  Hz,  $^3J_{\text{CF}} = 2.1$  Hz), 39.2 (q,  $^2J_{\text{CF}} = 27.1$  Hz);  $^{19}\text{F}$  NMR (376 MHz,  $\text{CDCl}_3$ )  $\delta$  –58.8 (t,  $J = 6.8$  Hz, 3F), –80.3 (s, 3F); HRMS (EI): calcd for  $\text{C}_{14}\text{H}_{10}\text{F}_6\text{O}$   $[\text{M}]^+$ : 308.0636, found: 308.0639.

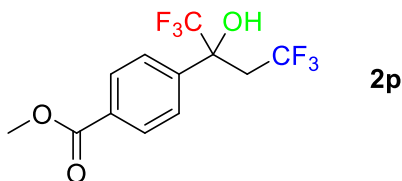

**Methyl 4-(1,1,1,4,4,4-hexafluoro-2-hydroxybutan-2-yl)benzoate (2p).** white solid; m.p.: 85.3–88.5 °C, yield 92% (290.8 mg);  $^1\text{H}$  NMR (400 MHz,  $\text{CDCl}_3$ )  $\delta$  8.01 (d,  $J = 8.4$  Hz, 2H), 7.62 (d,  $J = 8.4$  Hz, 2H), 3.86 (s, 3H), 3.56 (s, 1H), 3.08–2.85 (m, 2H);  $^{13}\text{C}$  NMR (100 MHz,  $\text{CDCl}_3$ )  $\delta$  165.7, 138.4, 129.8, 128.6, 125.3, 123.6 (q,  $^1J_{\text{CF}} = 276.3$  Hz), 123.3 (q,  $^1J_{\text{CF}} = 284.3$  Hz), 73.8 (qd,  $^2J_{\text{CF}} = 29.3$  Hz,  $^3J_{\text{CF}} = 2.3$  Hz), 51.4, 38.1 (q,  $^2J_{\text{CF}} = 27.9$  Hz);  $^{19}\text{F}$  NMR (376 MHz,  $\text{CDCl}_3$ )  $\delta$  –58.9 (t,  $J = 6.4$  Hz, 3F), –80.5 (s, 3F); HRMS (EI): calcd for  $\text{C}_{12}\text{H}_{10}\text{F}_6\text{O}_3$   $[\text{M}]^+$ : 316.0534, found: 316.0536.

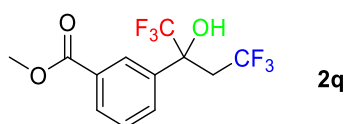

**Methyl 3-(1,1,1,4,4,4-hexafluoro-2-hydroxybutan-2-yl)benzoate (2q).** white solid; m.p.: 101.3–103.2 °C, yield 93% (293.9 mg); <sup>1</sup>H NMR (400 MHz, CDCl<sub>3</sub>) δ 8.29 (s, 1H), 8.10 (d, *J* = 8.0 Hz, 1H), 7.82 (d, *J* = 8.0 Hz, 1H), 7.53 (t, *J* = 7.6 Hz, 1H), 3.94 (s, 3H), 3.52 (s, 1H), 3.19–2.94 (m, 2H); <sup>13</sup>C NMR (100 MHz, CDCl<sub>3</sub>) δ 166.7, 135.2, 130.7, 130.5, 130.4, 128.7, 127.3, 124.7 (q, <sup>1</sup>*J*<sub>CF</sub> = 276.1 Hz), 124.3 (q, <sup>1</sup>*J*<sub>CF</sub> = 285.0 Hz), 74.7 (qd, <sup>2</sup>*J*<sub>CF</sub> = 29.4 Hz, <sup>3</sup>*J*<sub>CF</sub> = 1.8 Hz), 52.4, 39.1 (q, <sup>2</sup>*J*<sub>CF</sub> = 27.6 Hz); <sup>19</sup>F NMR (376 MHz, CDCl<sub>3</sub>) δ –58.8 (t, *J* = 6.8 Hz, 3F), –80.7 (s, 3F); HRMS (EI): calcd for C<sub>12</sub>H<sub>10</sub>F<sub>6</sub>O<sub>3</sub> [M]<sup>+</sup>: 316.0534, found: 316.0532.

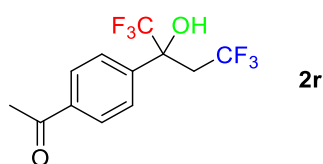

**1-(4-(1,1,1,4,4,4-Hexafluoro-2-hydroxybutan-2-yl)phenyl)ethan-1-one (2r).** white solid; m.p.: 128.0–133.1 °C, yield 90% (270.0 mg); <sup>1</sup>H NMR (400 MHz, CDCl<sub>3</sub>) δ 7.94 (d, *J* = 8.8 Hz, 2H), 7.65 (d, *J* = 8.0 Hz, 2H), 3.66 (s, 1H), 3.10–2.87 (m, 2H), 2.56 (s, 3H); <sup>13</sup>C NMR (100 MHz, CDCl<sub>3</sub>) δ 197.0, 138.6, 136.4, 127.4, 125.5, 123.6 (q, <sup>1</sup>*J*<sub>CF</sub> = 276.3 Hz), 123.3 (q, <sup>1</sup>*J*<sub>CF</sub> = 283.5 Hz), 73.8 (qd, <sup>2</sup>*J*<sub>CF</sub> = 29.3 Hz, <sup>3</sup>*J*<sub>CF</sub> = 2.0 Hz), 38.1 (q, <sup>2</sup>*J*<sub>CF</sub> = 27.8 Hz), 25.6; <sup>19</sup>F NMR (376 MHz, CDCl<sub>3</sub>) δ –58.8 (t, *J* = 6.4 Hz, 3F), –80.5 (s, 3F); HRMS (EI): calcd for C<sub>12</sub>H<sub>10</sub>F<sub>6</sub>O<sub>2</sub> [M]<sup>+</sup>: 300.0585, found: 300.0587.

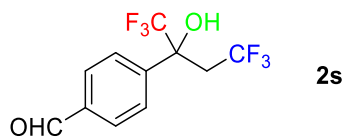

**4-(1,1,1,4,4,4-Hexafluoro-2-hydroxybutan-2-yl)benzaldehyde (2s).** white solid; m.p.: 137.6–143.4 °C, yield 91% (260.3 mg); <sup>1</sup>H NMR (400 MHz, (CD<sub>3</sub>)<sub>2</sub>CO) δ 10.11 (s, 1H), 8.03–7.99 (m, 4H), 6.49 (s, 1H), 3.64–3.52 (m, 1H), 3.23–3.12 (m, 1H); <sup>13</sup>C NMR (100 MHz, (CD<sub>3</sub>)<sub>2</sub>CO) δ 191.7, 141.7, 136.9, 129.0, 127.5, 125.3 (q, <sup>1</sup>*J*<sub>CF</sub> = 275.7 Hz), 124.9 (q, <sup>1</sup>*J*<sub>CF</sub> = 285.2 Hz), 74.6 (qd, <sup>2</sup>*J*<sub>CF</sub> = 28.7 Hz, <sup>3</sup>*J*<sub>CF</sub> = 2.3 Hz), 38.0 (q, <sup>2</sup>*J*<sub>CF</sub> = 27.6 Hz); <sup>19</sup>F NMR (376 MHz, (CD<sub>3</sub>)<sub>2</sub>CO) δ –59.2 (t, *J* = 7.5 Hz, 3F), –80.9 (s, 3F); HRMS (EI): calcd for C<sub>11</sub>H<sub>8</sub>F<sub>6</sub>O<sub>2</sub> [M]<sup>+</sup>: 286.0428, found: 286.0417.

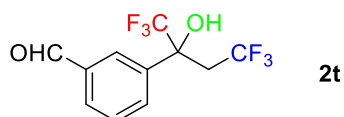

**3-(1,1,1,4,4,4-Hexafluoro-2-hydroxybutan-2-yl)benzaldehyde (2t).** white solid; m.p.: 98.3–102.1 °C, yield 90% (257.4 mg); <sup>1</sup>H NMR (400 MHz, CDCl<sub>3</sub>) δ 9.98 (s, 1H), 8.09 (s, 1H), 7.87 (d, *J* = 7.6 Hz, 1H), 7.82 (d, *J* = 7.6 Hz, 1H), 7.56 (t, *J* = 8.0 Hz, 1H), 3.50 (s, 1H), 3.13–2.89 (m, 2H); <sup>13</sup>C NMR (100 MHz, CDCl<sub>3</sub>) δ 191.1, 135.5, 135.0, 131.1, 129.7, 128.3, 126.4, 123.6 (q, <sup>1</sup>*J*<sub>CF</sub> = 276.3 Hz), 123.3 (q, <sup>1</sup>*J*<sub>CF</sub> = 284.2 Hz), 73.6 (qd, <sup>2</sup>*J*<sub>CF</sub> = 29.4 Hz, <sup>3</sup>*J*<sub>CF</sub> = 2.0 Hz), 38.1 (q, <sup>2</sup>*J*<sub>CF</sub> = 27.8 Hz); <sup>19</sup>F NMR (376 MHz, CDCl<sub>3</sub>) δ –58.8 (t, *J* = 6.8 Hz, 3F), –80.7 (s, 3F); HRMS (EI): calcd for C<sub>11</sub>H<sub>8</sub>F<sub>6</sub>O<sub>2</sub> [M]<sup>+</sup>: 286.0428, found: 286.0424.



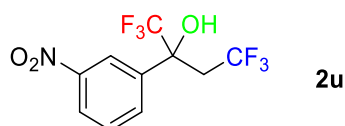

**1,1,1,4,4,4-Hexafluoro-2-(3-nitrophenyl)butan-2-ol (2u).** white solid; m.p.: 123.8–127.1 °C, yield 91% (275.8 mg);  $^1\text{H}$  NMR (400 MHz,  $\text{CDCl}_3$ )  $\delta$  8.45 (s, 1H), 8.24 (d,  $J = 8.4$  Hz, 1H), 7.87 (d,  $J = 8.0$  Hz, 1H), 7.58 (t,  $J = 8.0$  Hz, 1H), 3.13–2.89 (m, 3H);  $^{13}\text{C}$  NMR (100 MHz,  $\text{CDCl}_3$ )  $\delta$  147.4, 135.7, 131.2, 128.7, 123.4 (q,  $^1J_{\text{CF}} = 276.2$  Hz), 123.3, 123.0 (q,  $^1J_{\text{CF}} = 284.7$  Hz), 120.6, 73.5 (qd,  $^2J_{\text{CF}} = 30.1$  Hz,  $^3J_{\text{CF}} = 2.3$  Hz), 38.1 (q,  $^2J_{\text{CF}} = 28.1$  Hz);  $^{19}\text{F}$  NMR (376 MHz,  $\text{CDCl}_3$ )  $\delta$  -58.8 (t,  $J = 7.1$  Hz, 3F), -80.7 (s, 3F); HRMS (EI): calcd for  $\text{C}_{10}\text{H}_7\text{F}_6\text{NO}_3$   $[\text{M}]^+$ : 303.0330, found: 303.0327.

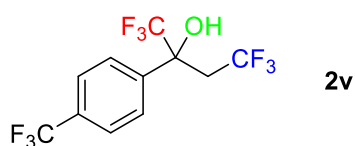

**1,1,1,4,4,4-Hexafluoro-2-(4-(trifluoromethyl)phenyl)butan-2-ol (2v).** yellow oil; yield 84% (273.9 mg);  $^1\text{H}$  NMR (400 MHz,  $\text{CDCl}_3$ )  $\delta$  7.67–7.61 (m, 4H), 3.08–2.84 (m, 3H);  $^{13}\text{C}$  NMR (100 MHz,  $\text{CDCl}_3$ )  $\delta$  137.4, 130.5 (q,  $^2J_{\text{CF}} = 32.7$  Hz), 125.7, 123.5 (q,  $^1J_{\text{CF}} = 276.1$  Hz), 124.5 (q,  $^3J_{\text{CF}} = 3.7$  Hz), 123.2 (q,  $^1J_{\text{CF}} = 284.7$  Hz), 122.8 (q,  $^1J_{\text{CF}} = 270.7$  Hz), 73.7 (qd,  $^2J_{\text{CF}} = 29.2$  Hz,  $^3J_{\text{CF}} = 1.9$  Hz), 38.2 (q,  $^2J_{\text{CF}} = 27.9$  Hz);  $^{19}\text{F}$  NMR (376 MHz,  $\text{CDCl}_3$ )  $\delta$  -58.9 (t,  $J = 7.5$  Hz, 3F), -62.9 (s, 3F), -80.6 (s, 3F); HRMS (EI): calcd for  $\text{C}_{11}\text{H}_7\text{F}_9\text{O}$   $[\text{M}]^+$ : 326.0353, found: 326.0350.

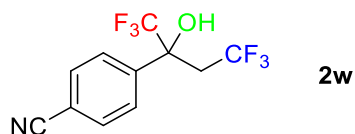

**4-(1,1,1,4,4,4-Hexafluoro-2-hydroxybutan-2-yl)benzotrile (2w).** white solid; m.p.: 178.7–180.2 °C, yield 88% (249.1 mg);  $^1\text{H}$  NMR (400 MHz,  $(\text{CD}_3)_2\text{CO}$ )  $\delta$  7.86 (d,  $J = 8.4$  Hz, 2H), 7.75 (d,  $J = 8.4$  Hz, 2H), 6.46 (s, 1H), 3.50–3.39 (m, 1H), 3.09–2.98 (m, 1H);  $^{13}\text{C}$  NMR (100 MHz,  $(\text{CD}_3)_2\text{CO}$ )  $\delta$  140.7, 131.9, 127.8, 125.2 (q,  $^1J_{\text{CF}} = 275.7$  Hz), 124.8 (q,  $^1J_{\text{CF}} = 284.9$  Hz), 118.0, 112.8, 74.4 (qd,  $^2J_{\text{CF}} = 28.9$  Hz,  $^3J_{\text{CF}} = 2.3$  Hz), 37.8 (q,  $^2J_{\text{CF}} = 27.7$  Hz);  $^{19}\text{F}$  NMR (376 MHz,  $(\text{CD}_3)_2\text{CO}$ )  $\delta$  -59.2 (t,  $J = 7.1$  Hz, 3F), -80.9 (s, 3F); HRMS (EI): calcd for  $\text{C}_{11}\text{H}_7\text{F}_6\text{NO}$   $[\text{M}]^+$ : 283.0432, found: 283.0429.

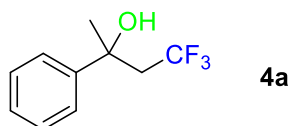

**4,4,4-Trifluoro-2-phenylbutan-2-ol (4a, CAS: 1417820-89-3).**<sup>2</sup> colorless oil; yield 74% (151.0 mg);  $^1\text{H}$  NMR (400 MHz,  $\text{CDCl}_3$ )  $\delta$  7.38 (d,  $J = 8.0$  Hz, 2H), 7.29 (t,  $J = 7.6$  Hz, 2H), 7.20 (t,  $J = 7.2$  Hz, 1H), 2.63–2.50 (m, 2H), 2.03 (s, 1H), 1.63 (s, 3H);  $^{13}\text{C}$  NMR (100 MHz,  $\text{CDCl}_3$ )  $\delta$  145.2, 127.4, 126.4, 123.4, 124.8 (q,  $^1J_{\text{CF}} = 276.7$  Hz), 70.9 (q,  $^3J_{\text{CF}} = 2.0$  Hz), 45.5 (q,  $^2J_{\text{CF}} = 25.6$  Hz), 28.6;  $^{19}\text{F}$  NMR (376 MHz,  $\text{CDCl}_3$ )  $\delta$  -60.2 (t,  $J = 7.1$  Hz, 3F).

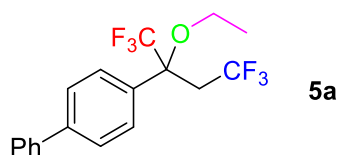

**4-(2-Ethoxy-1,1,1,4,4,4-hexafluorobutan-2-yl)-1,1'-biphenyl (5a).** colorless oil; yield 92% (333.8 mg);  $^1\text{H}$  NMR (400 MHz,  $\text{CDCl}_3$ )  $\delta$  7.56–7.51 (m, 6H), 7.36 (t,  $J = 7.6$  Hz, 2H), 7.28 (t,  $J = 7.2$  Hz, 1H), 3.62 (q,  $J = 6.8$  Hz, 2H), 3.05–2.78 (m, 2H), 1.25 (t,  $J = 6.8$  Hz, 3H);  $^{13}\text{C}$  NMR (100 MHz,  $\text{CDCl}_3$ )  $\delta$  140.7, 139.1, 132.4, 127.8, 126.7, 126.3, 126.1, 126.0, 123.6 (q,  $^1J_{\text{CF}} = 288.5$  Hz), 123.4 (q,  $^1J_{\text{CF}} = 276.2$  Hz), 78.2 (qd,  $^2J_{\text{CF}} = 27.1$  Hz,  $^3J_{\text{CF}} = 1.8$  Hz), 60.1, 36.5 (q,  $^2J_{\text{CF}} = 29.1$  Hz), 14.3;  $^{19}\text{F}$  NMR (376 MHz,  $\text{CDCl}_3$ )  $\delta$  -59.2 (q,  $J = 7.1$  Hz, 3F), -72.6 (s, 3F); HRMS (EI): calcd for  $\text{C}_{18}\text{H}_{16}\text{F}_6\text{O}$   $[\text{M}]^+$ : 362.1105, found: 362.1111.

## 8. Reference:

1. Y.-Q., Guo, Y.-P. Cao, H.-J. Song, Y.-X. Liu and Q.-M. Wang, *Chem. Commun.*, 2021, **57**, 9768–9771.
2. W.-G. Shen, Q.-Y. Wu, X.-Y. Gong, G.-Z. Ao and F. Liu, *Green Chem.*, 2019, **21**, 2983–2987.

## 9. $^1\text{H}$ , $^{13}\text{C}$ , $^{19}\text{F}$ NMR and HRMS (EI) spectra of the target compounds

### $^1\text{H}$ NMR spectrum of 2a

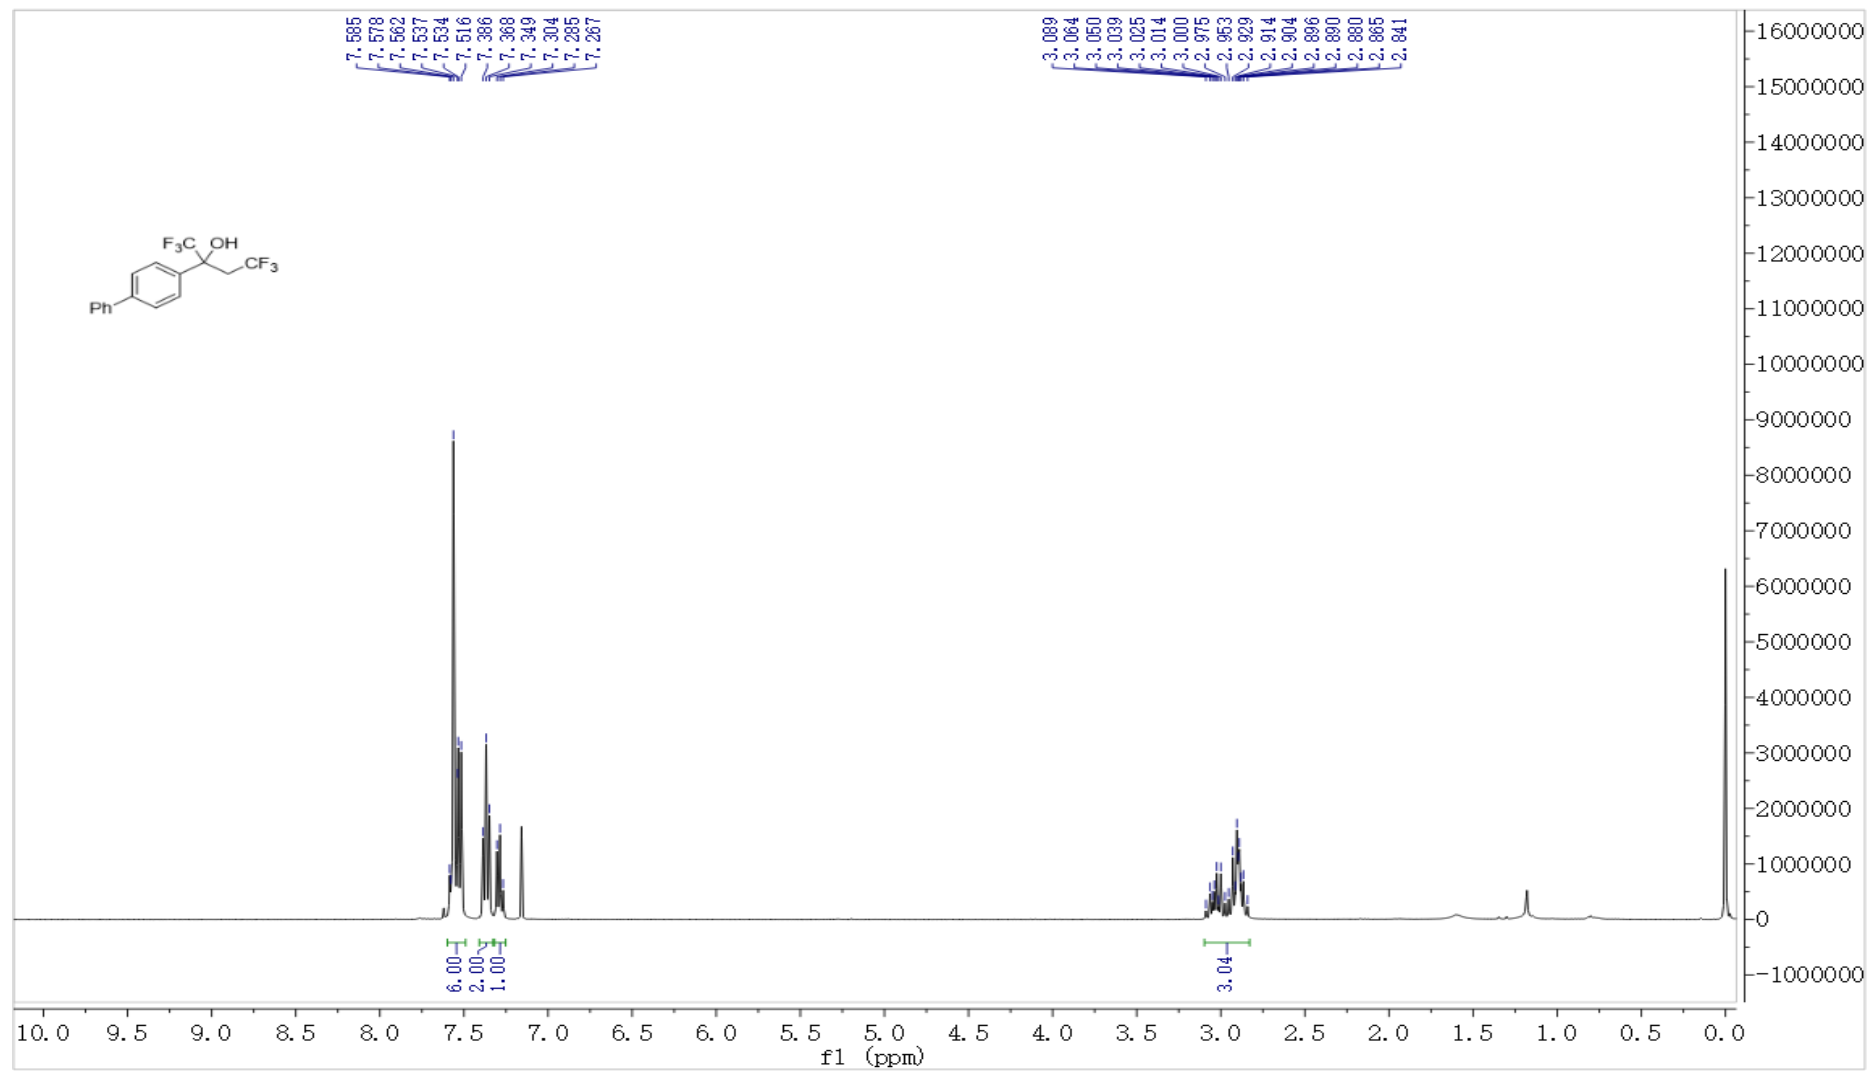

<sup>13</sup>C NMR spectrum of 2a

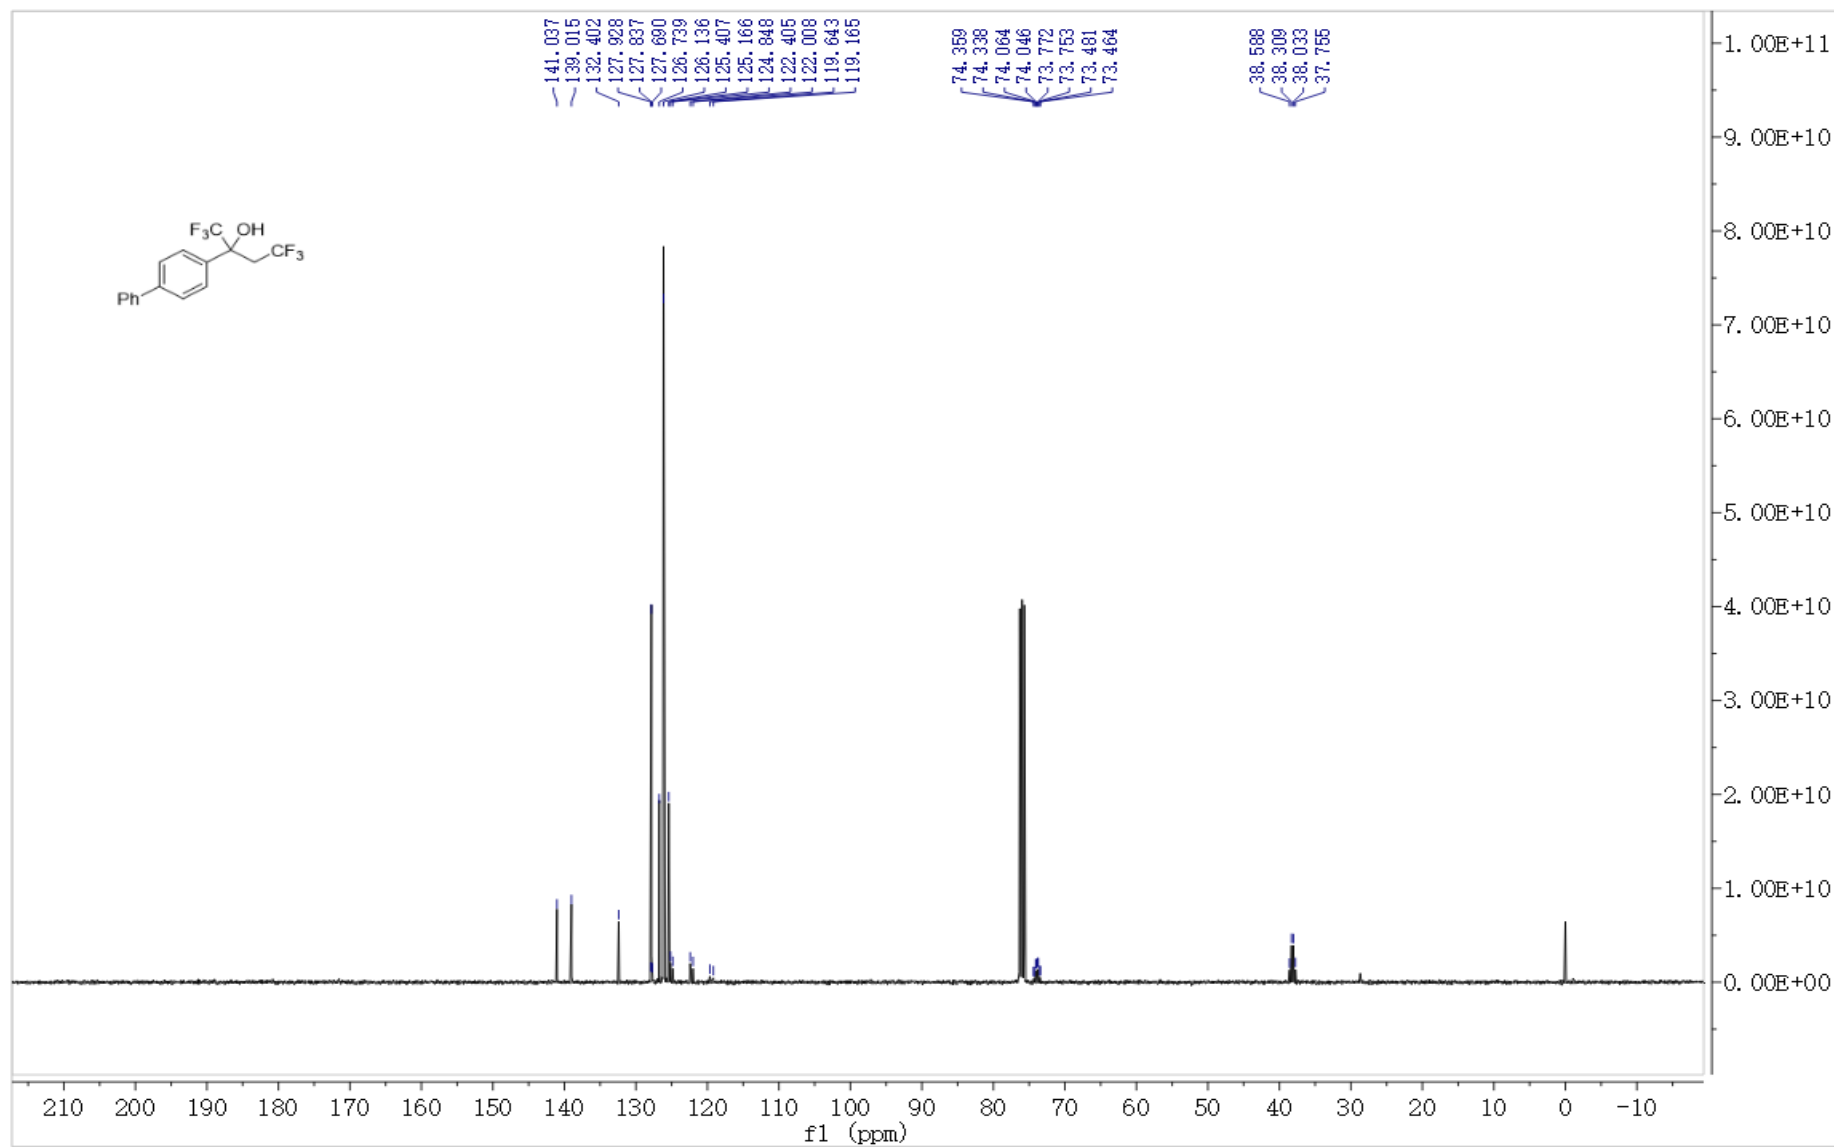

**<sup>19</sup>F NMR spectrum of 2a**

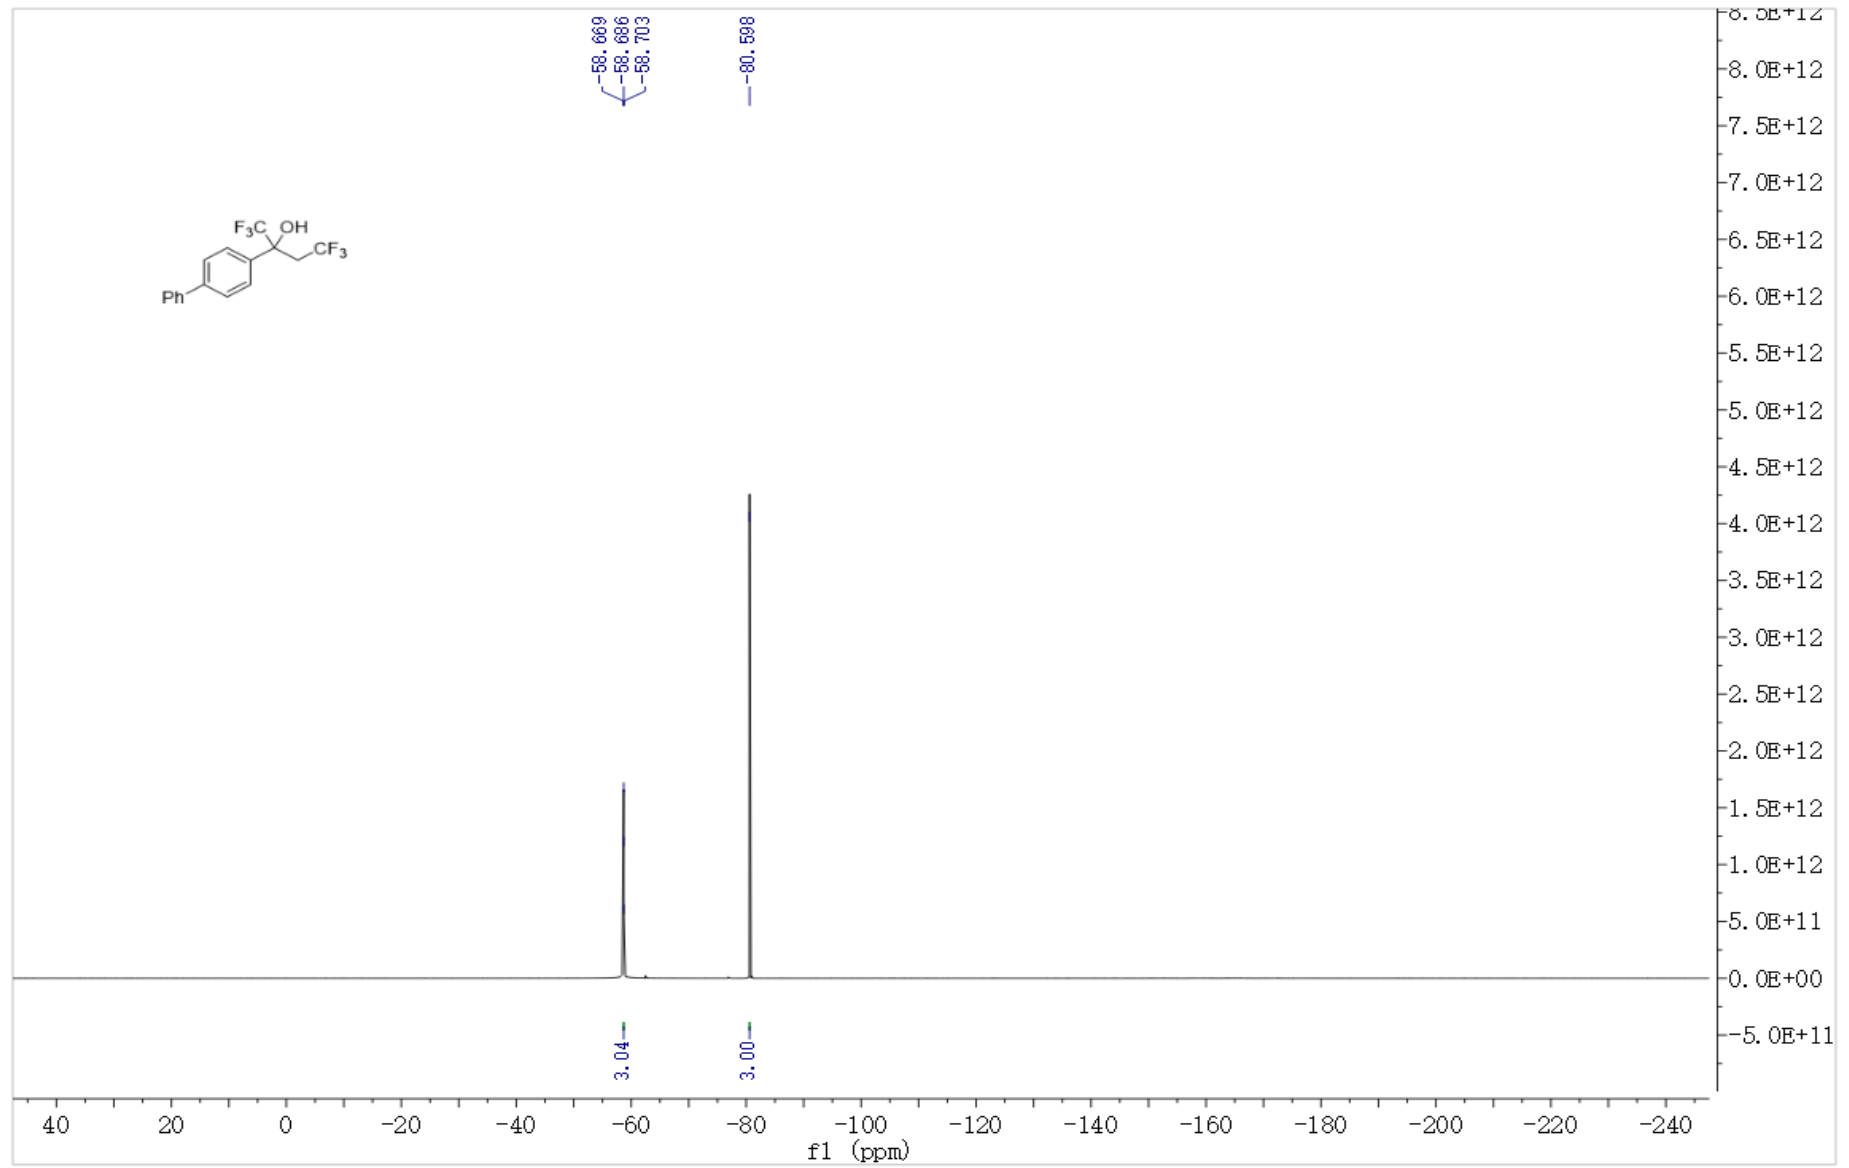

HRMS (EI) spectrum of 2a

CS-LC-P-334

Waters GCT Premier

20212808 112 (1.867) Cm (112-(10+43))

TOF MS EI+  
1.40e4

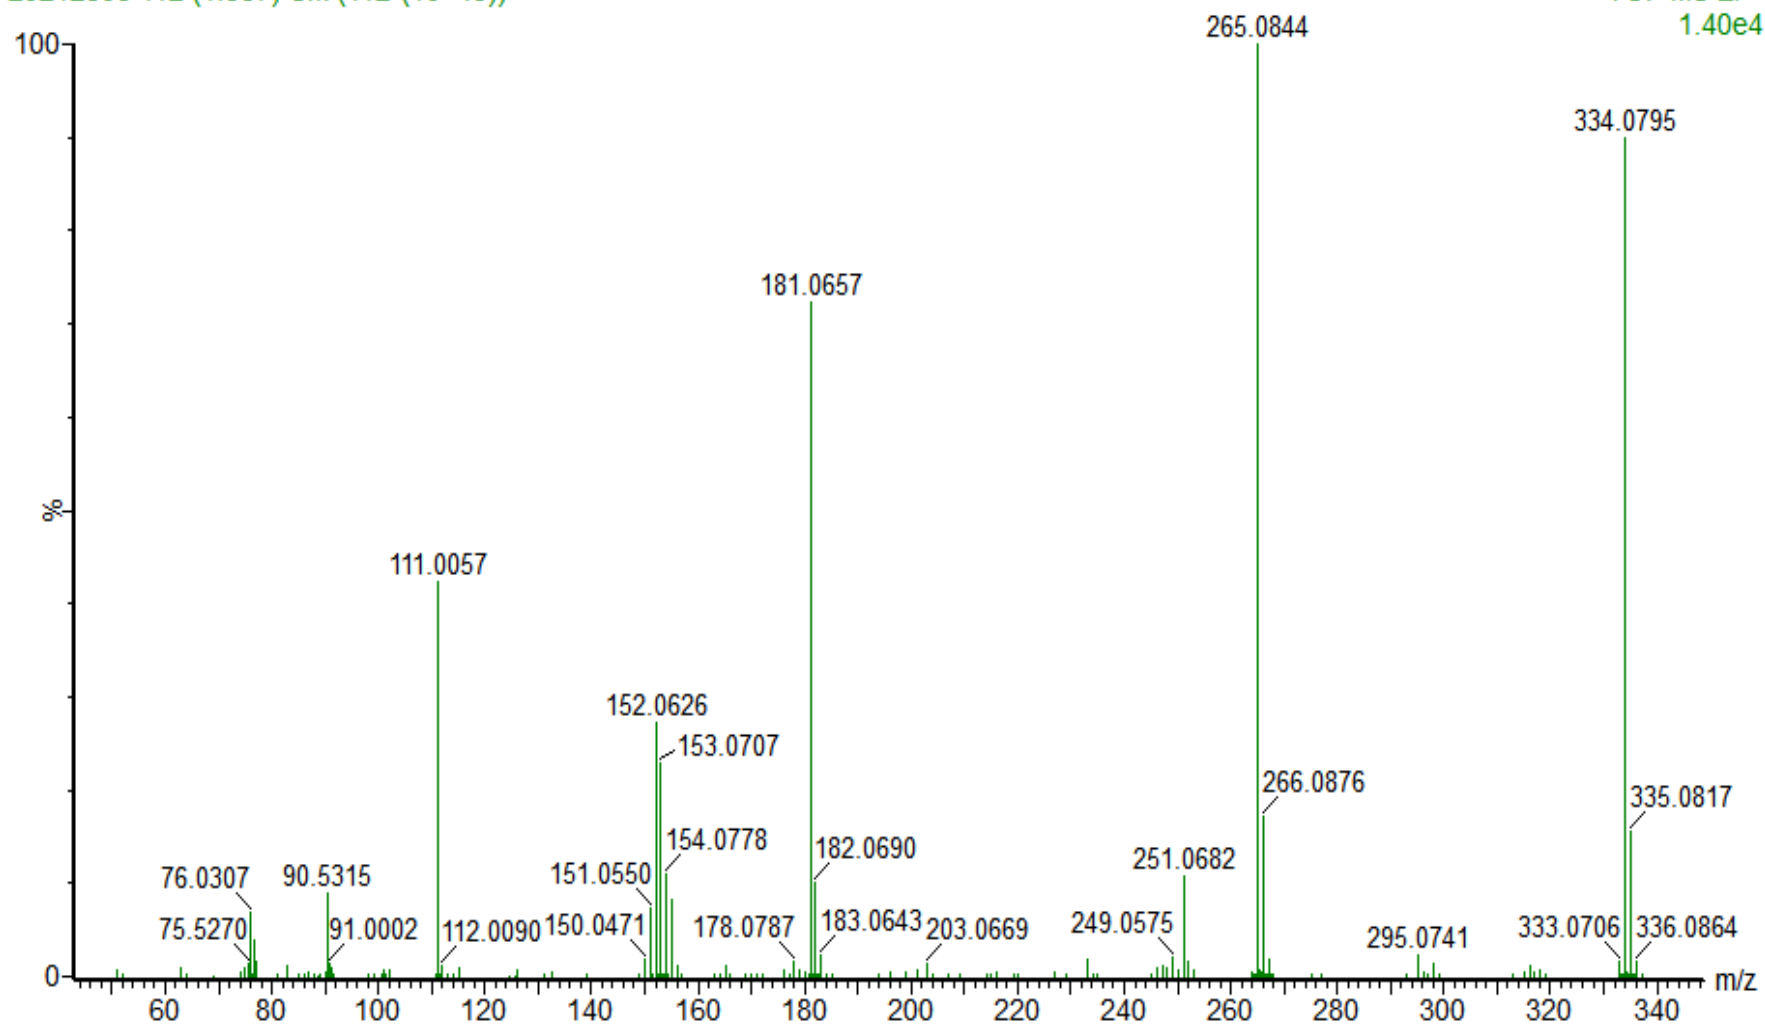

<sup>1</sup>H NMR spectrum of 2b

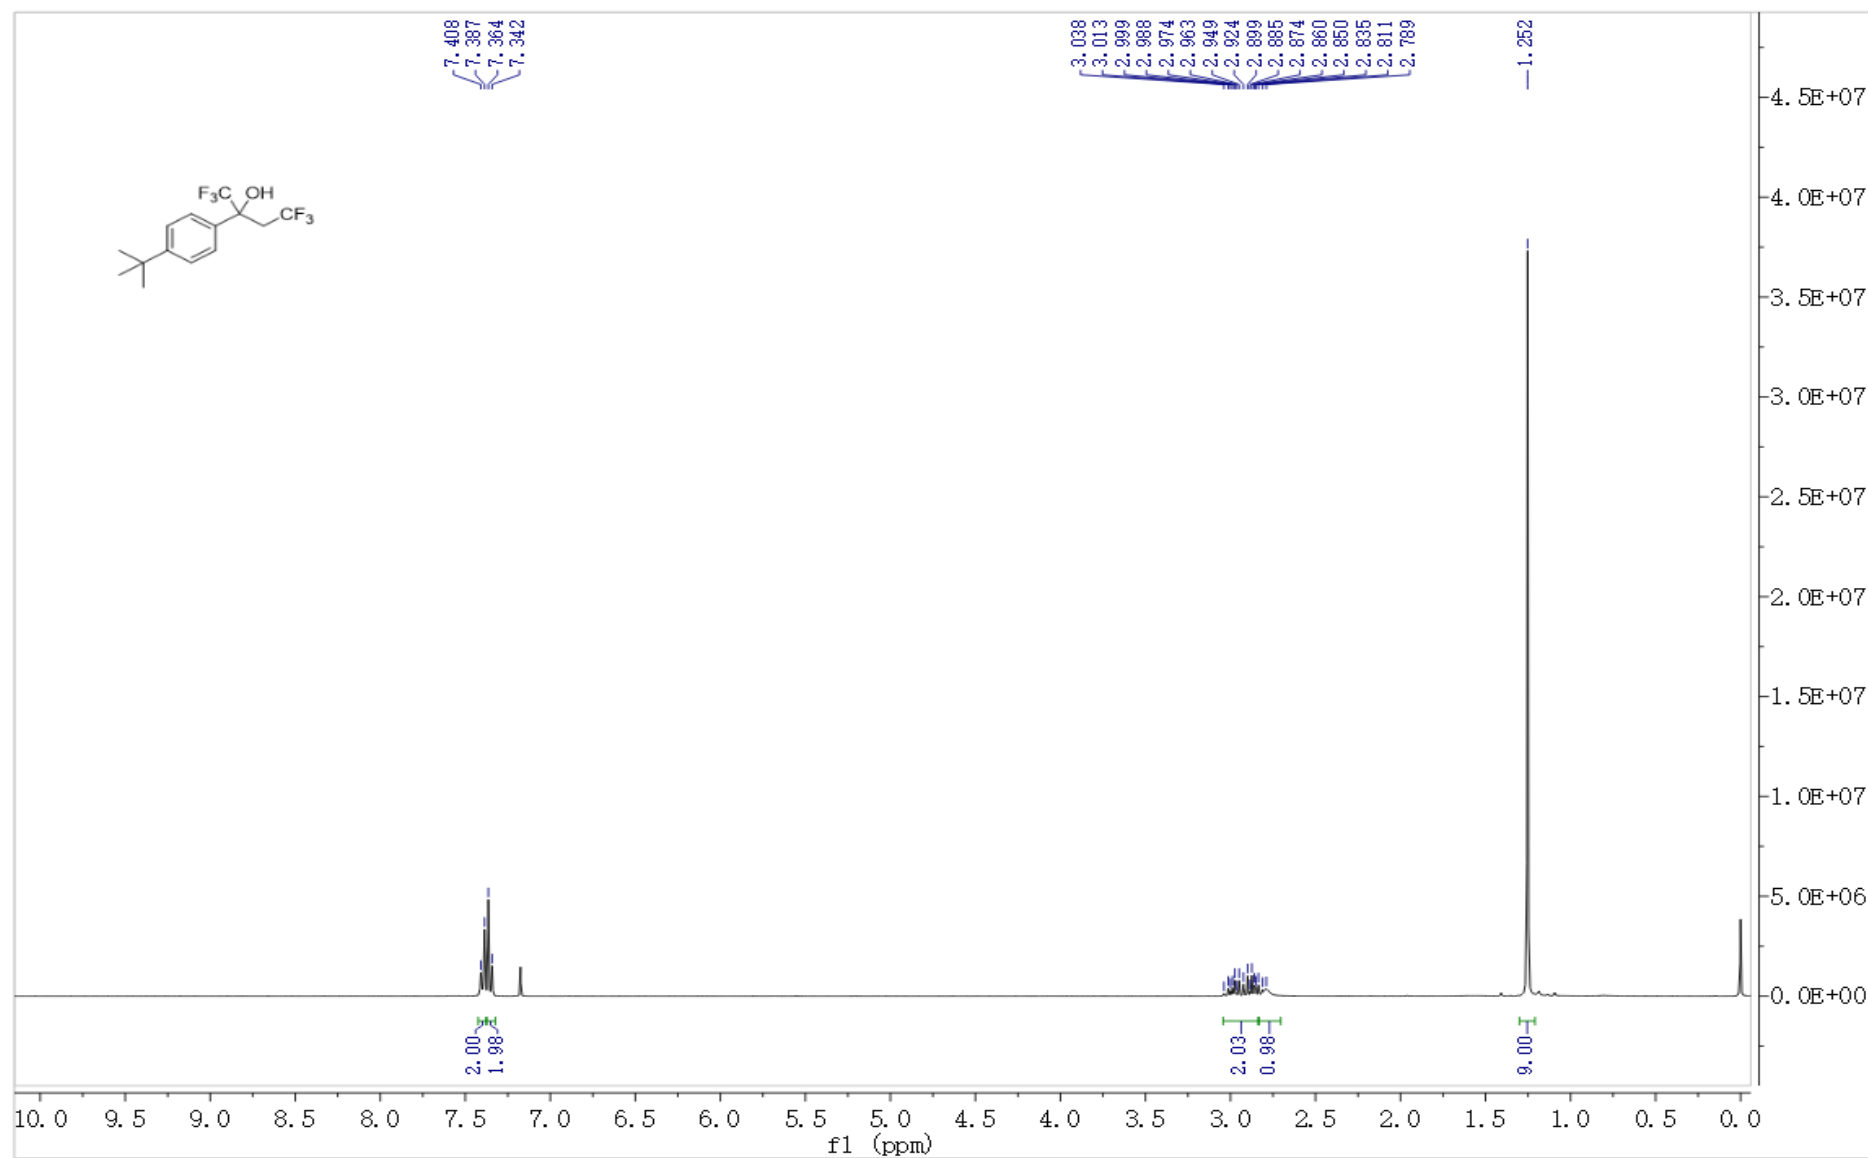

<sup>13</sup>C NMR spectrum of 2b

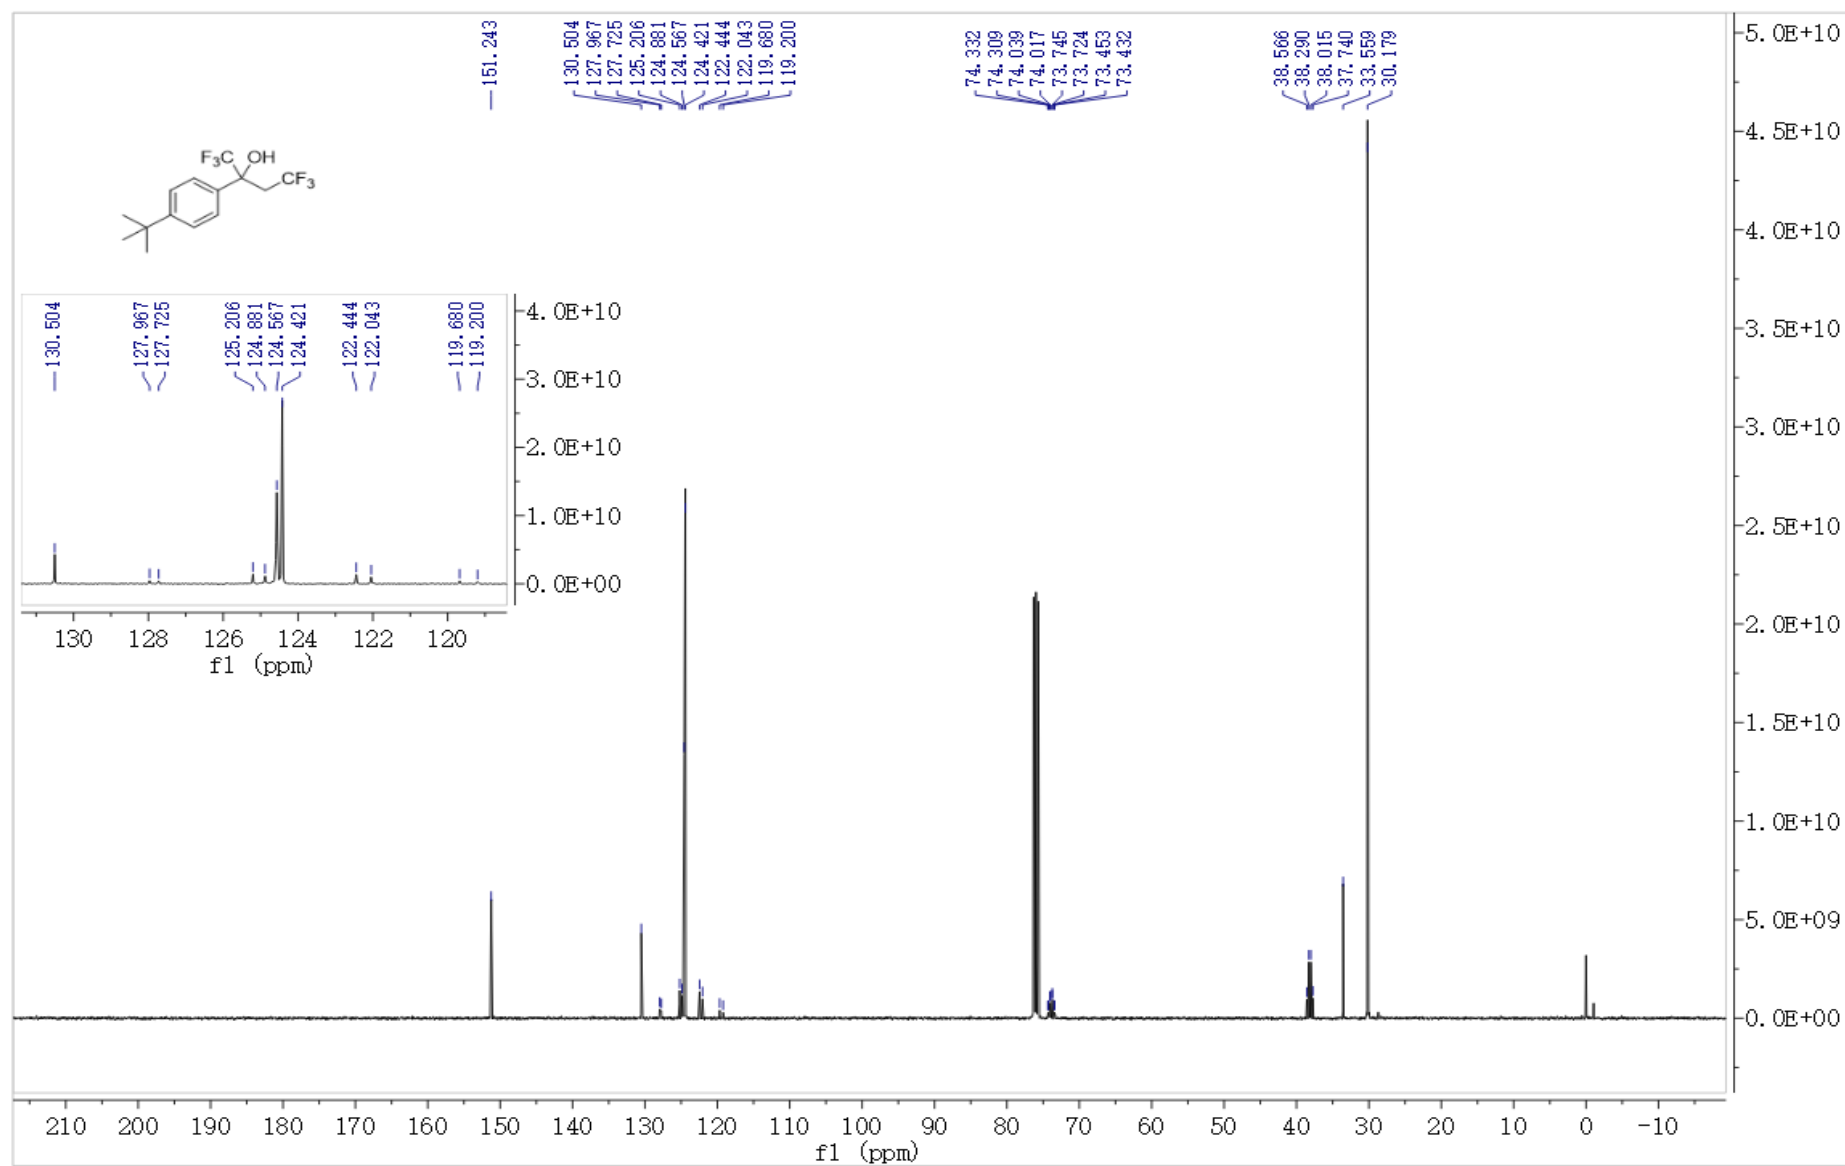



**<sup>19</sup>F NMR spectrum of 2b**

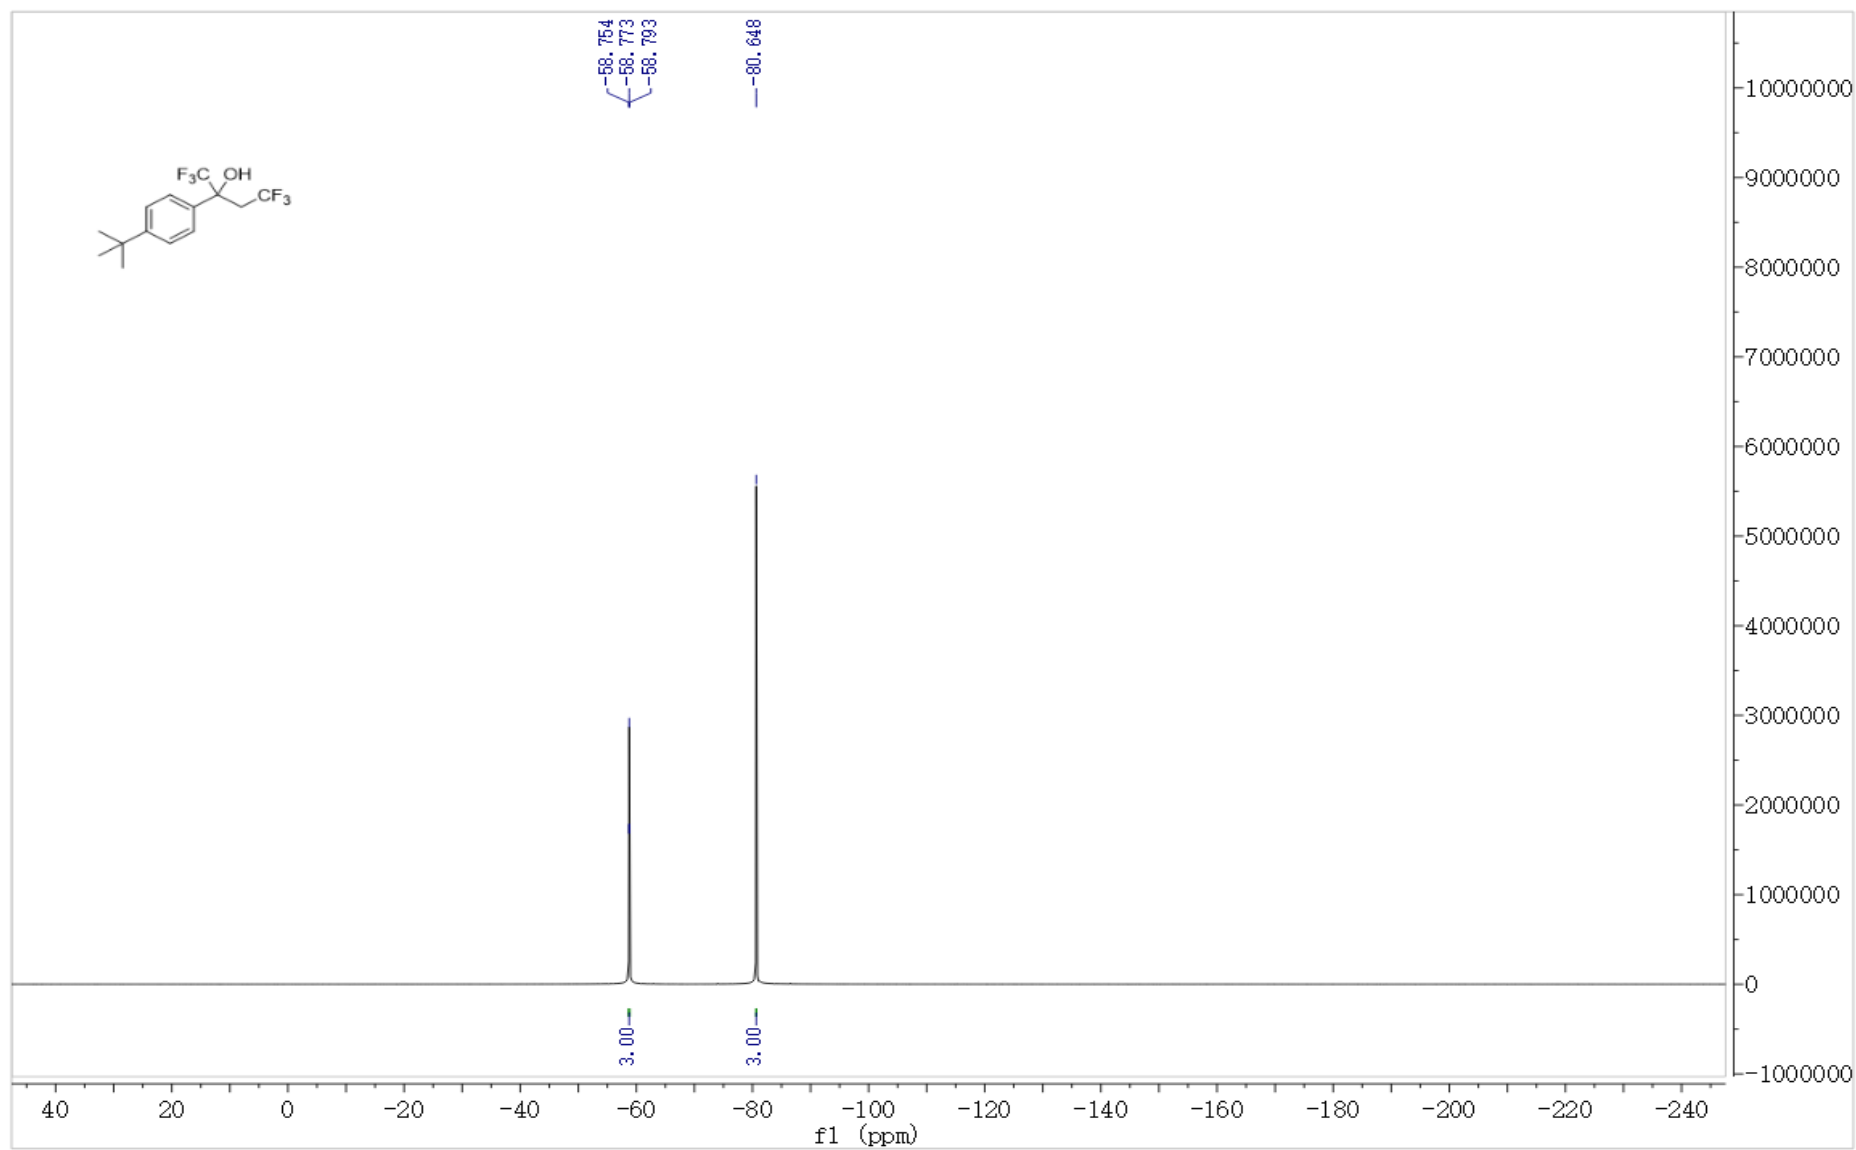

HRMS (EI) spectrum of 2b

CS-LC-P-314

Waters GCT Premier

2022030 258 (4.300) Cm (258-(41+392))

TOF MS EI+

299.0873

1.71e4

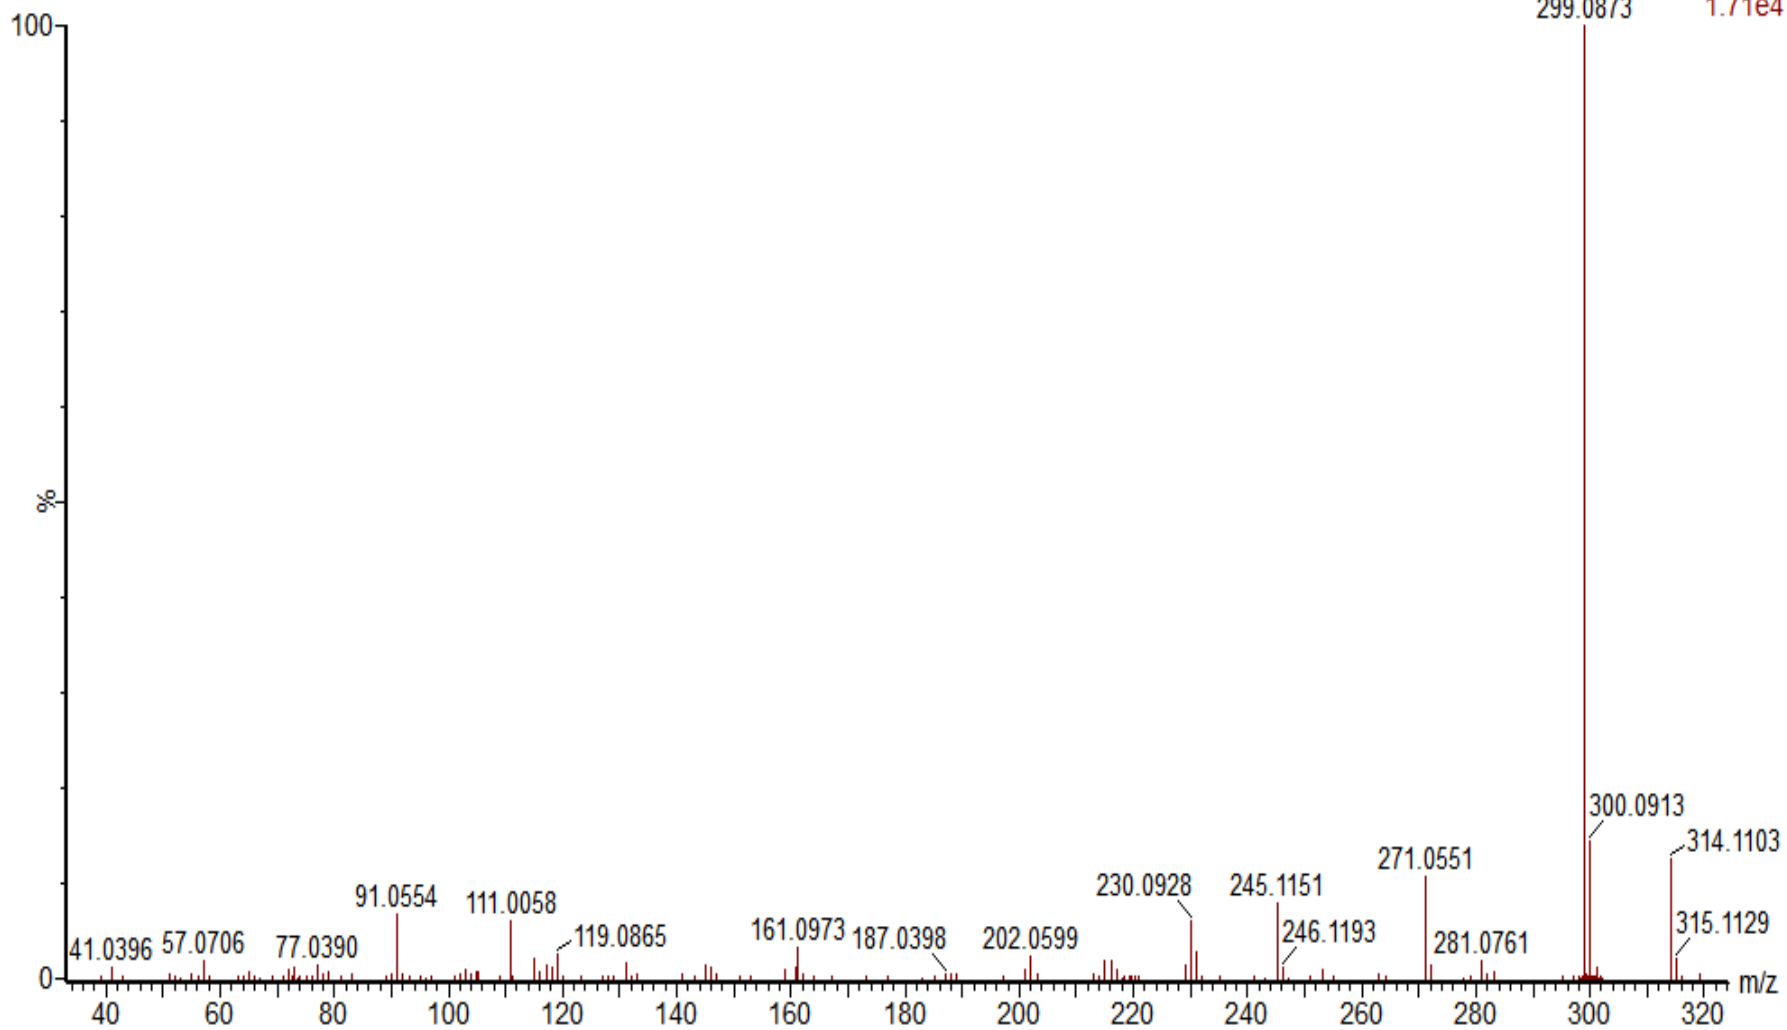

<sup>1</sup>H NMR spectrum of 2c

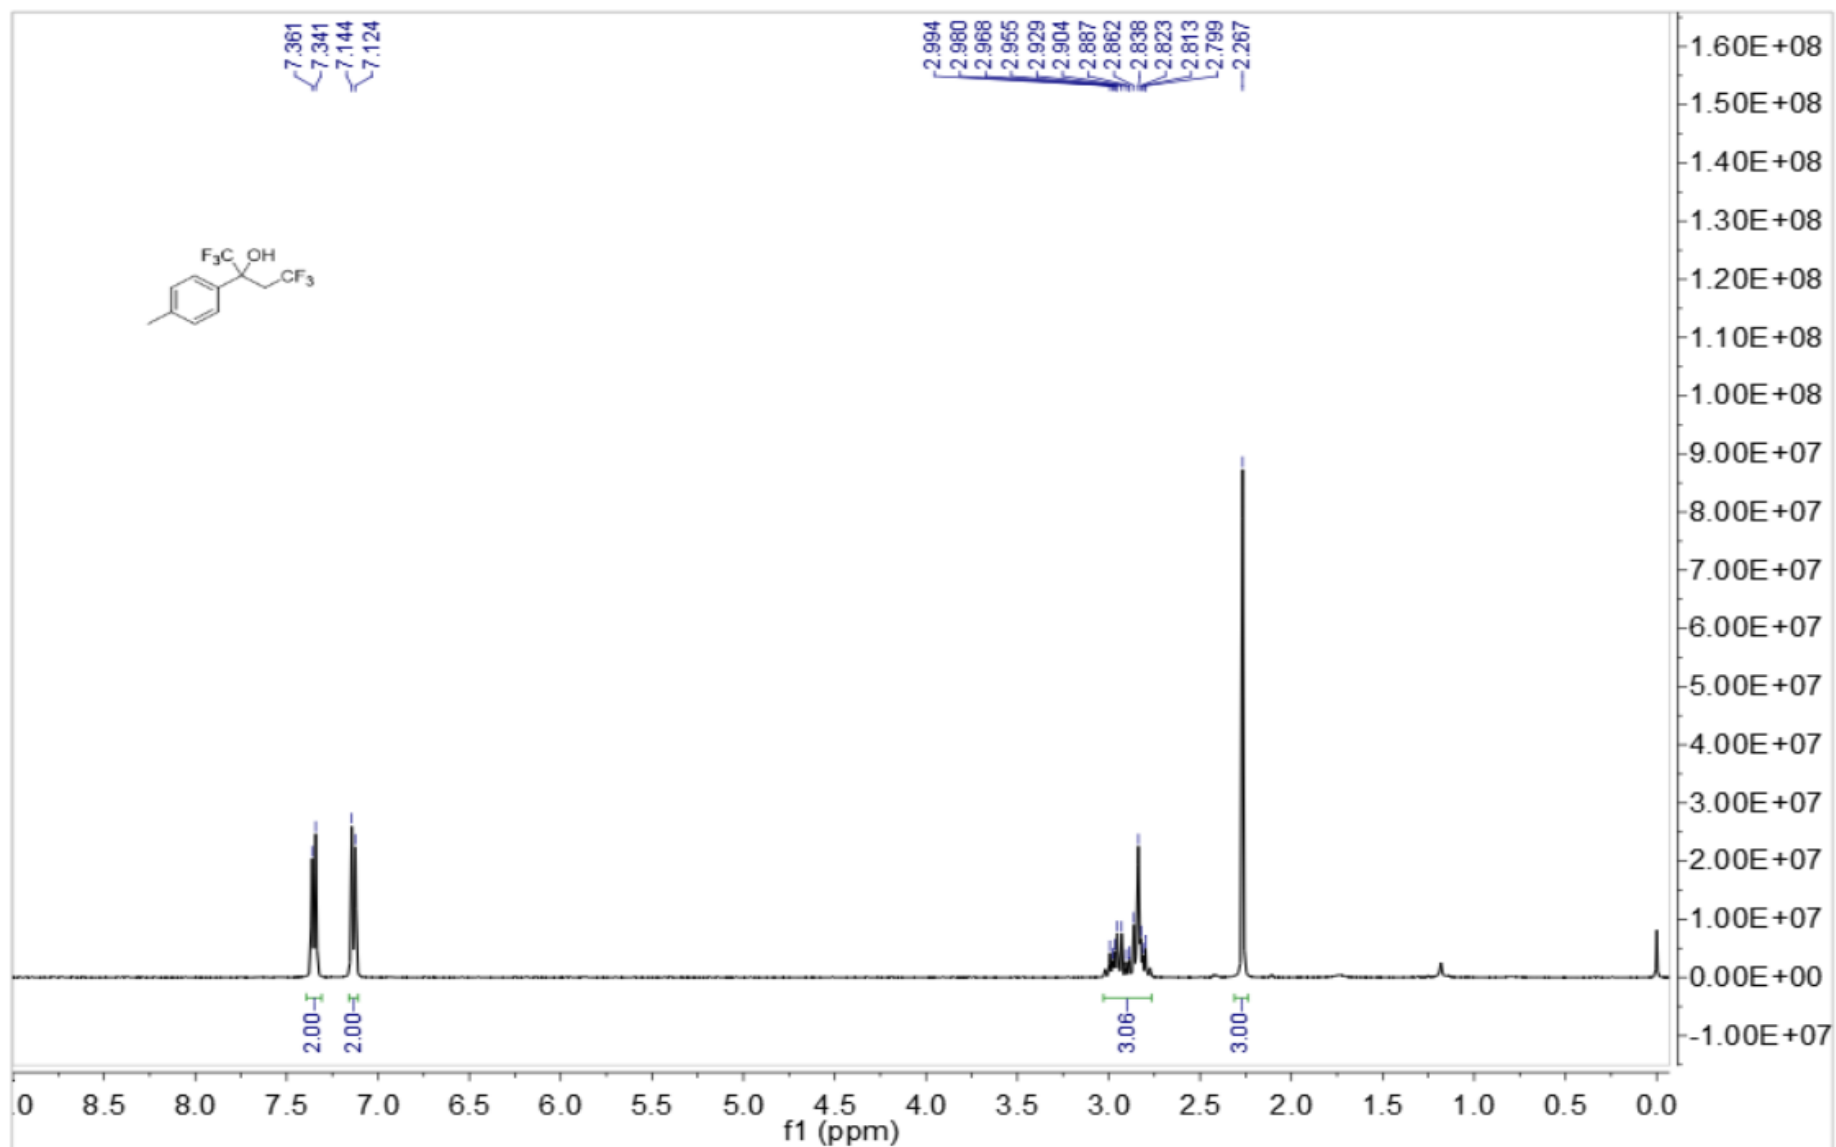

<sup>13</sup>C NMR spectrum of 2c

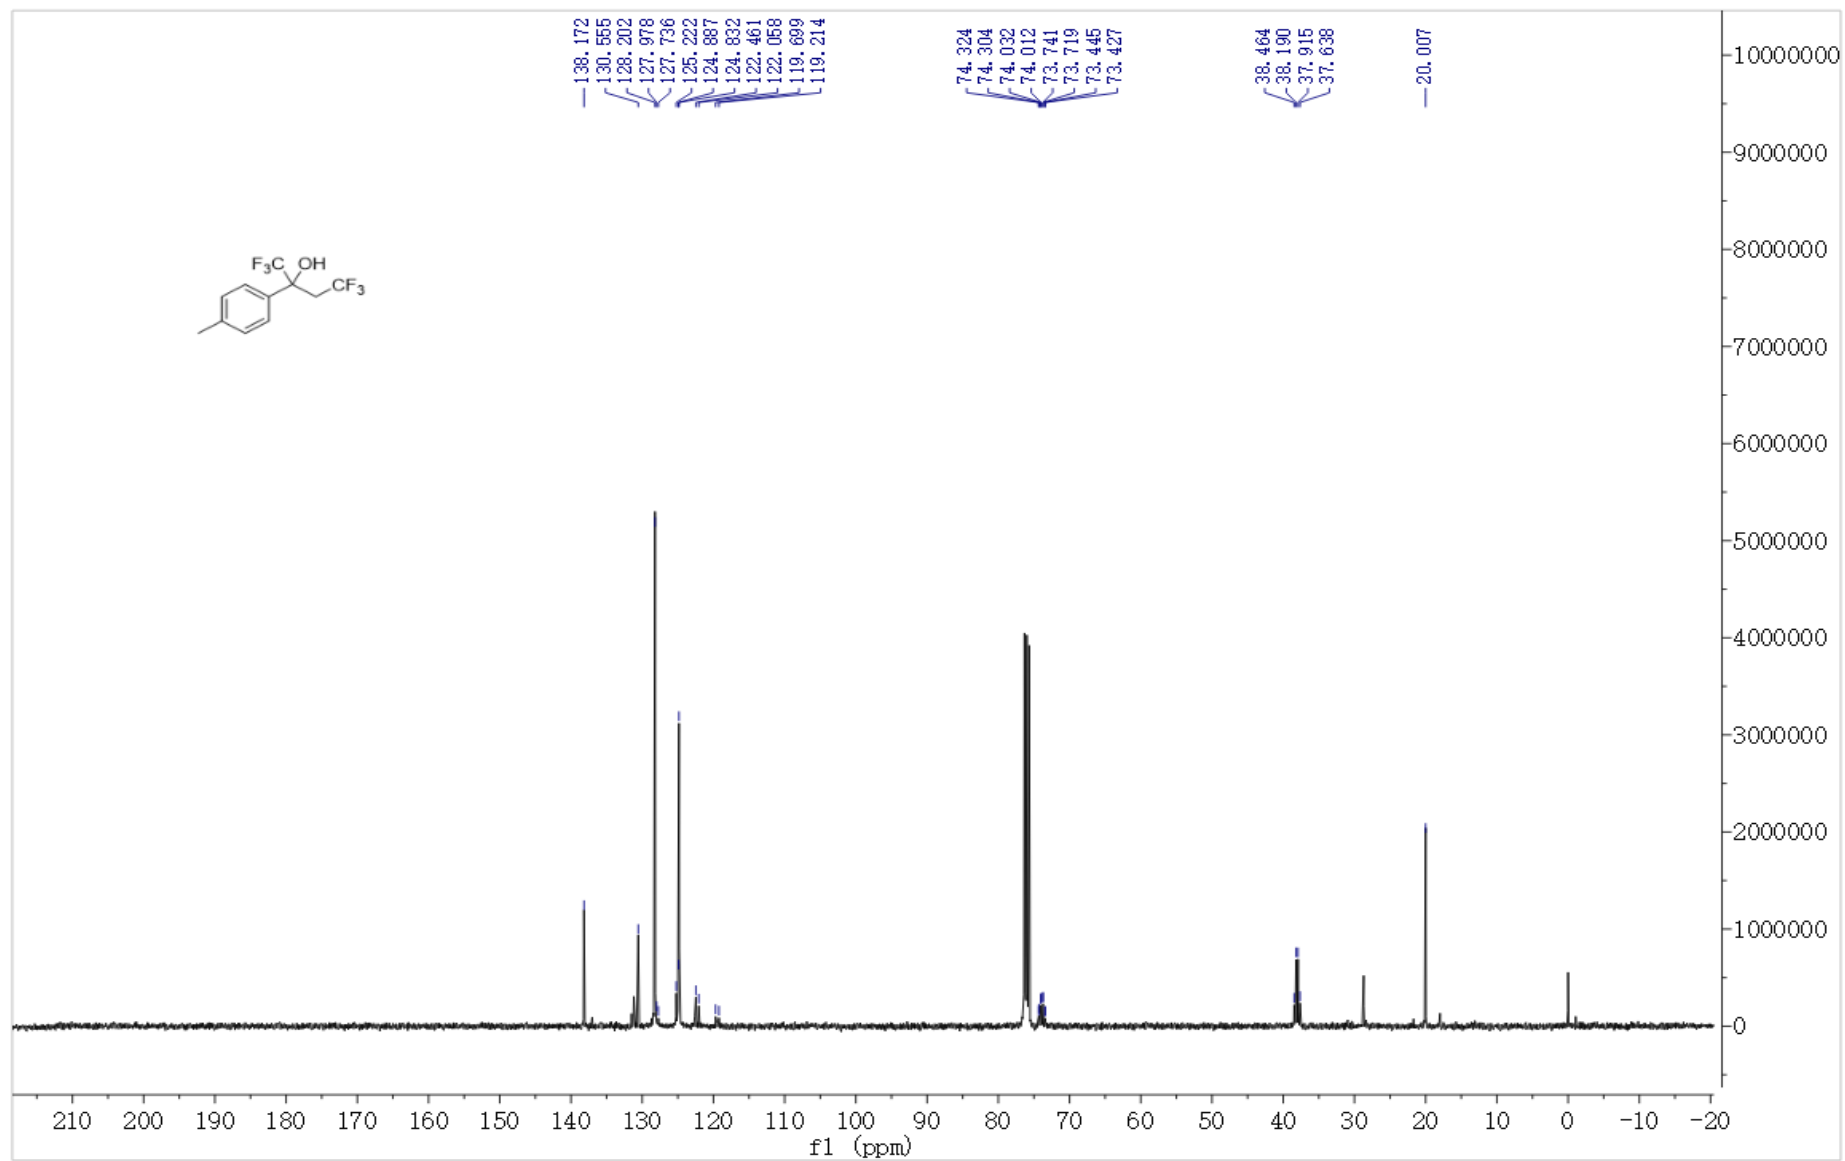

**<sup>19</sup>F NMR spectrum of 2c**

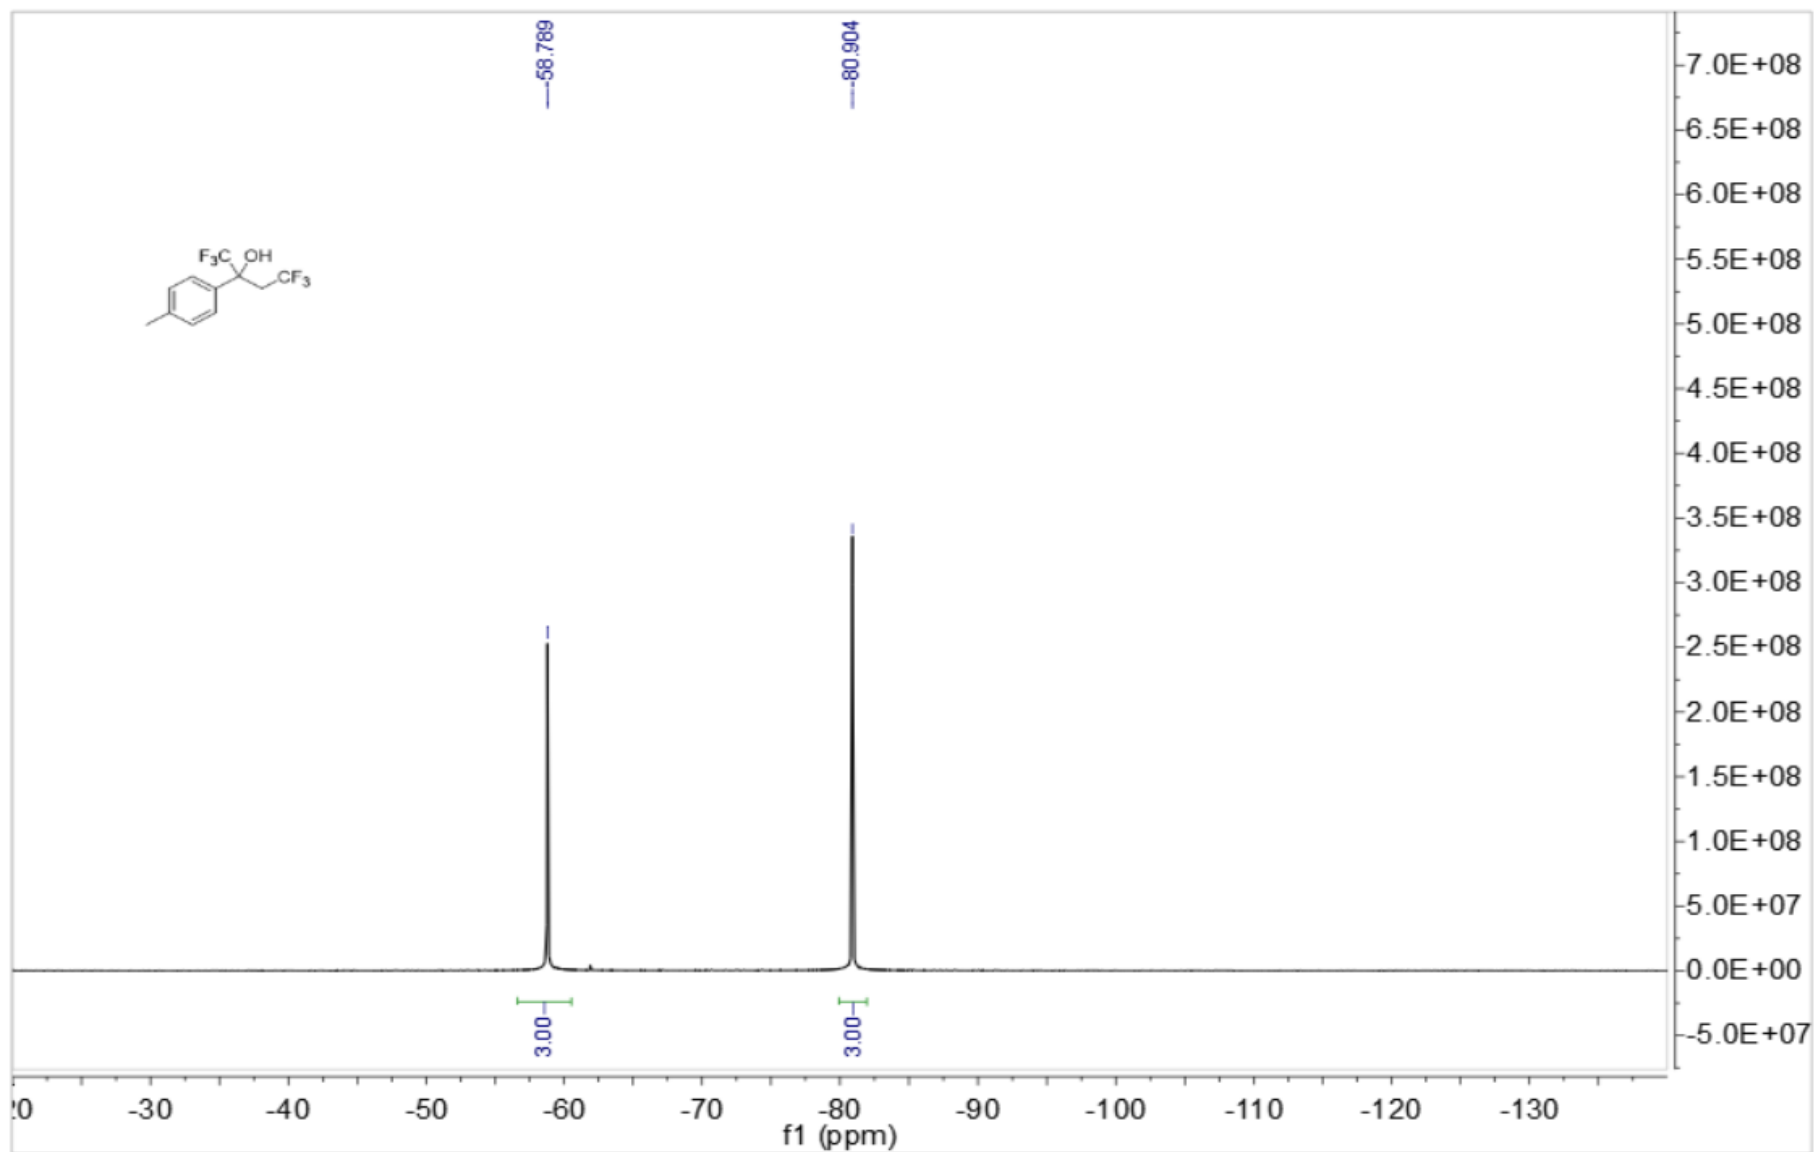

HRMS (EI) spectrum of 2c

CS-LC-P-272

20220484 311 (5.185) Cm (311-22:26)

Waters GCT Premier

TOF MS EI+  
2.05e4

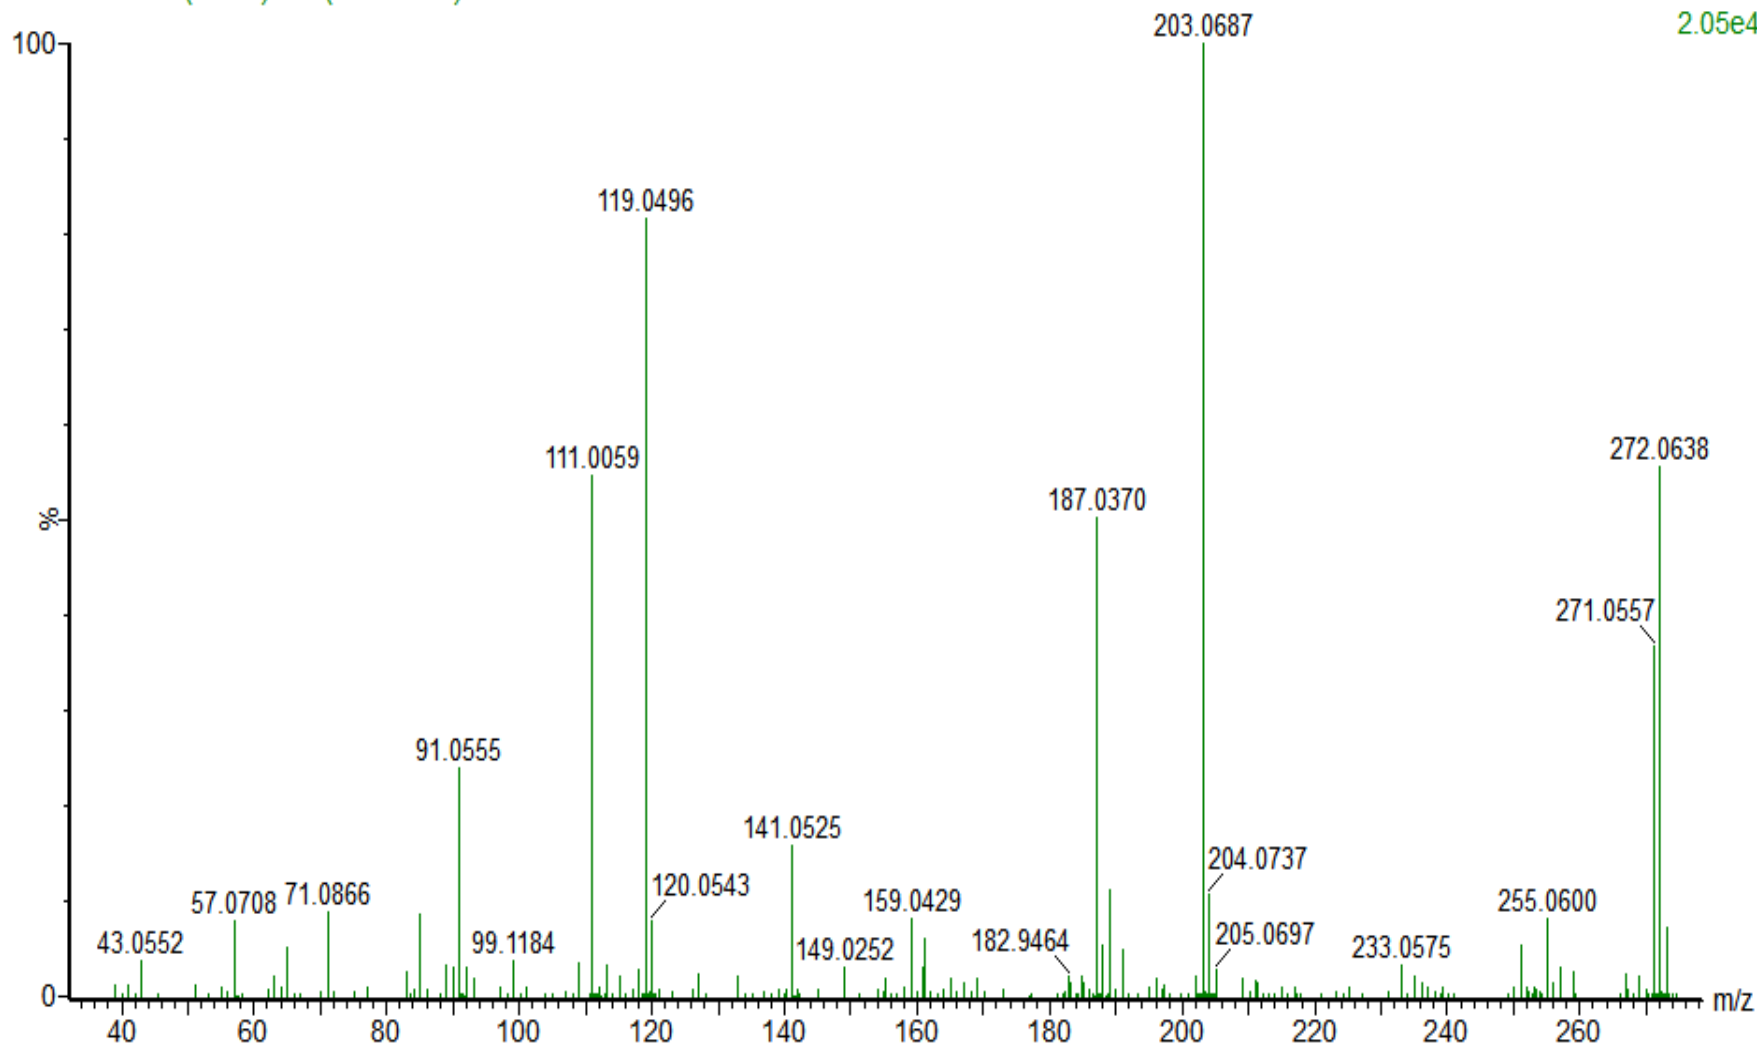

<sup>1</sup>H NMR spectrum of 2d

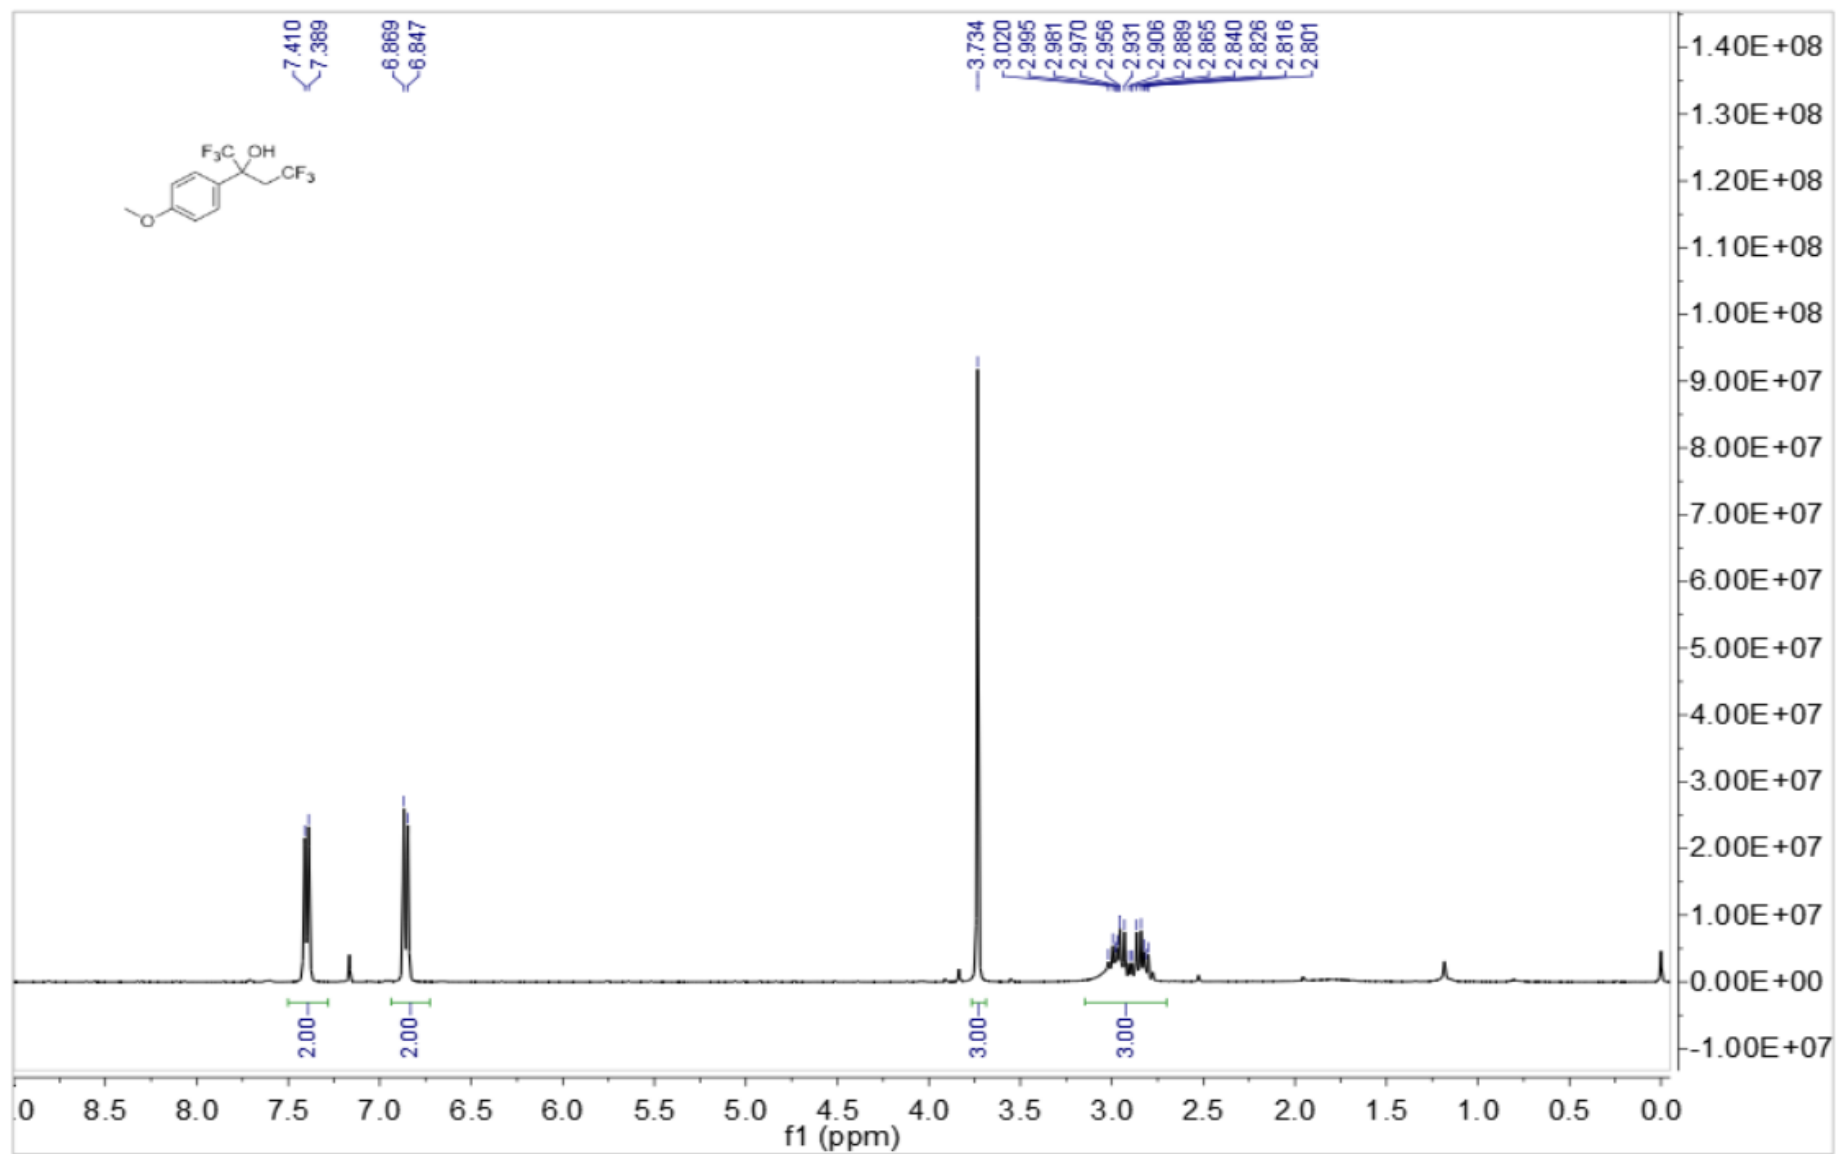

<sup>13</sup>C NMR spectrum of 2d

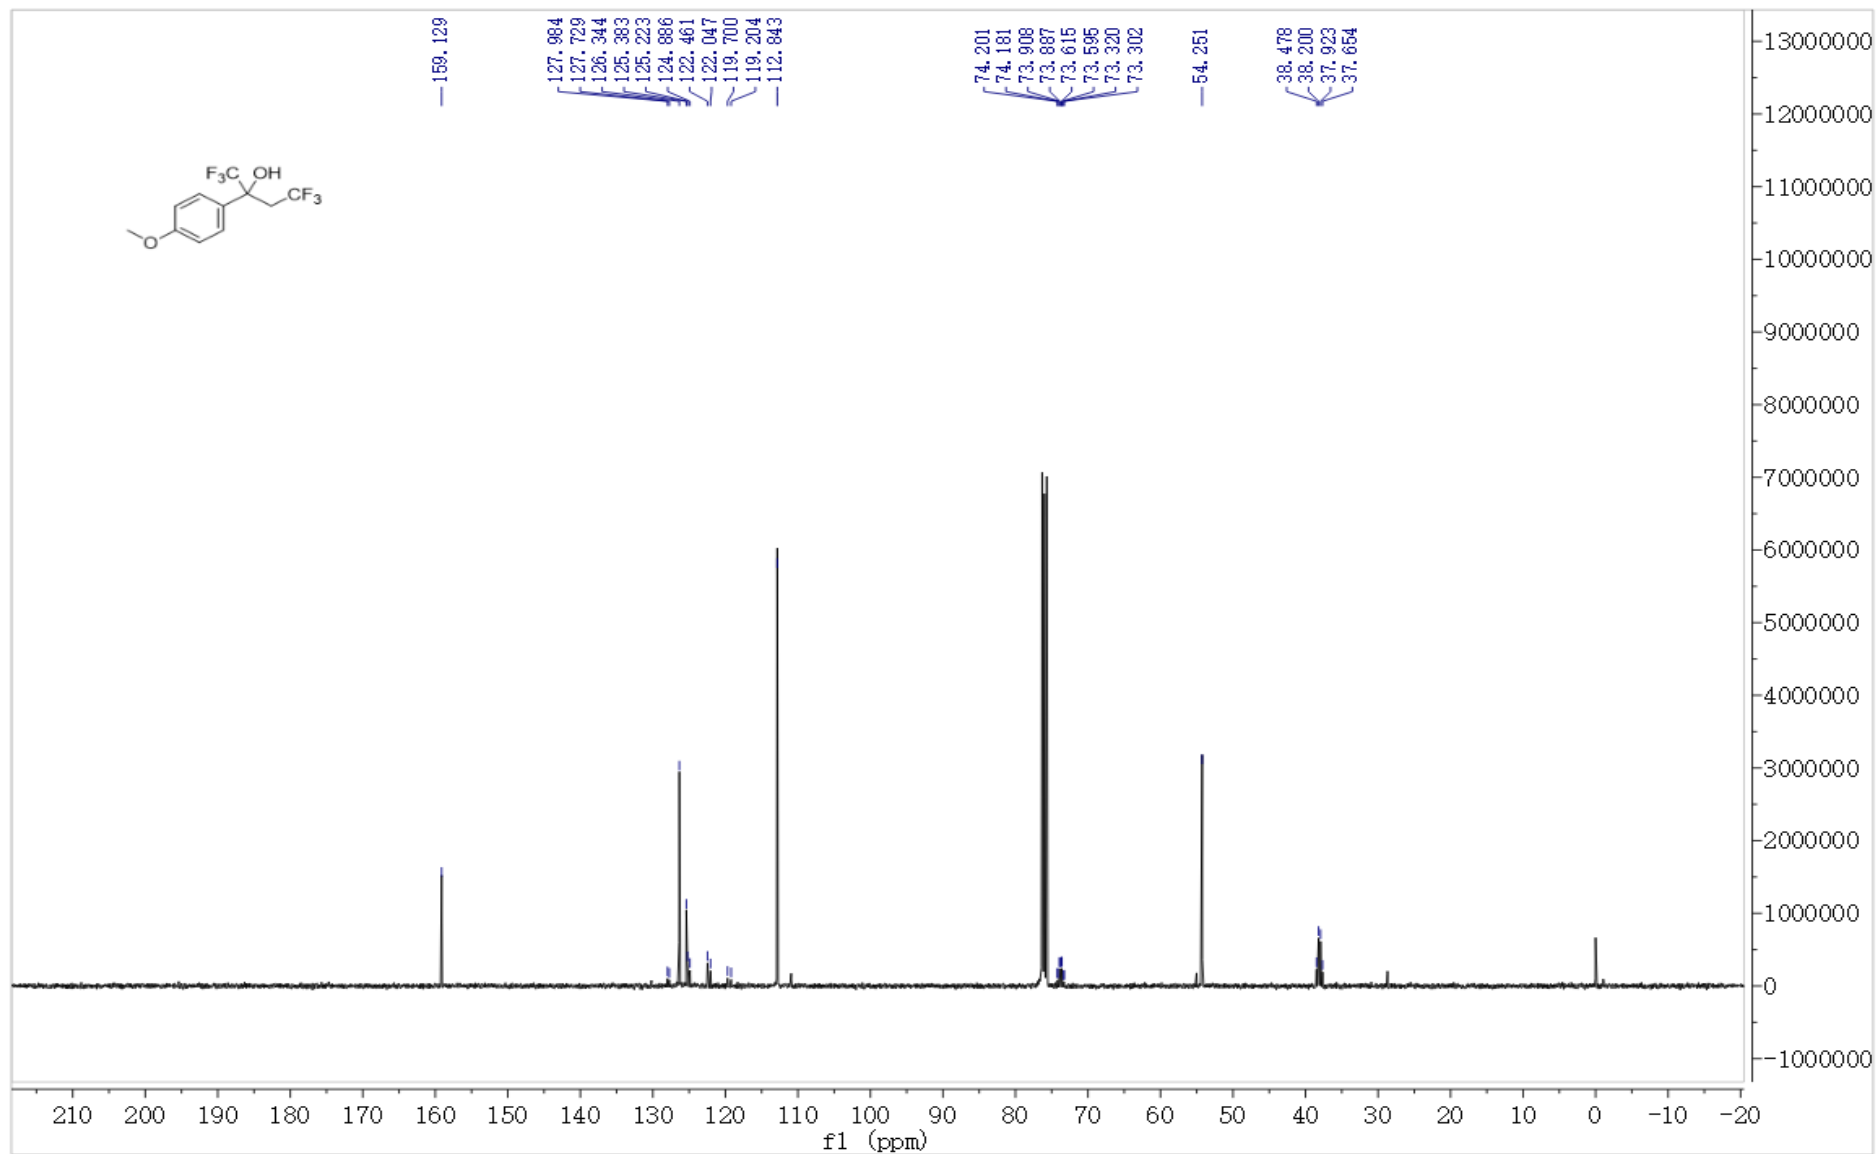



**<sup>19</sup>F NMR spectrum of 2d**

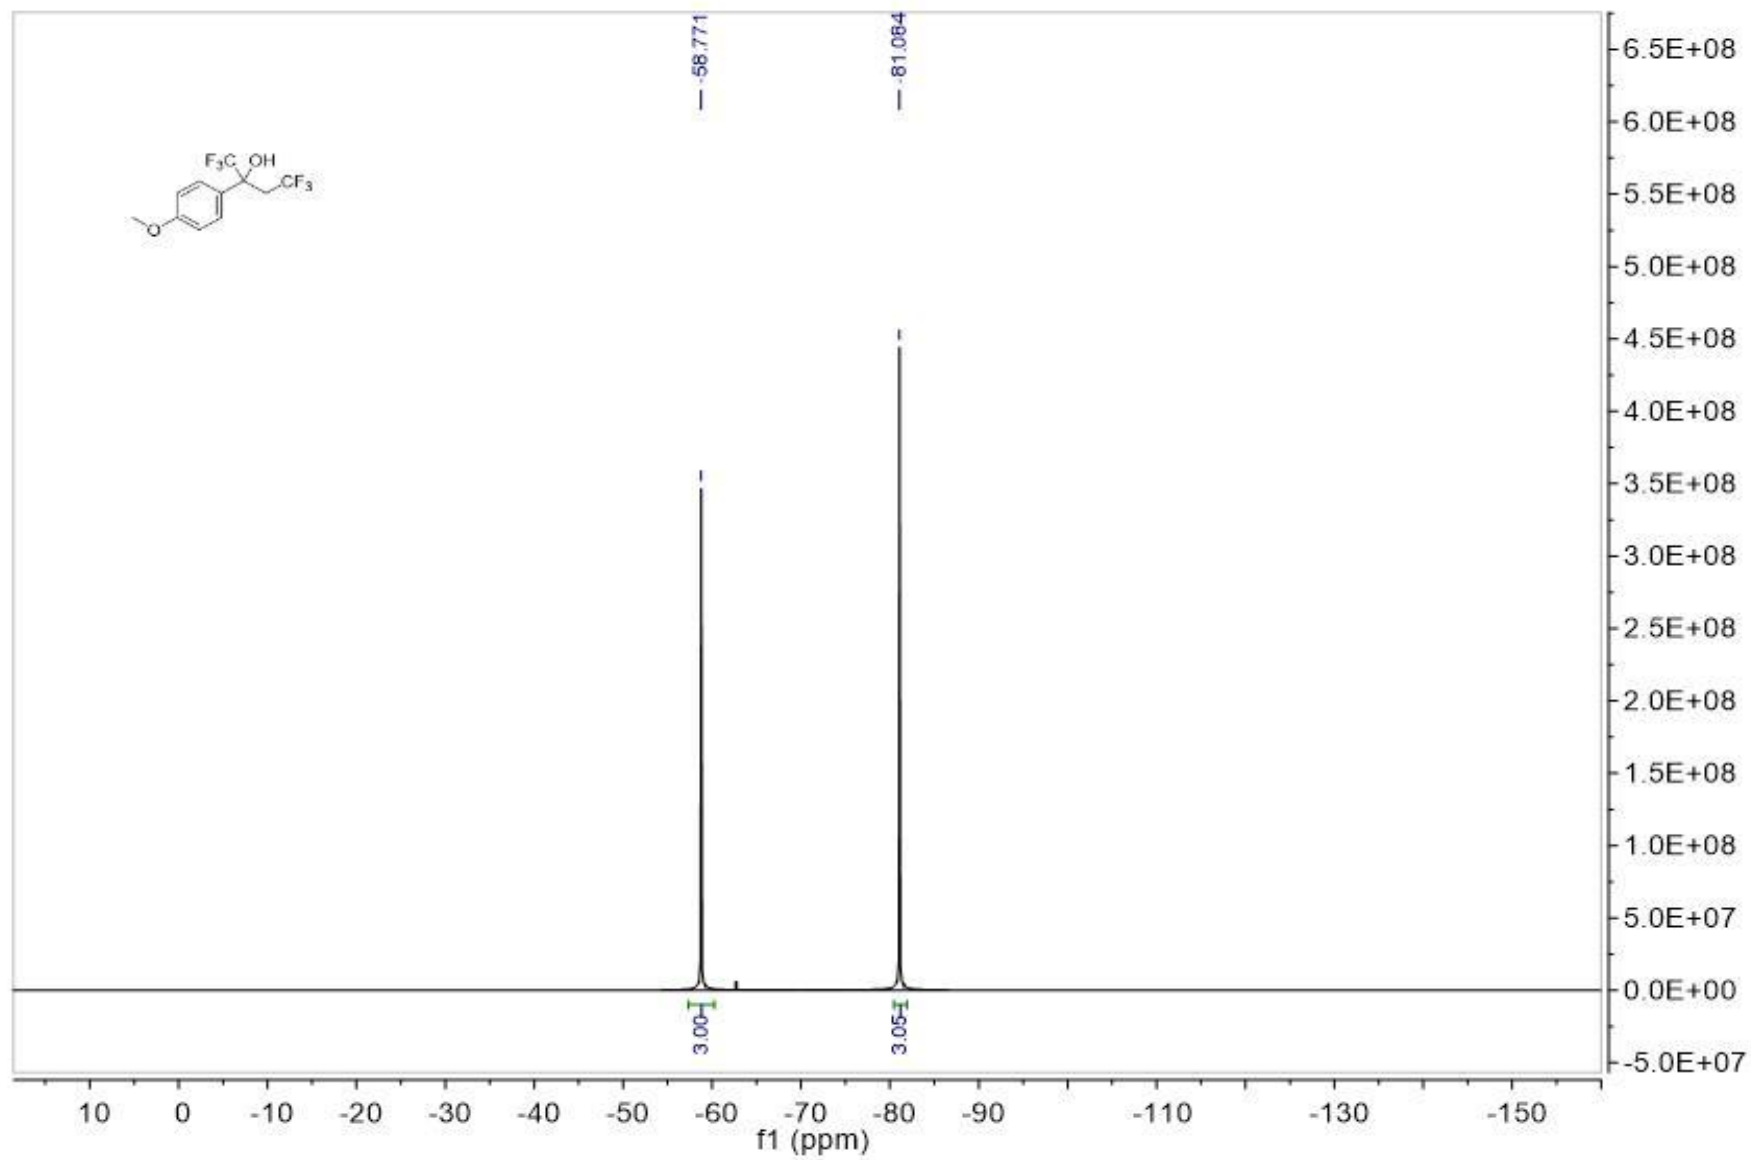

HRMS (EI) spectrum of 2d

CS-LC-P-288

Waters GCT Premier

20220310 121 (2.017) Cm (121-(33+34))

TOF MS EI+  
1.70e4

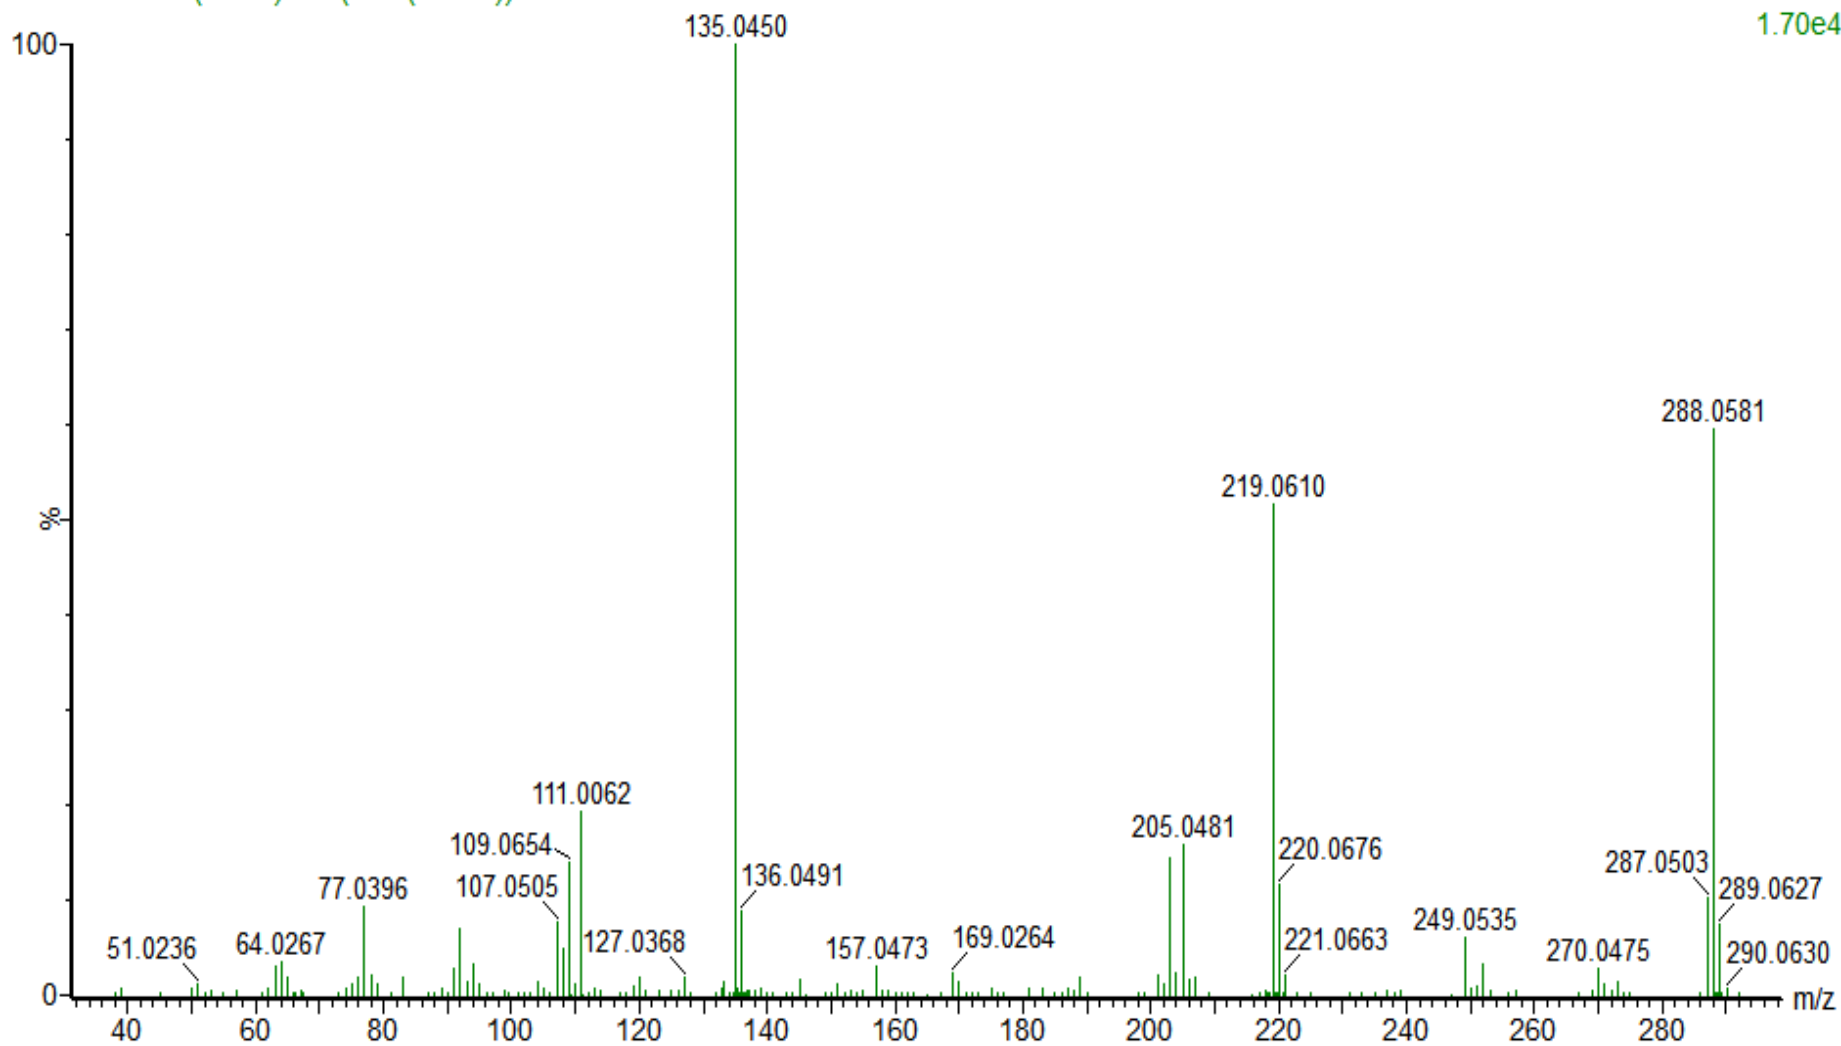

# <sup>1</sup>H NMR spectrum of 2e

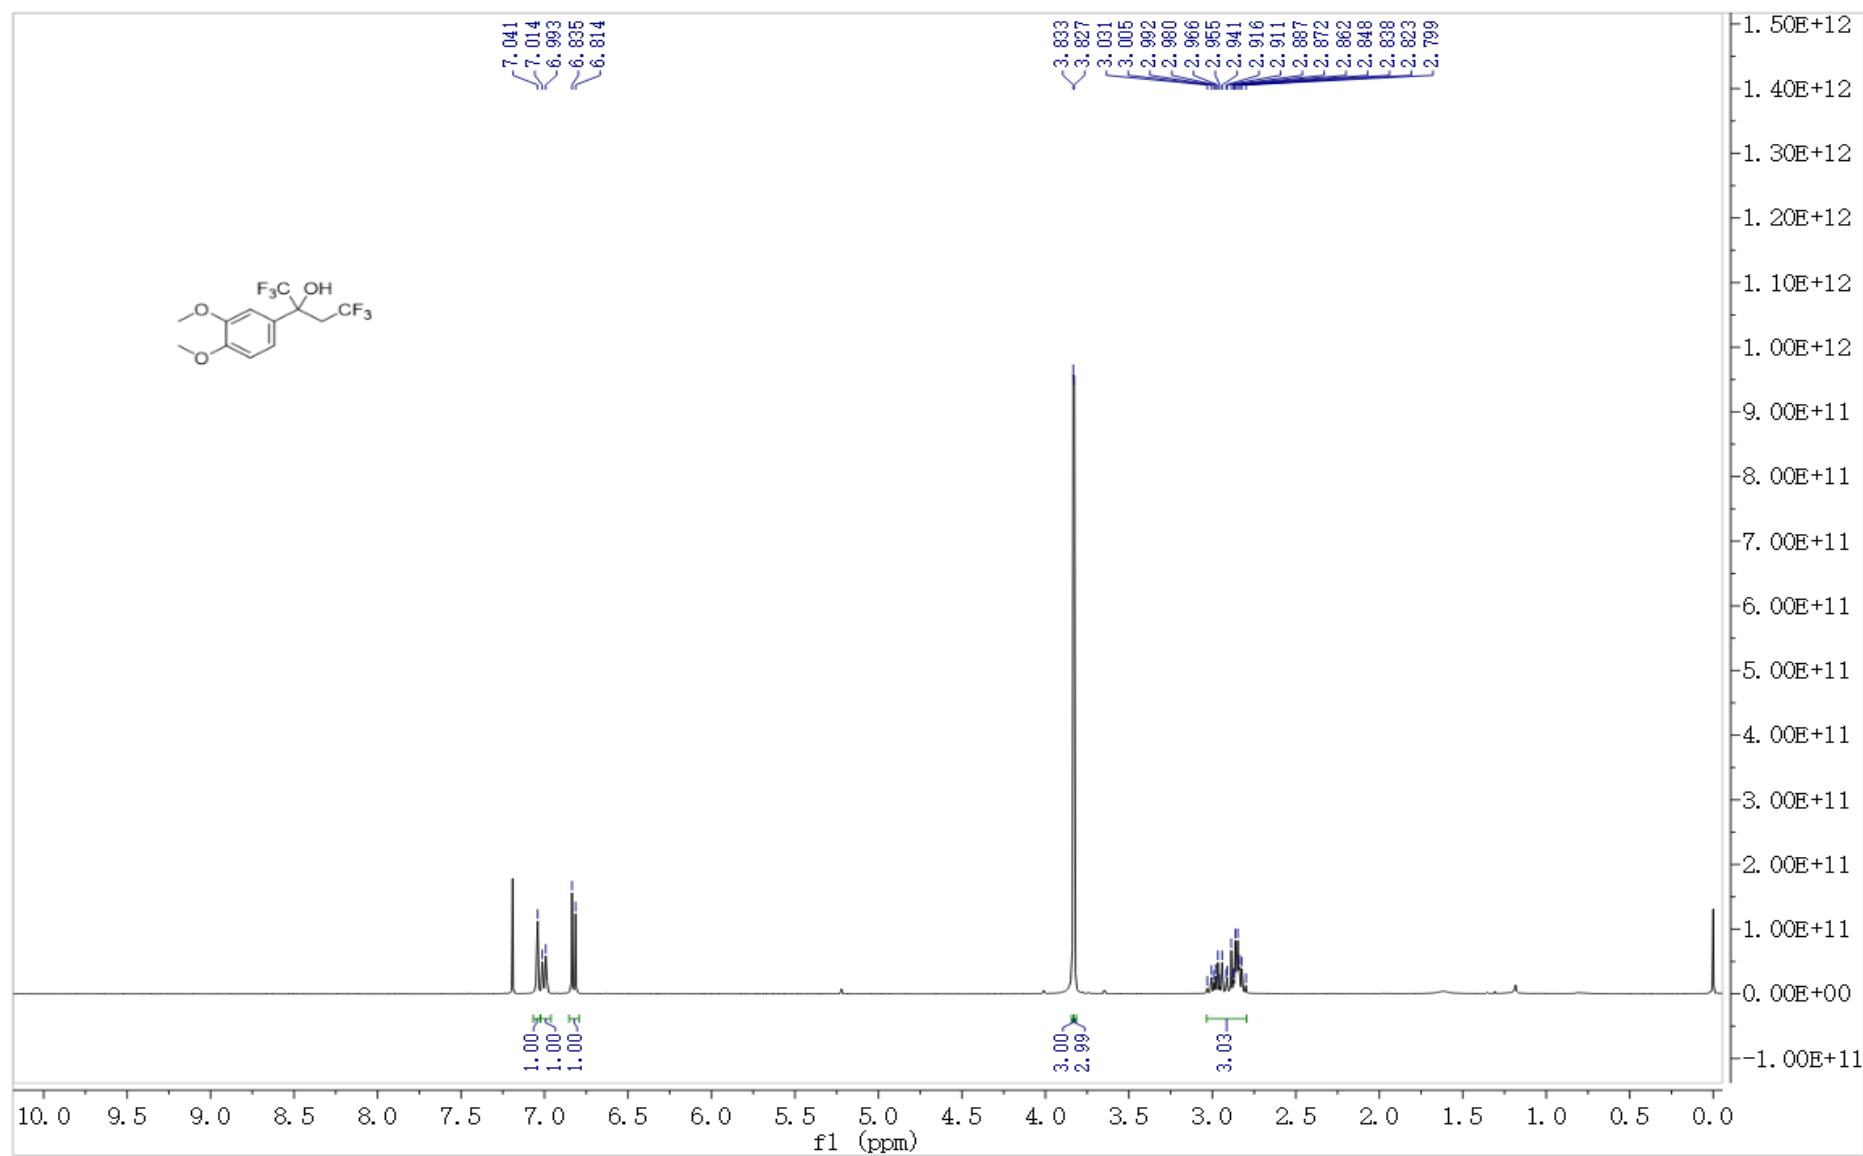

<sup>13</sup>C NMR spectrum of 2e

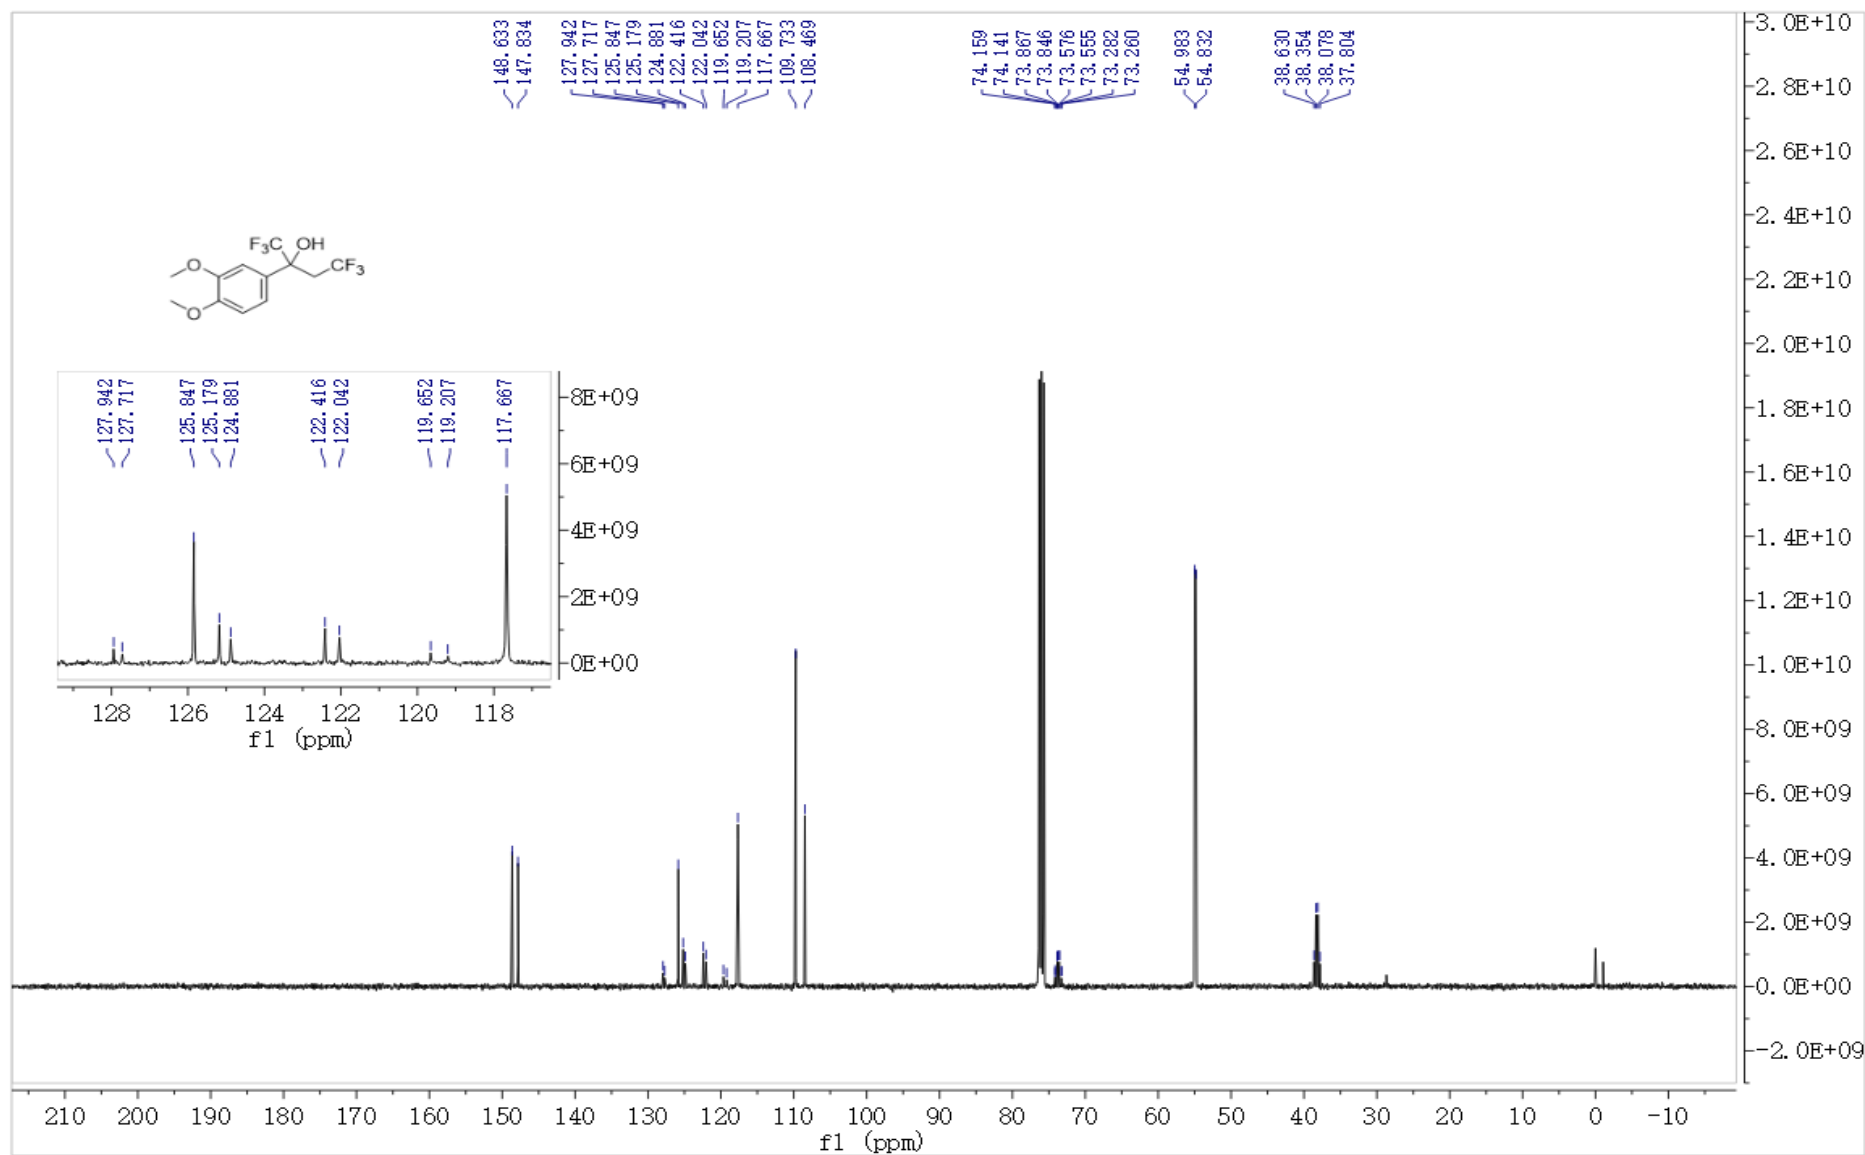

**<sup>19</sup>F NMR spectrum of 2e**

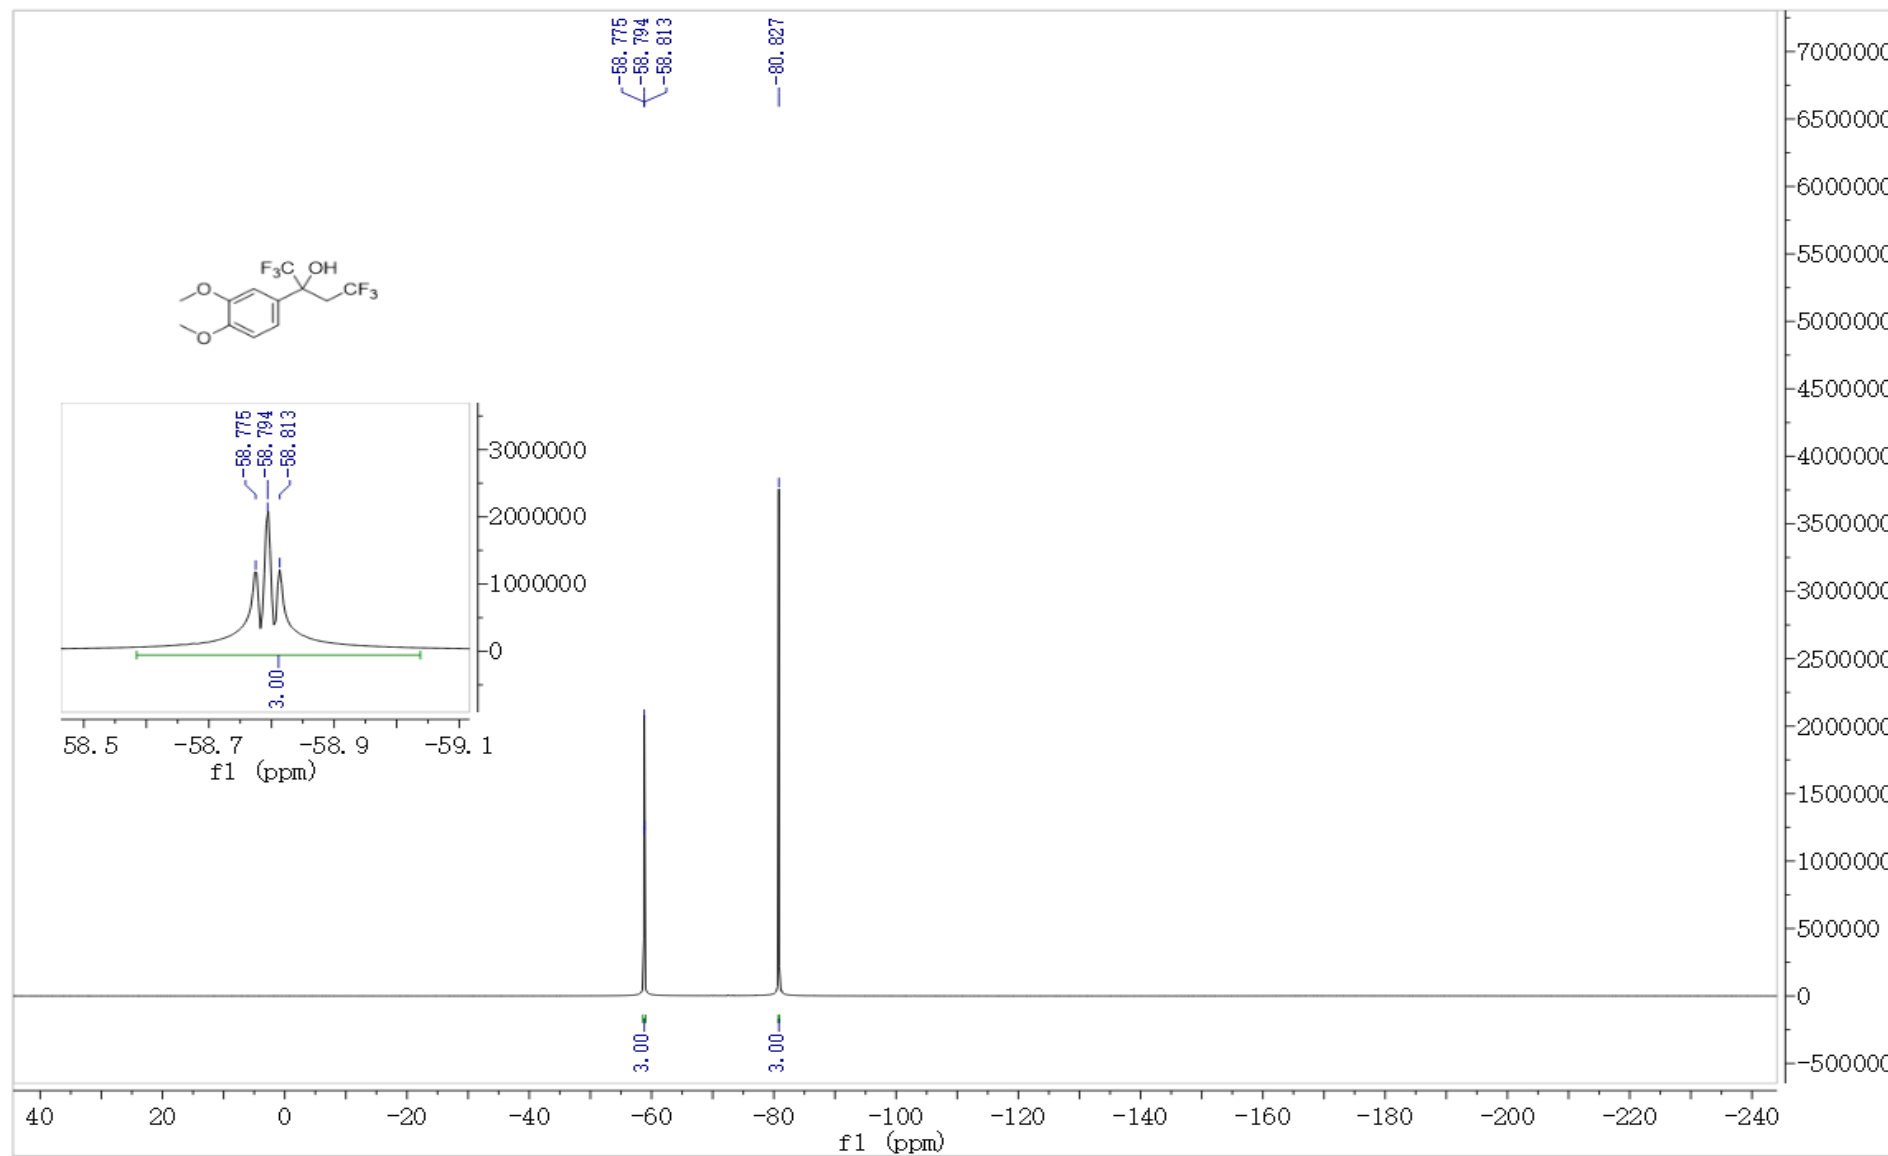

HRMS (EI) spectrum of 2e

CS-LC-318

20220307 172 (2.867) Cm (172-(13+22))

Waters GCT Premier

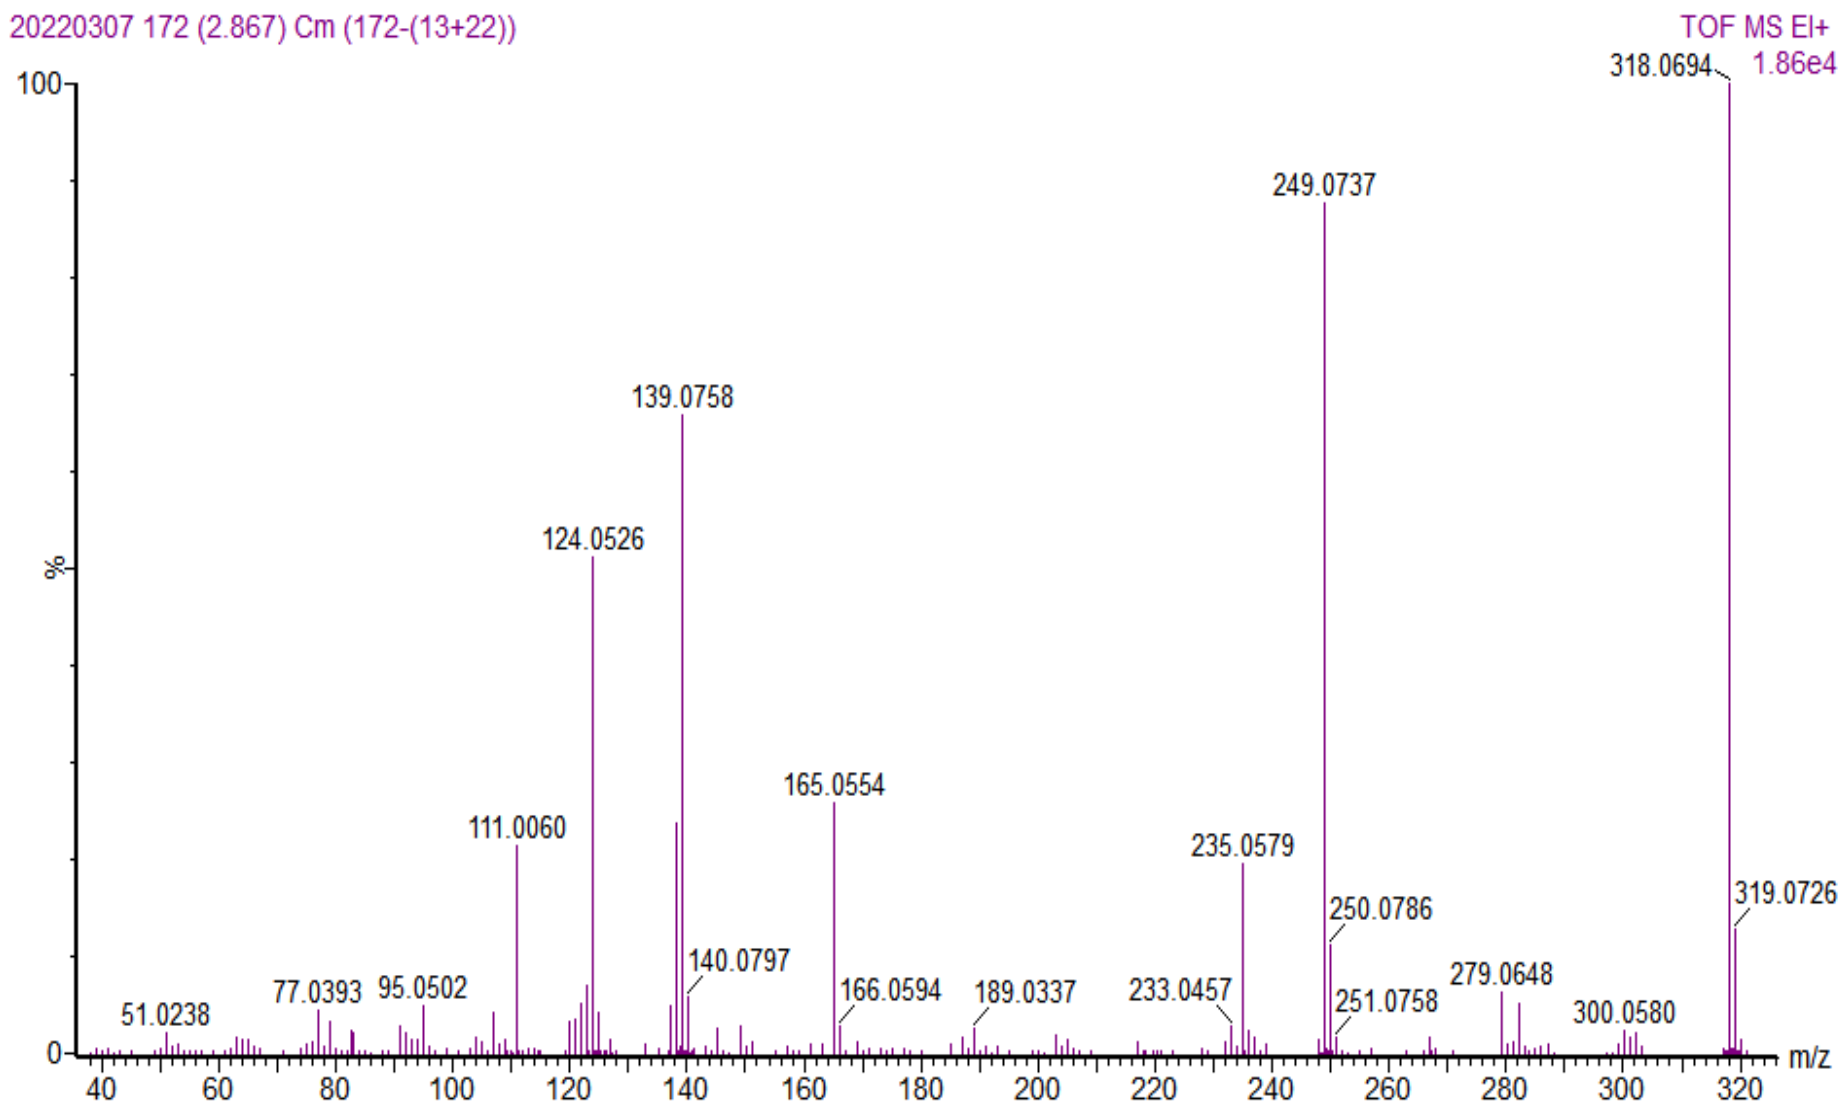

<sup>1</sup>H NMR spectrum of 2f

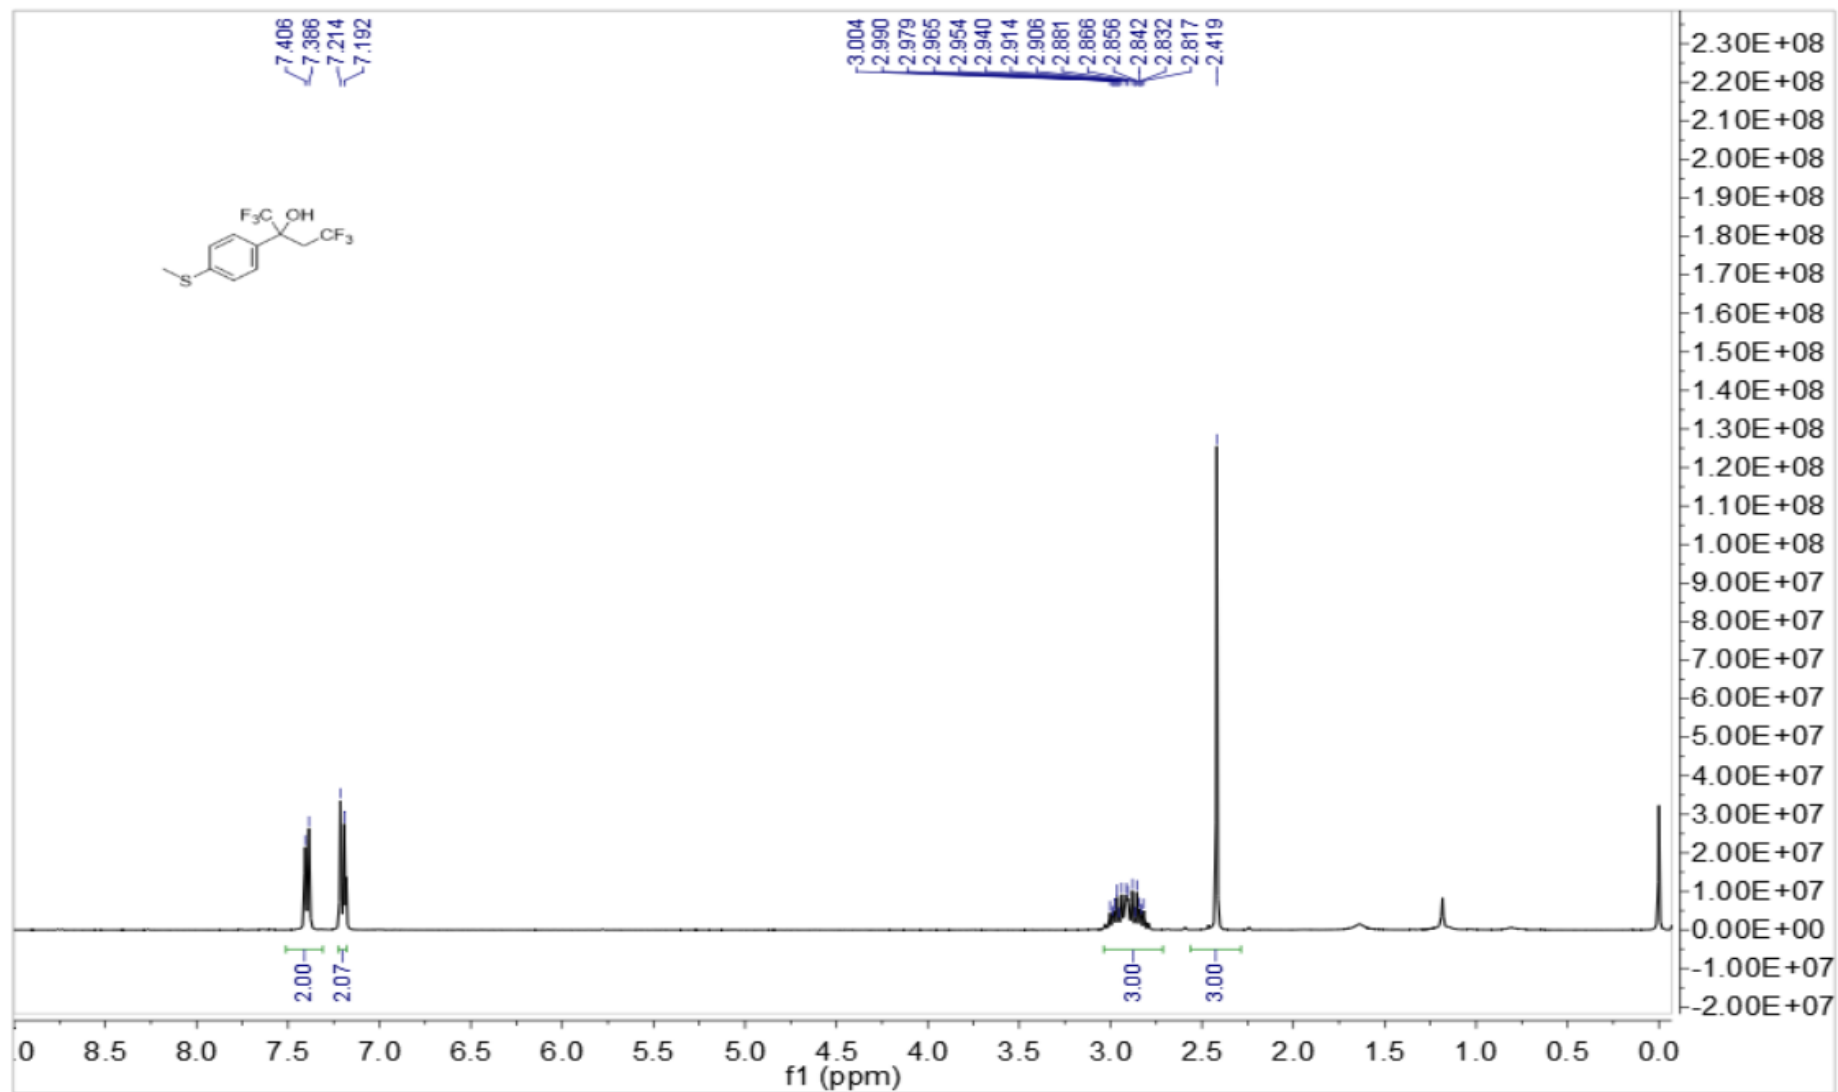

<sup>13</sup>C NMR spectrum of 2f

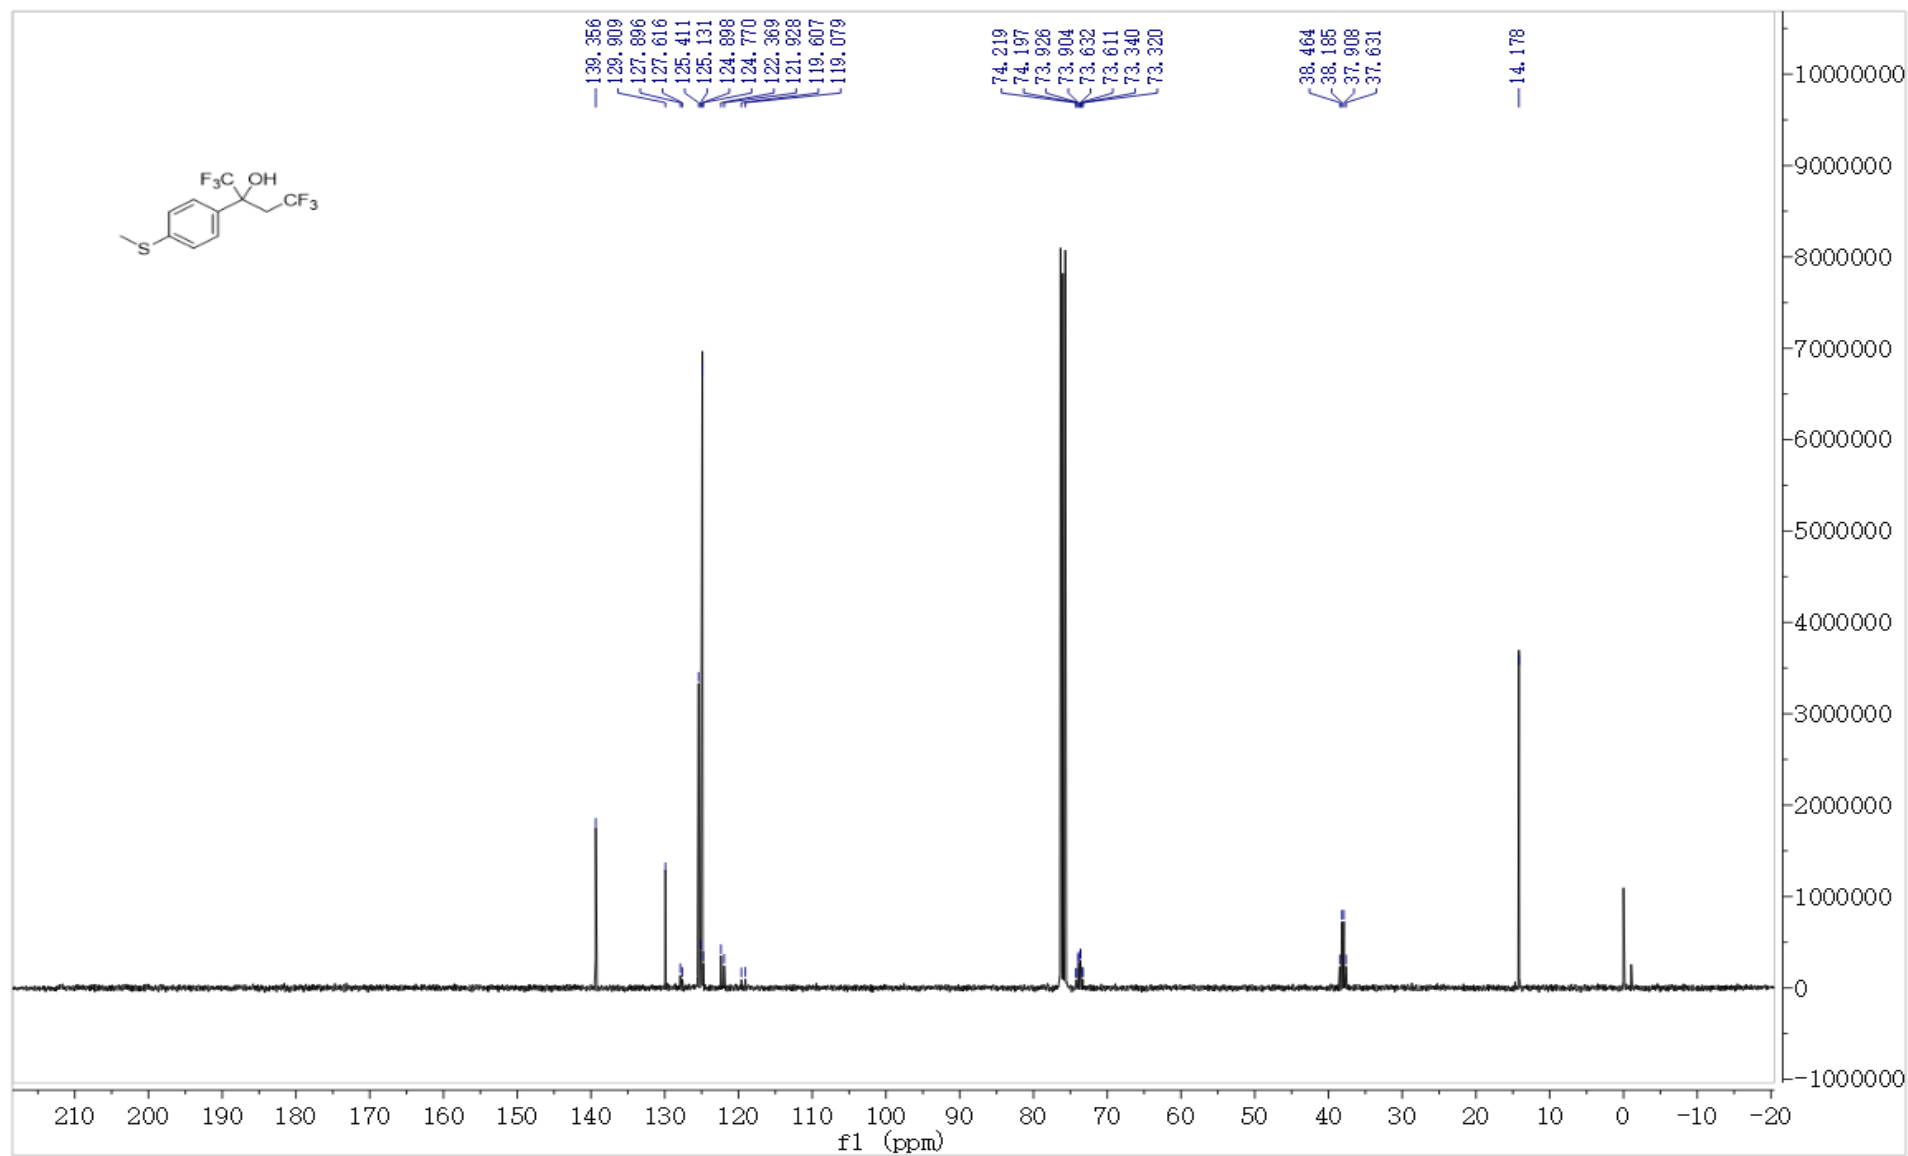



**<sup>19</sup>F NMR spectrum of 2f**

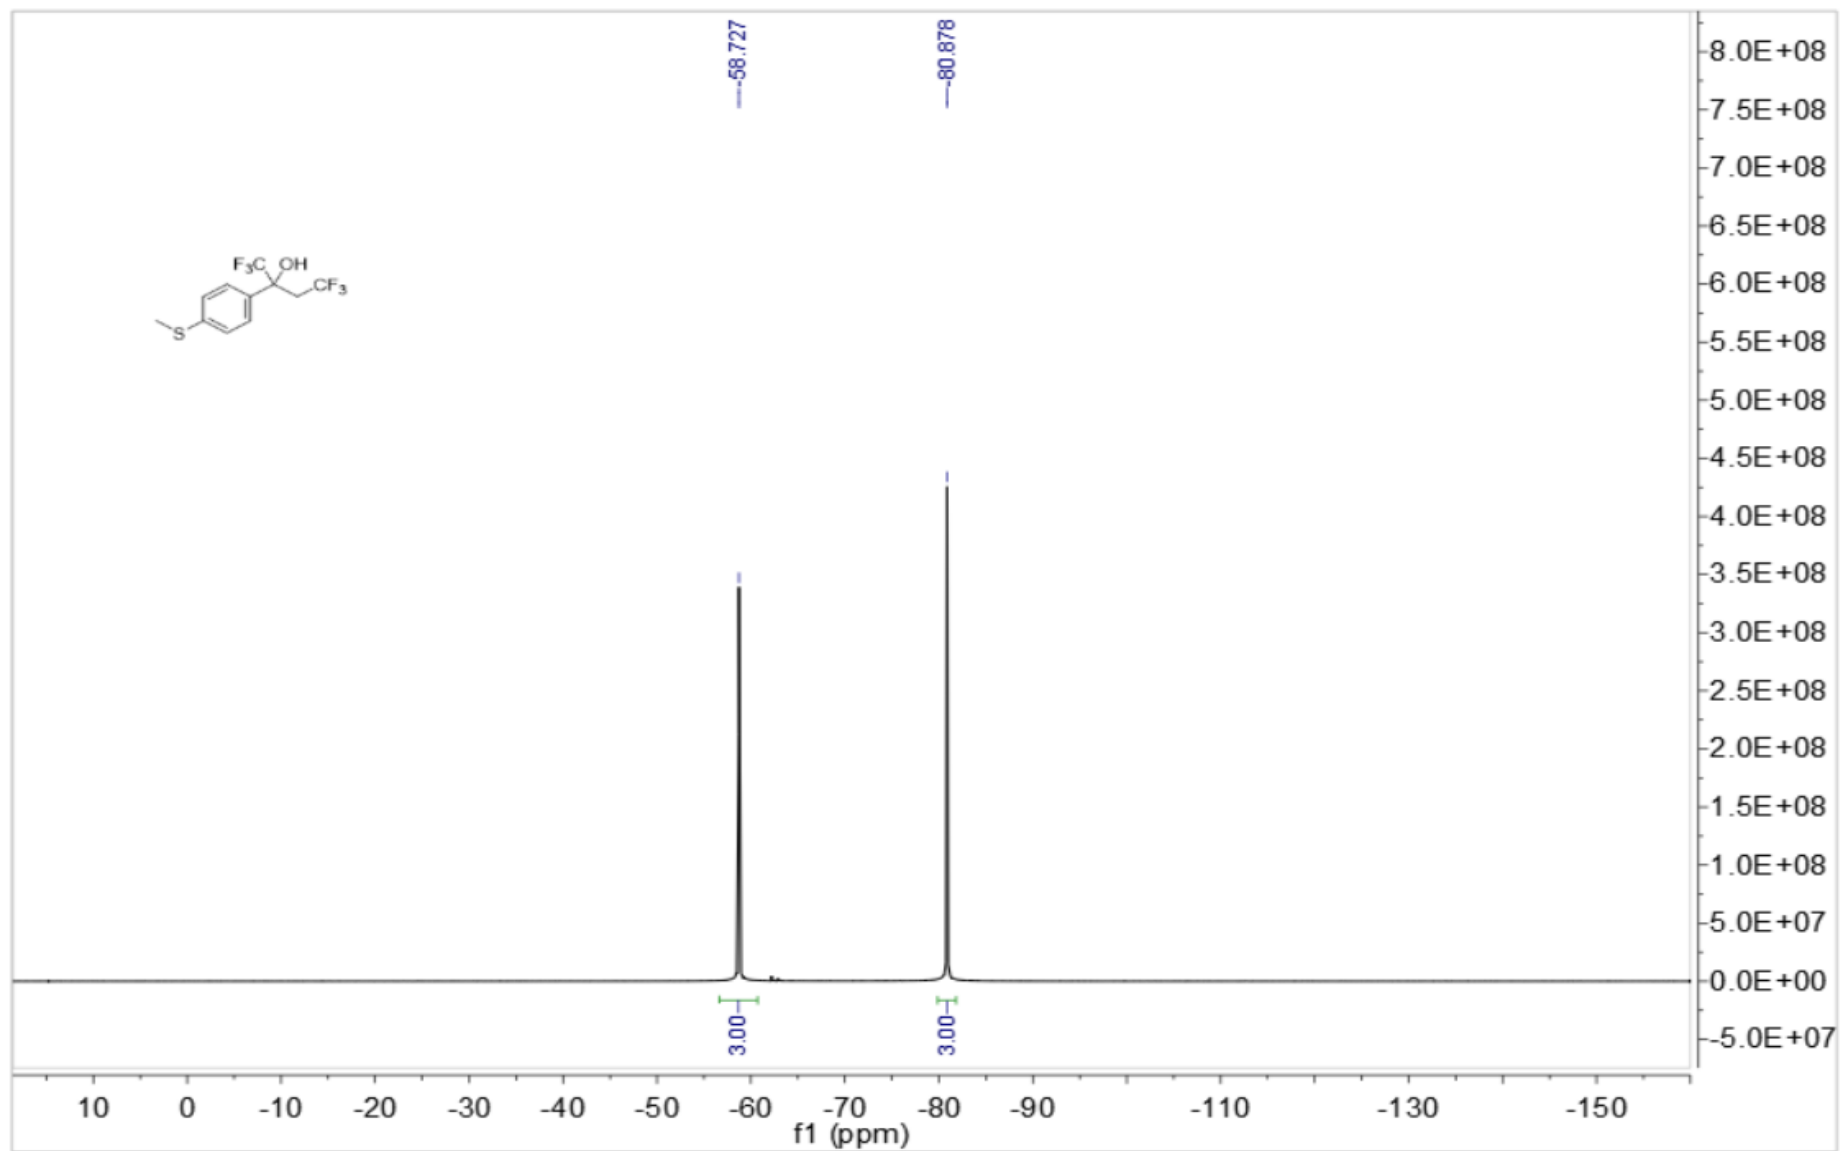

HRMS (EI) spectrum of 2f

CS-LC-P-304

Waters GCT Premier

20220301 76 (1.267) Cm (76-(14+151))

TOF MS EI+  
1.85e4

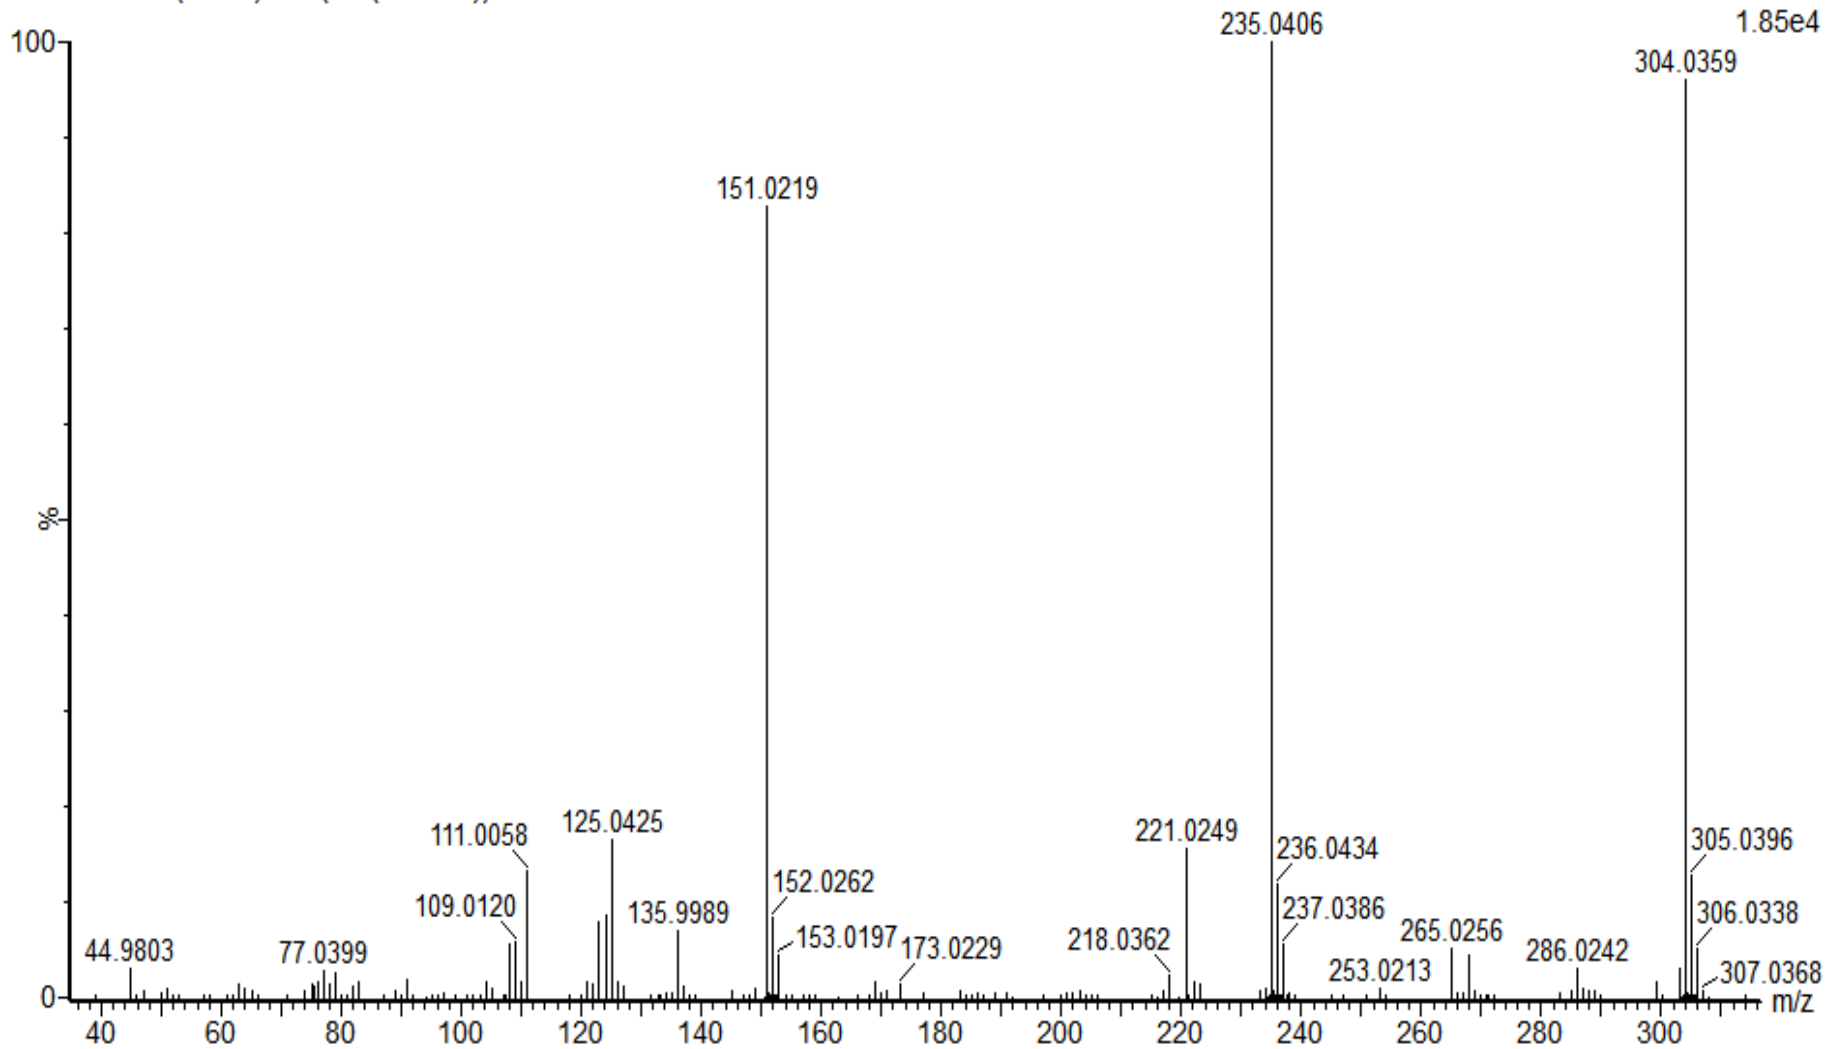

<sup>1</sup>H NMR spectrum of 2g

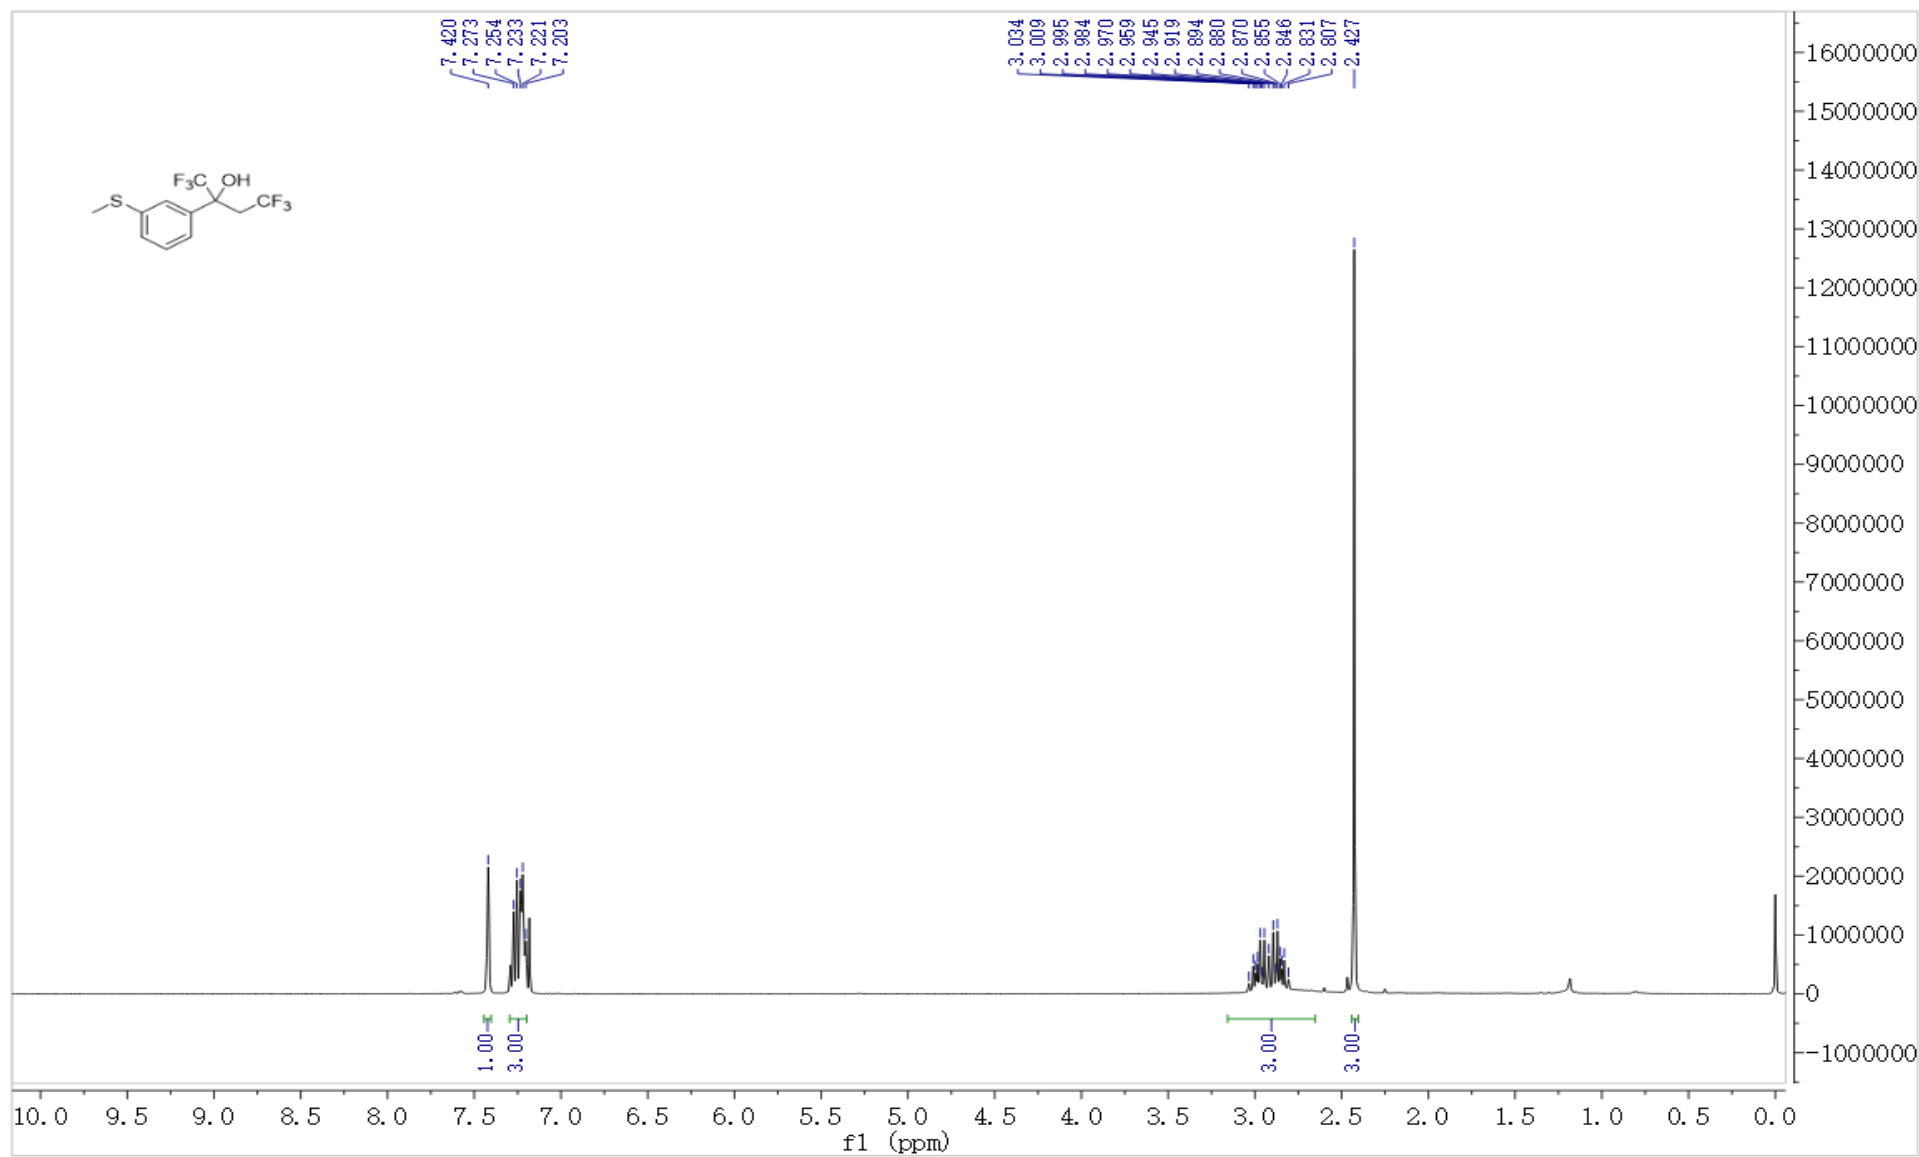

<sup>13</sup>C NMR spectrum of 2g

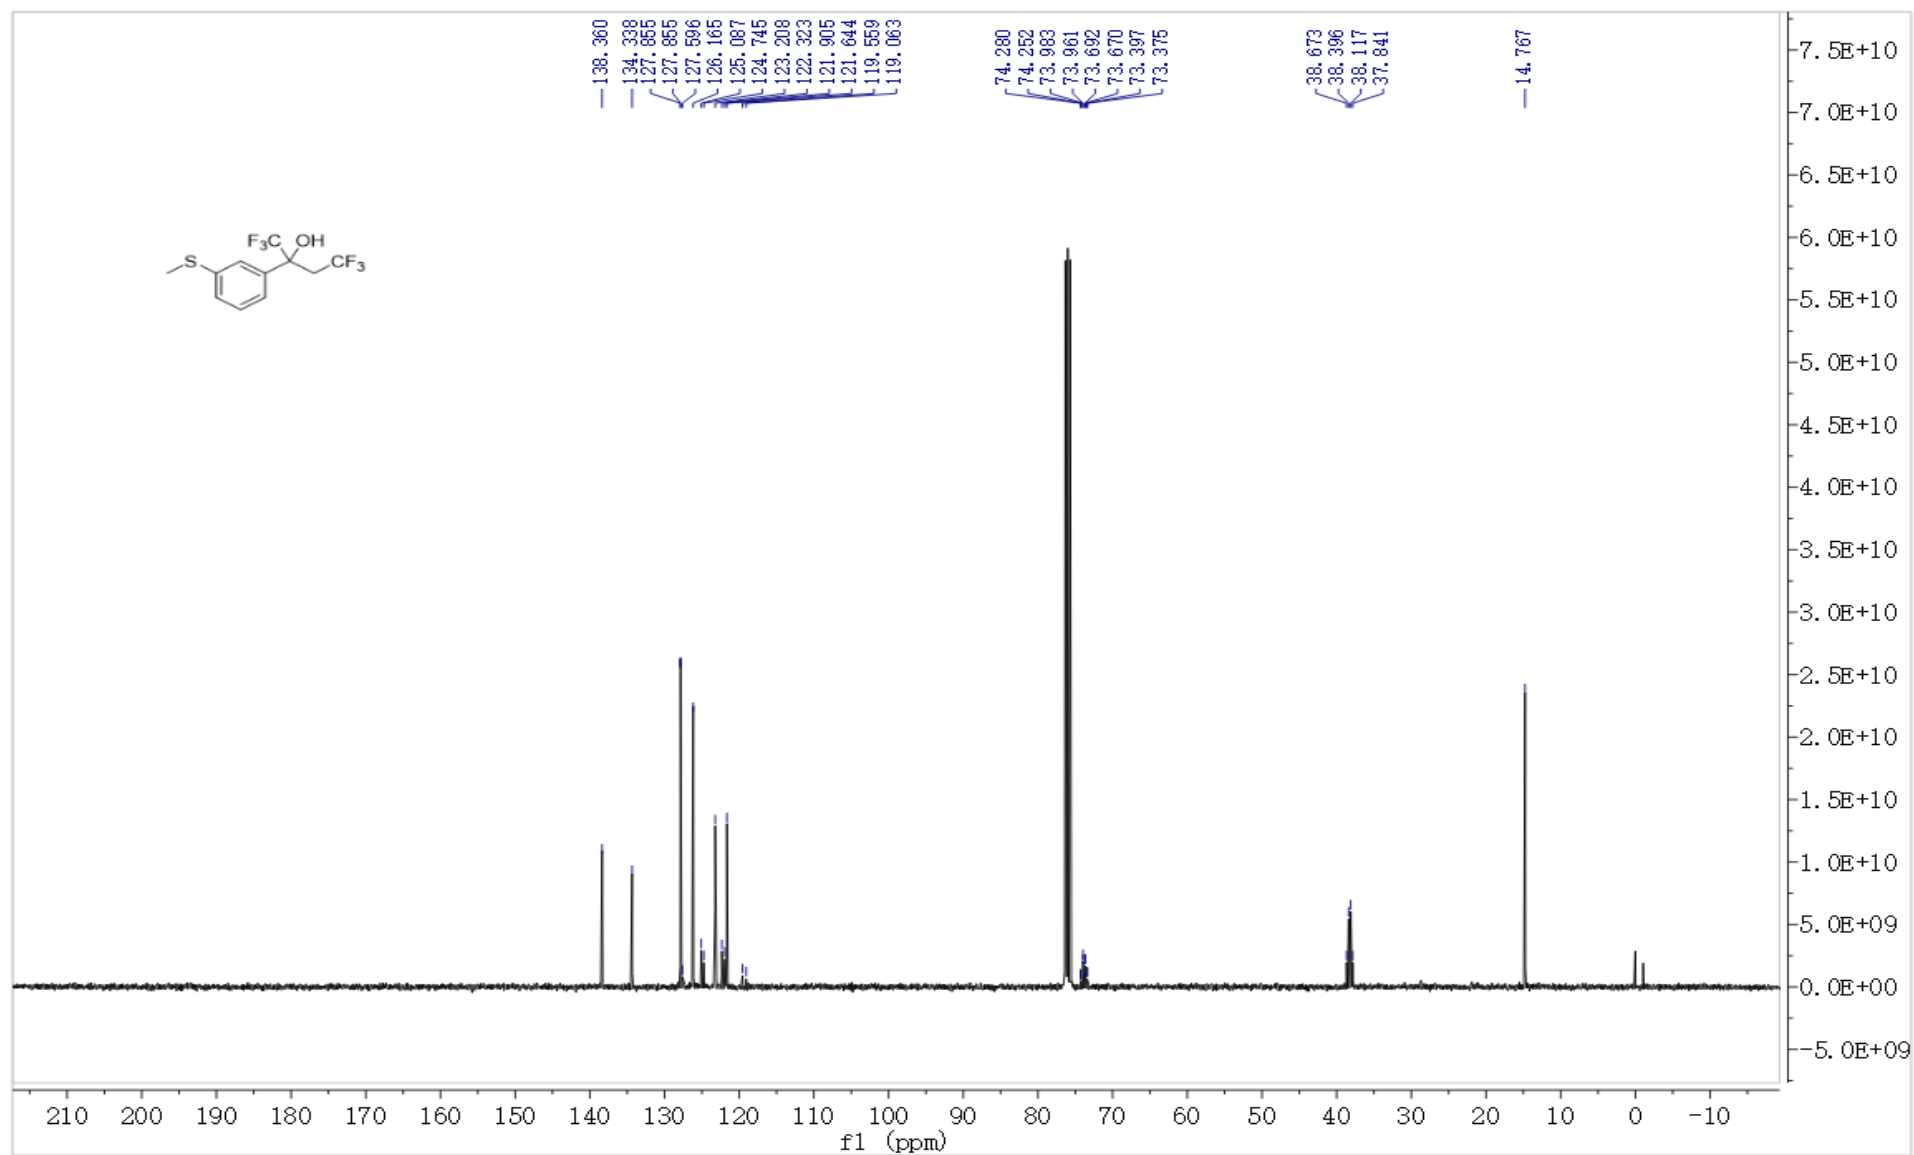

**<sup>19</sup>F NMR spectrum of 2g**

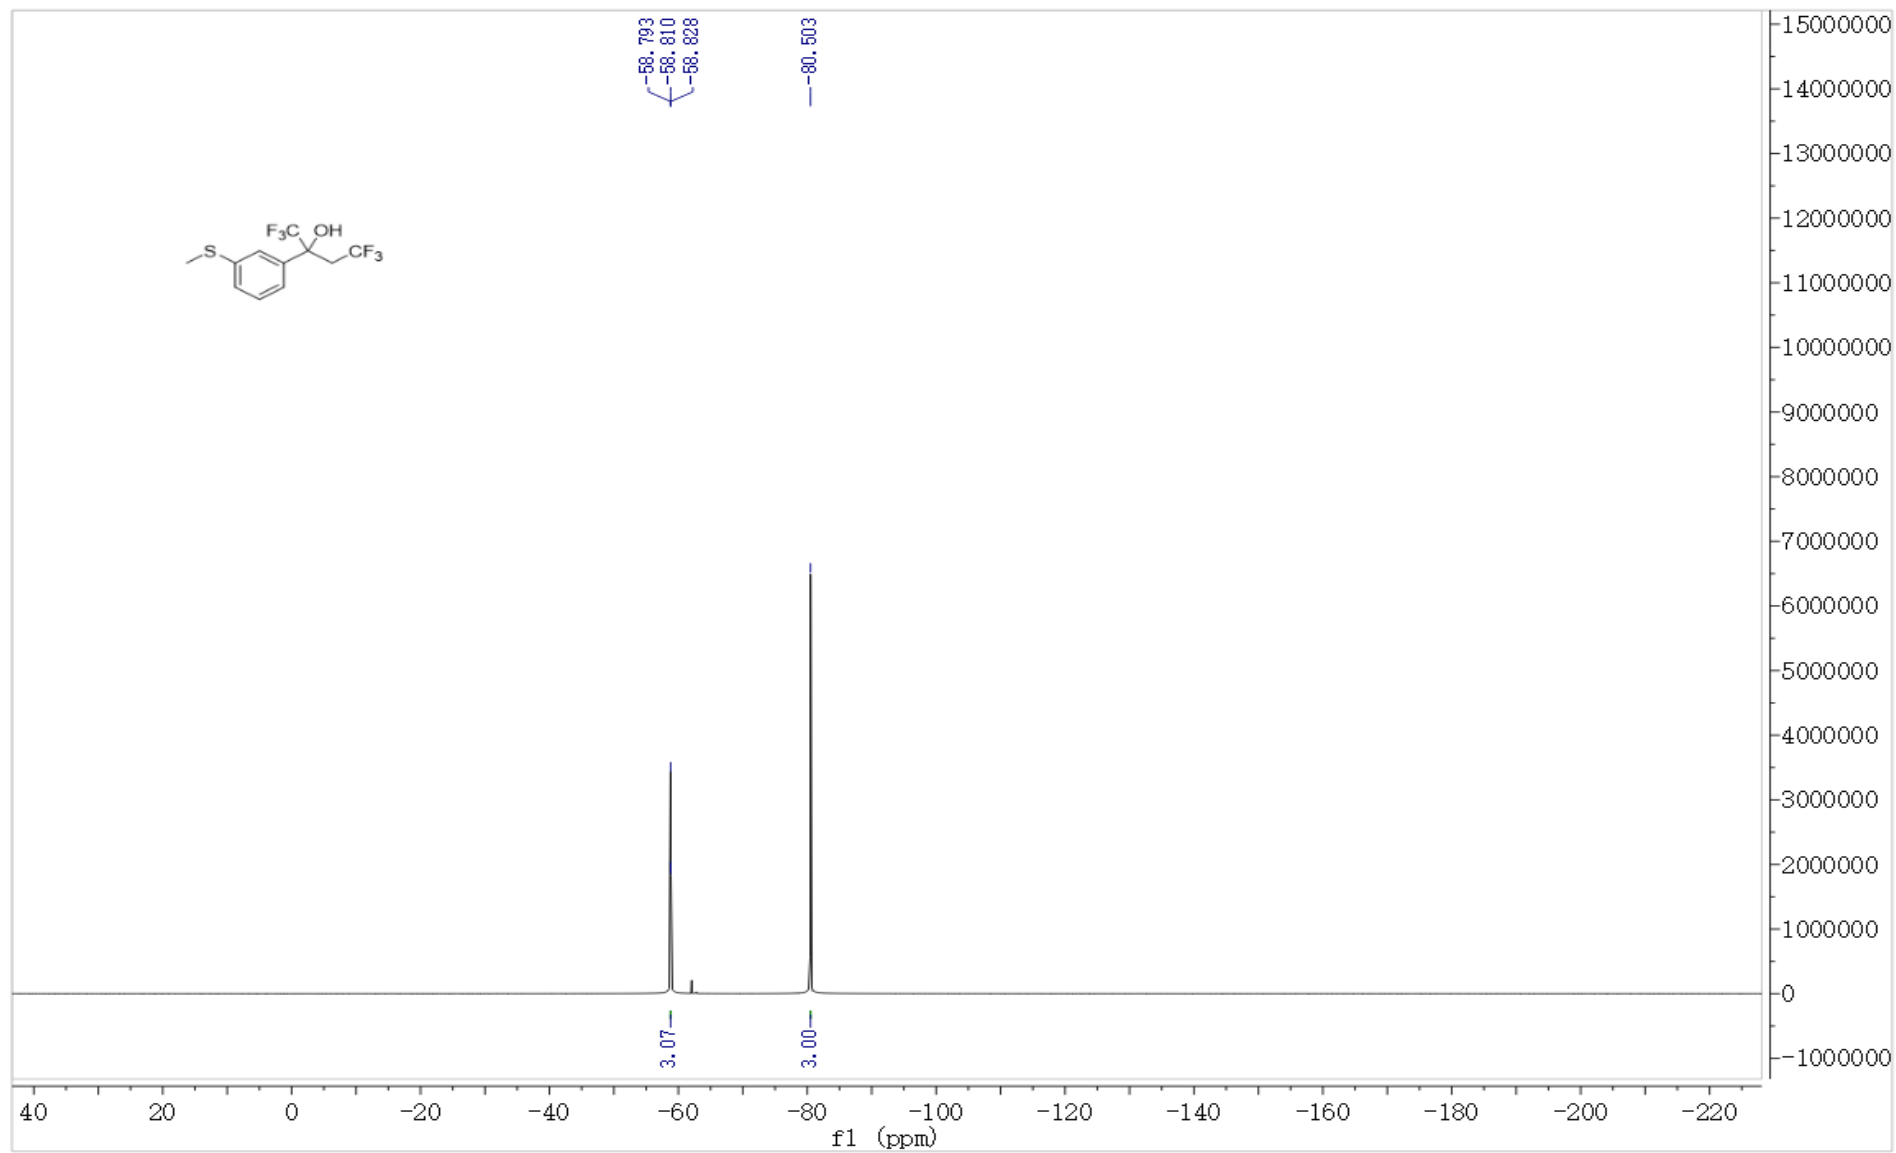

HRMS (EI) spectrum of 2g

CS-LC-M-304

20212805 59 (0.985) Cm (59-(25+146))

Waters GCT Premier

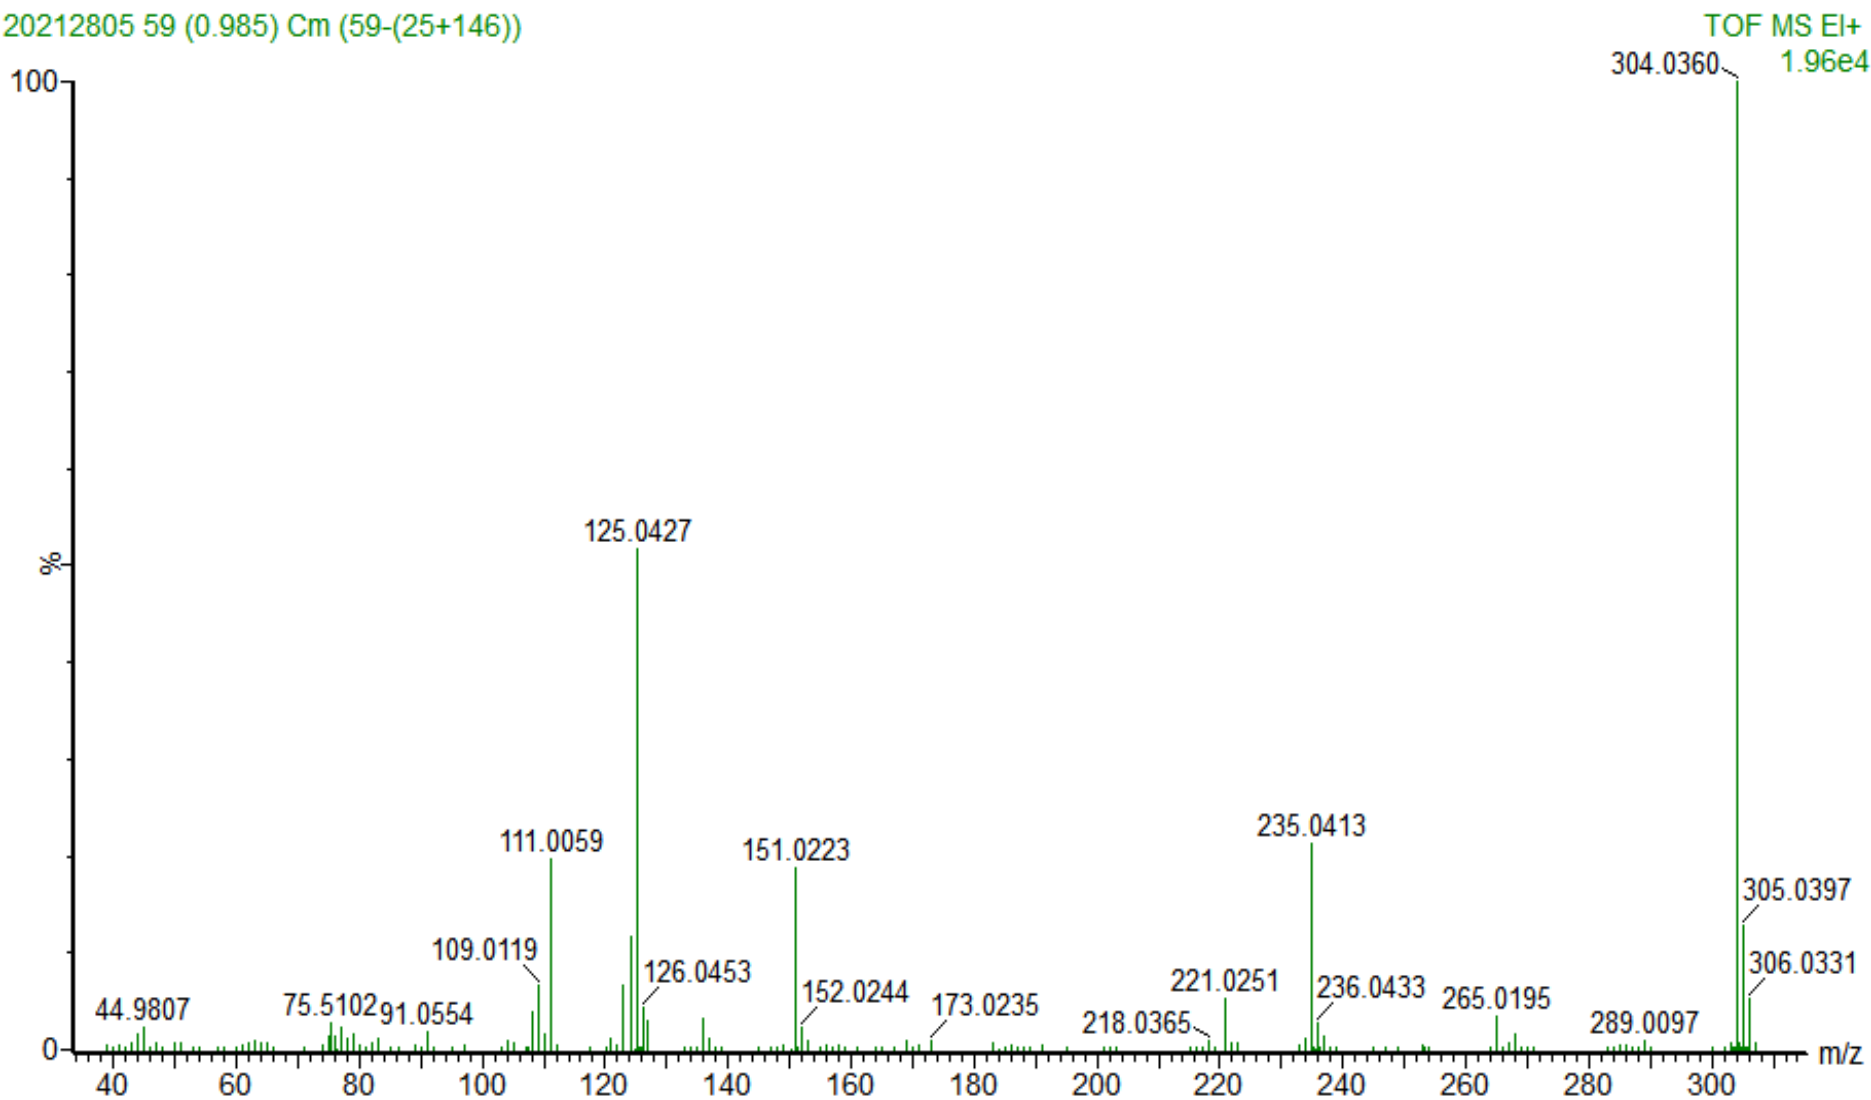

# <sup>1</sup>H NMR spectrum of 2h

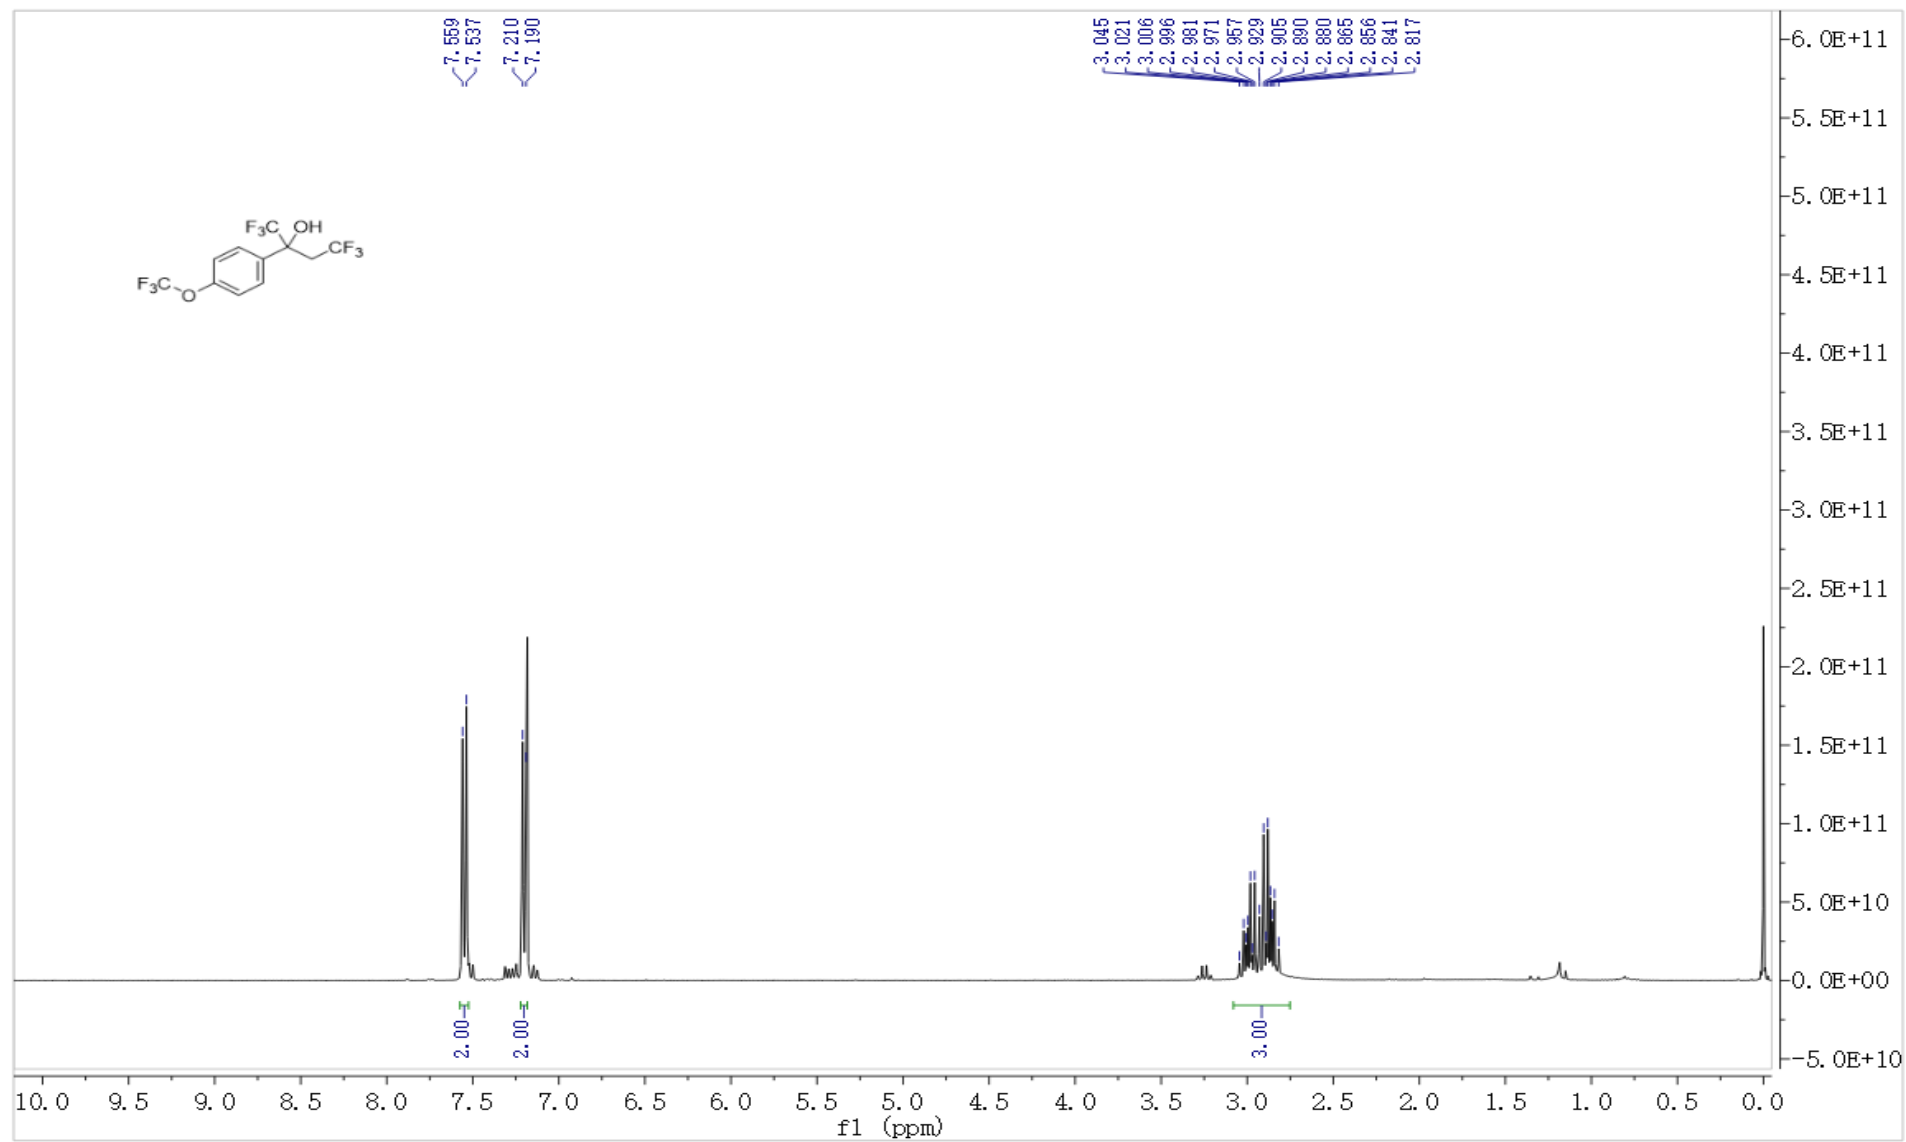

<sup>13</sup>C NMR spectrum of 2h

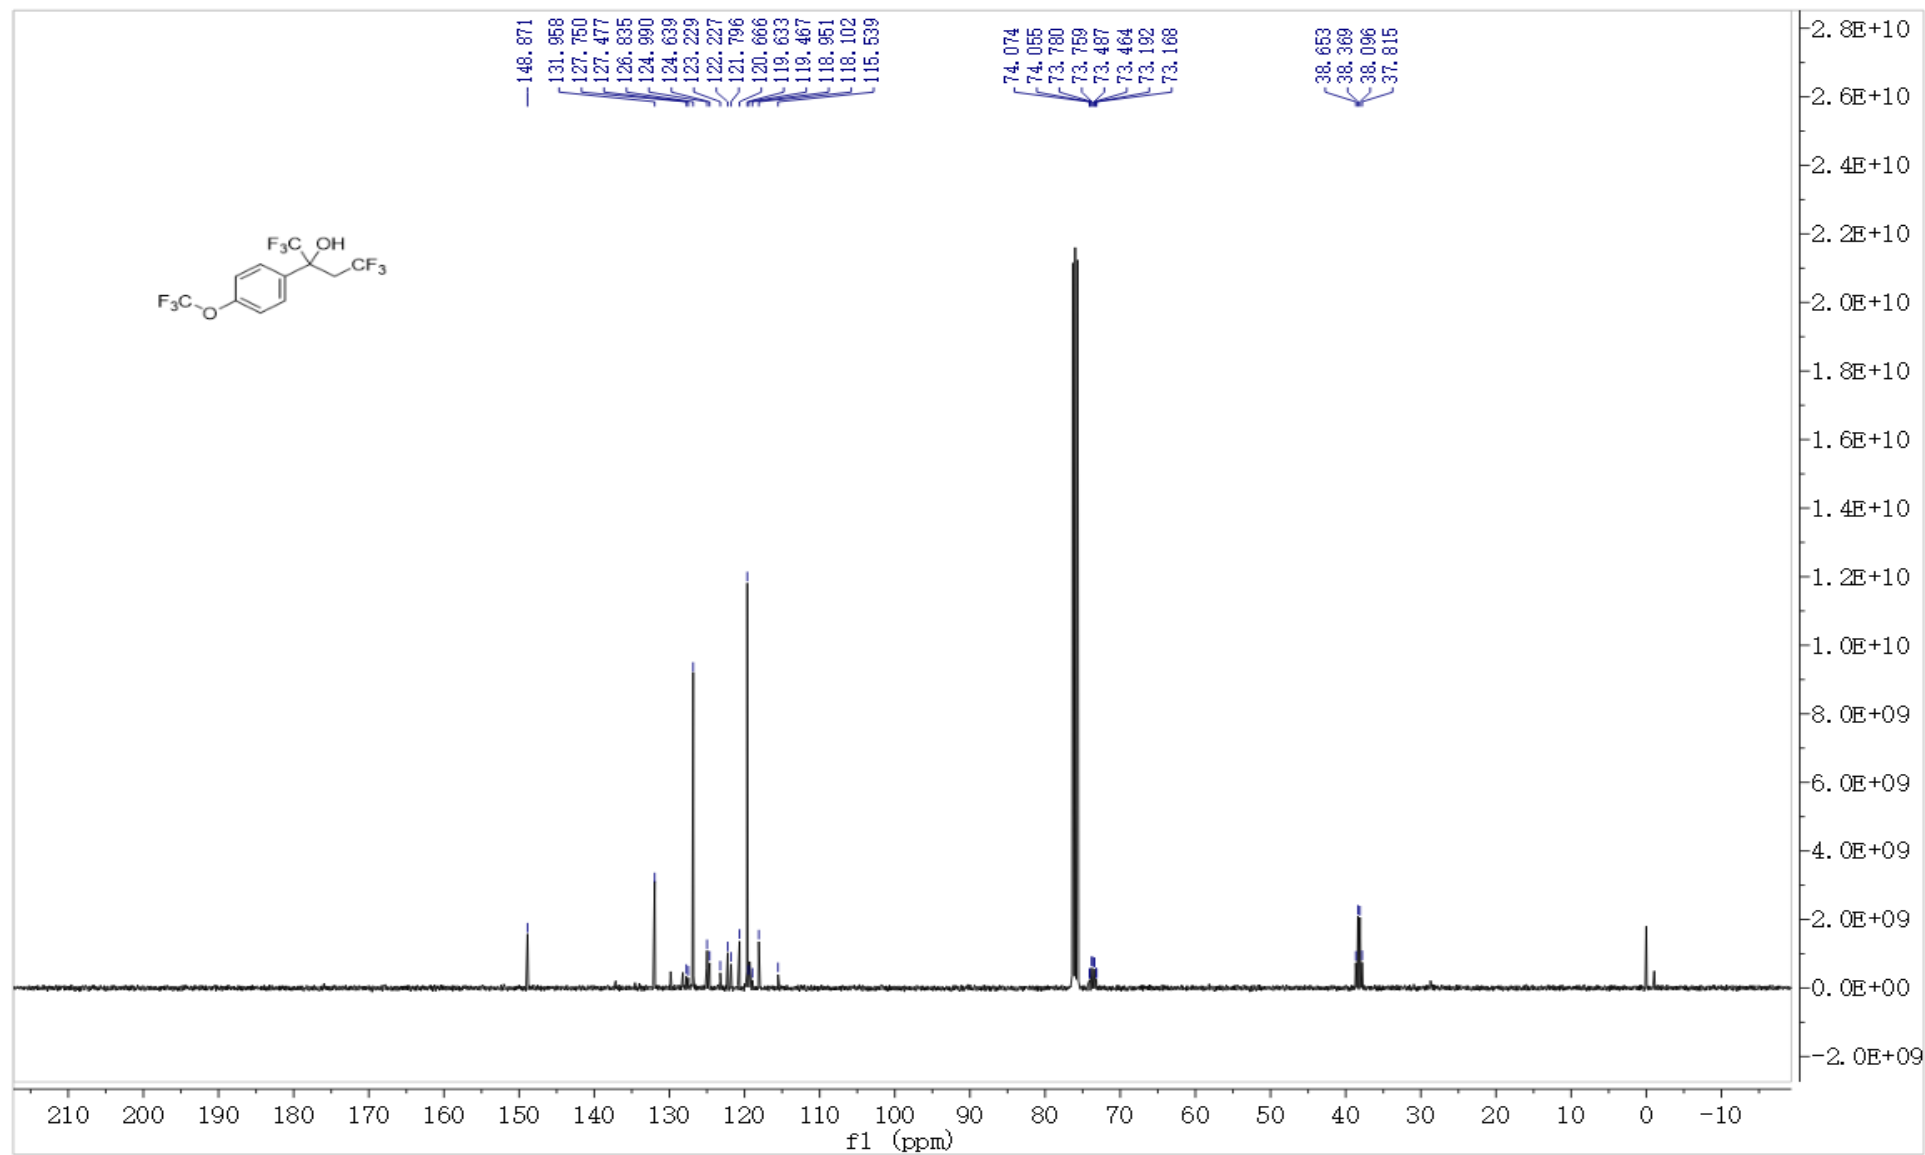



**$^{19}\text{F}$  NMR spectrum of 2h**

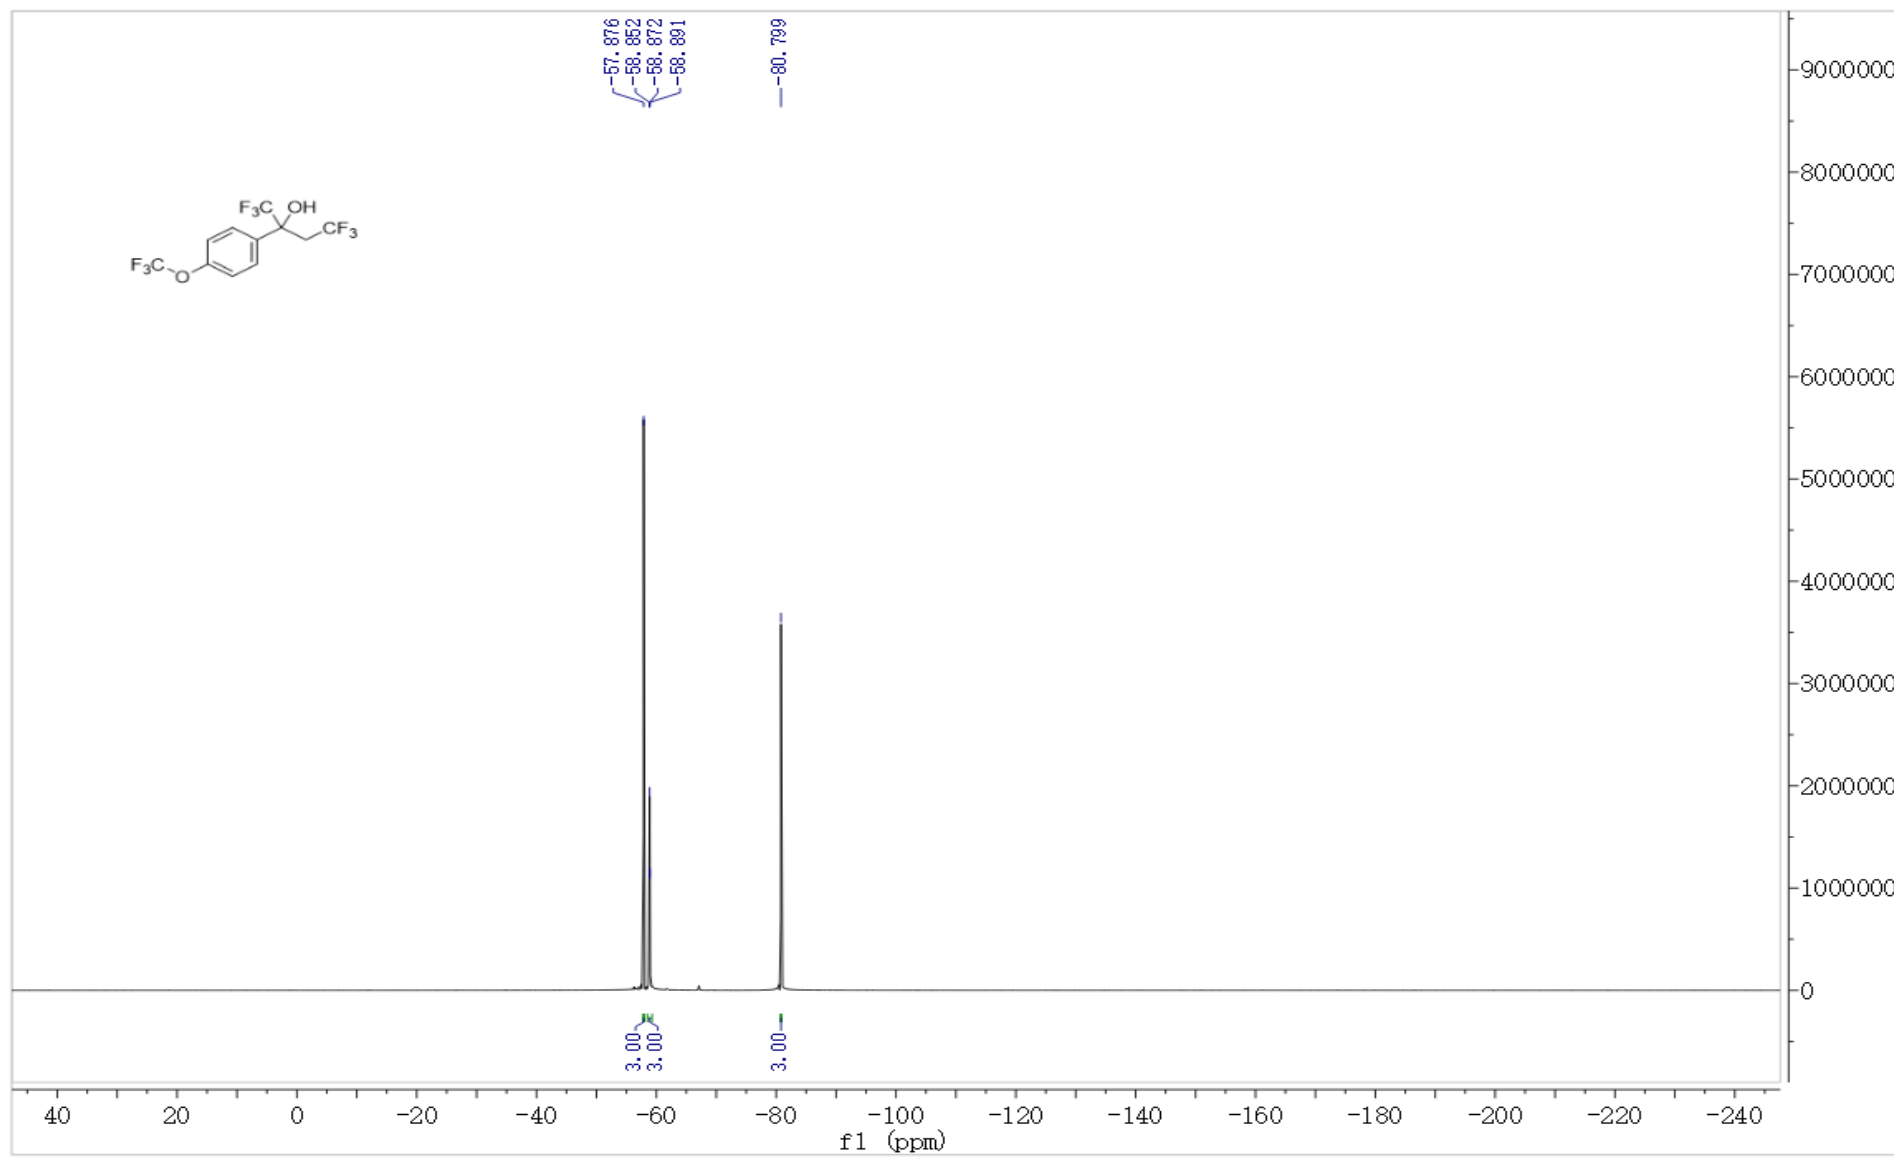

HRMS (EI) spectrum of 2h

CS-LC-P-342

20220306 251 (3.020) Cm (251-(83+122))

Waters GCT Premier

TOF MS EI+  
1.76e4

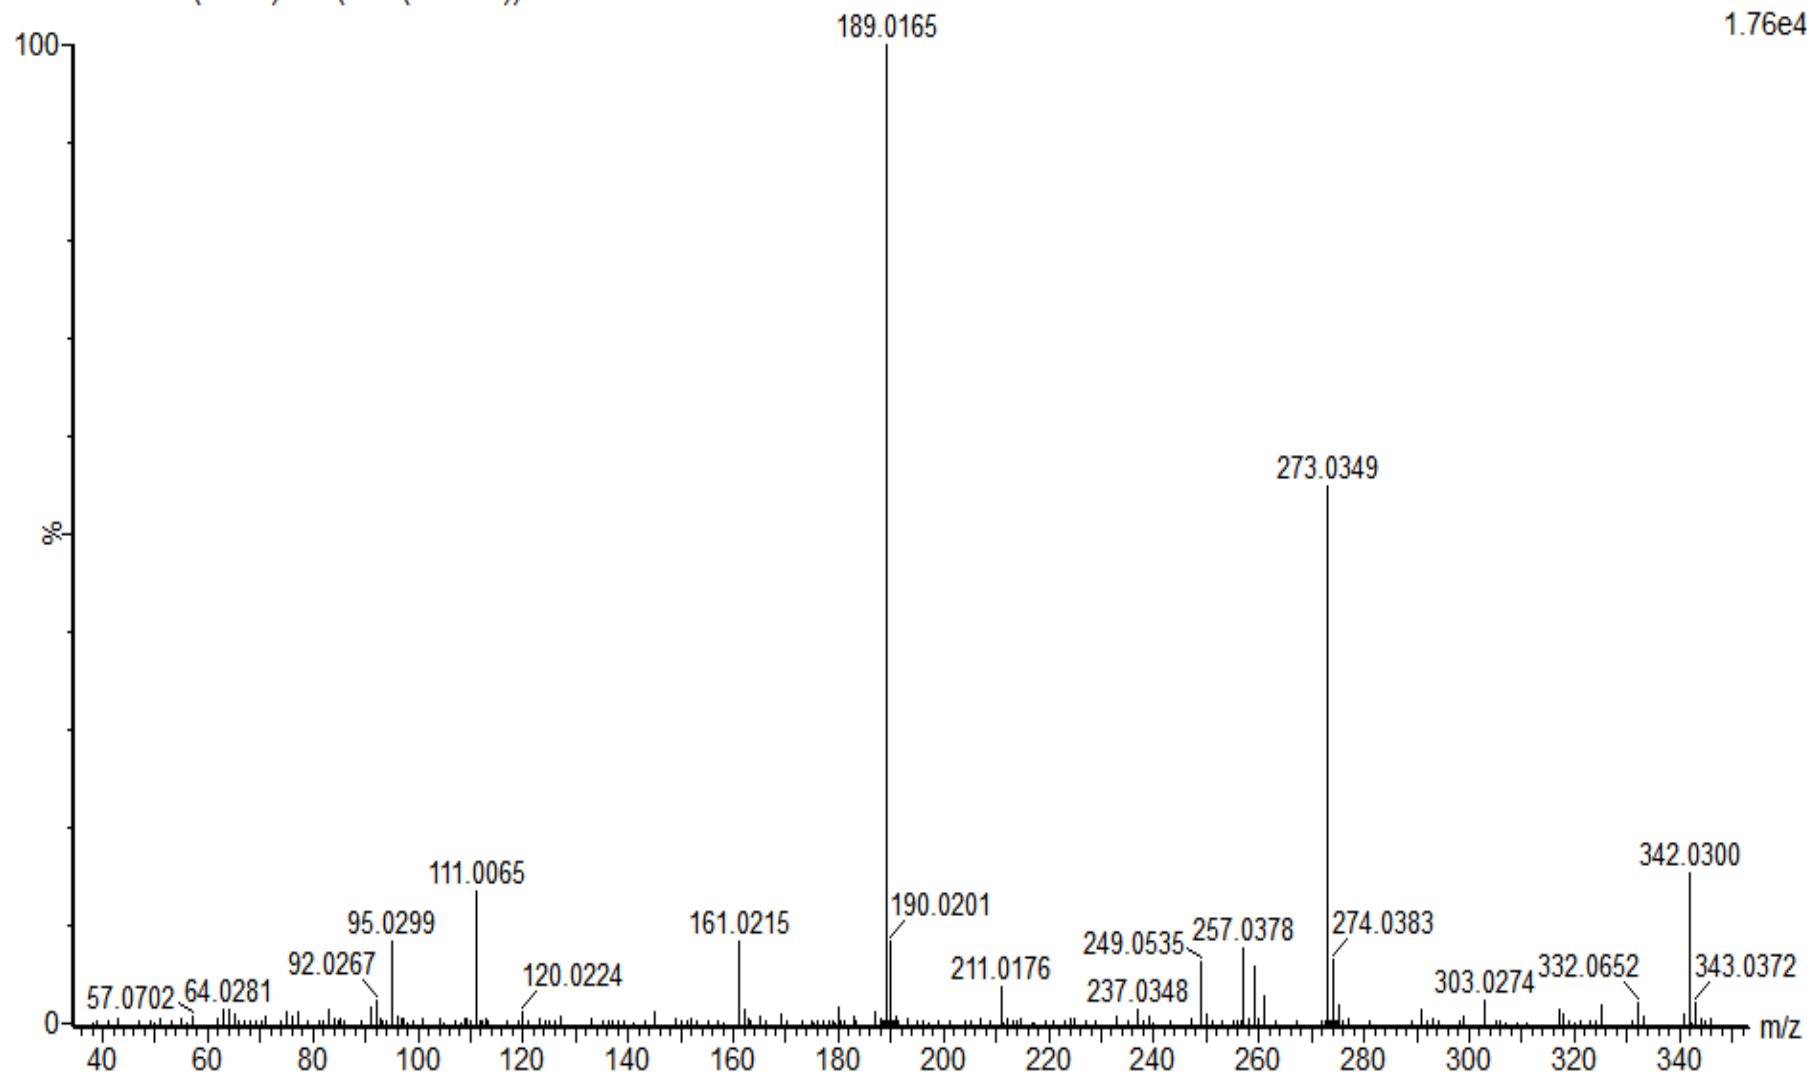

<sup>1</sup>H NMR spectrum of 2i

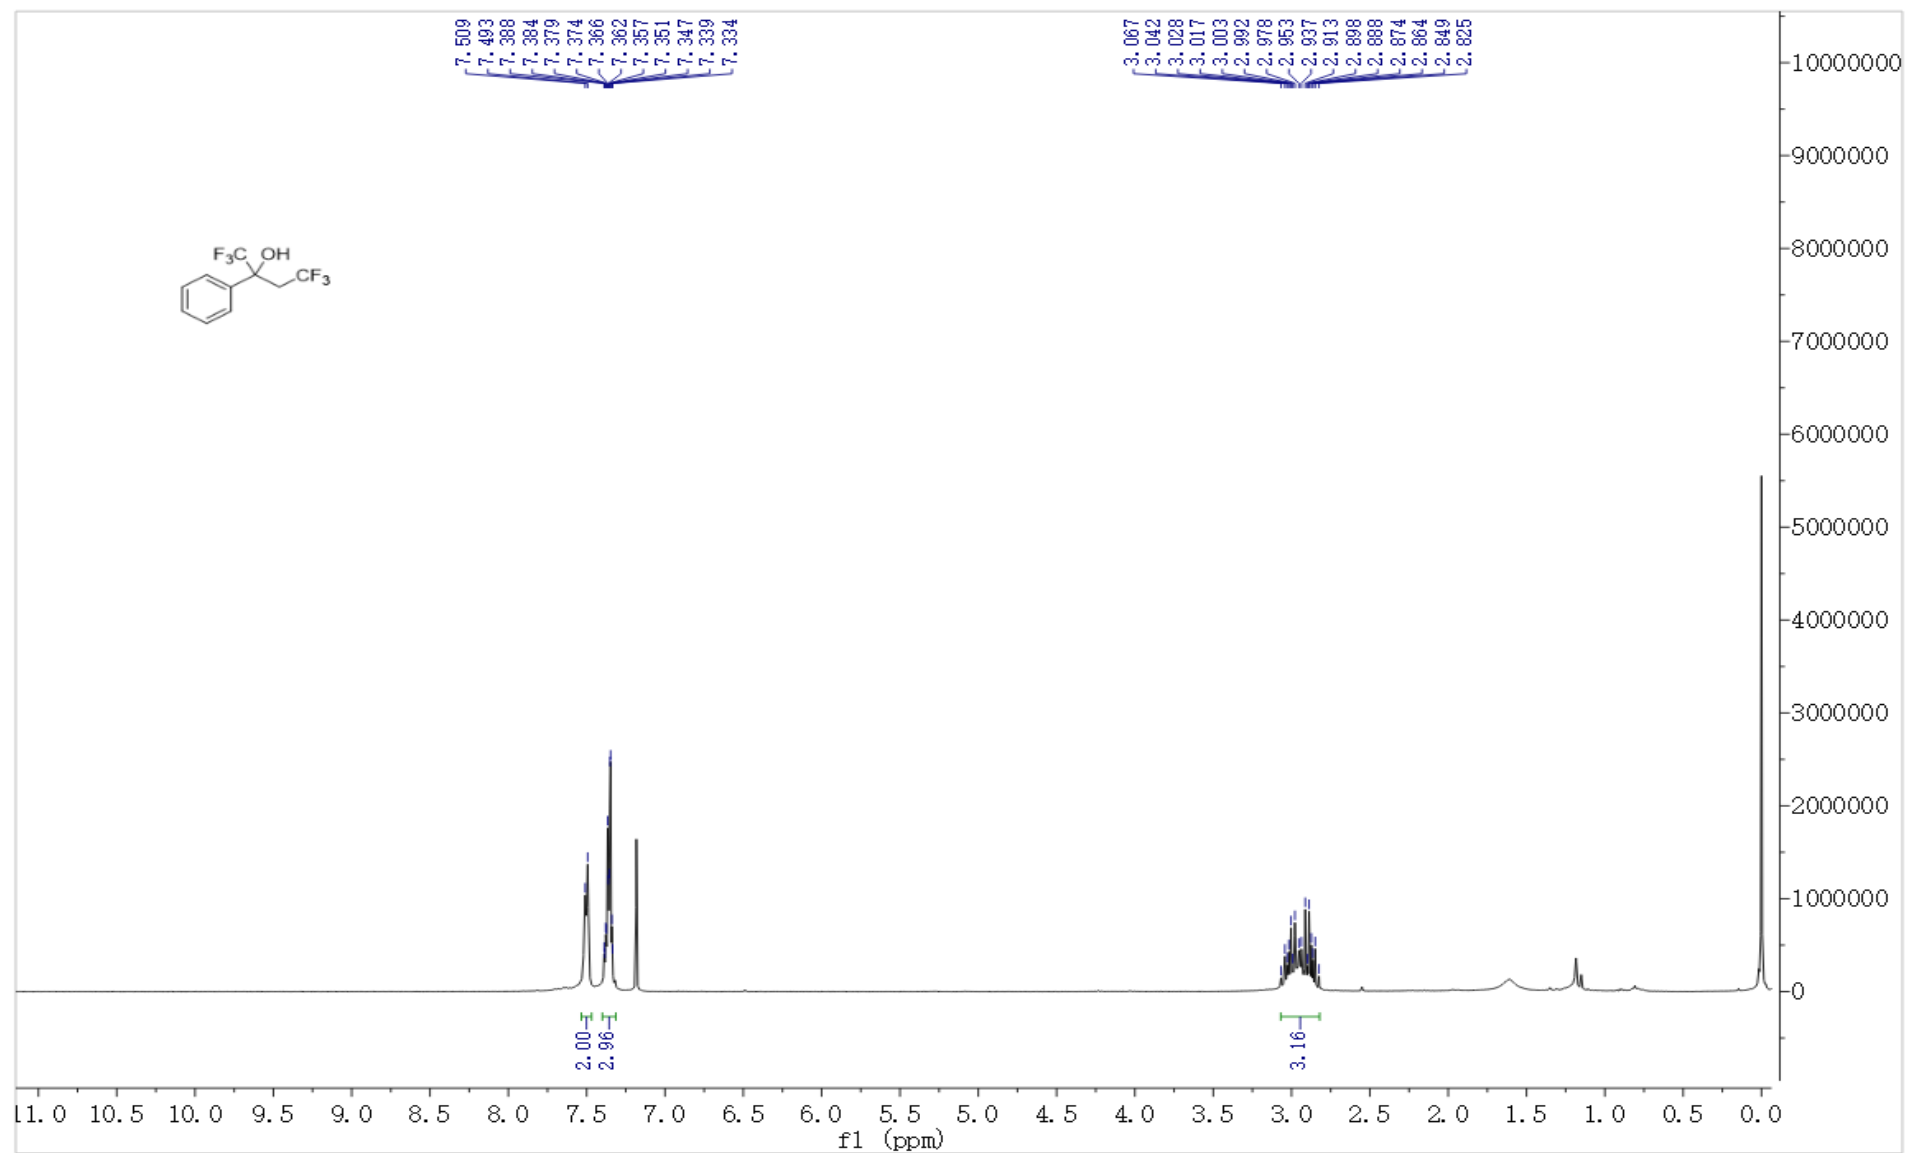

<sup>13</sup>C NMR spectrum of 2i

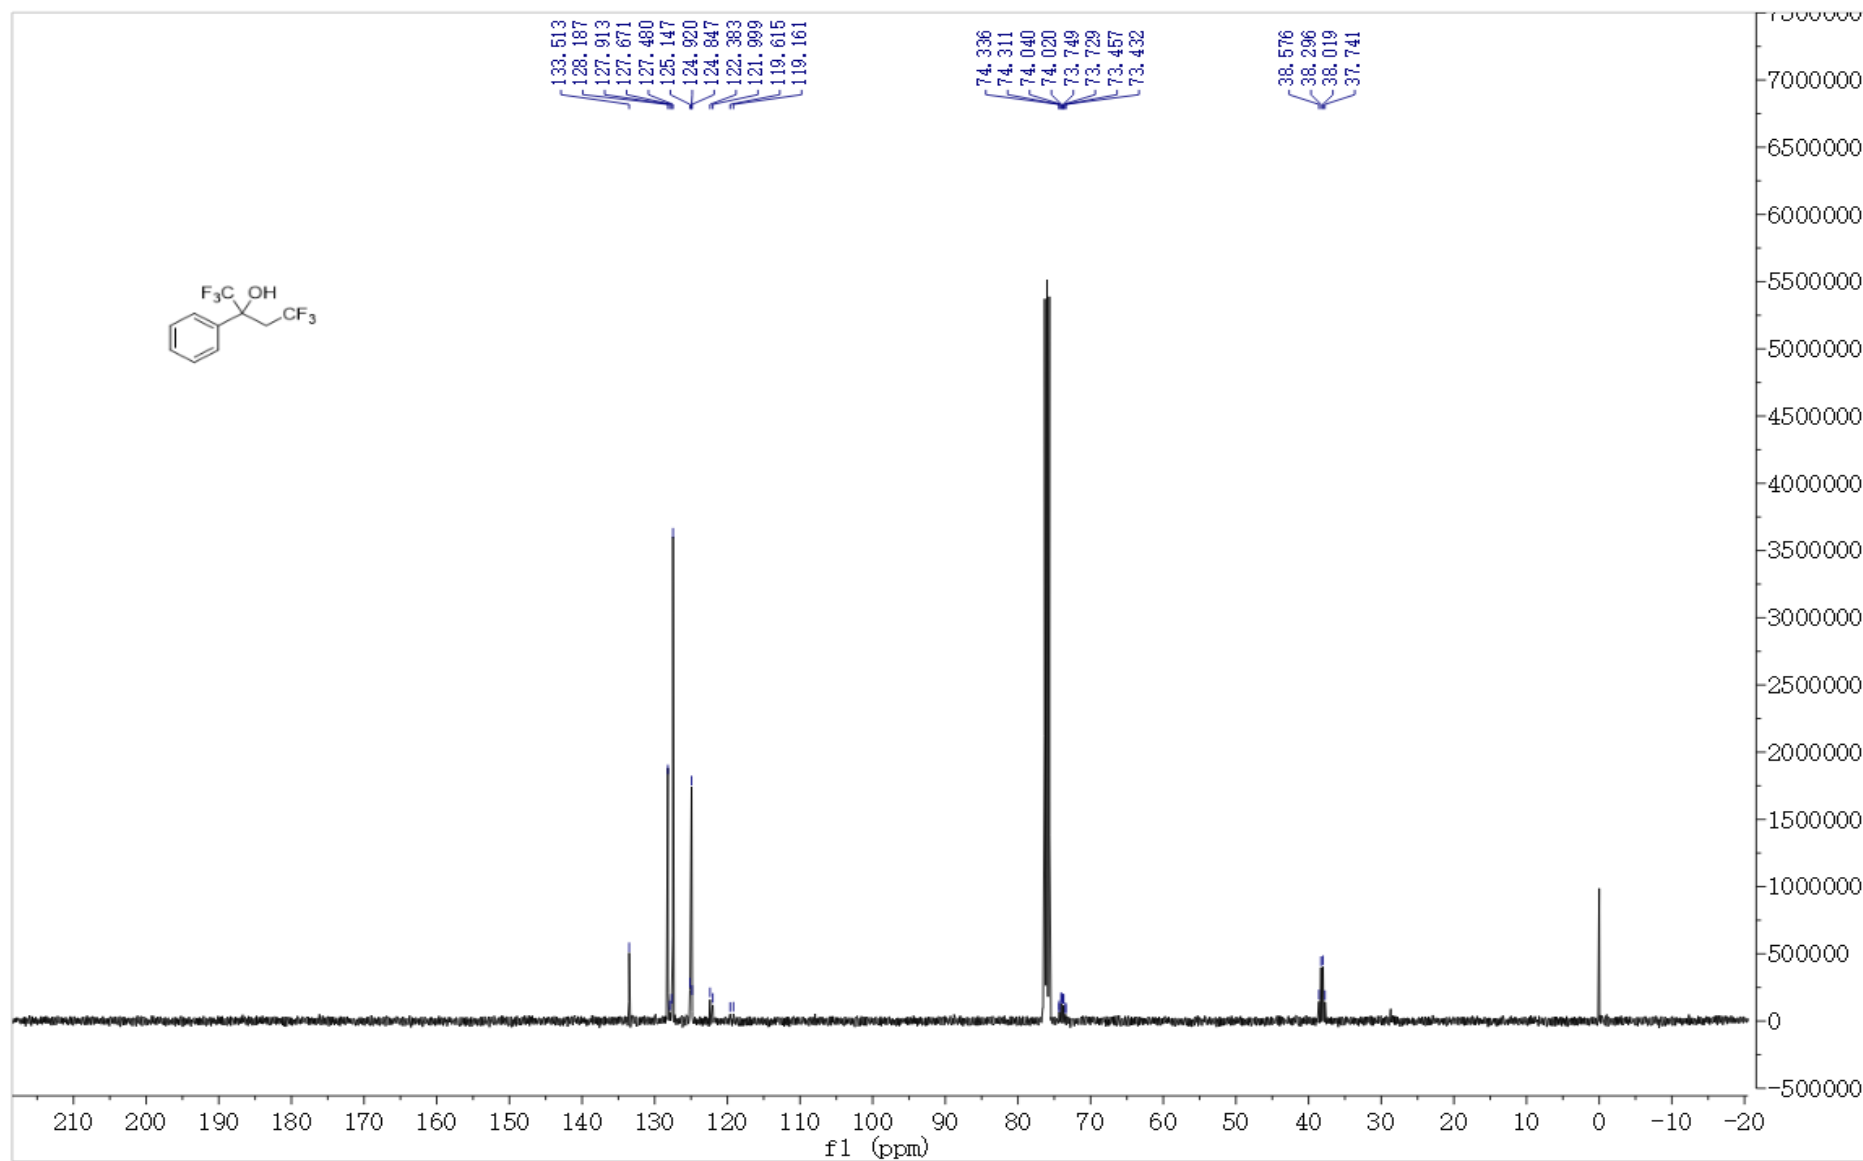

**<sup>19</sup>F NMR spectrum of 2i**

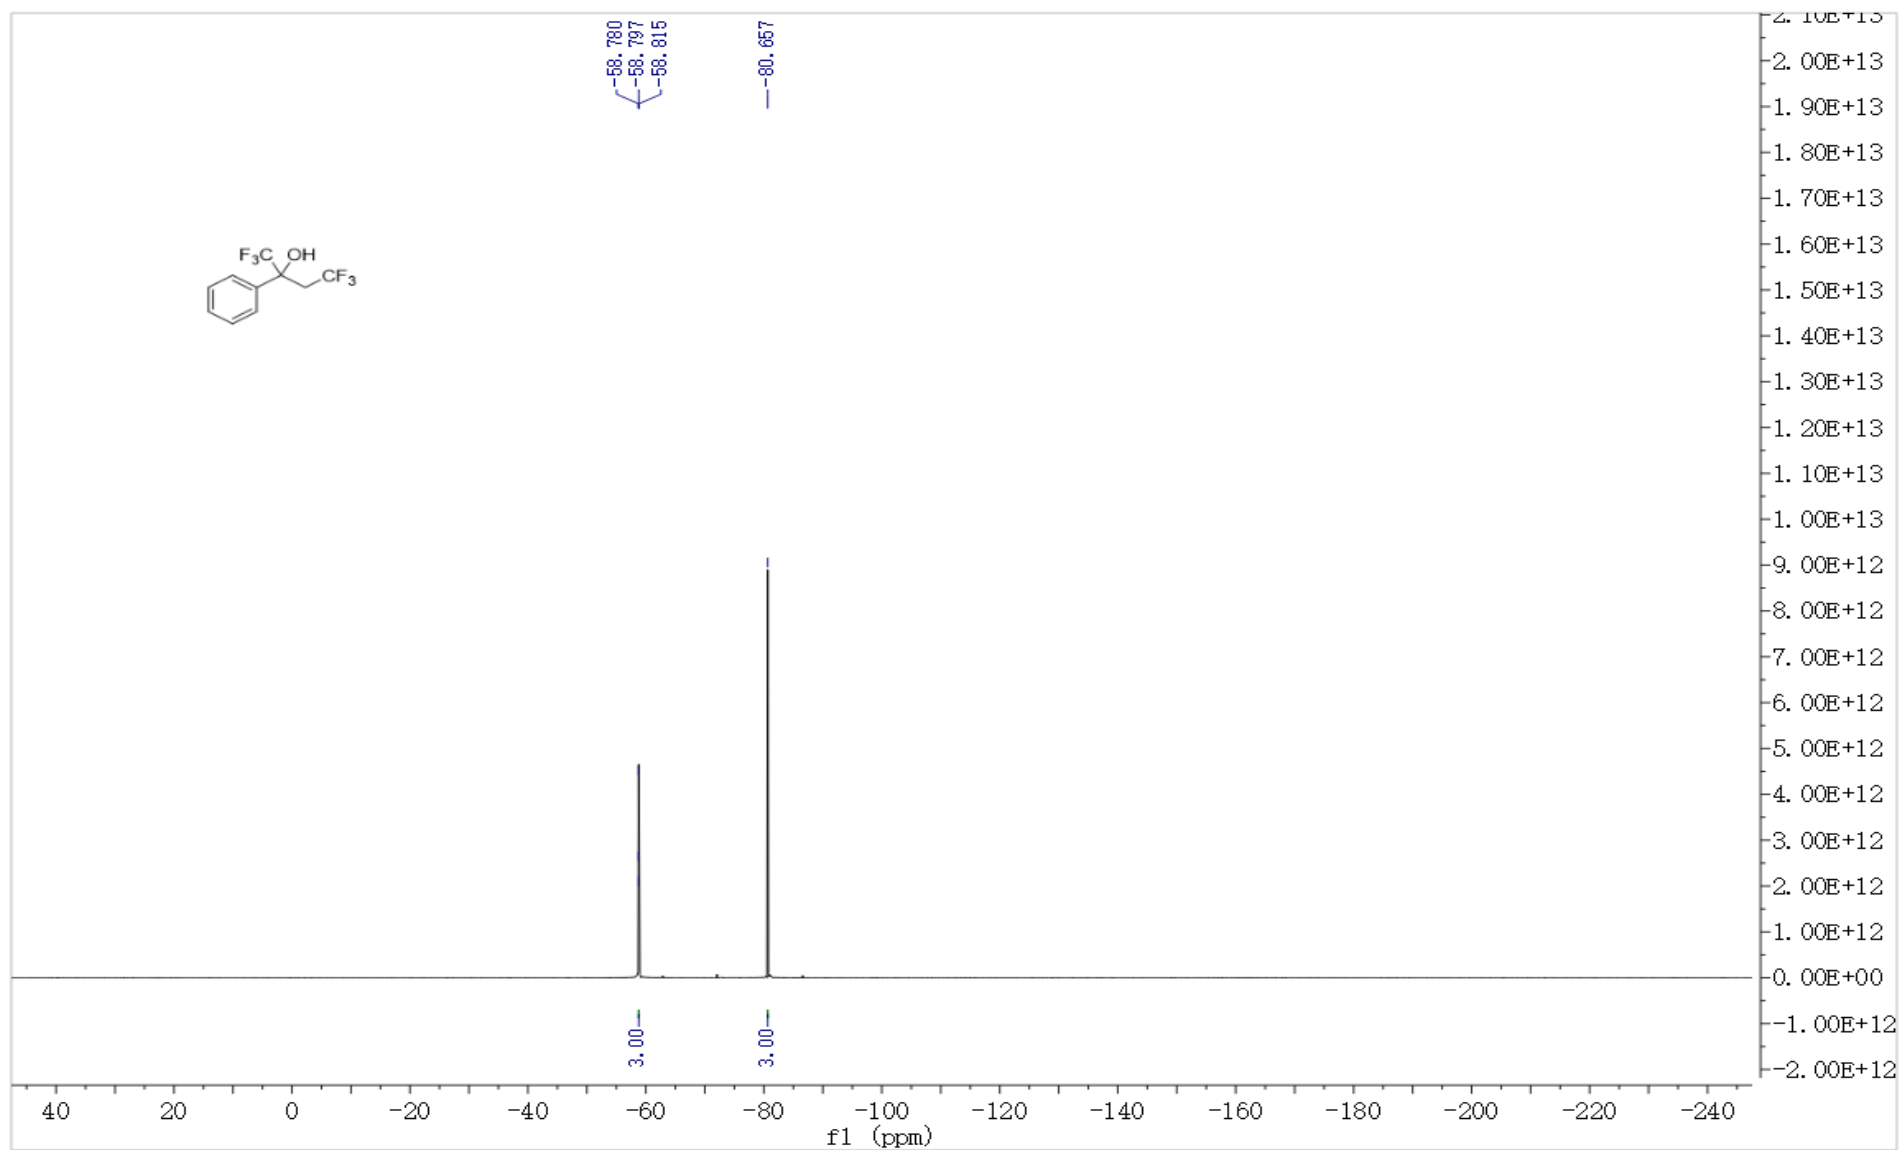

HRMS (EI) spectrum of 2i

CS-LC-P-258

Waters GCT Premier

20220486 69 (1.150) Cm (69-(160+508))

TOF MS EI+  
1.29e4

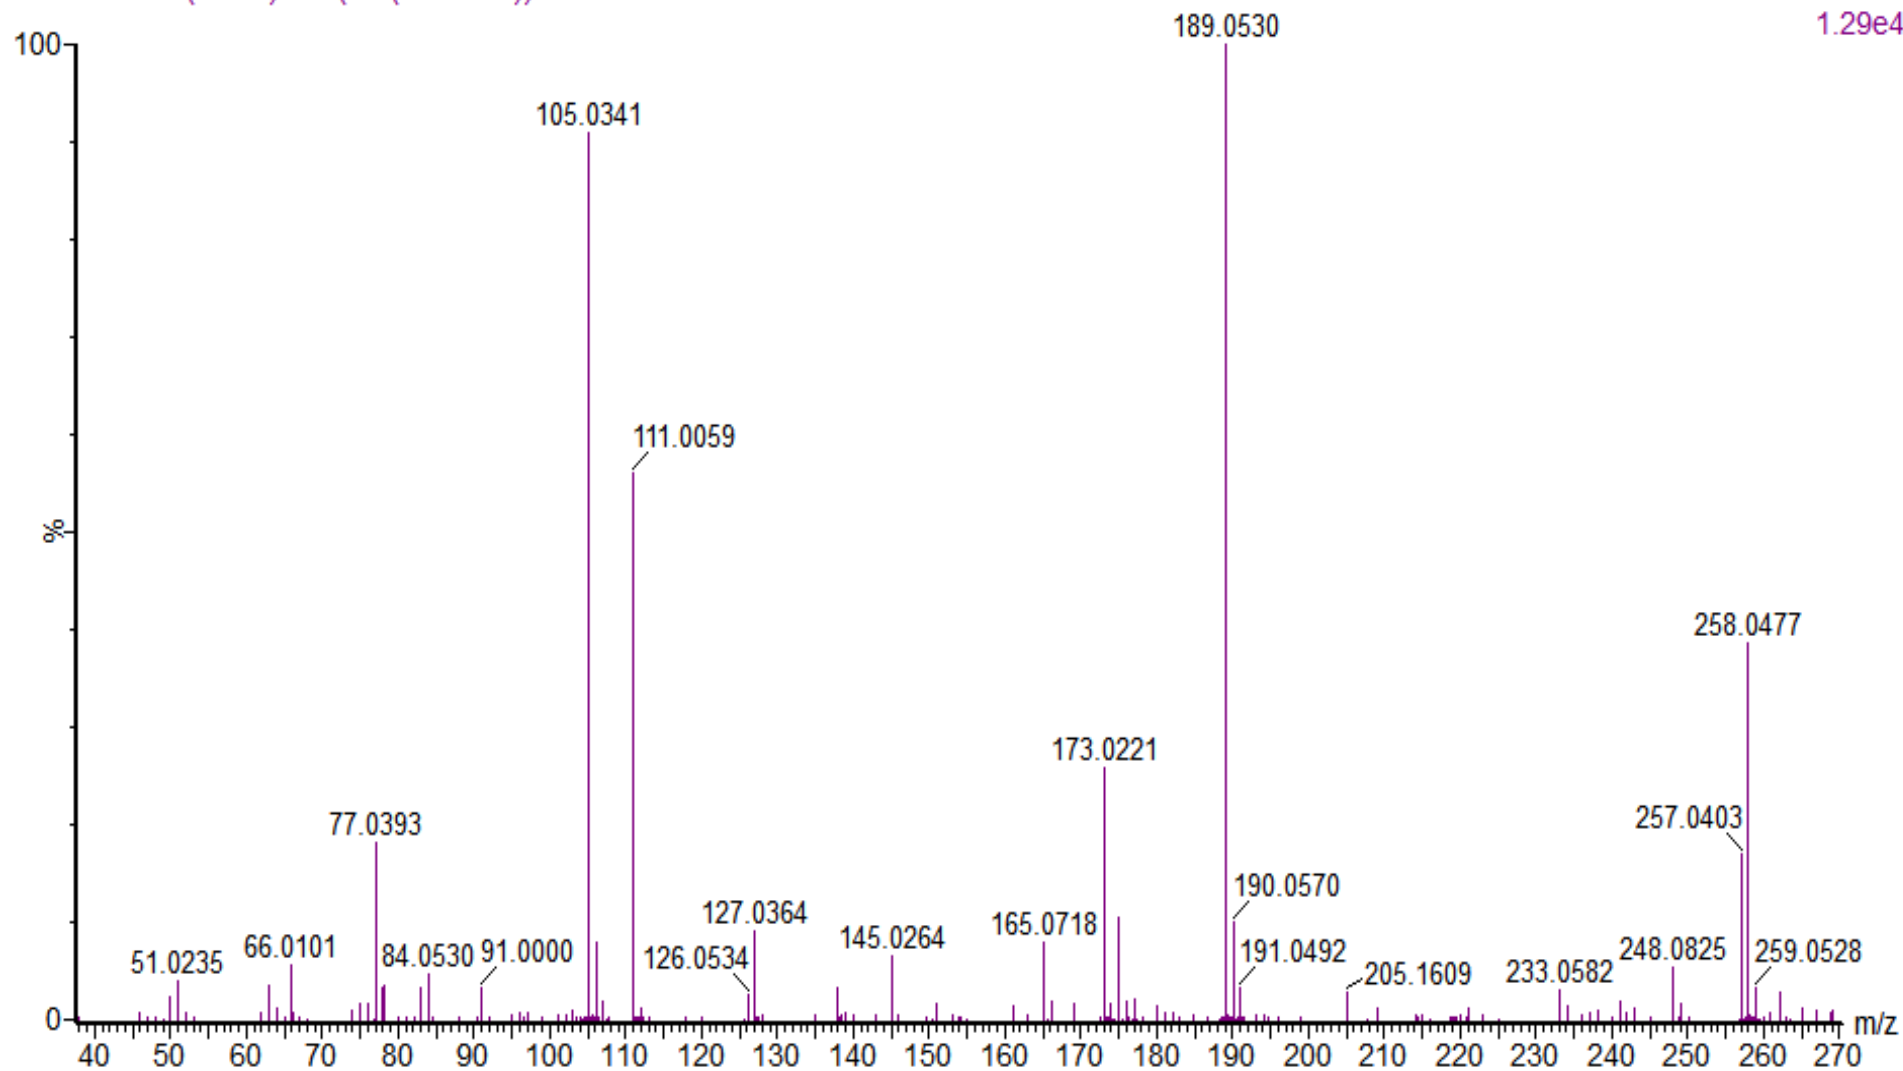

# <sup>1</sup>H NMR spectrum of 2j

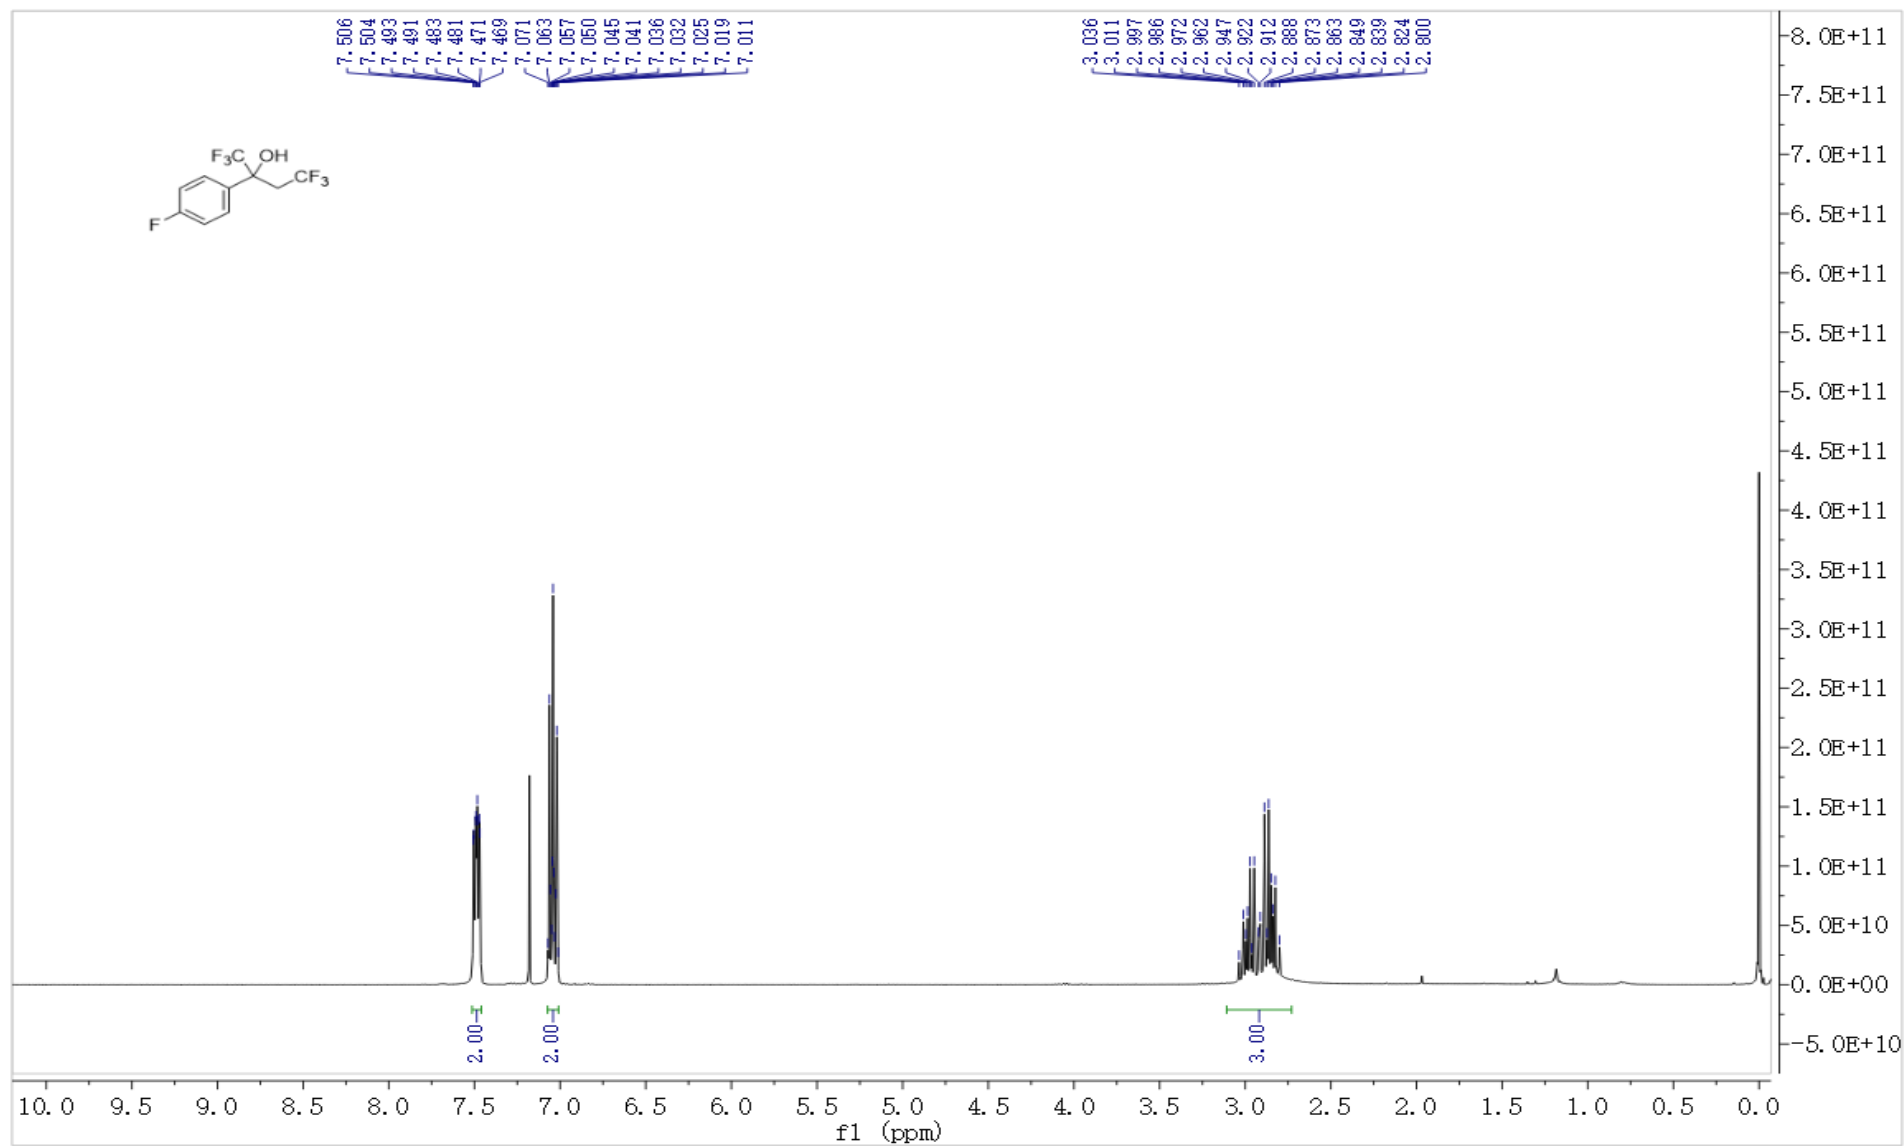

<sup>13</sup>C NMR spectrum of 2j

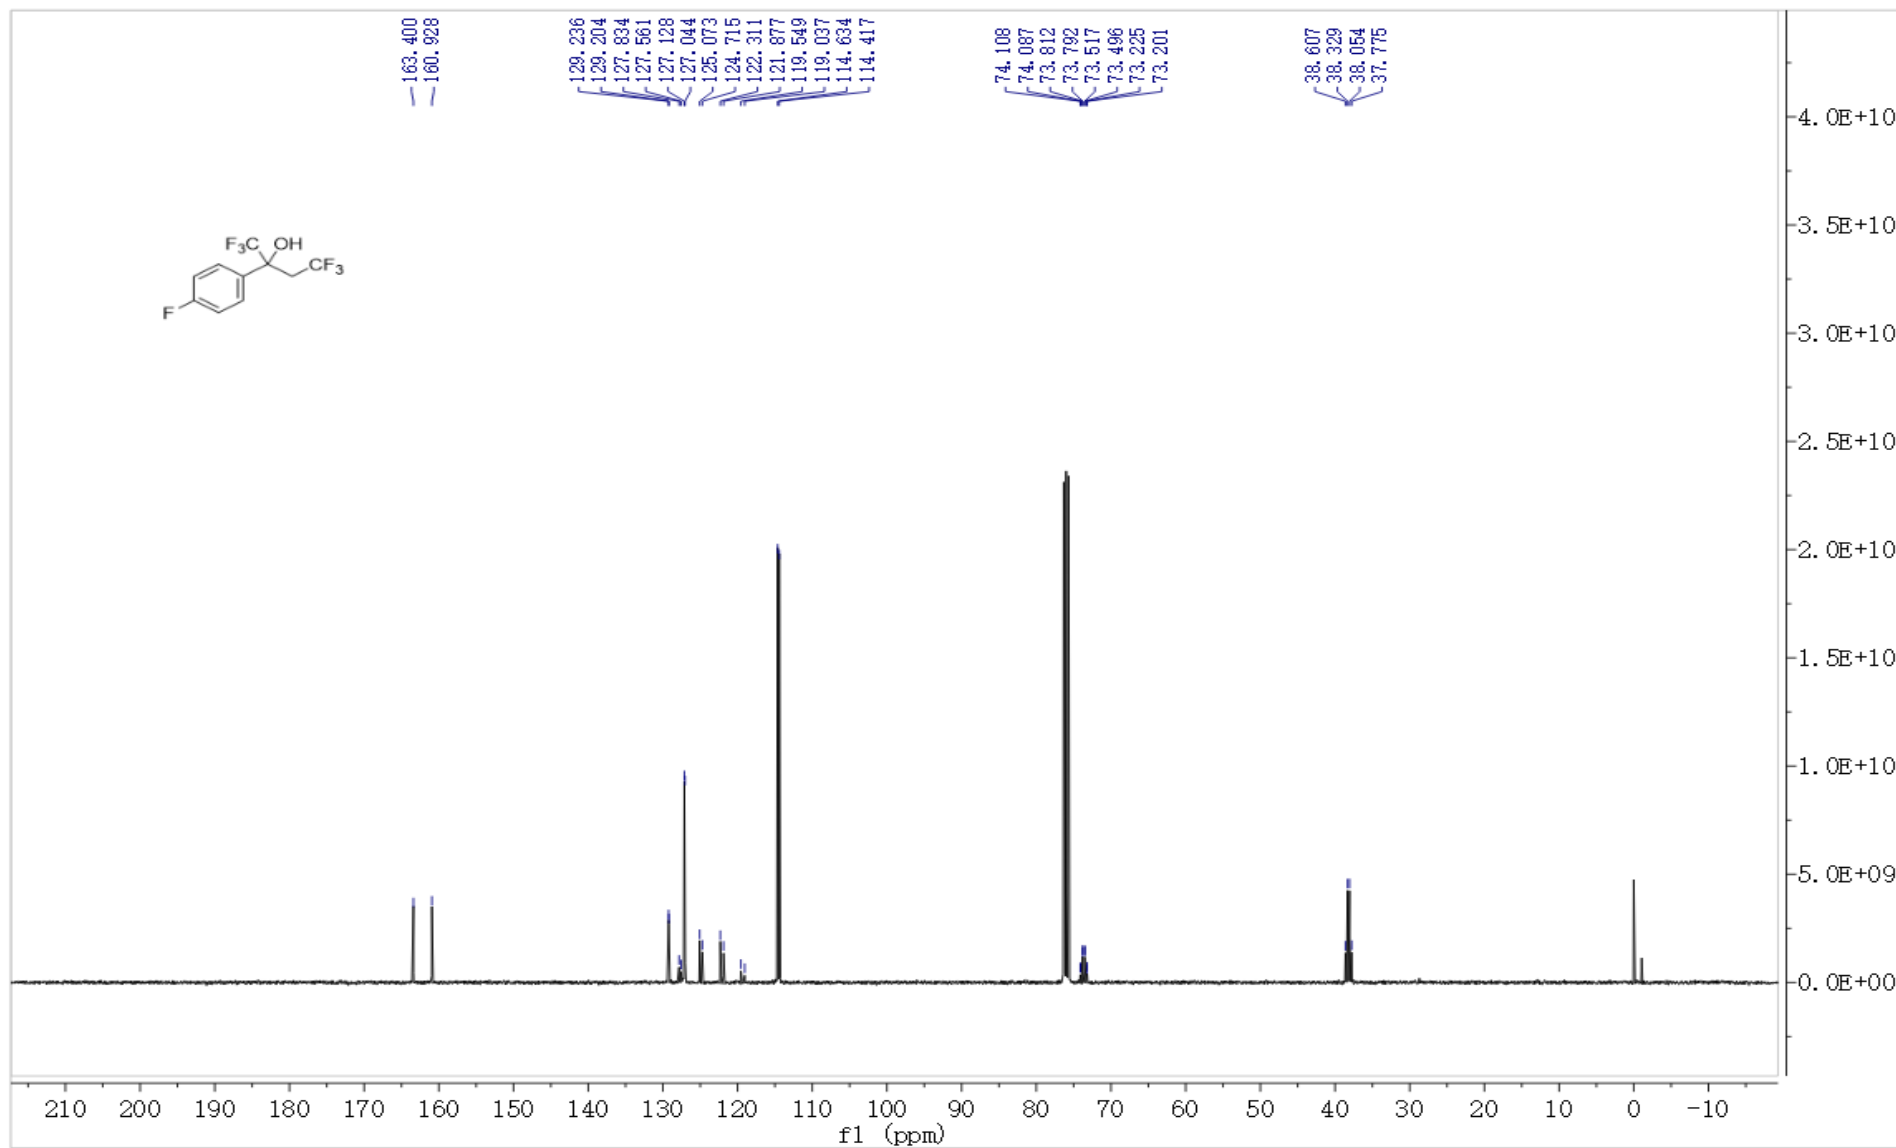



**<sup>19</sup>F NMR spectrum of 2j**

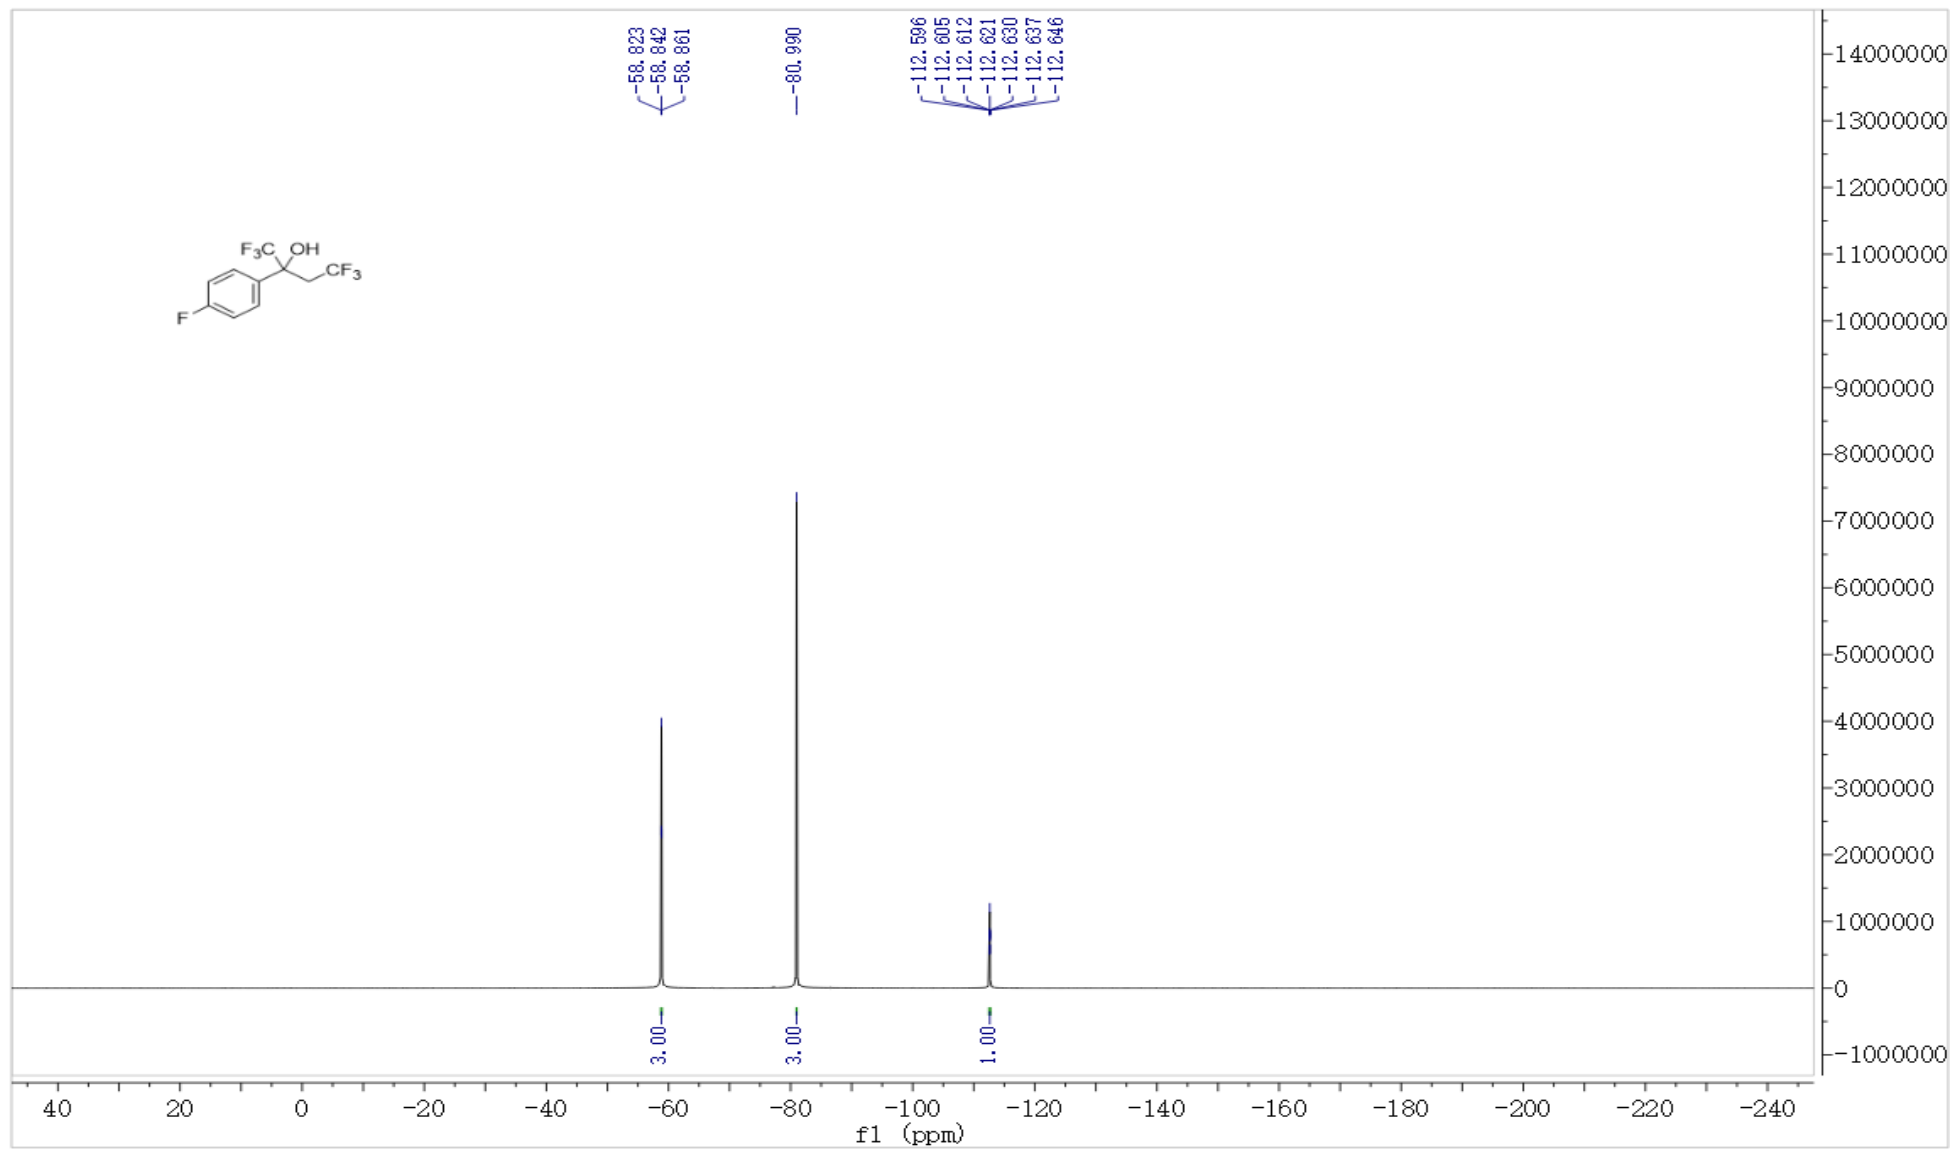

HRMS (EI) spectrum of 2j

CS-LC-P-276

Waters GCT Premier

20220305 175 (2.917) Cm (175-(25+60))

TOF MS EI+  
8.32e3

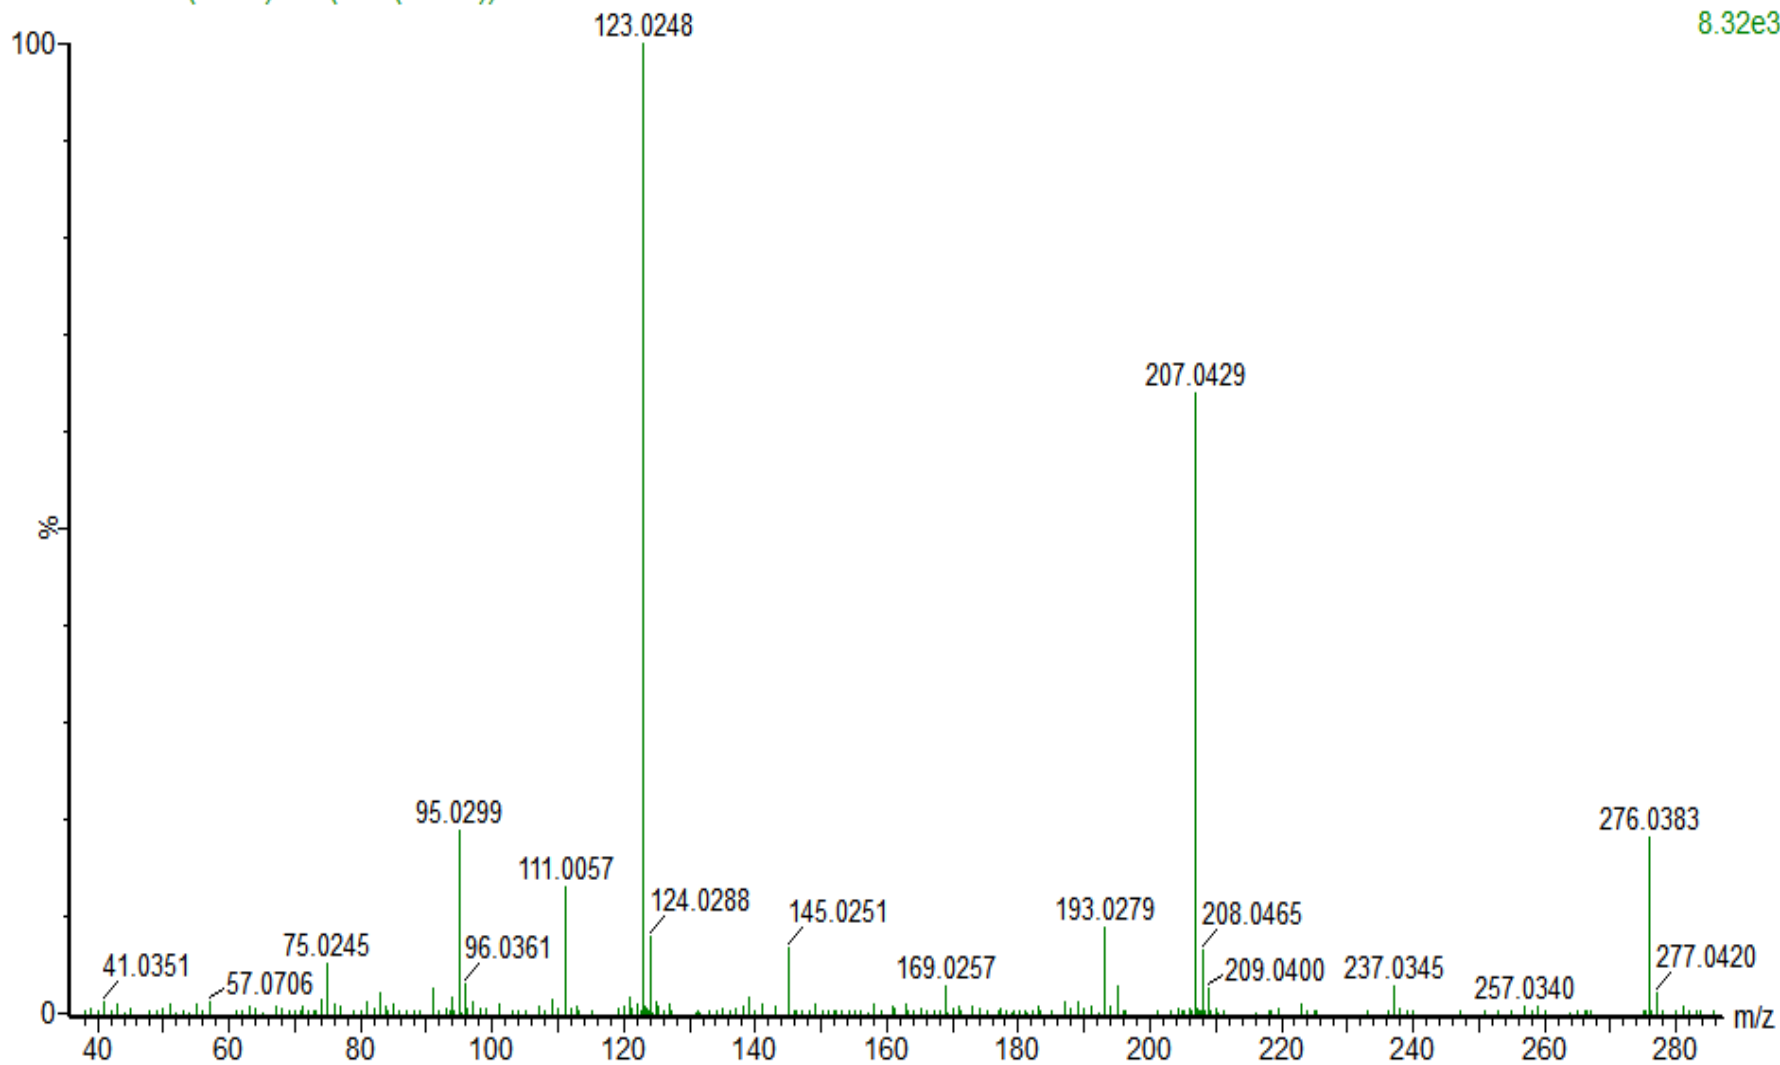

<sup>1</sup>H NMR spectrum of 2k

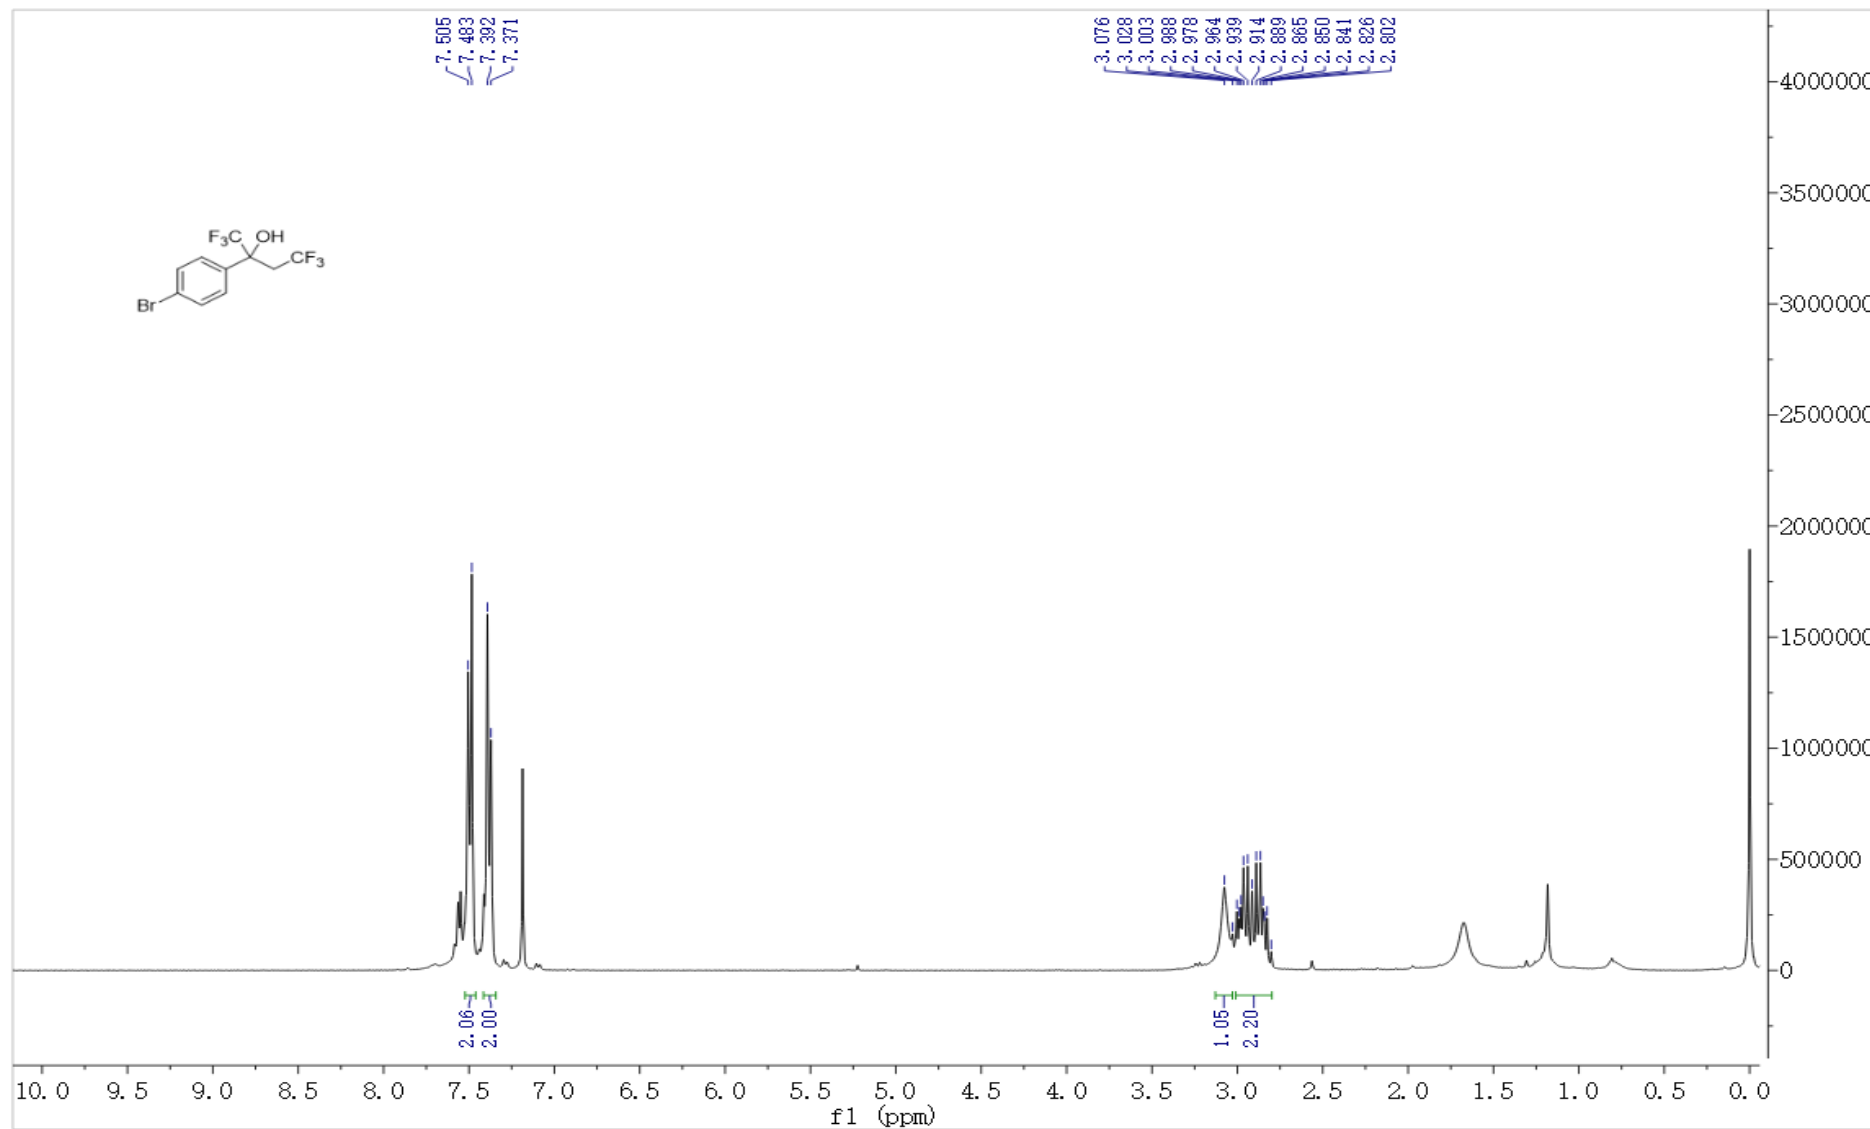

<sup>13</sup>C NMR spectrum of 2k

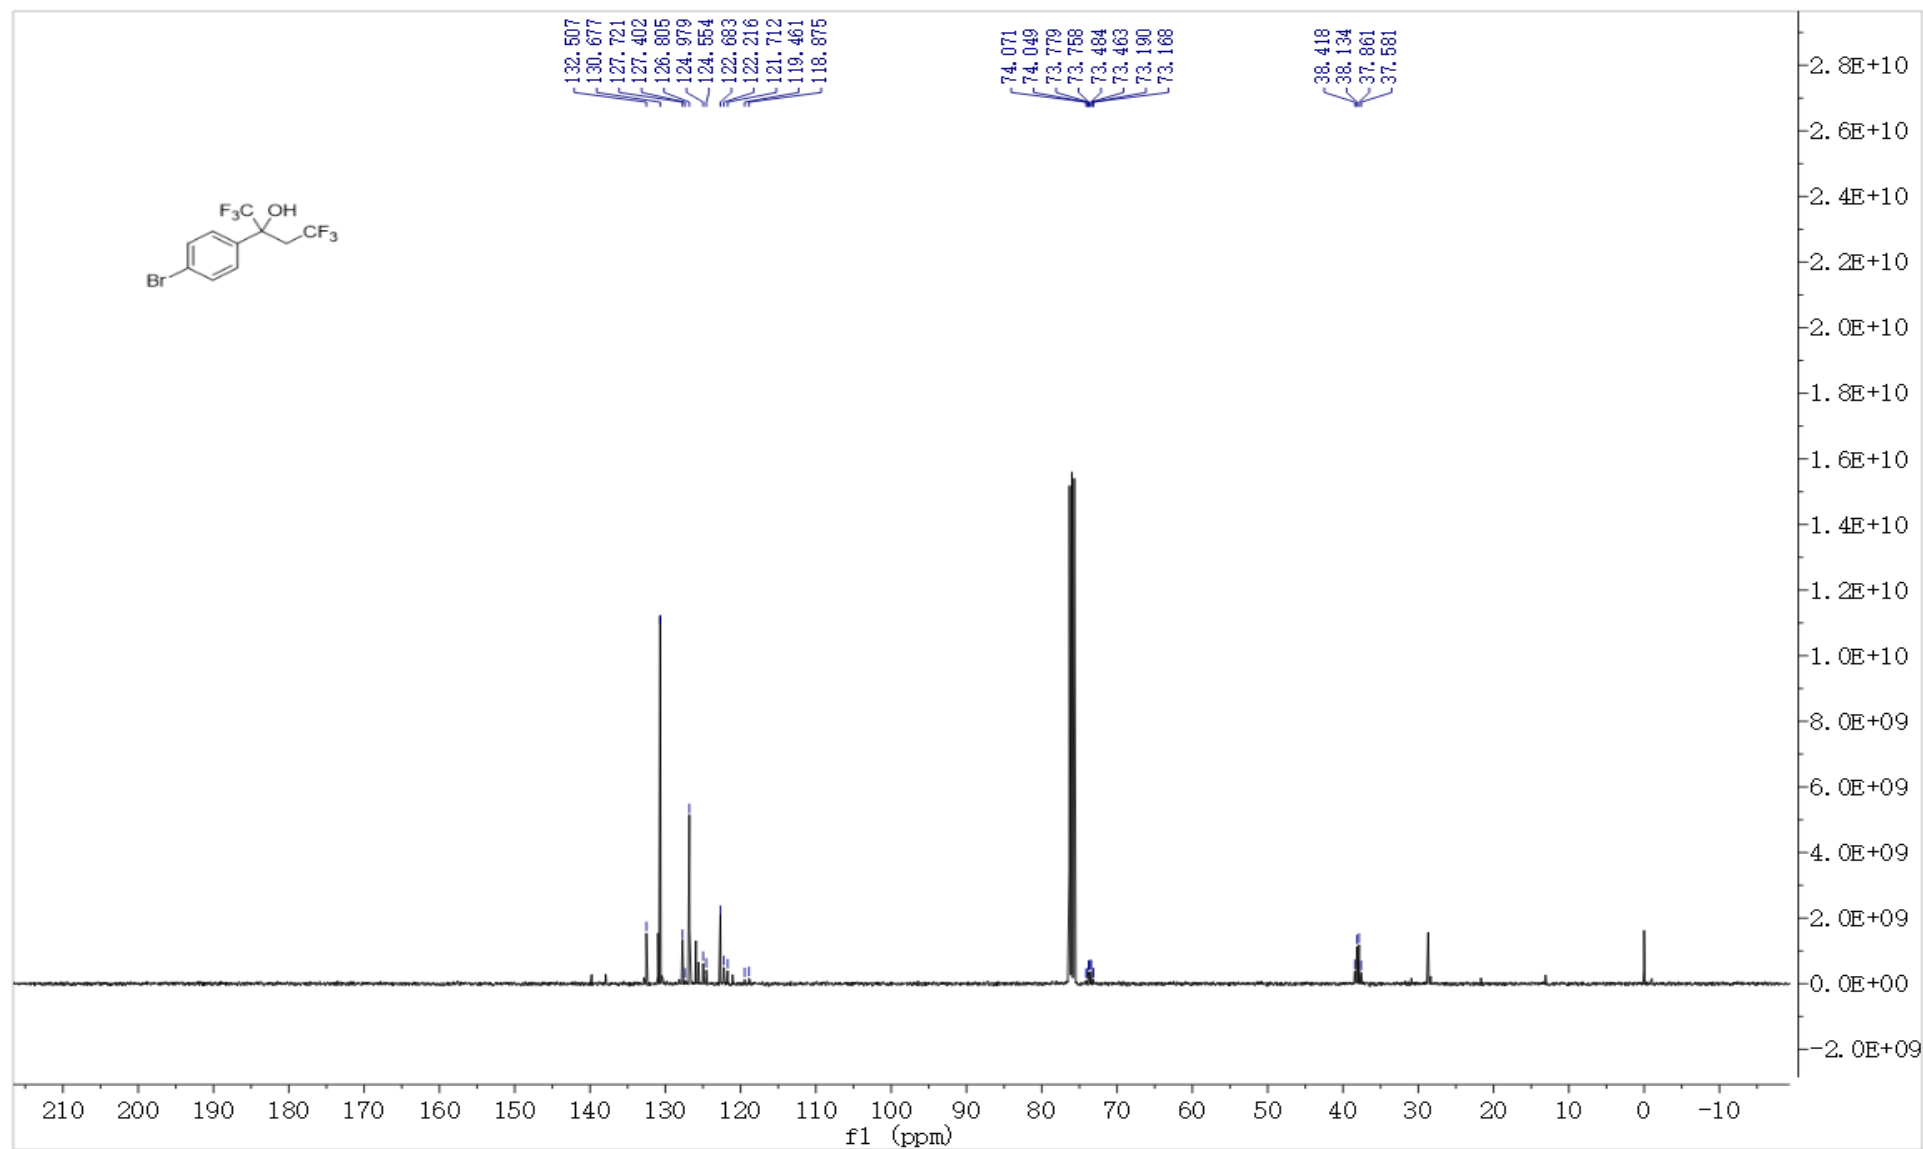

**<sup>19</sup>F NMR spectrum of 2k**

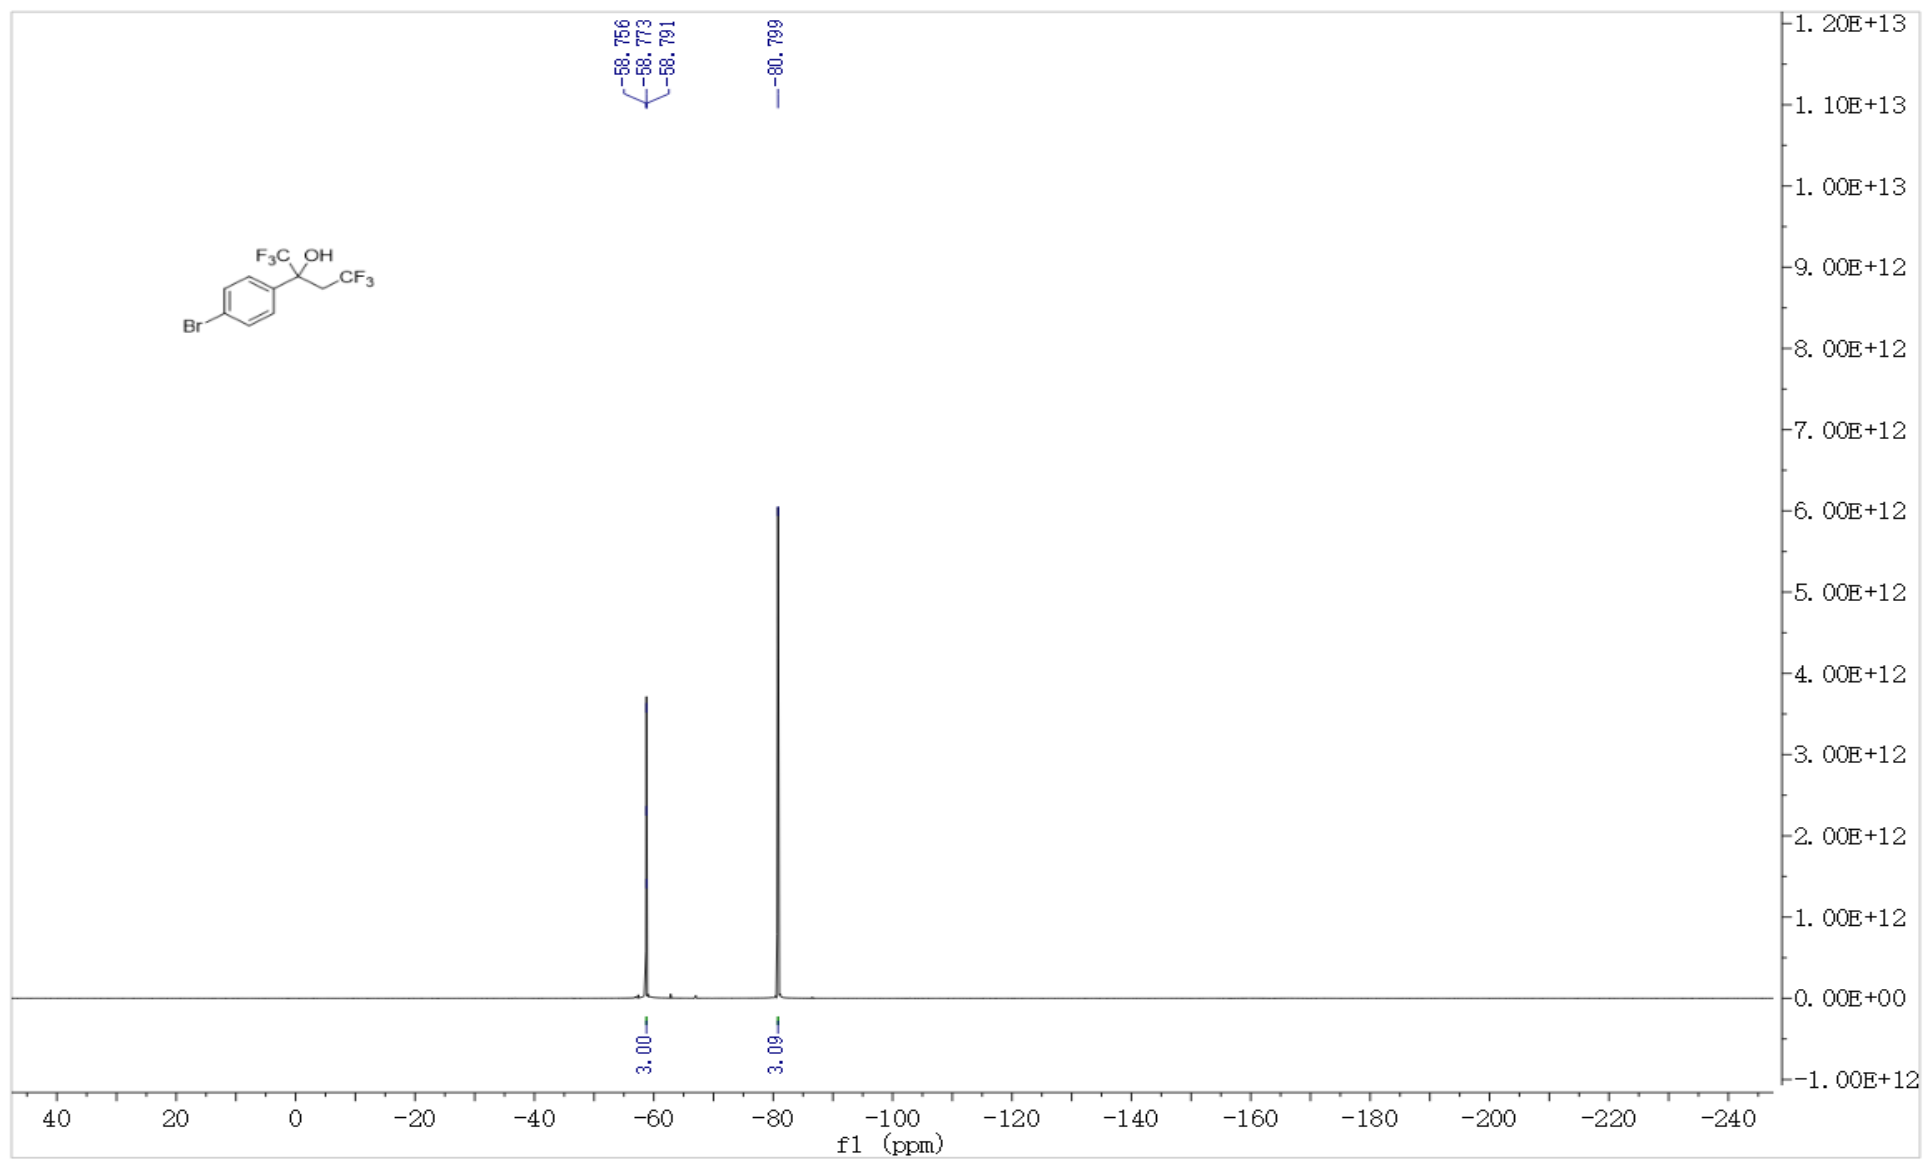

HRMS (EI) spectrum of 2k

CS-LC-P-337

20220483 105 (1.750) Cm (105-(14+23))

Waters GCT Premier

TOF MS EI+  
1.35e4

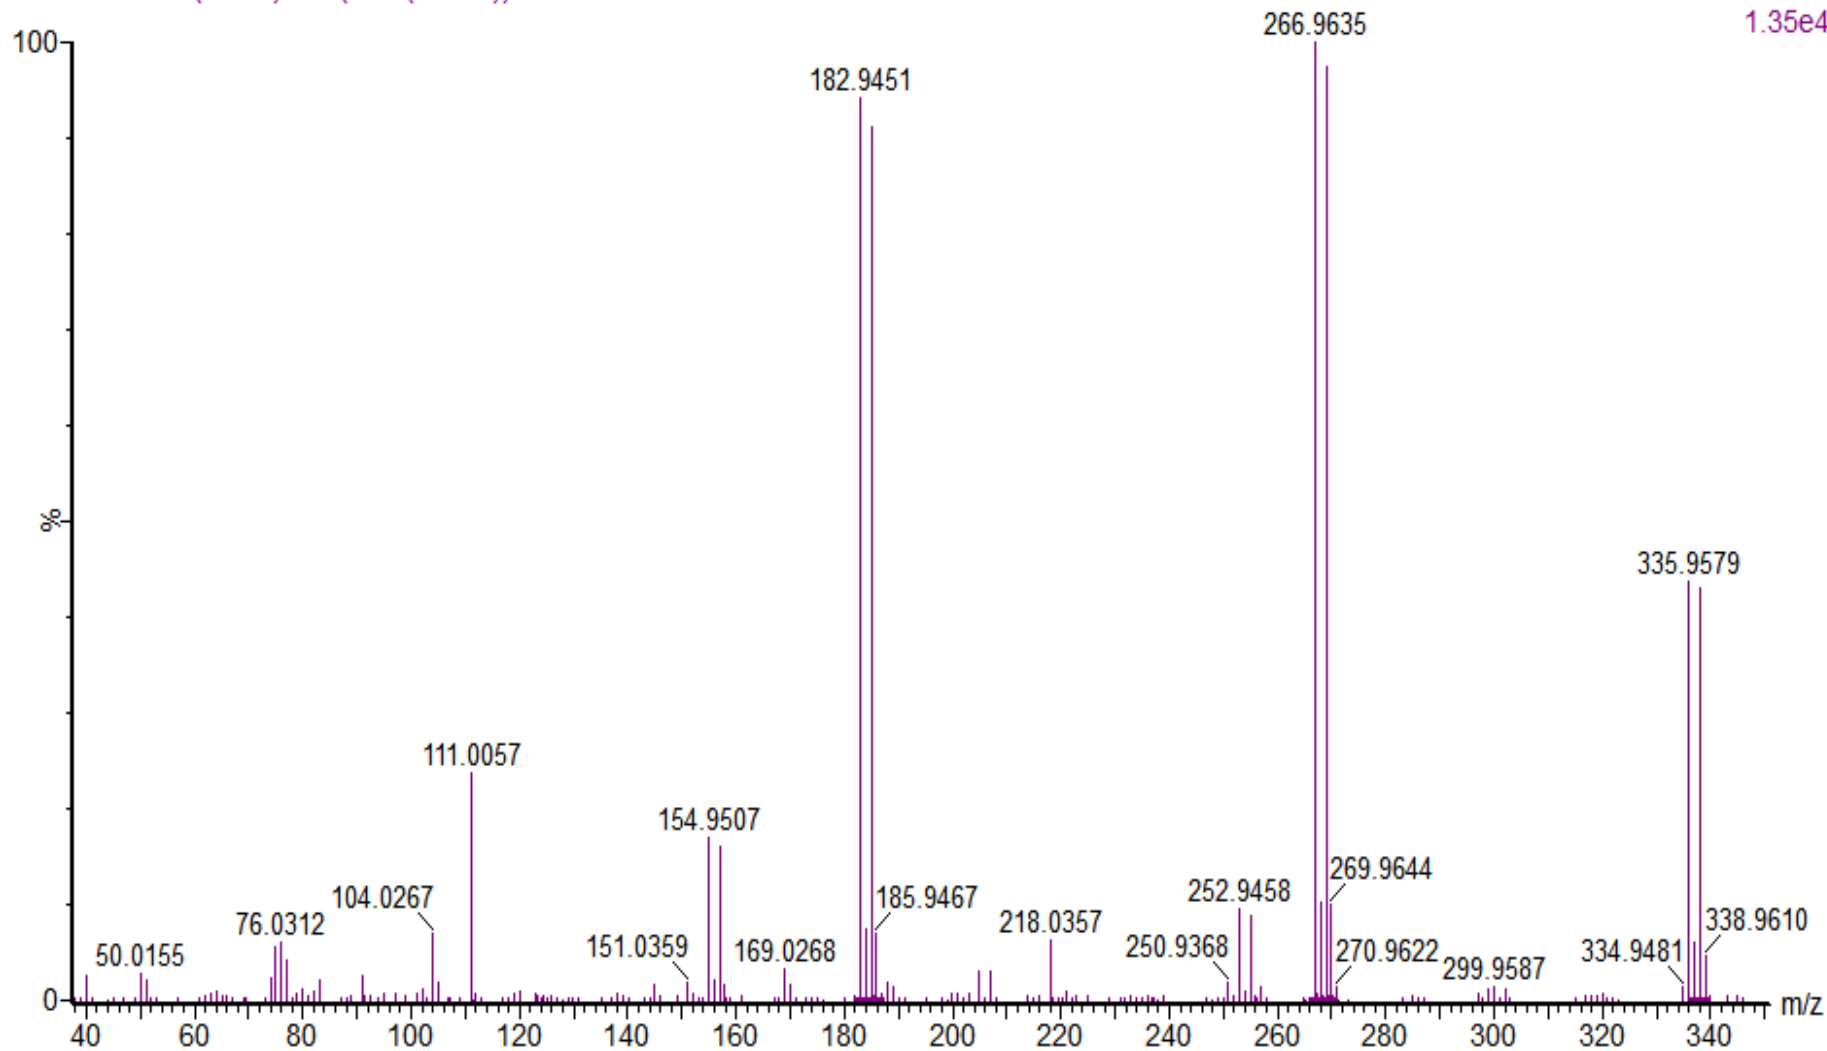

# <sup>1</sup>H NMR spectrum of 2l

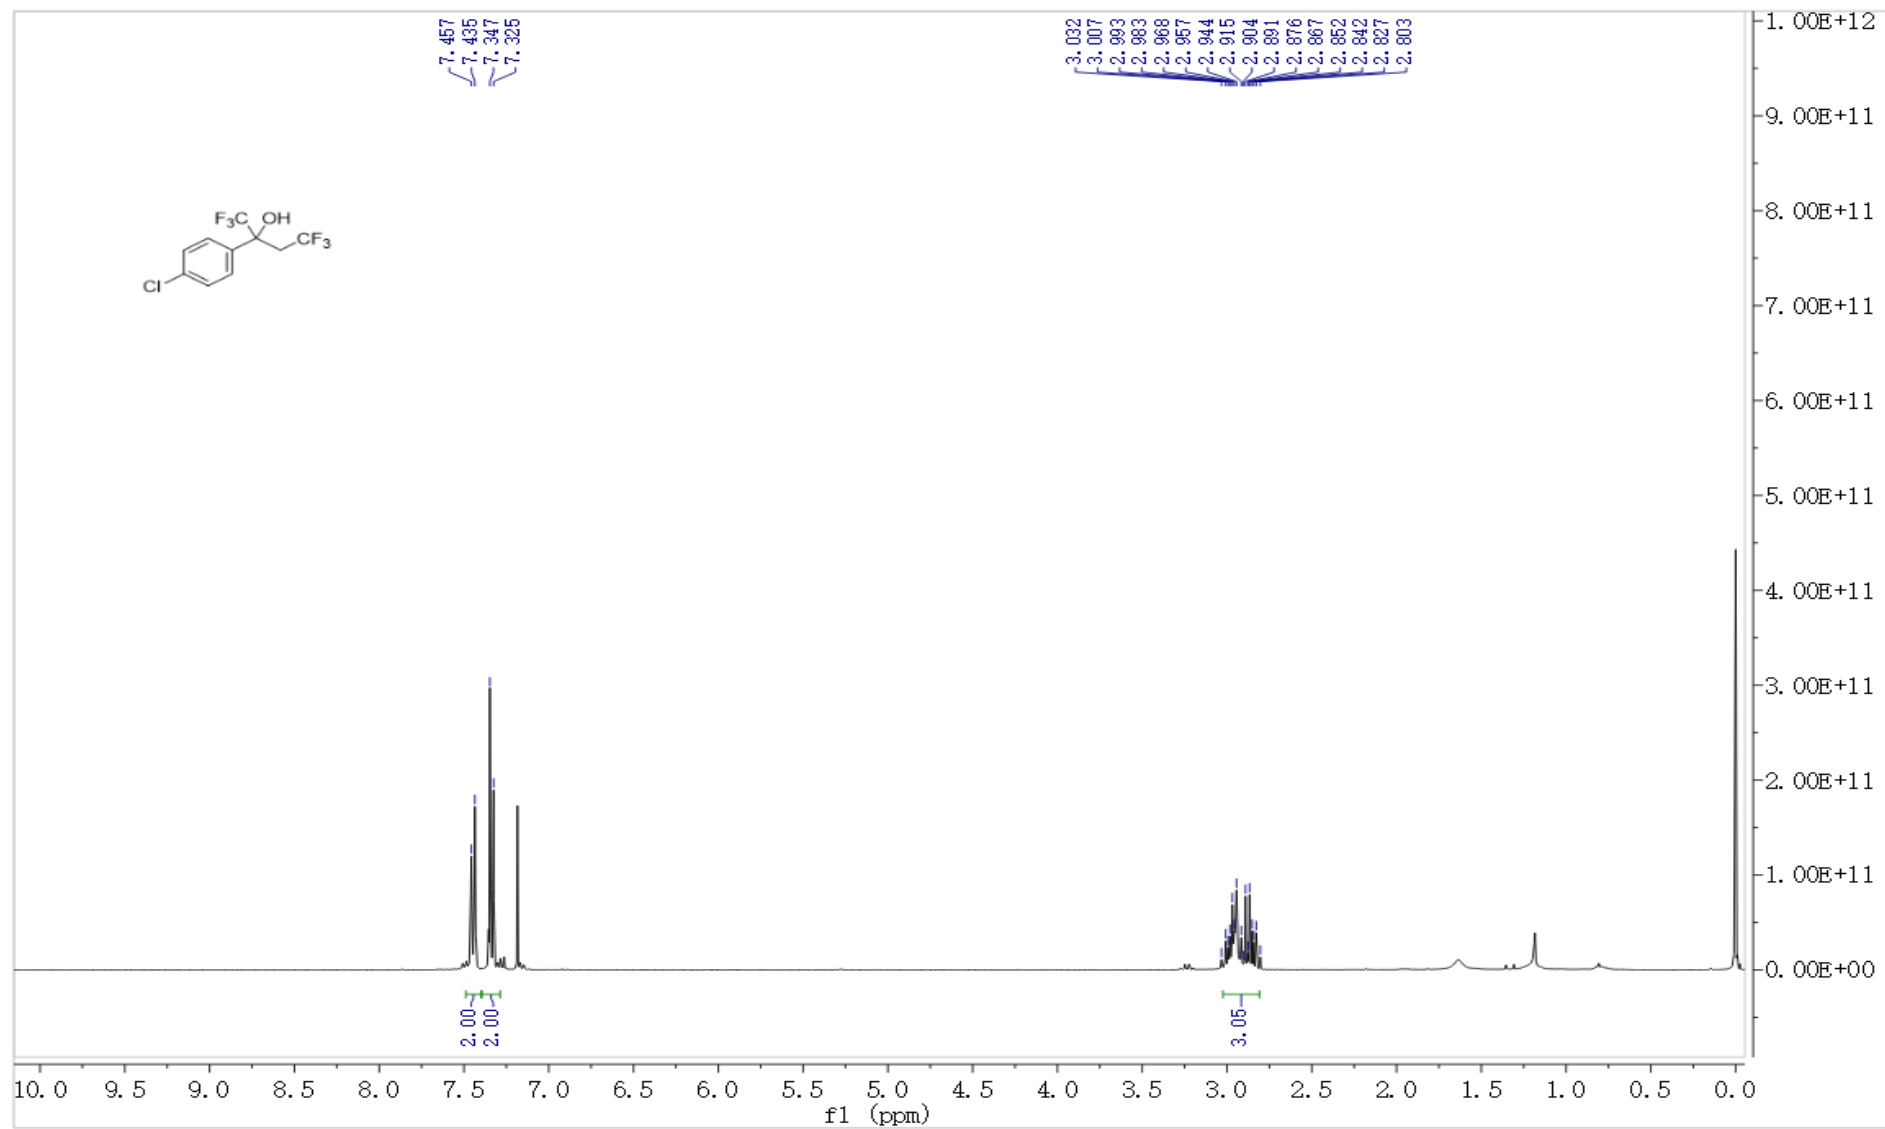

<sup>13</sup>C NMR spectrum of 2l

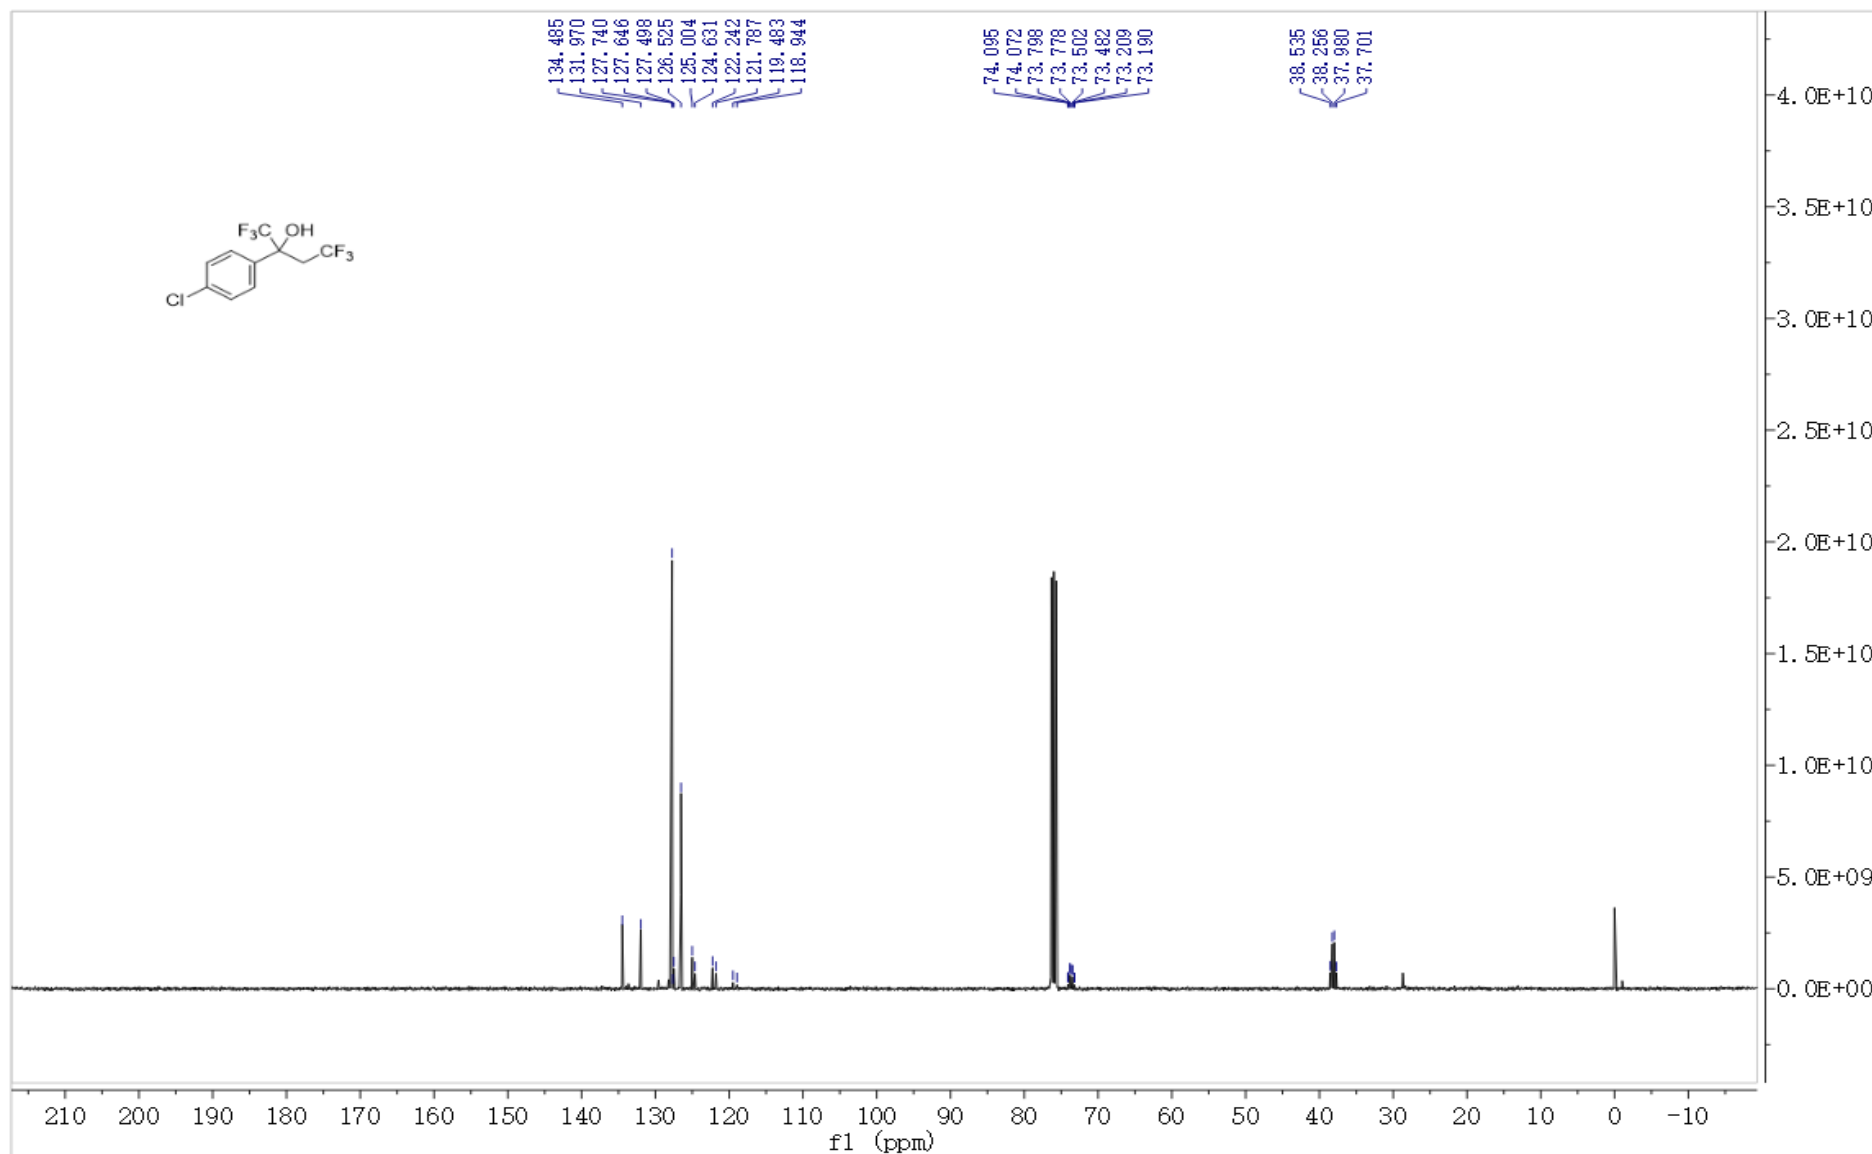



**<sup>19</sup>F NMR spectrum of 2l**

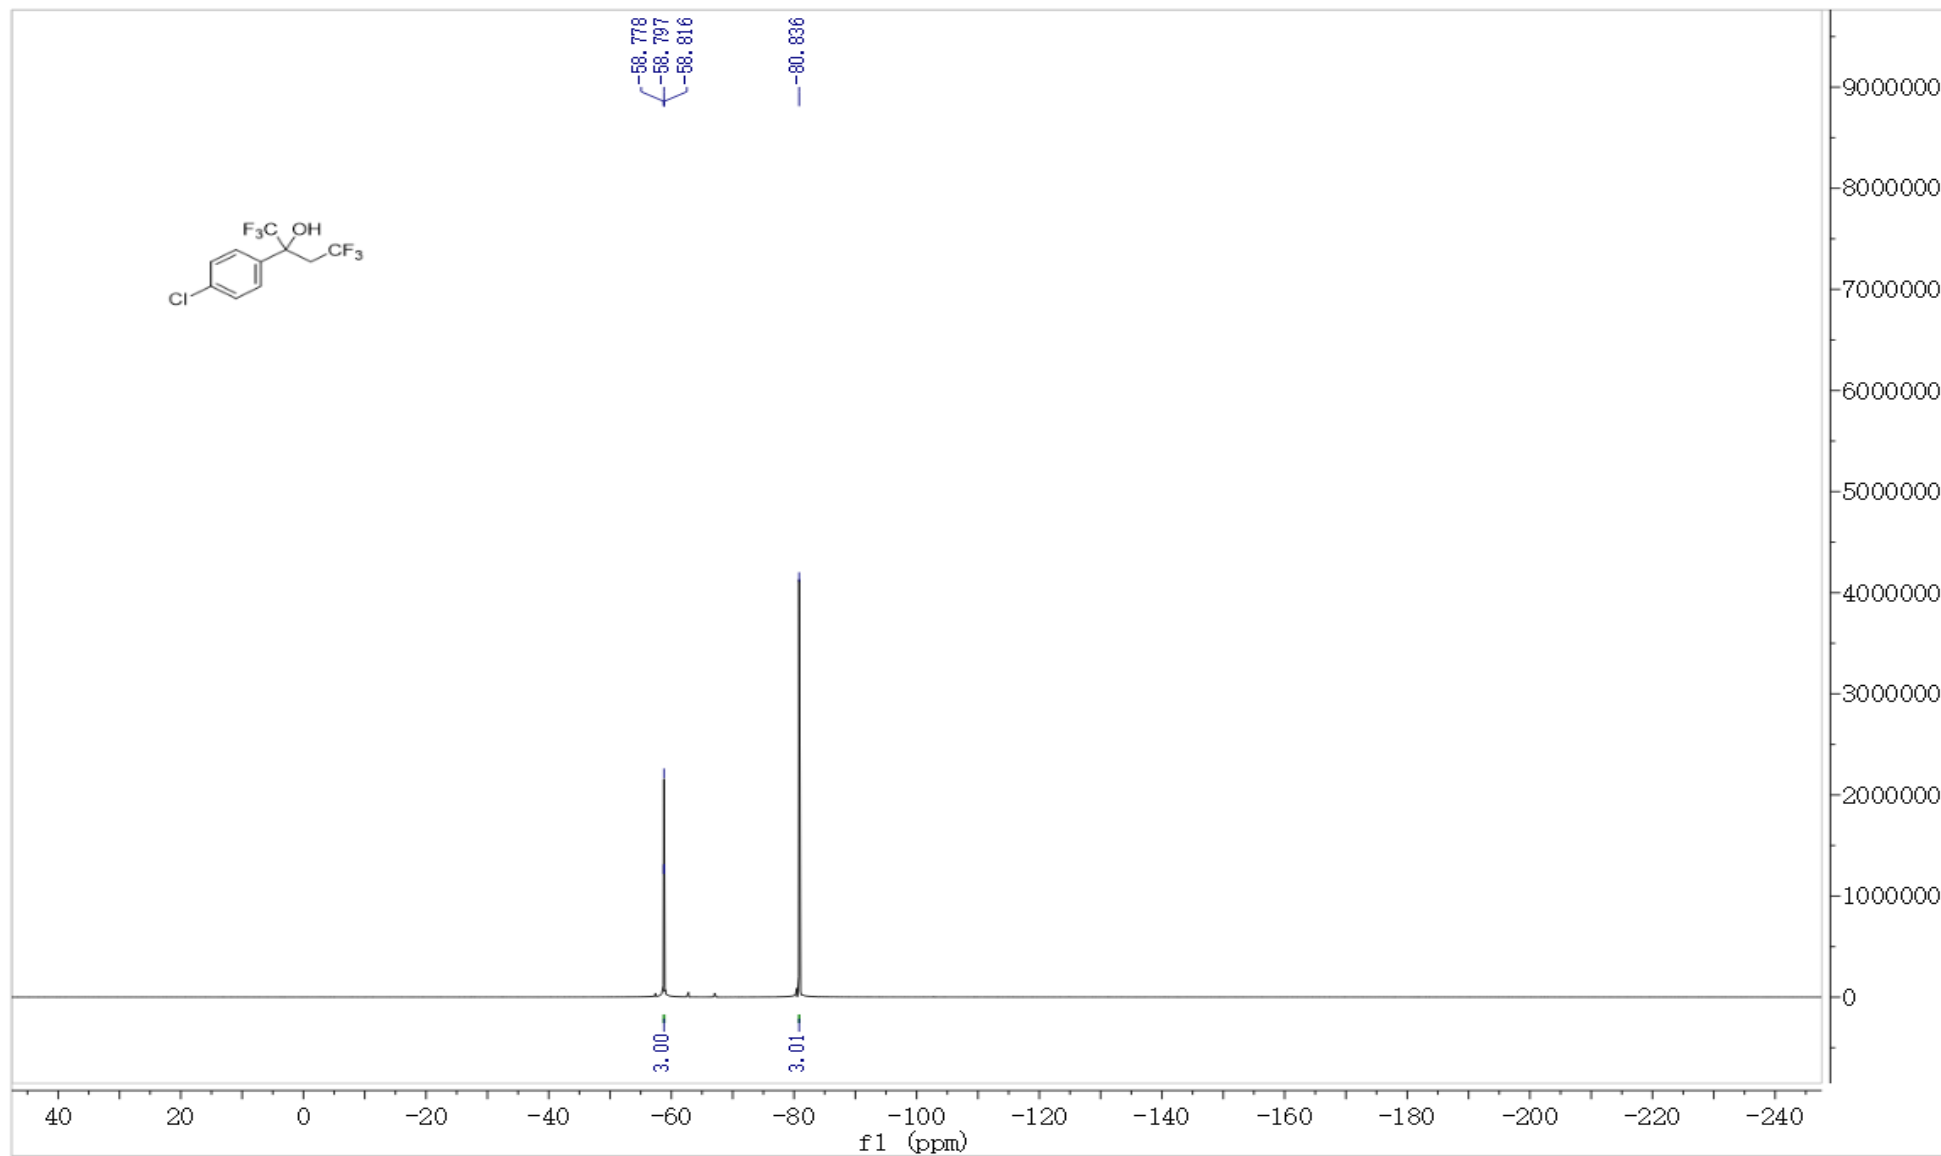

HRMS (EI) spectrum of 2l

CS-LC-P-292

Waters GCT Premier

20220309 256 (4.267) Cm (256-(14+41))

TOF MS EI+  
1.05e4

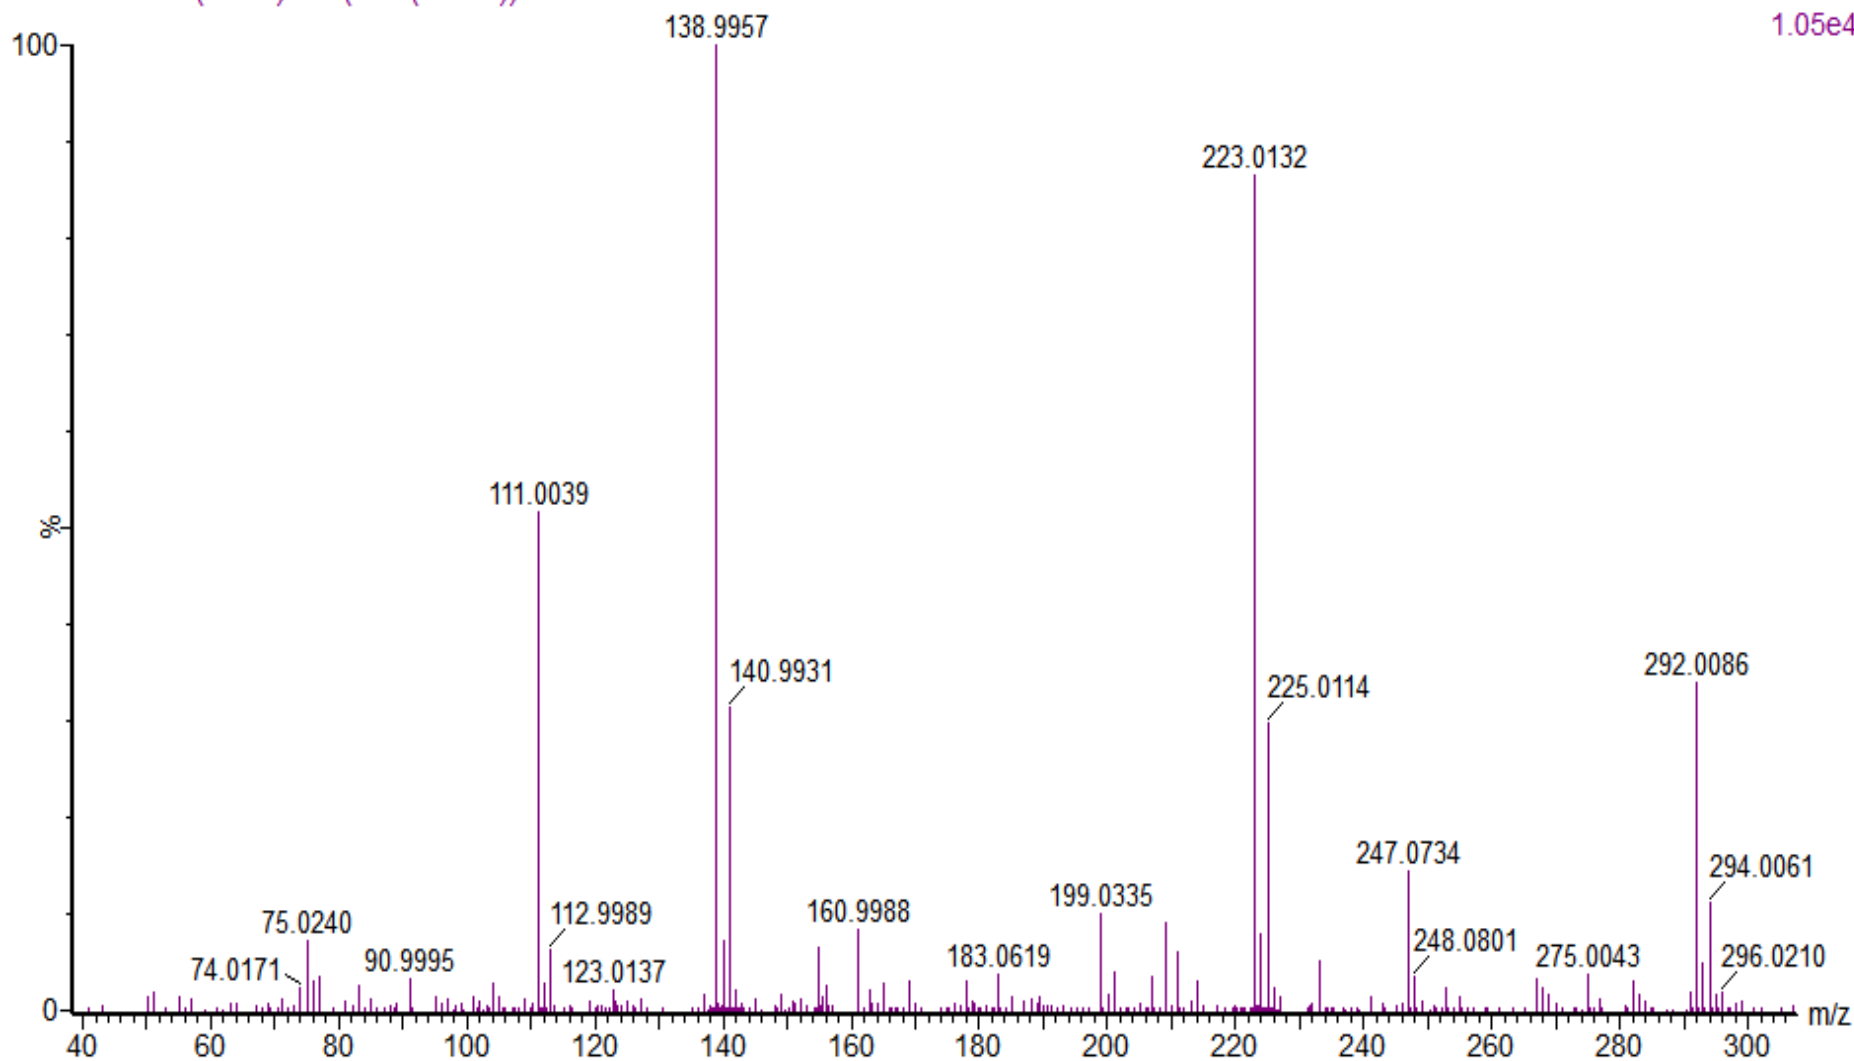

# <sup>1</sup>H NMR spectrum of 2m

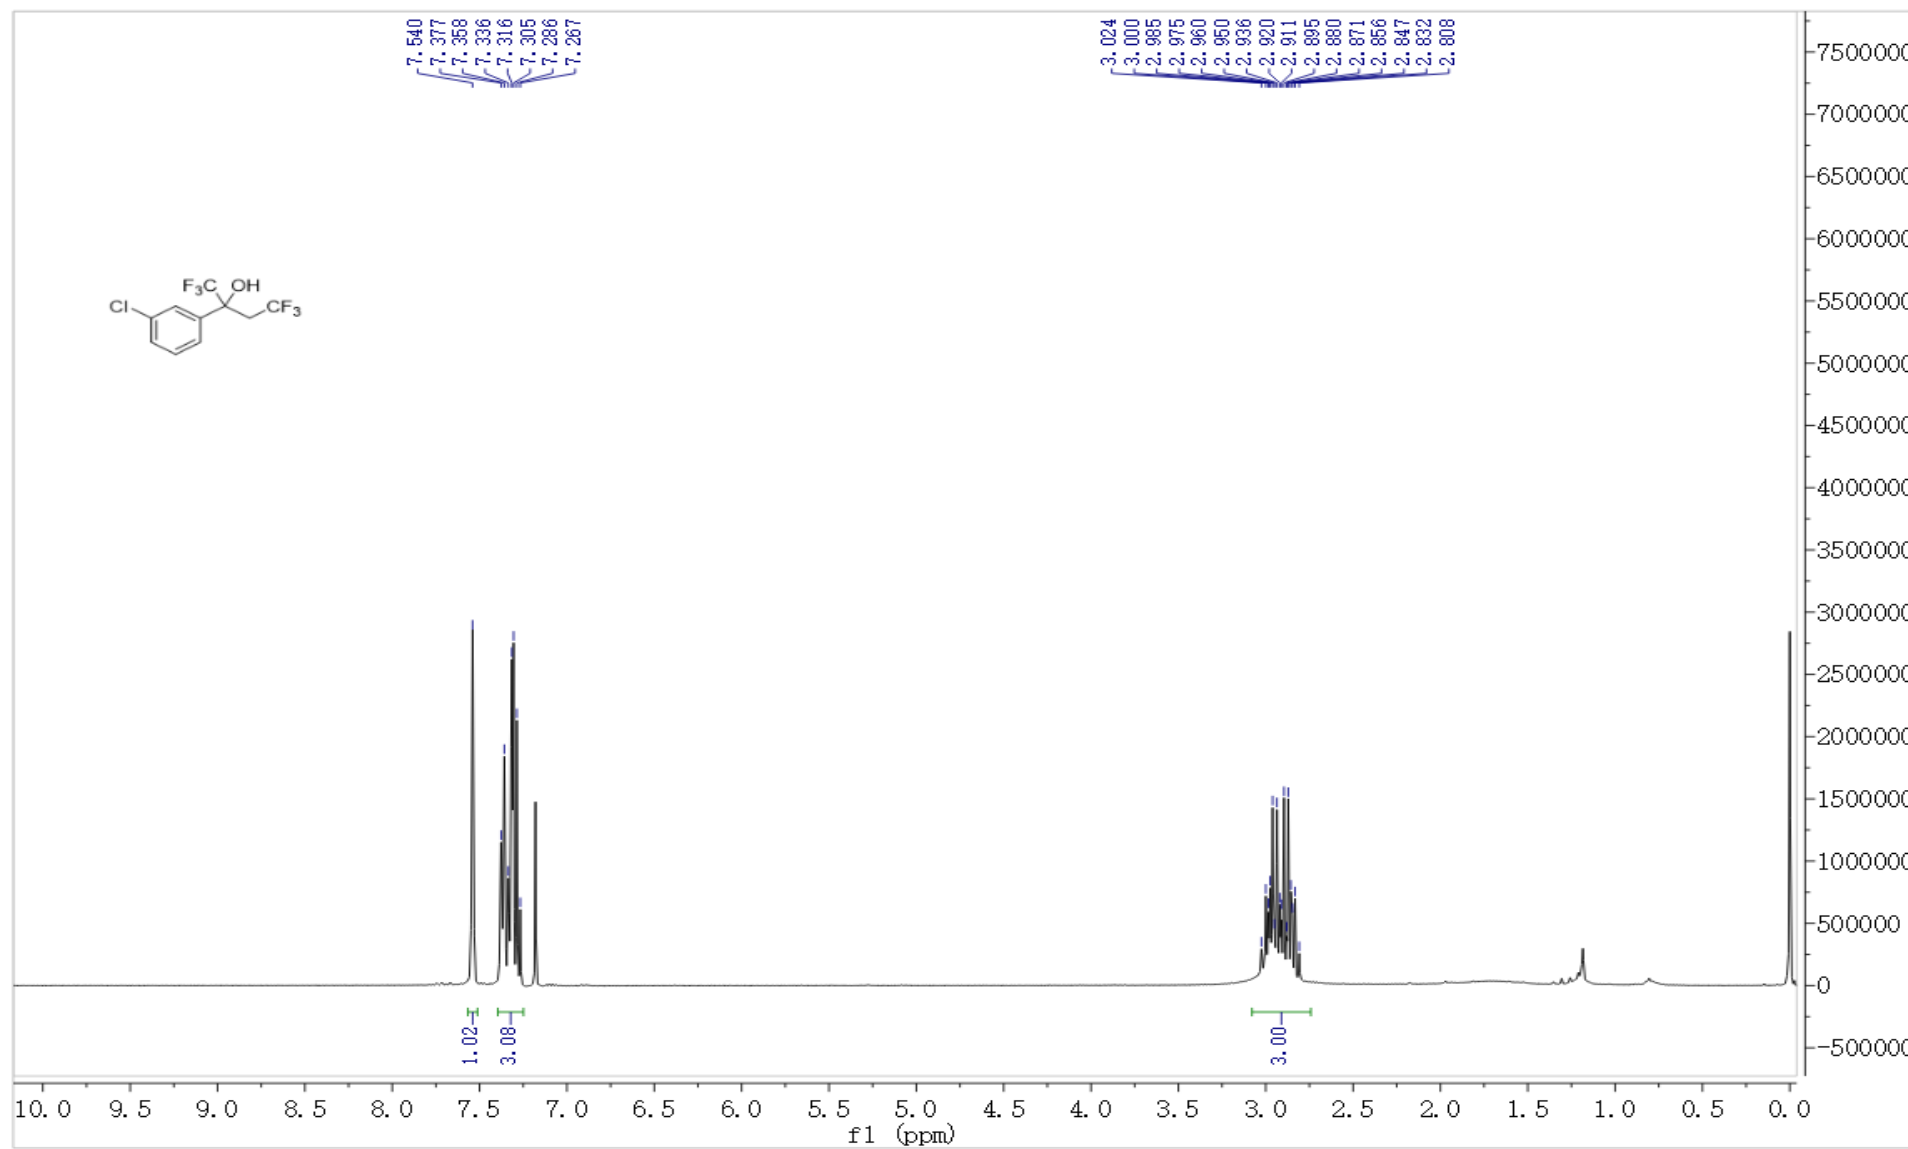

<sup>13</sup>C NMR spectrum of 2m

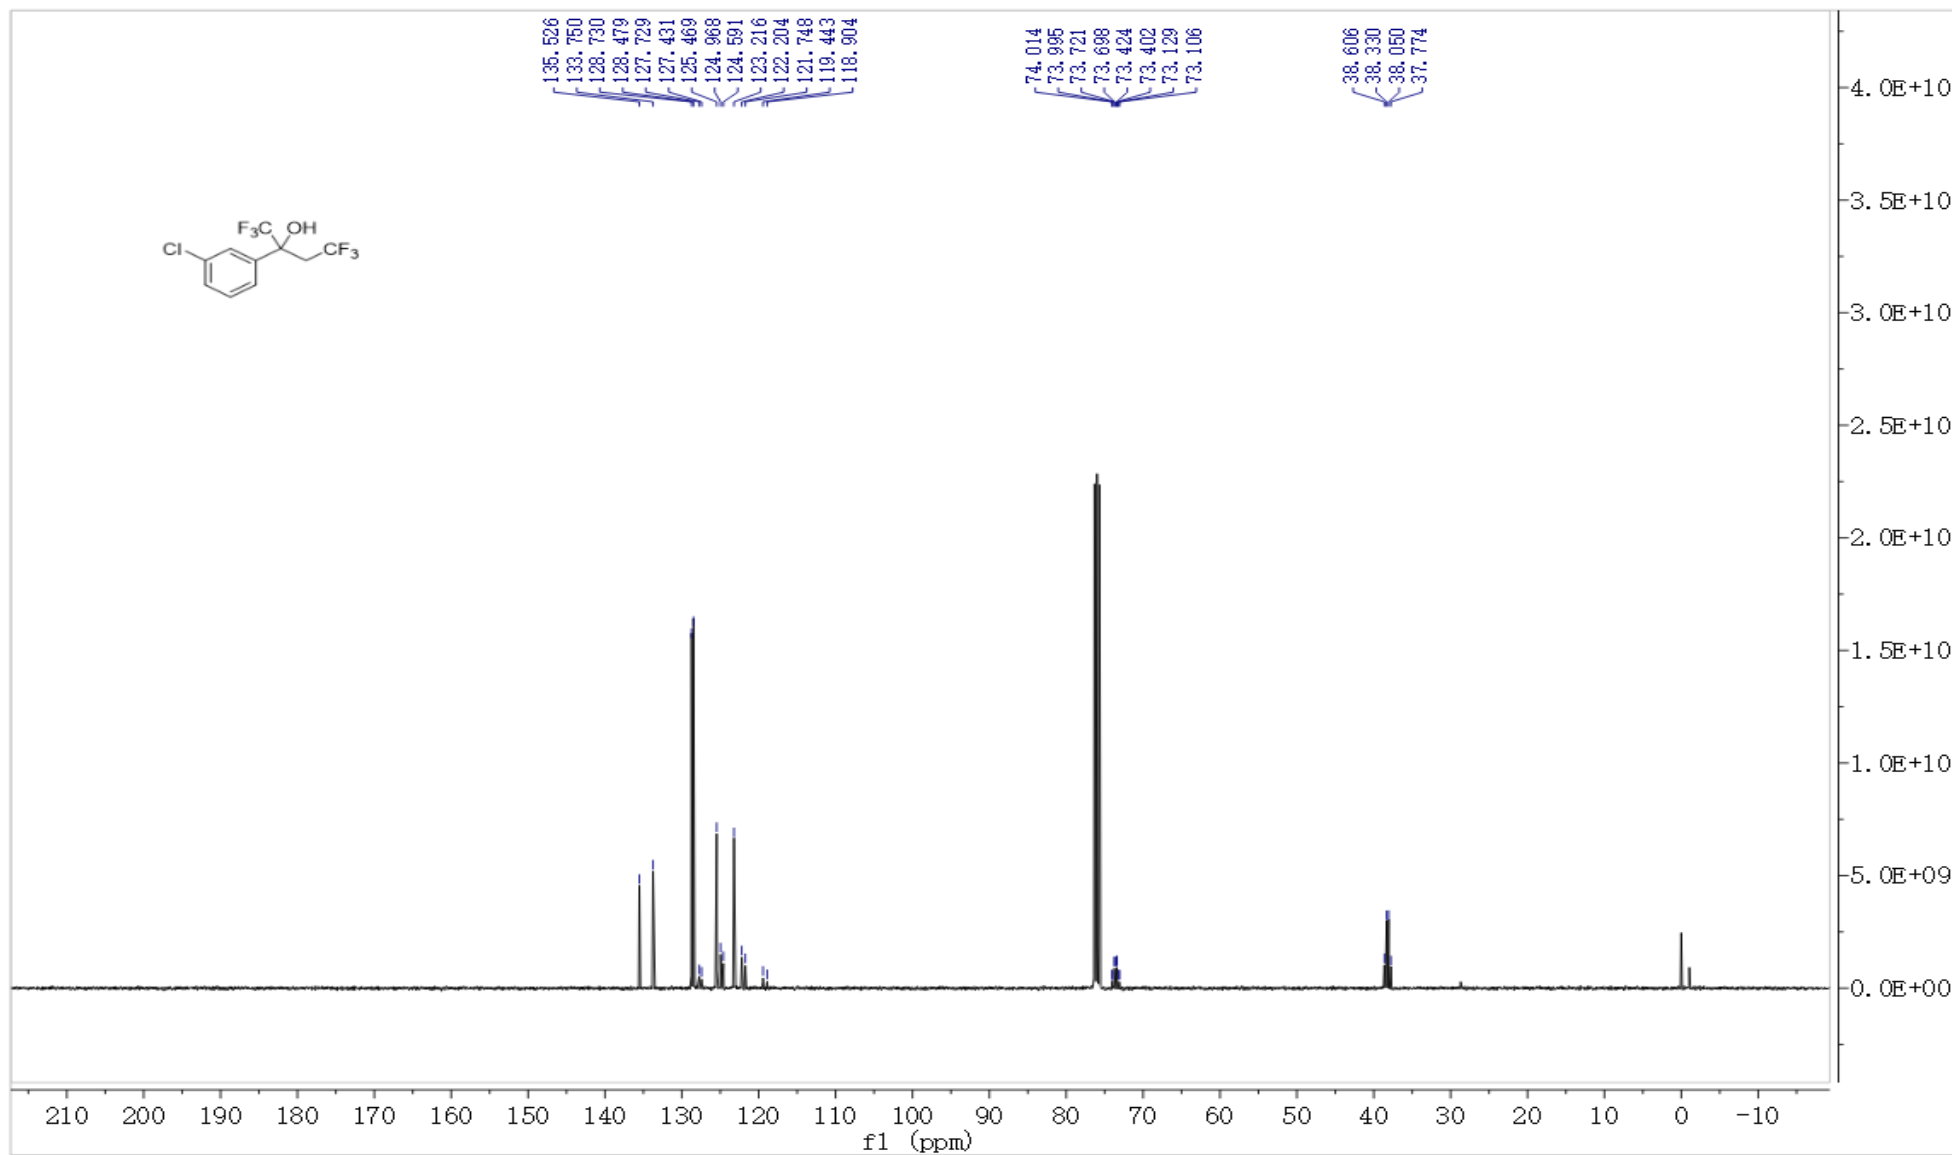

**<sup>19</sup>F NMR spectrum of 2m**

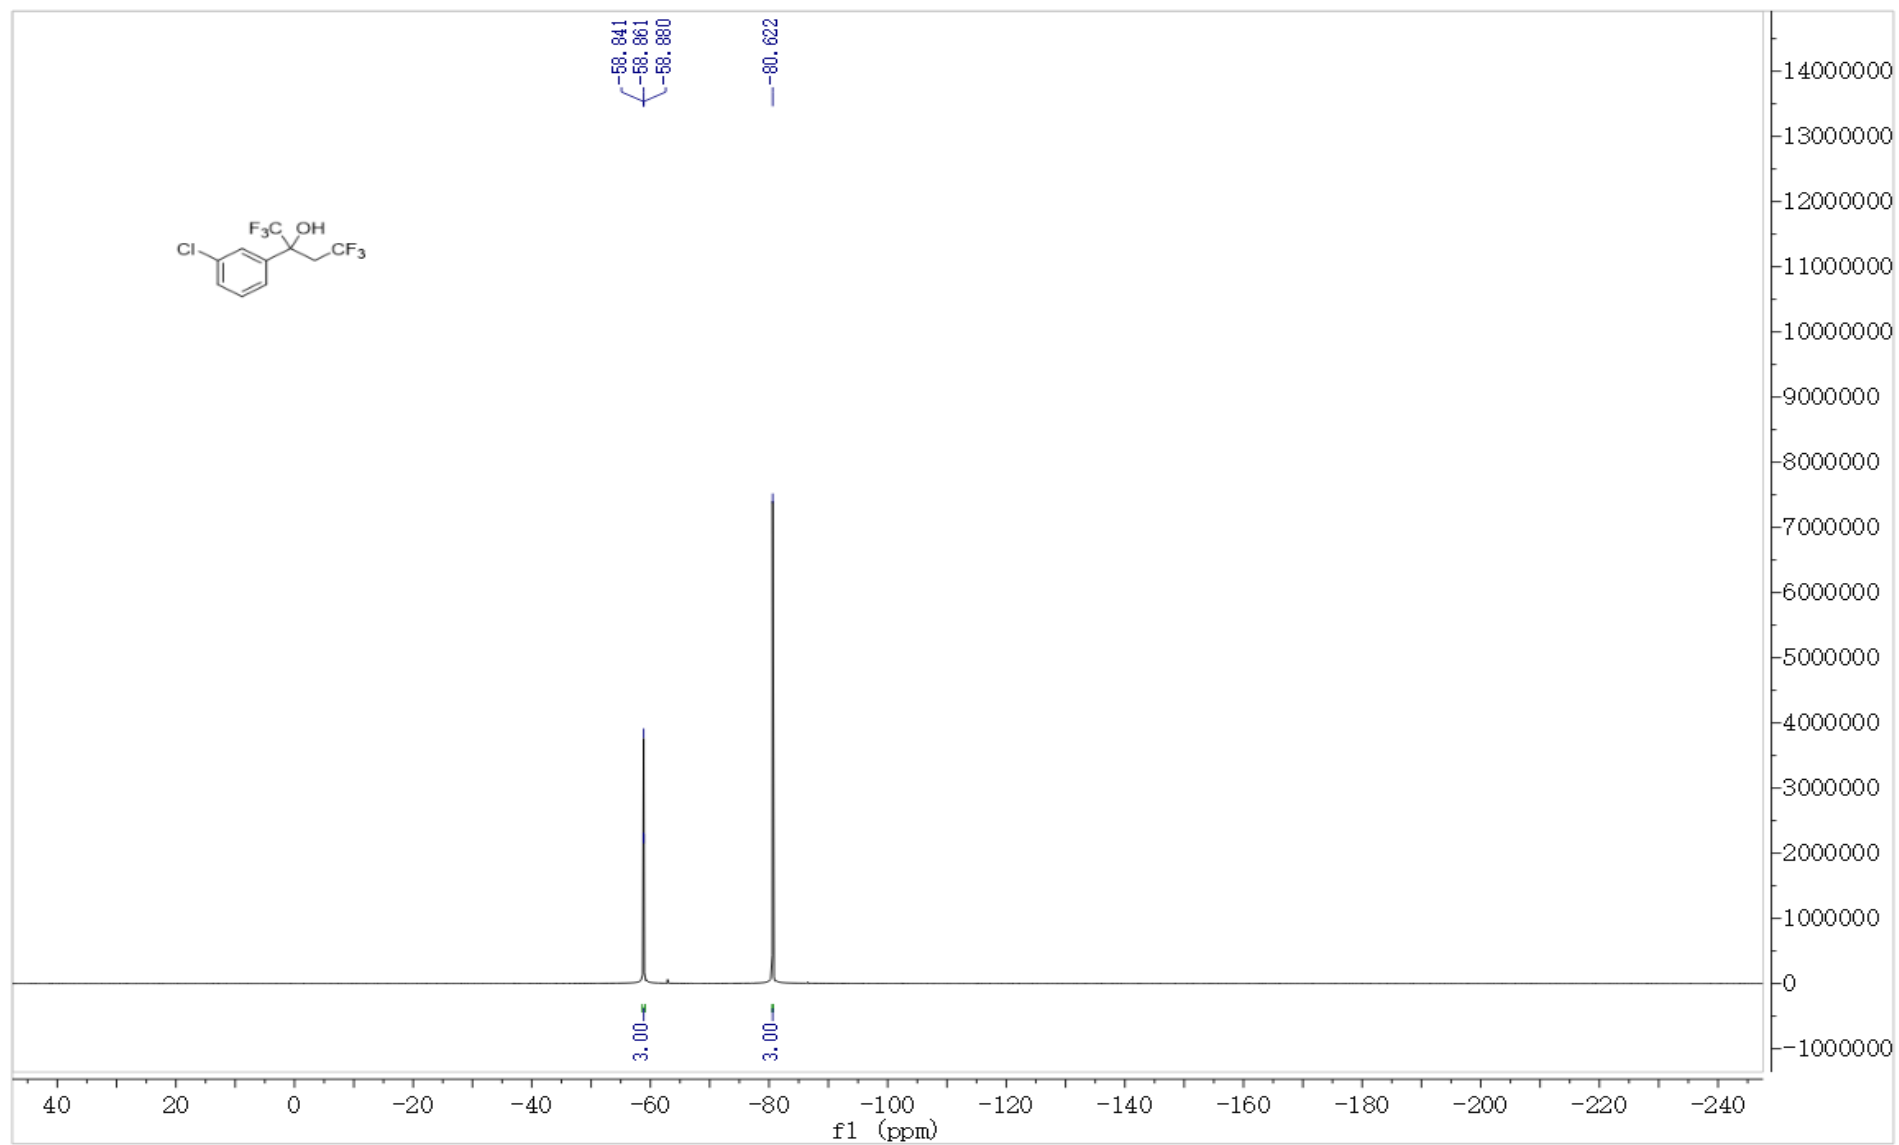

HRMS (EI) spectrum of 2m

CS-LC-M-292

20220304 74 (1.233) Cm (74-(4+5))

Waters GCT Premier

TOF MS EI+  
1.43e4

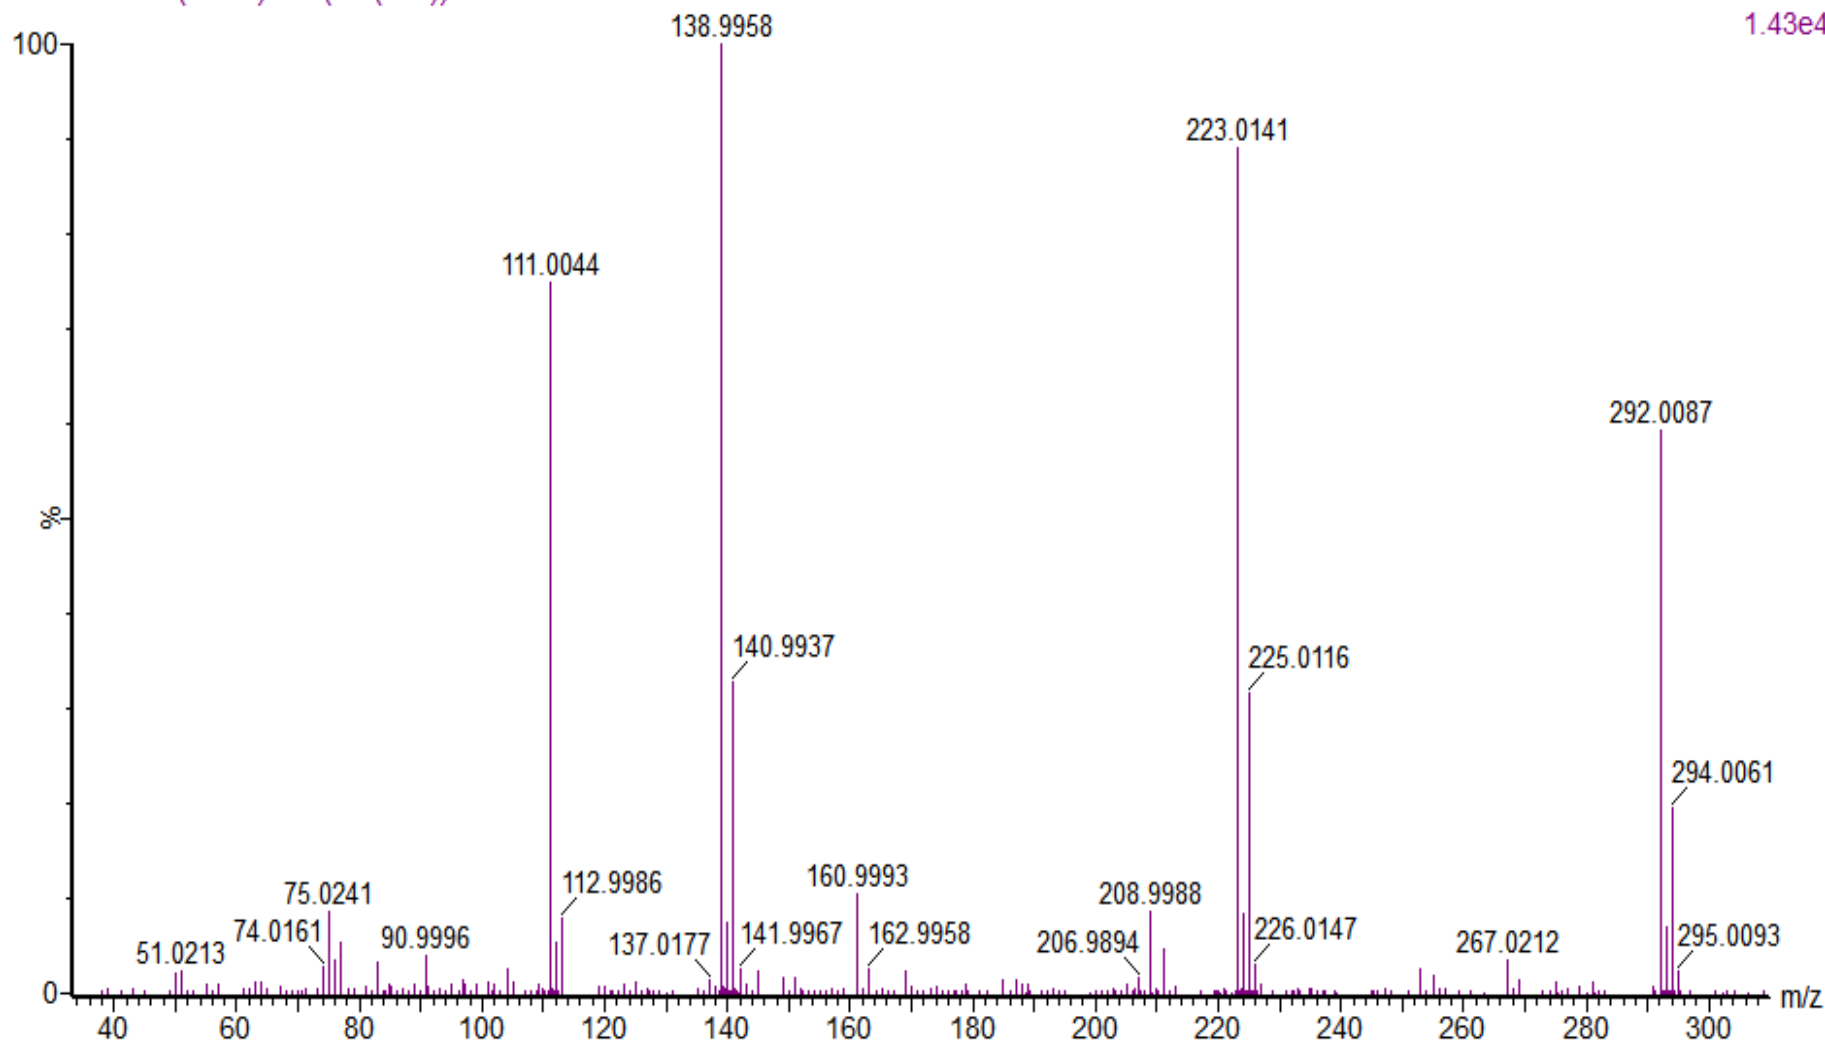

<sup>1</sup>H NMR spectrum of 2n

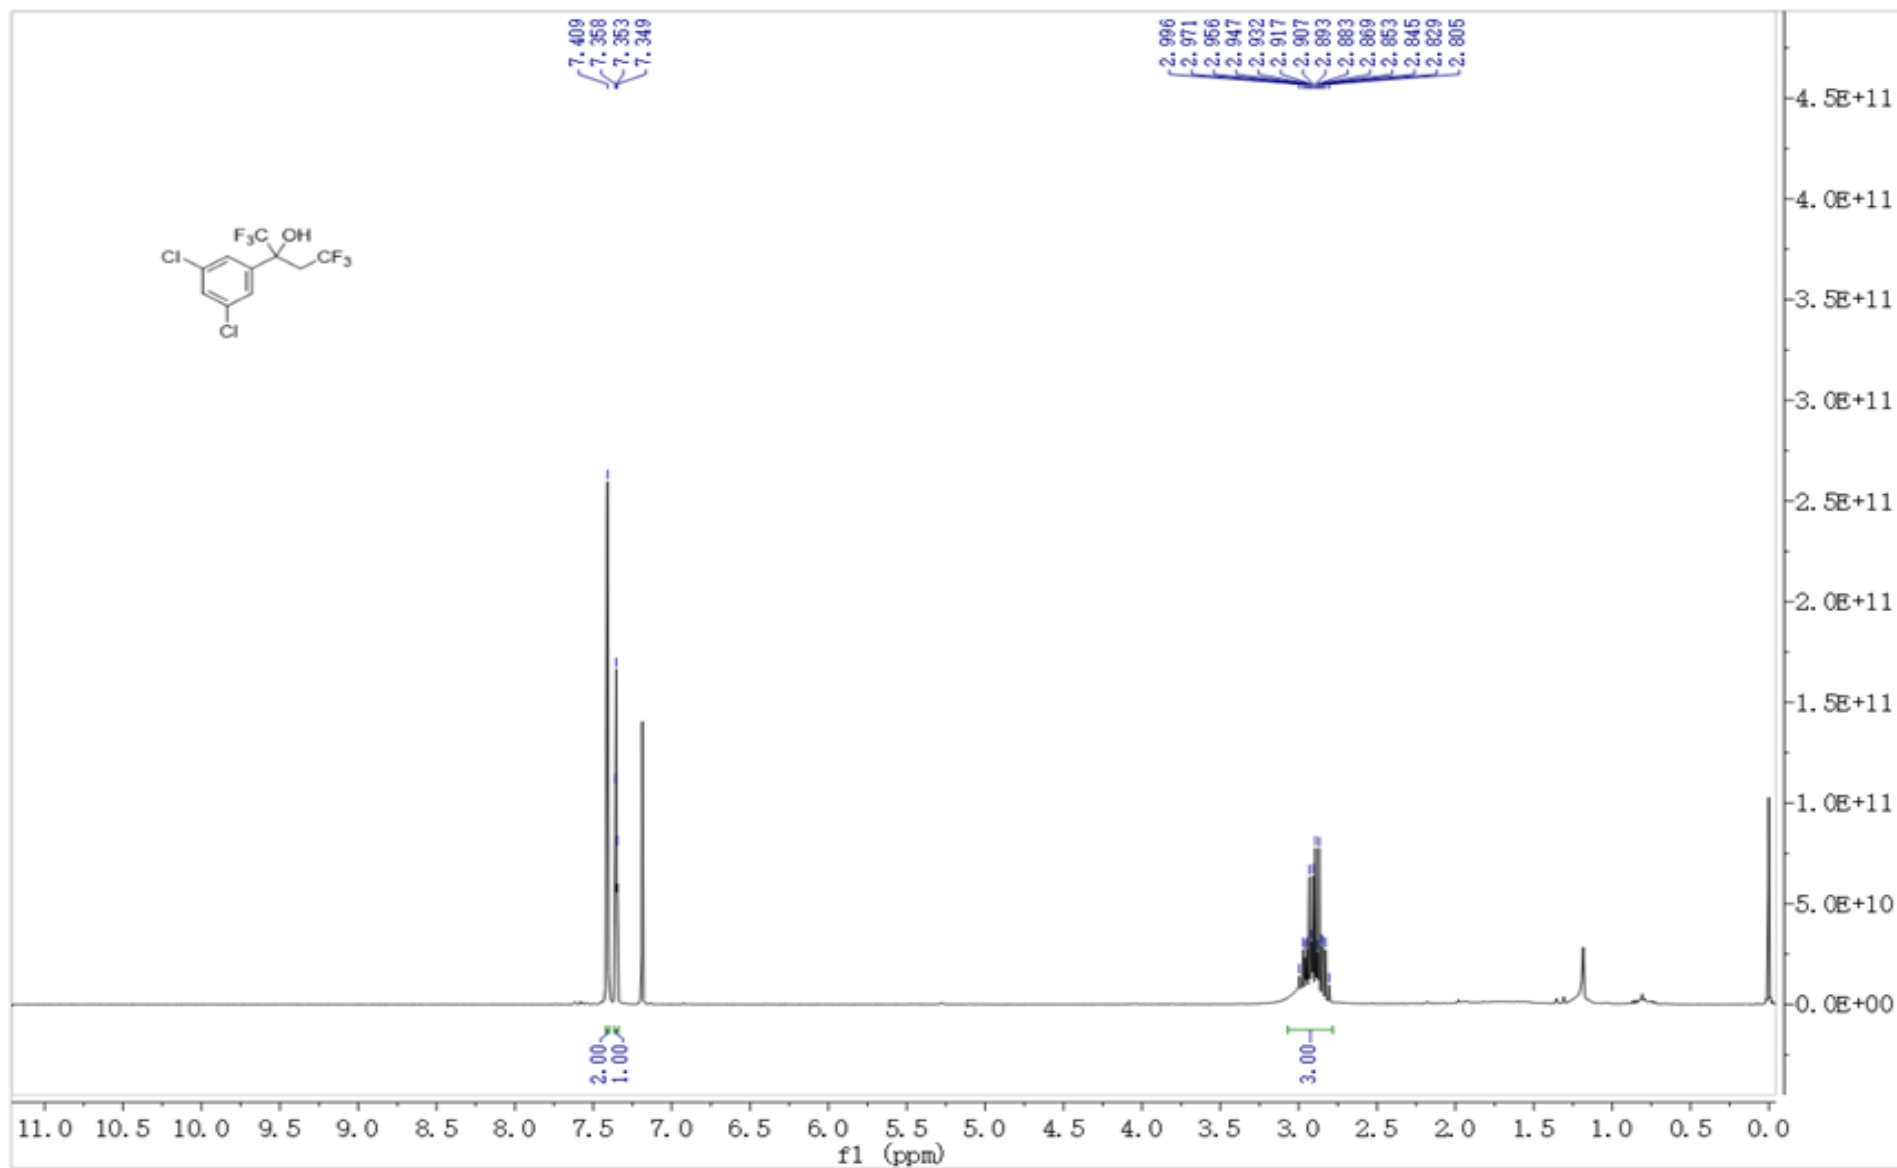

<sup>13</sup>C NMR spectrum of 2n

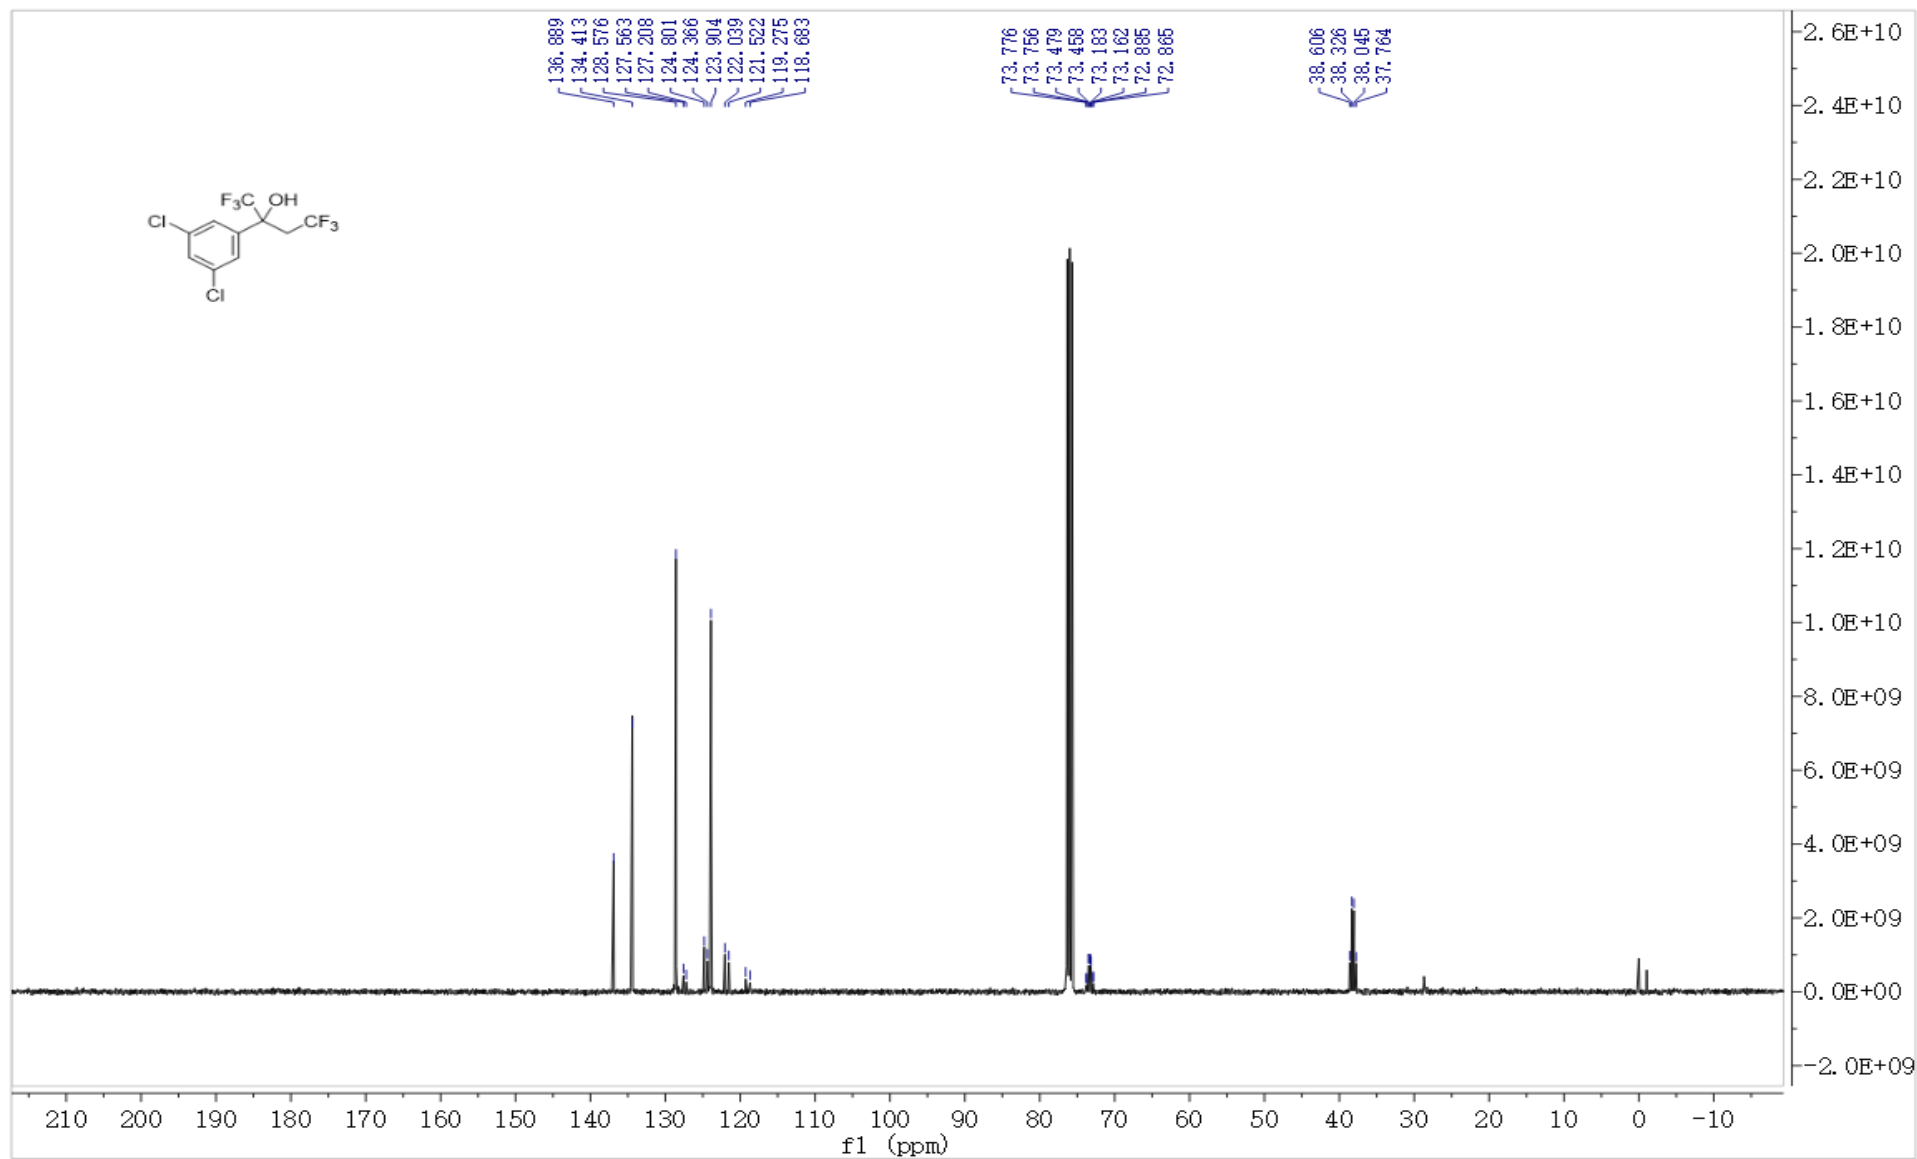



**<sup>19</sup>F NMR spectrum of 2n**

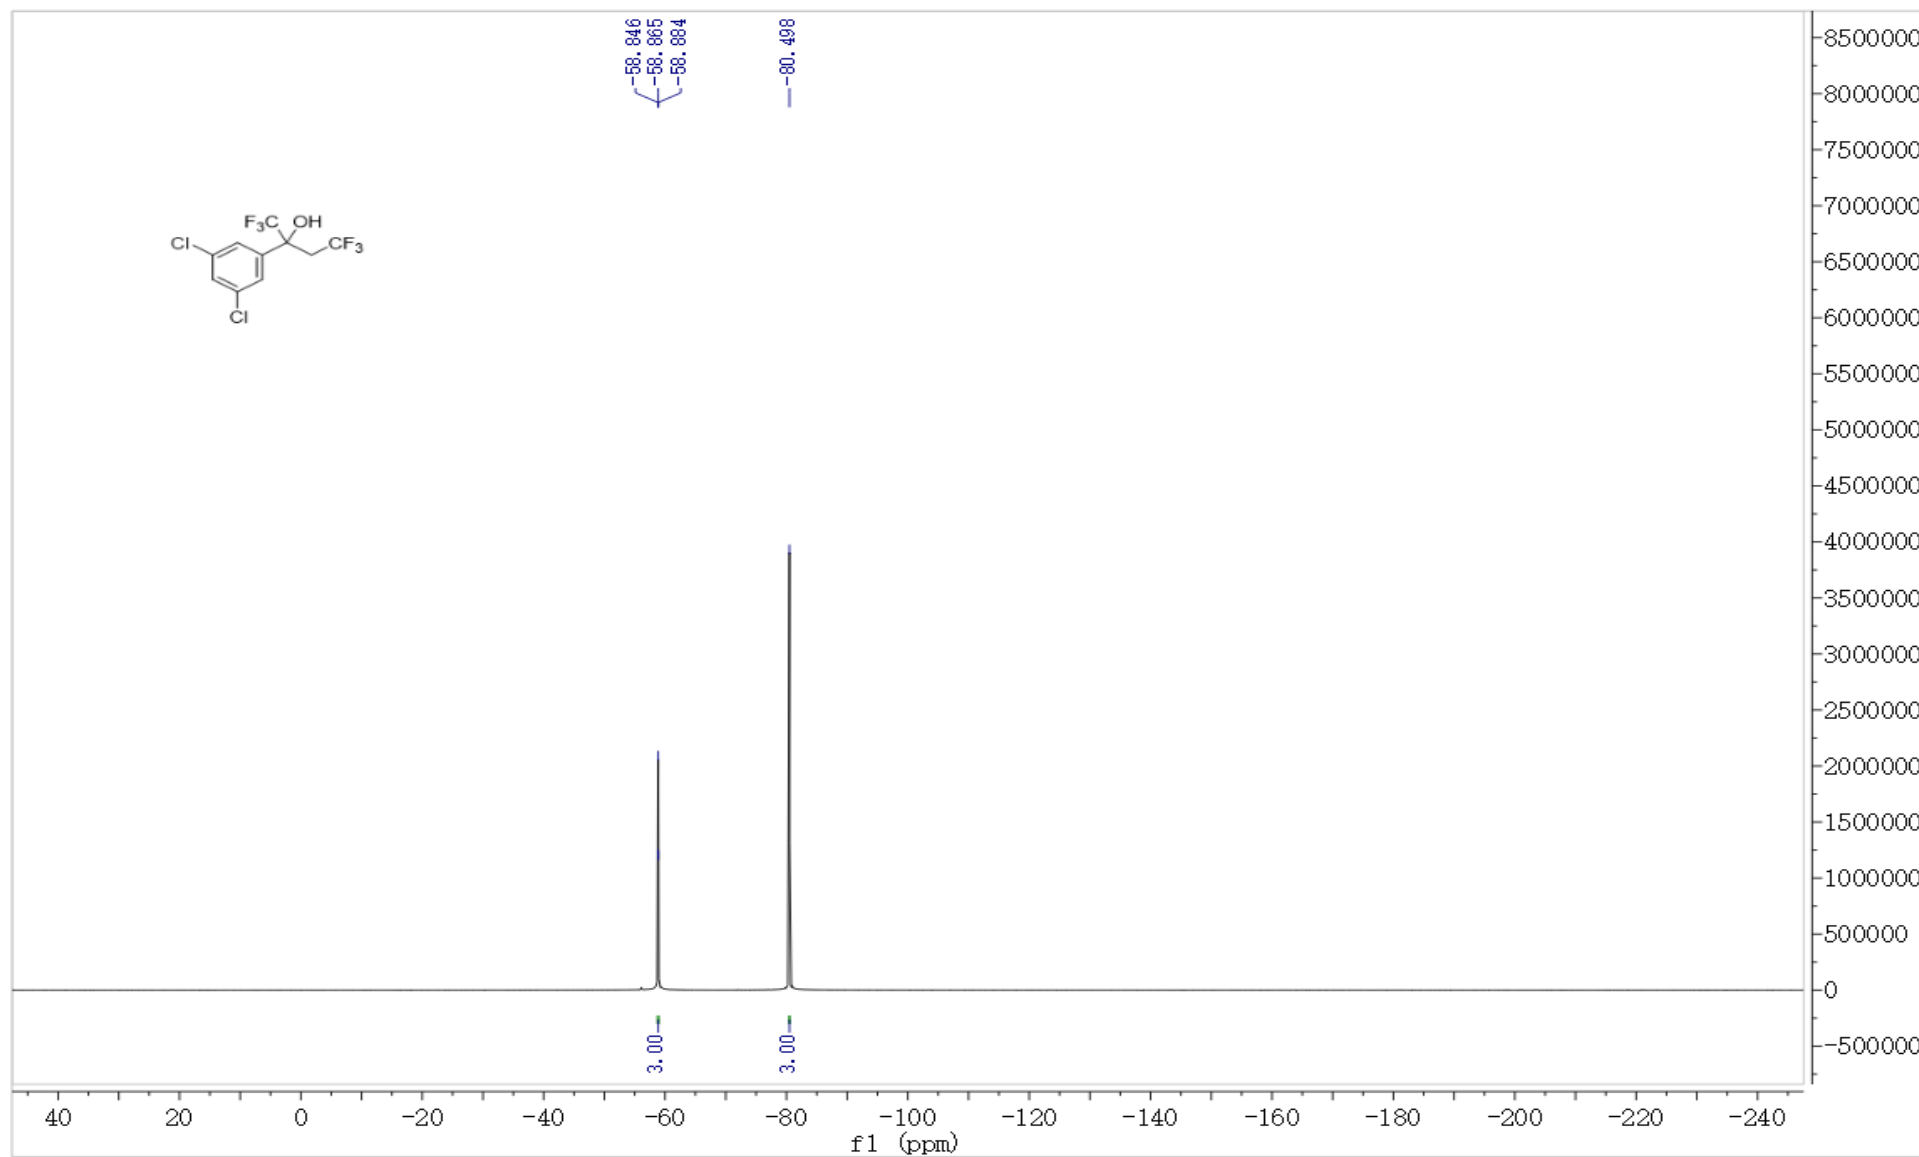

HRMS (EI) spectrum of 2n

CS-LC-P-327

20220303 160 (2.667) Cm (160-(26+52))

Waters GCT Premier

TOF MS EI+  
1.10e4

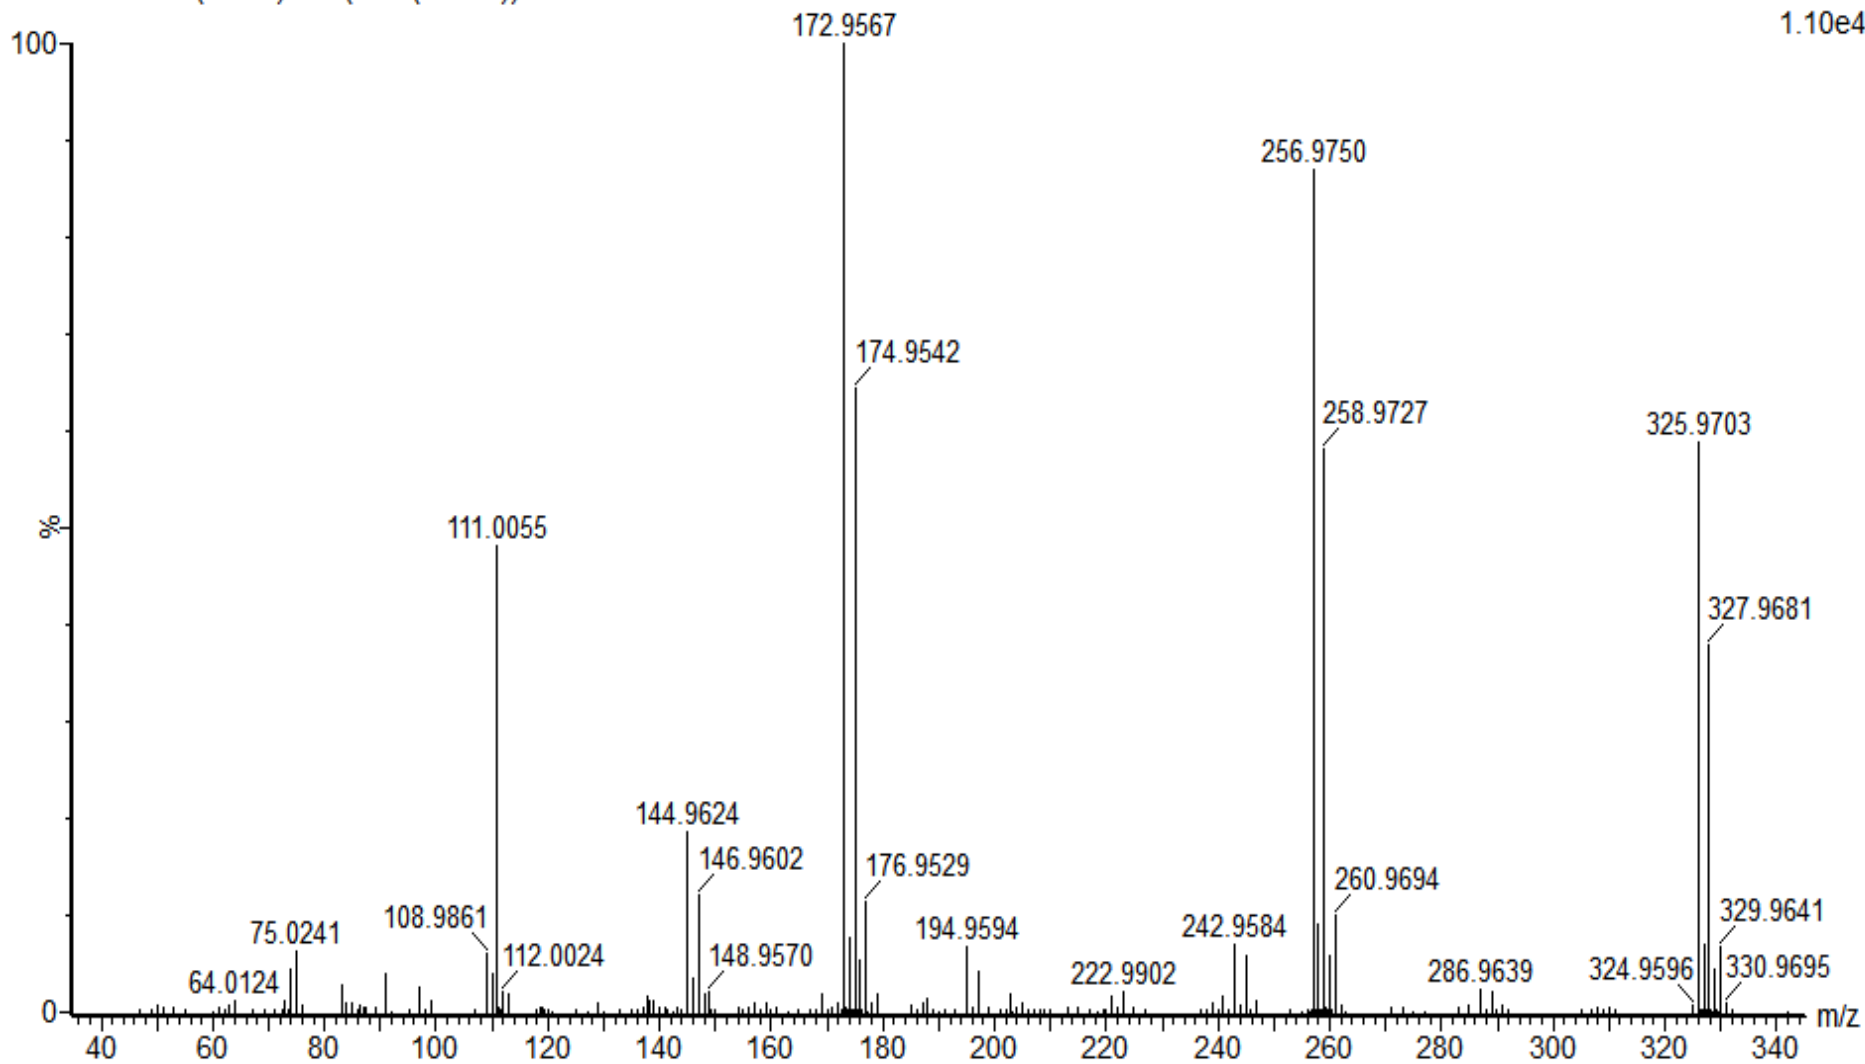

# <sup>1</sup>H NMR spectrum of 2o

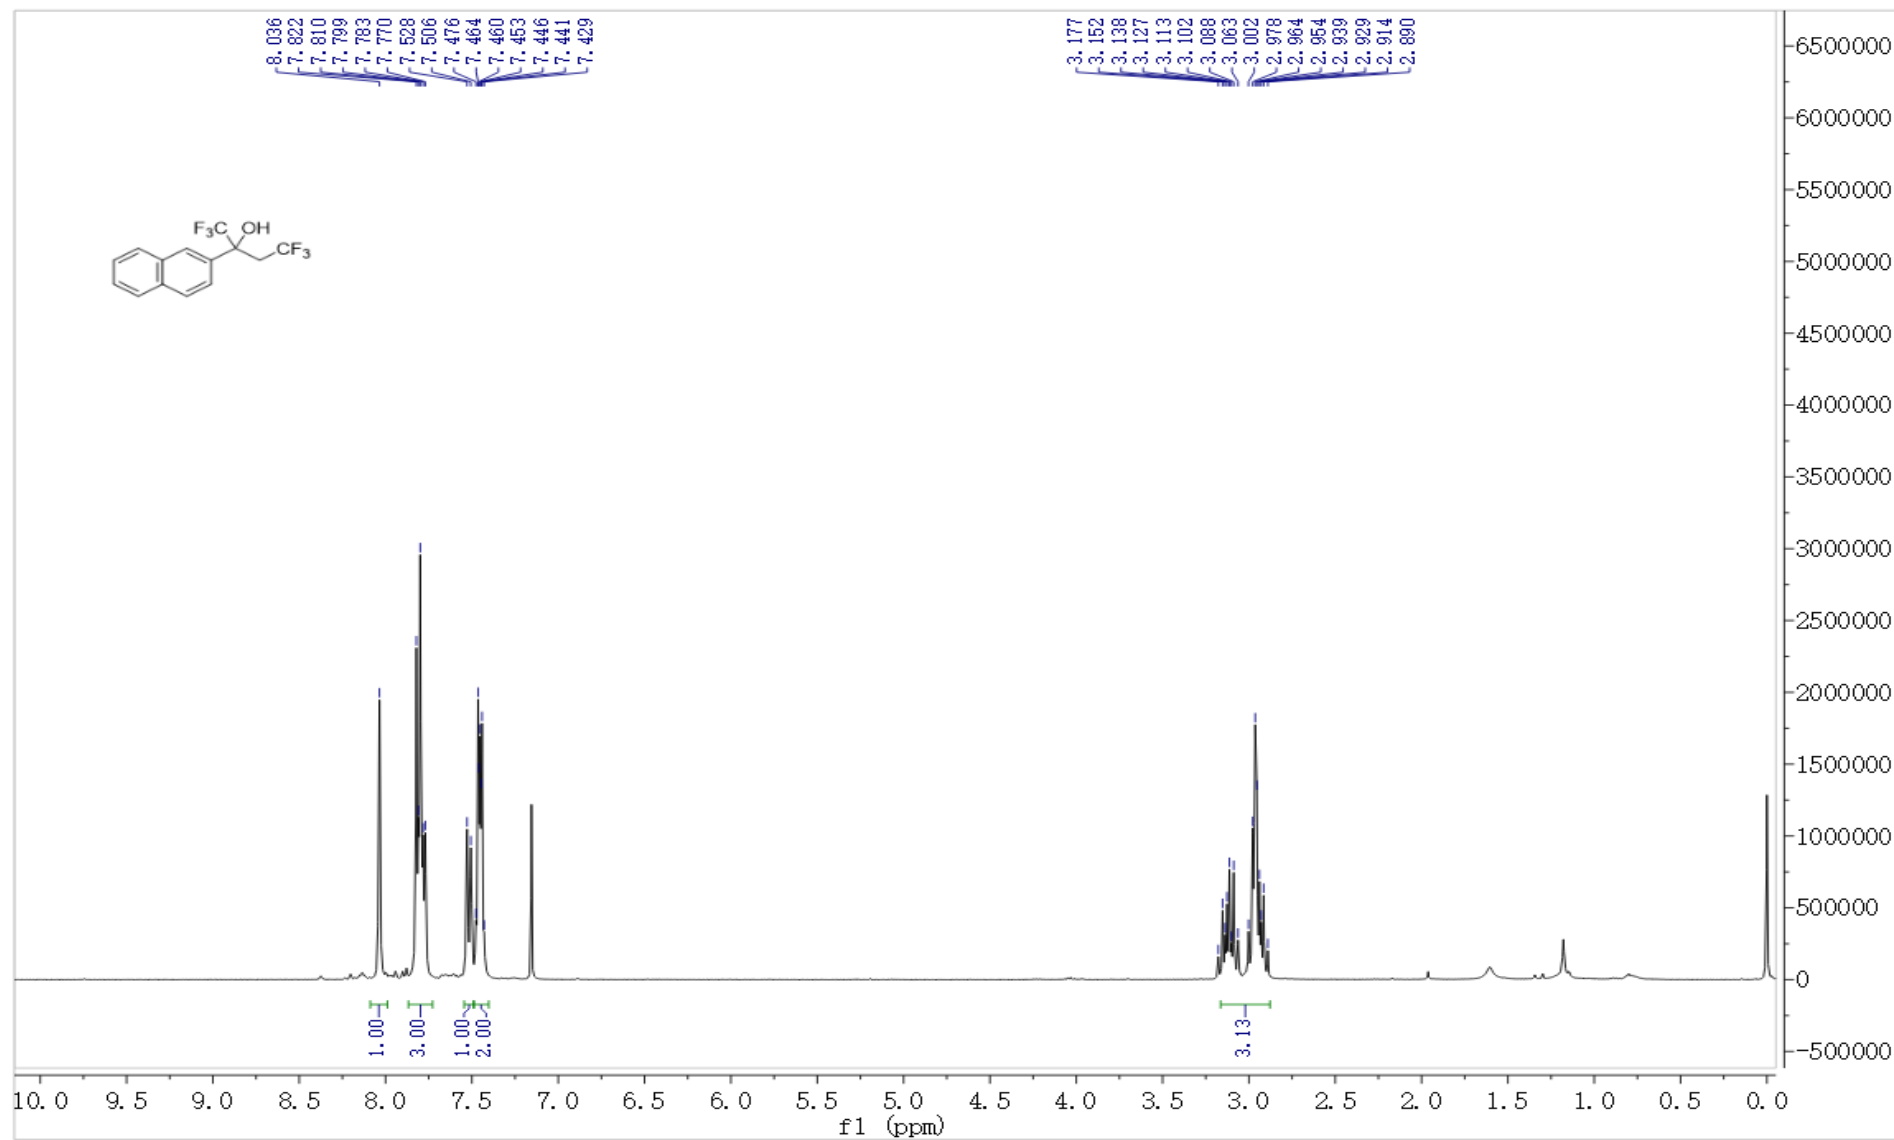

<sup>13</sup>C NMR spectrum of 2o

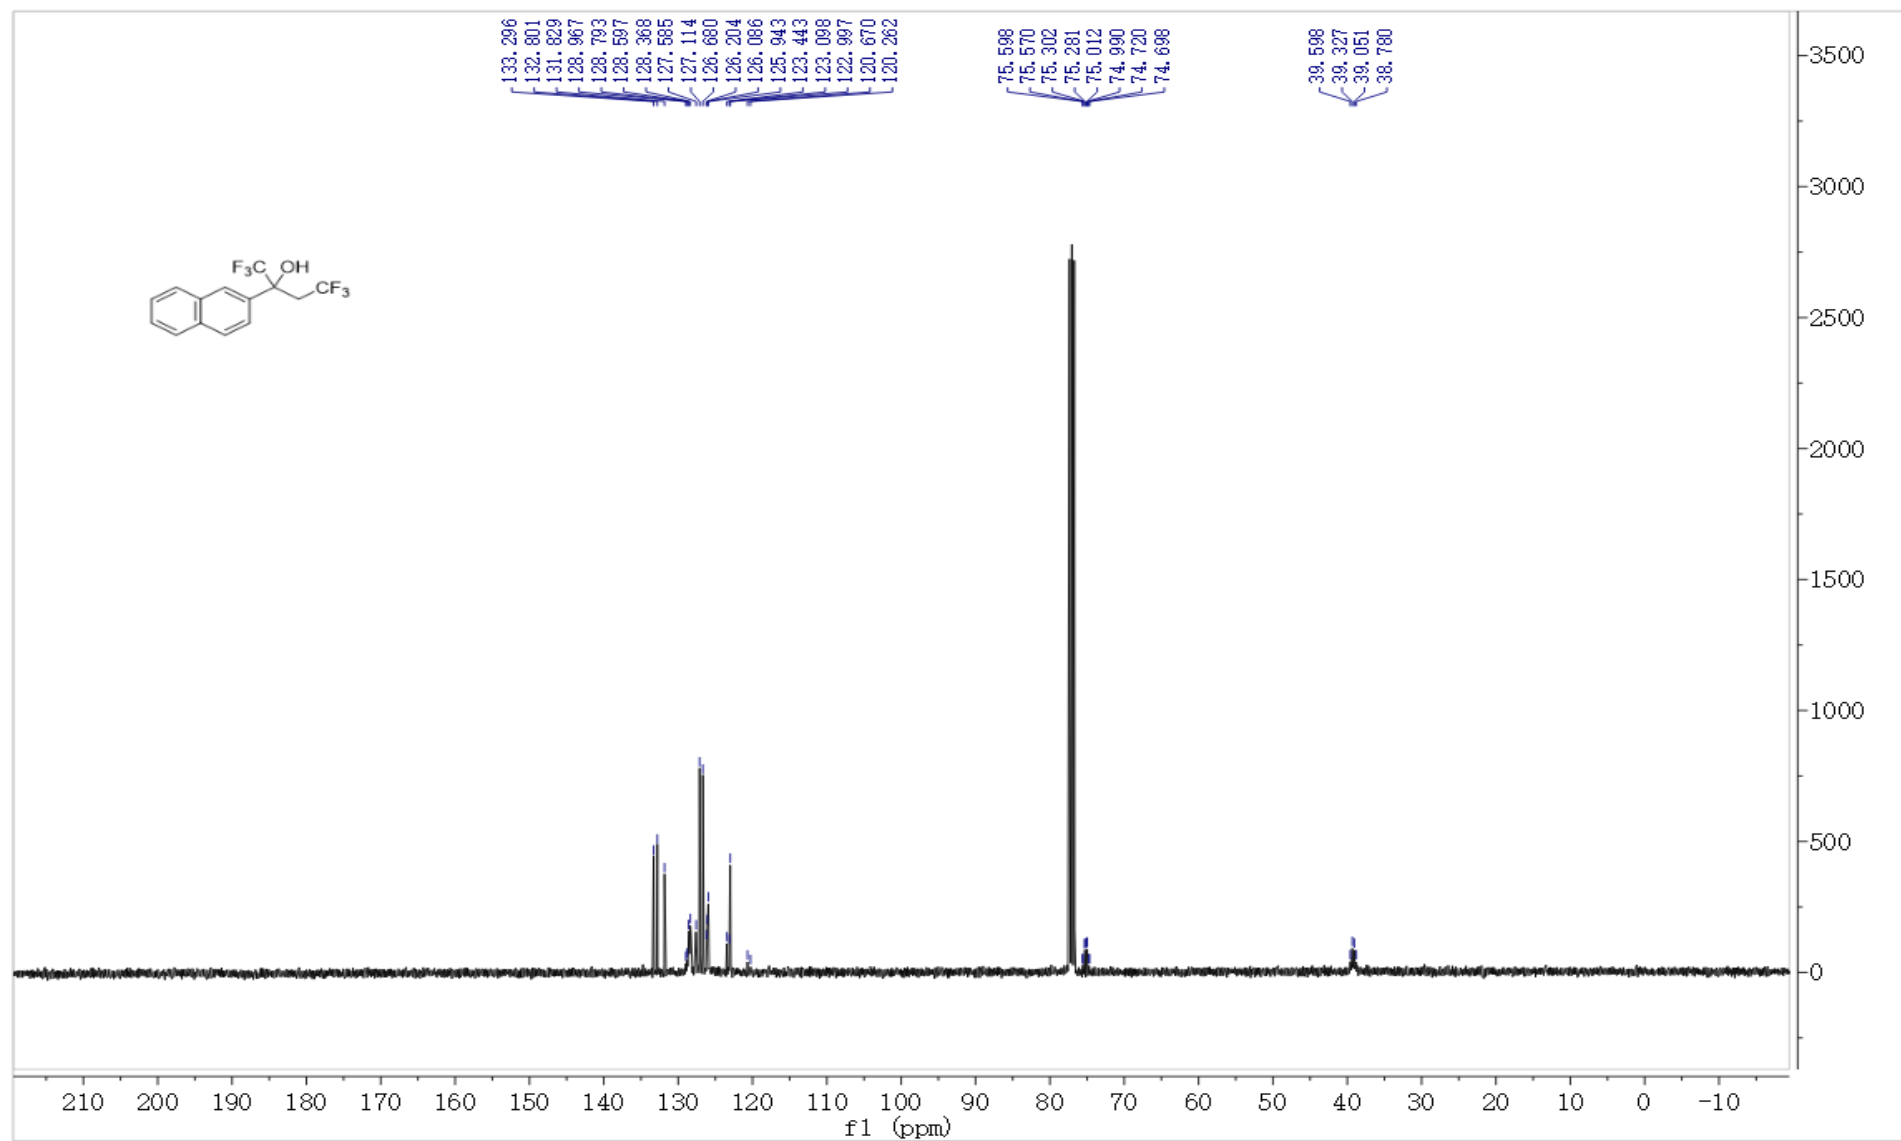

**<sup>19</sup>F NMR spectrum of 2o**

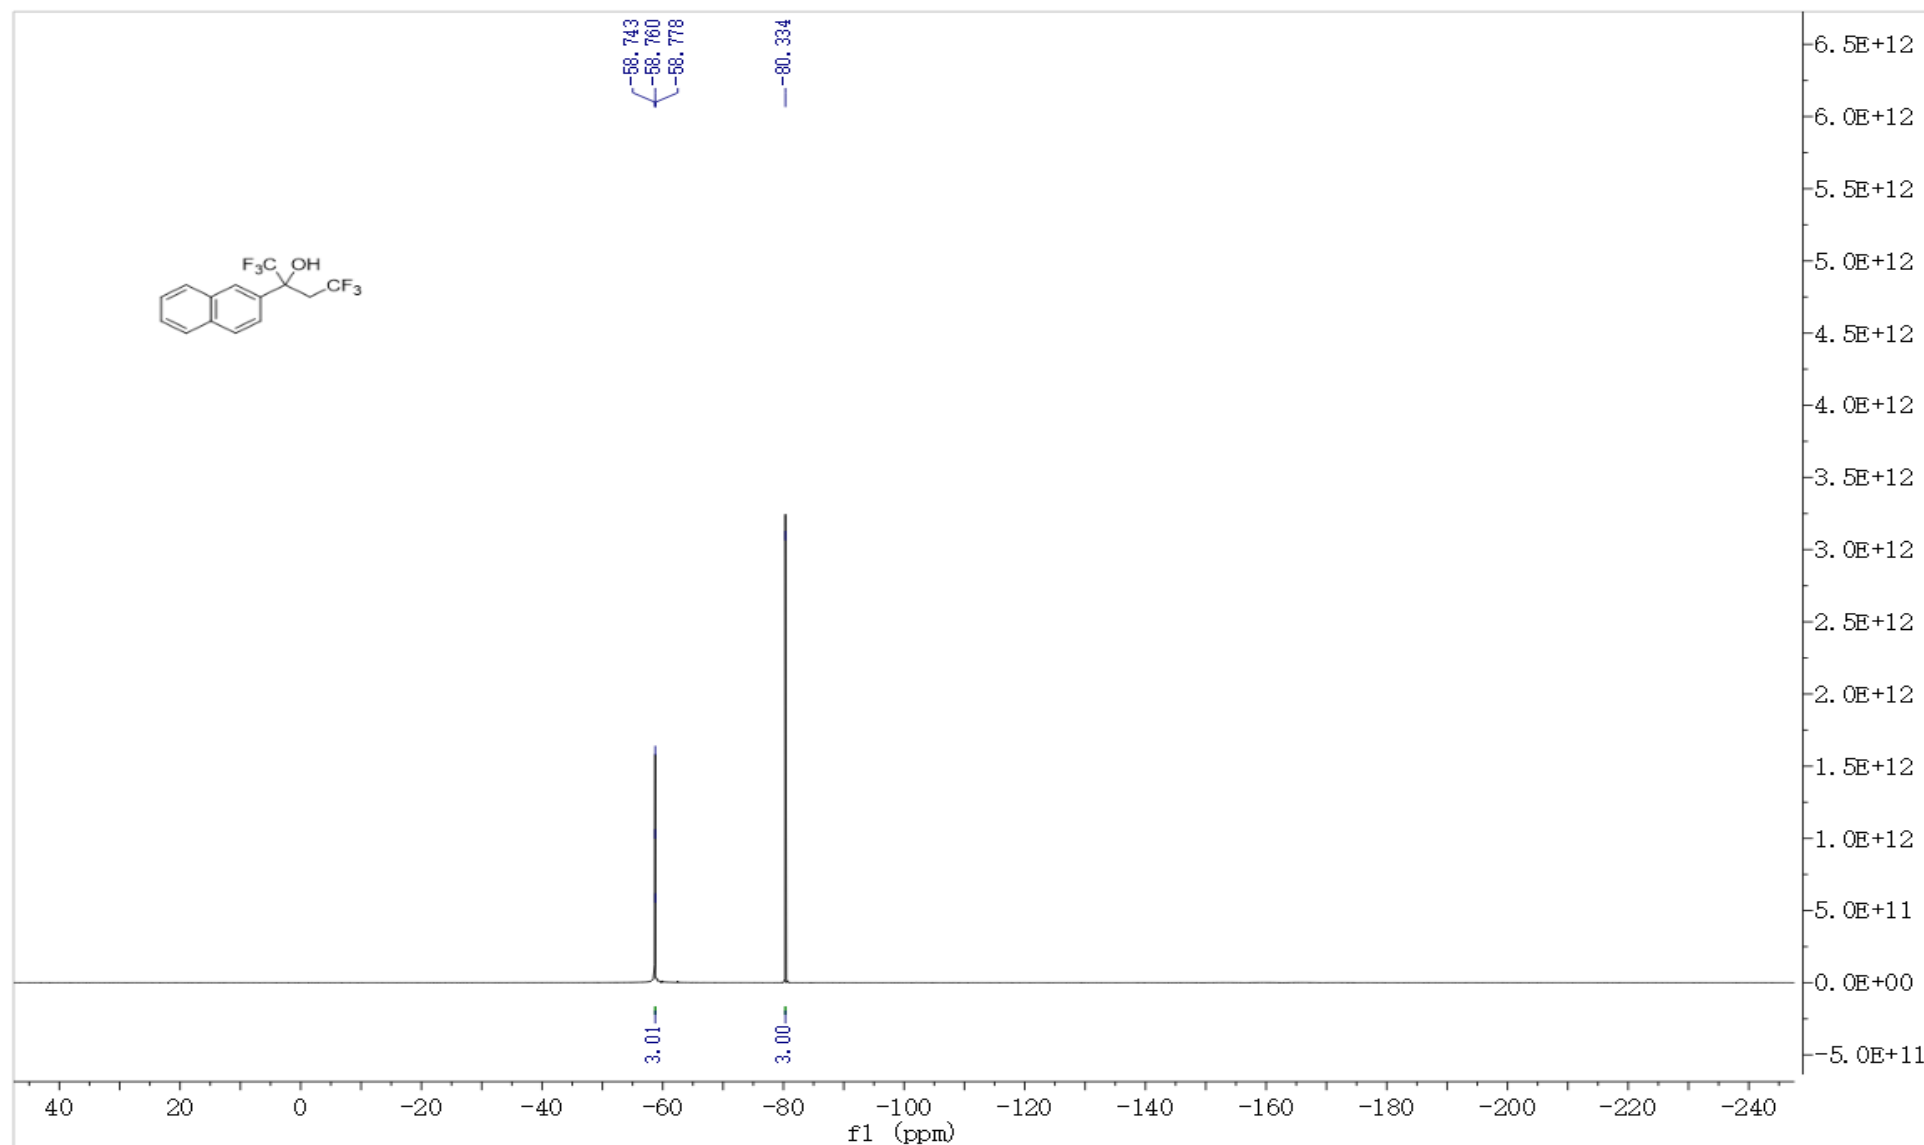

HRMS (EI) spectrum of 2o

CS-LC-M-308

Waters GCT Premier

20212807 61 (1.017) Cm (61-(23+29))

TOF MS EI+  
308.0639 1.94e4

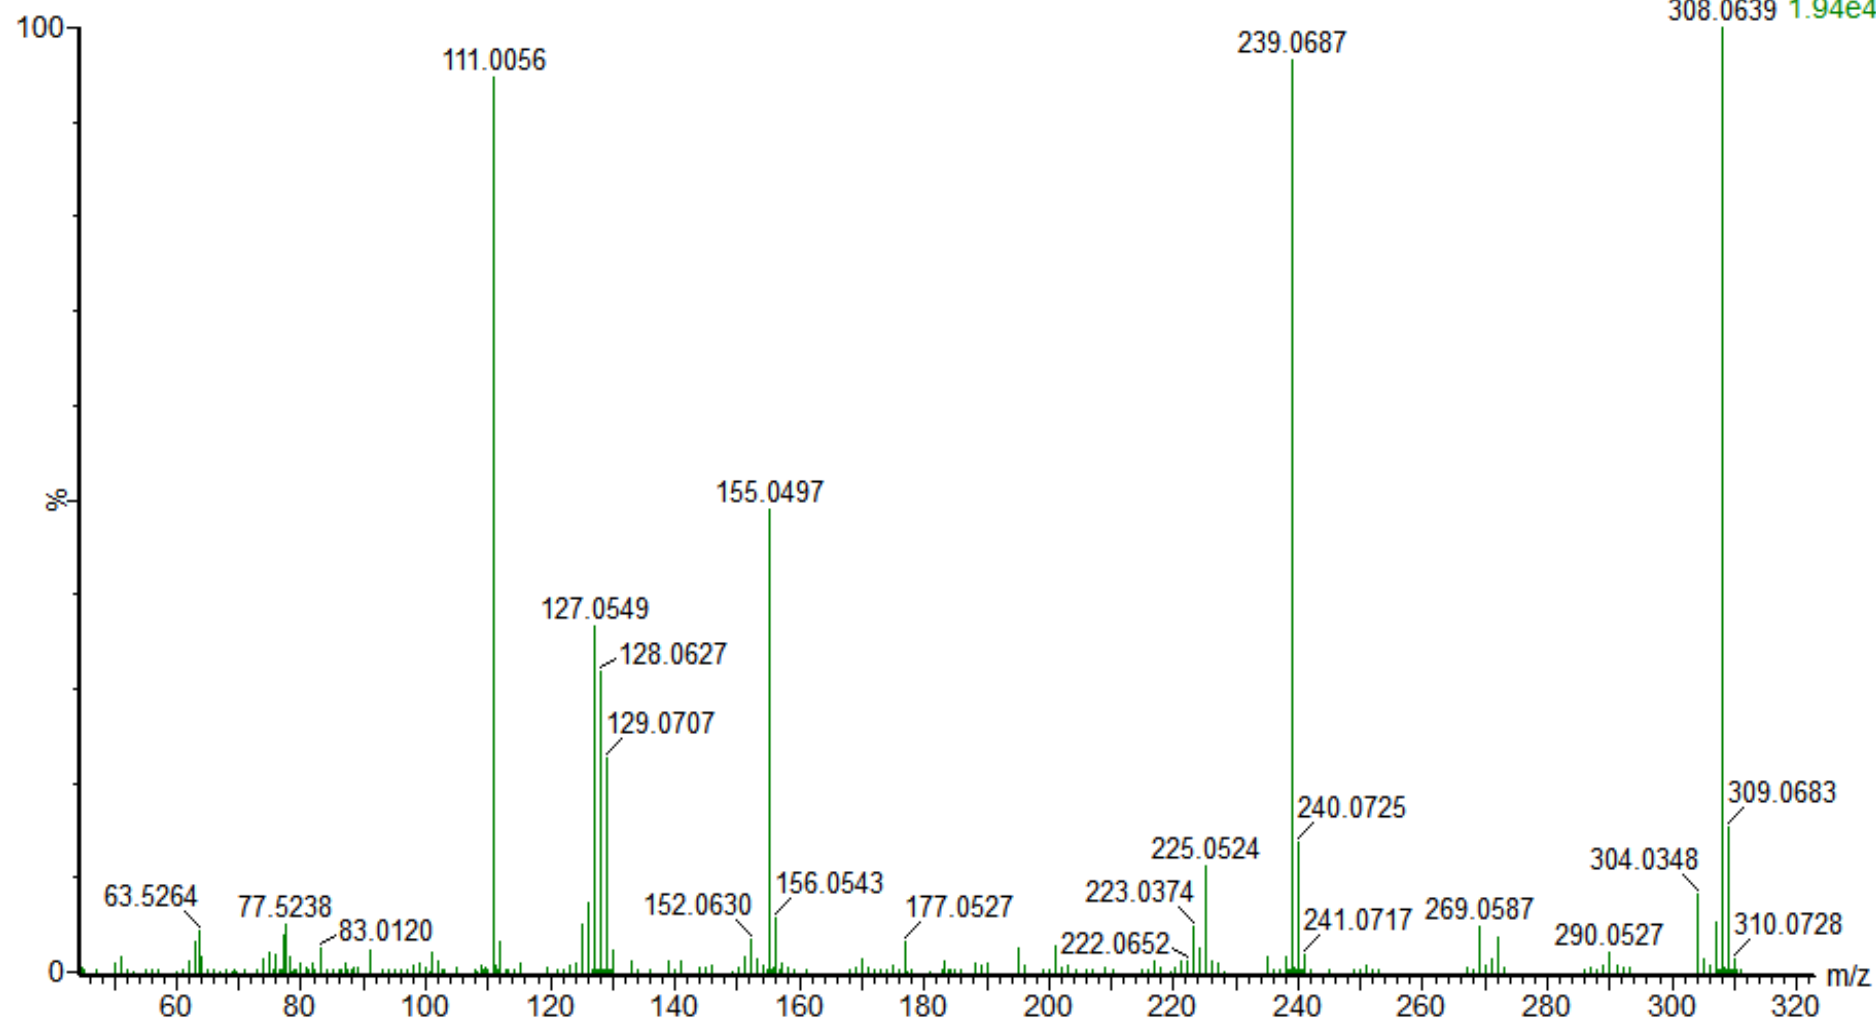

# <sup>1</sup>H NMR spectrum of 2p

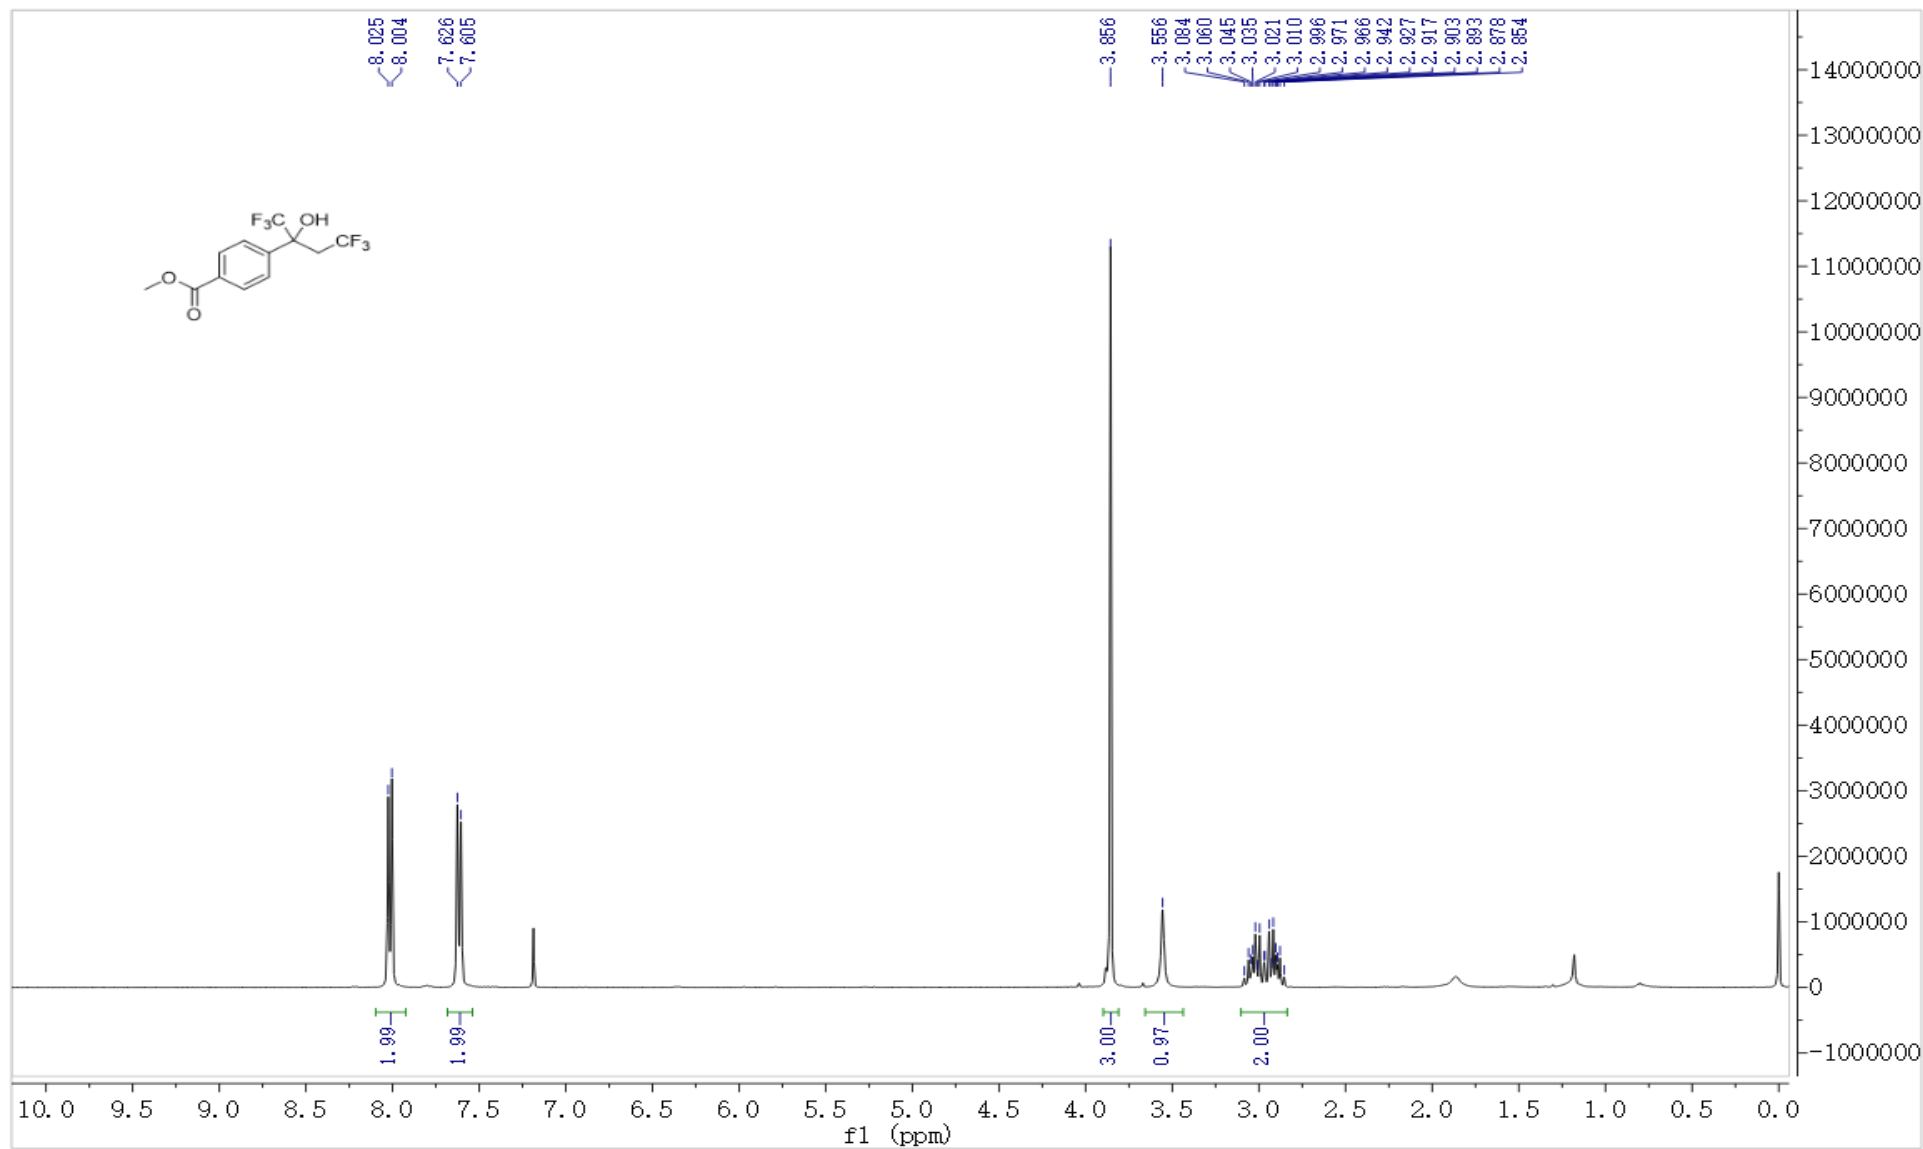

<sup>13</sup>C NMR spectrum of 2p

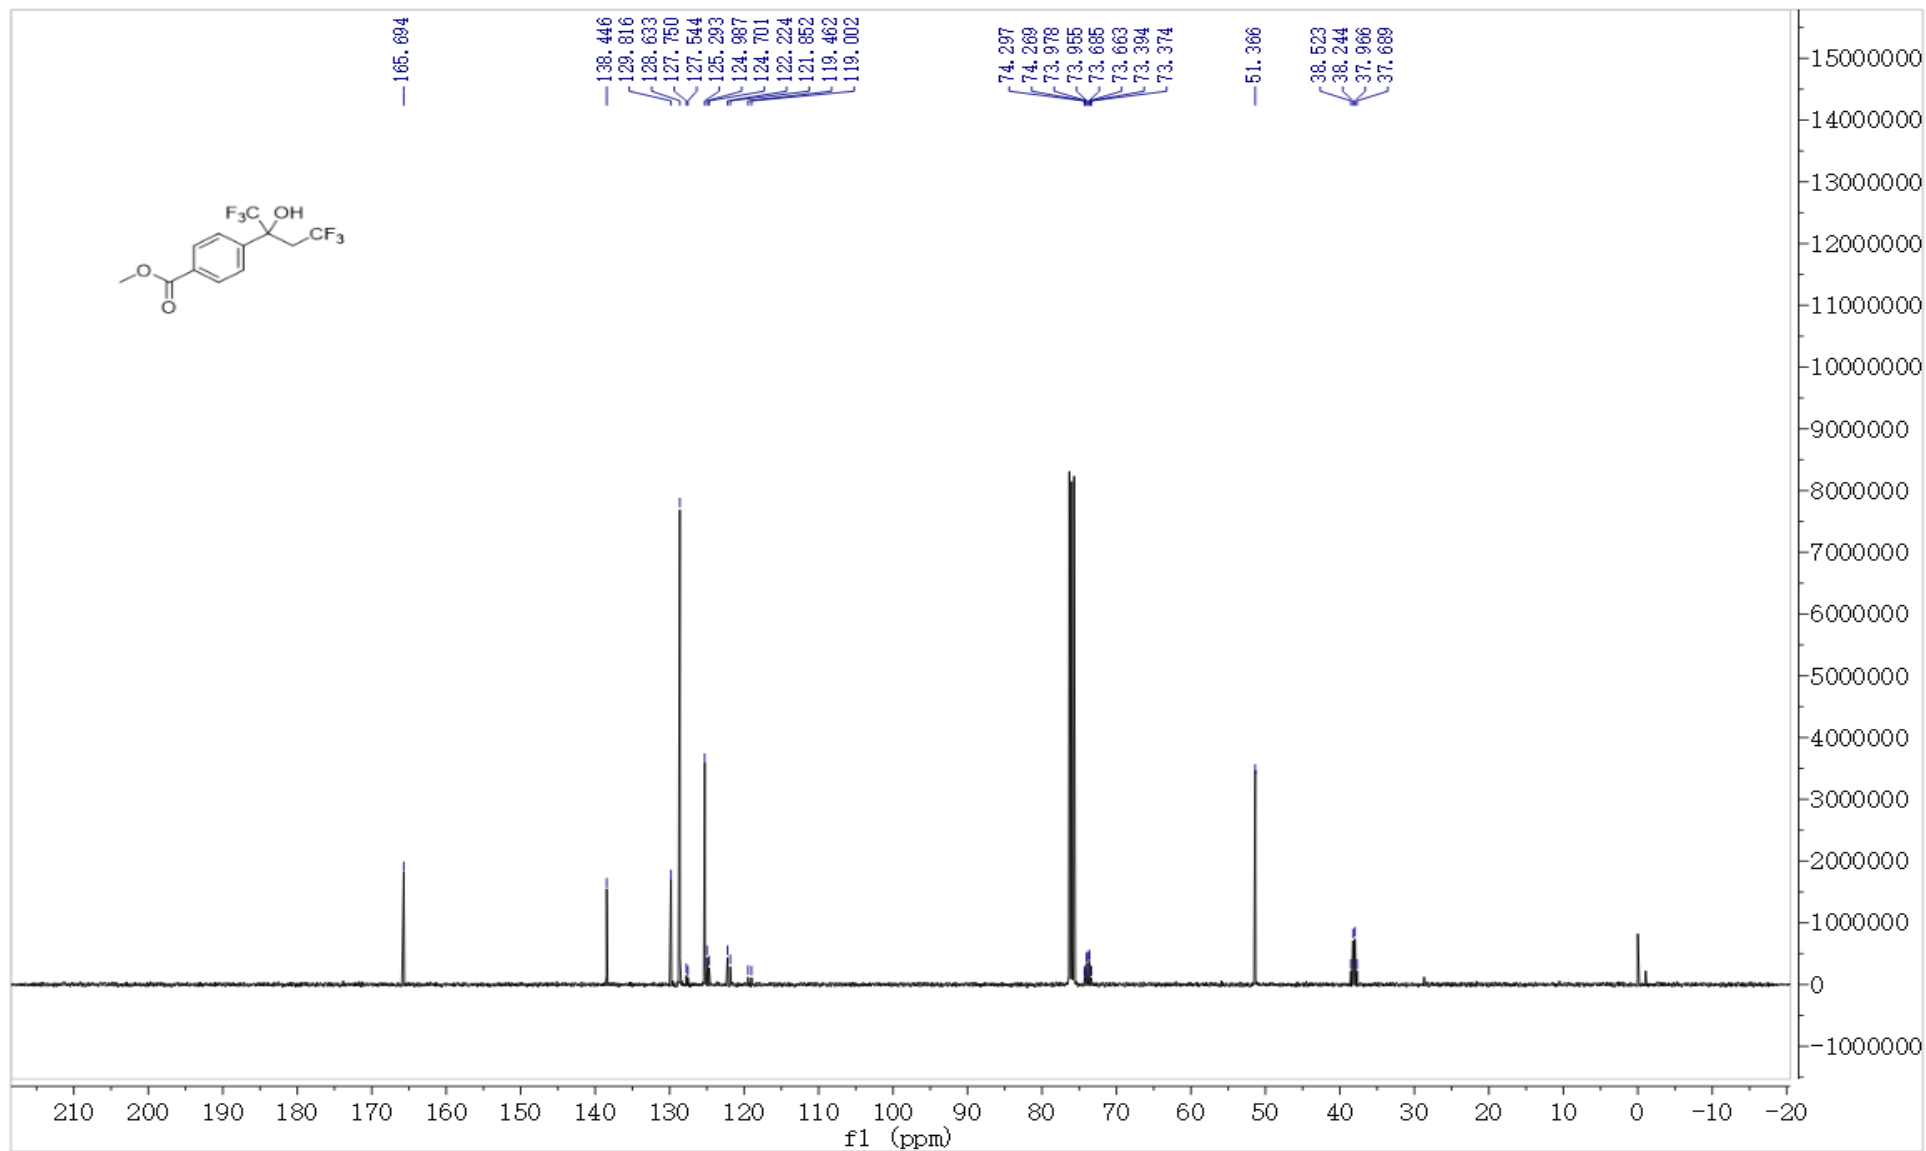



**<sup>19</sup>F NMR spectrum of 2p**

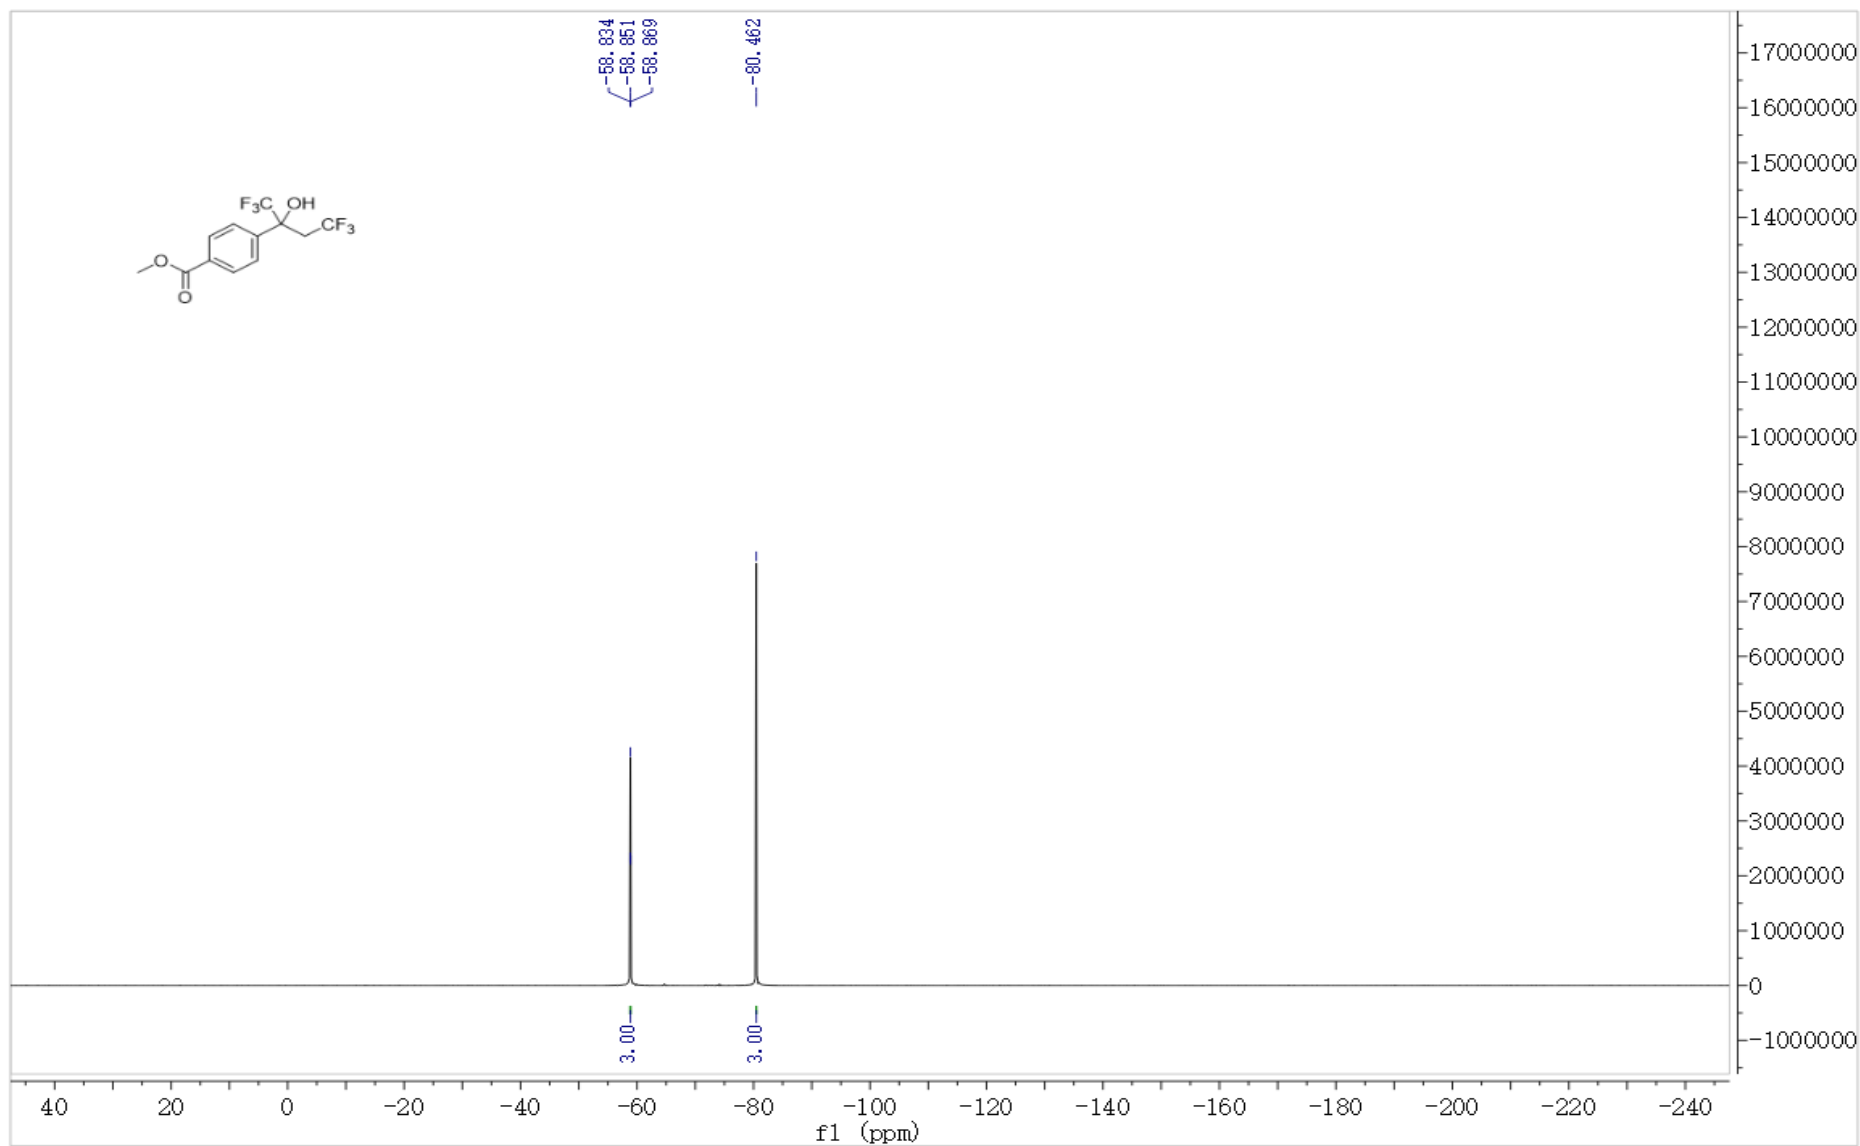

HRMS (EI) spectrum of 2p

CS-LC-P-316

20212803 199 (3.317) Cm (199-(99+319))

Waters GCT Premier

TOF MS EI+  
9.08e3

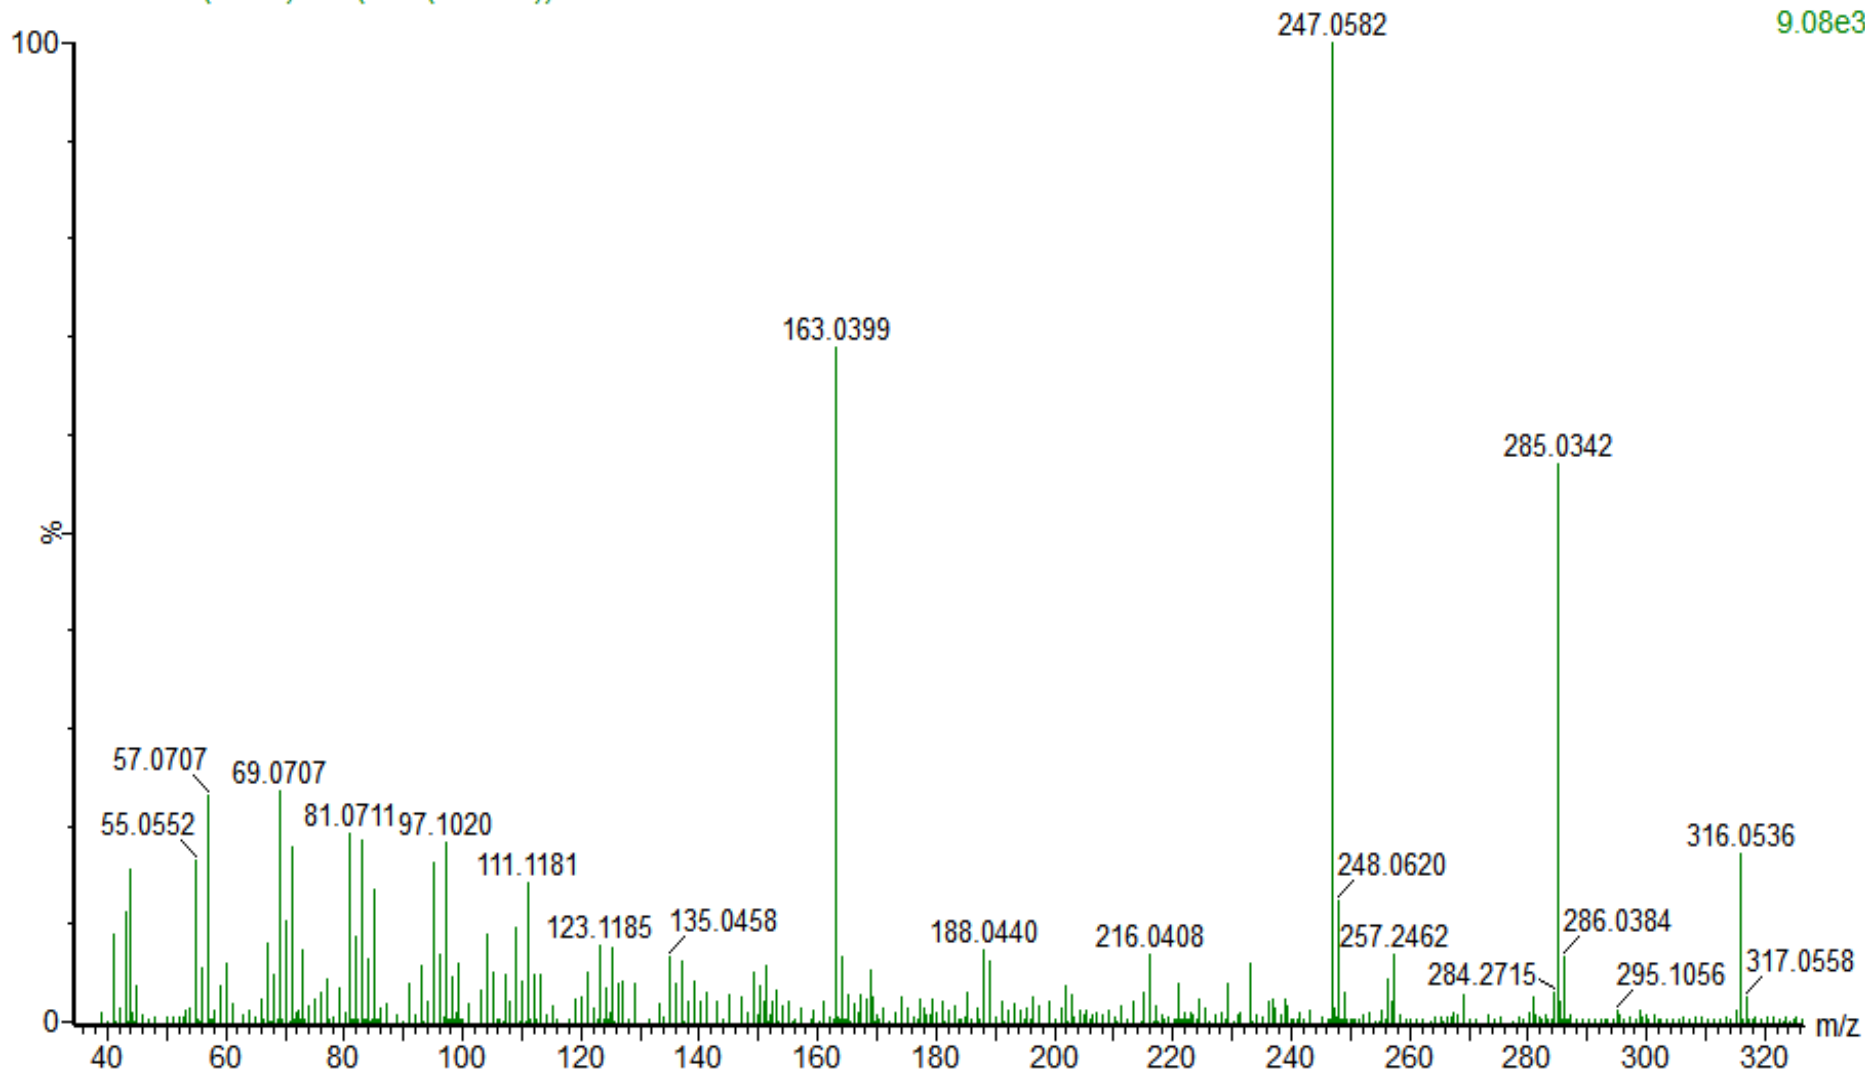

<sup>1</sup>H NMR spectrum of 2q

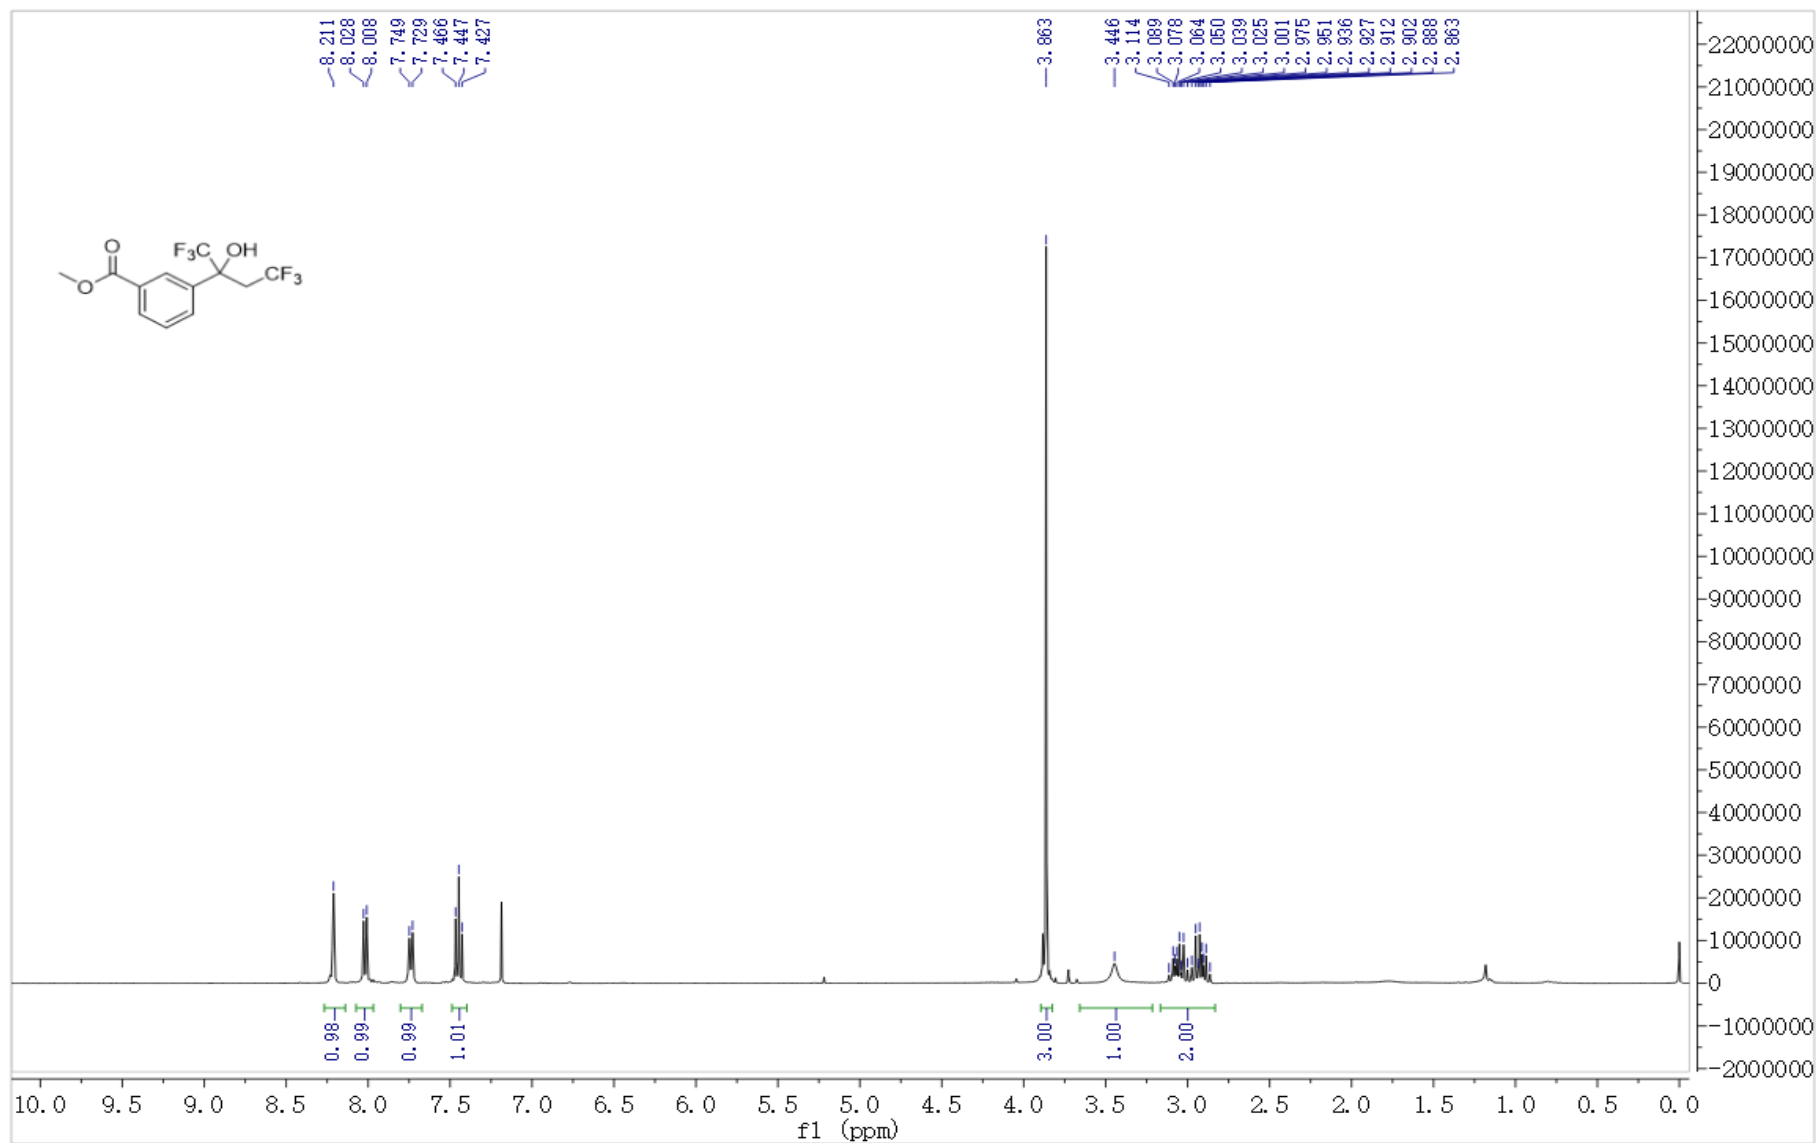

<sup>13</sup>C NMR spectrum of 2q

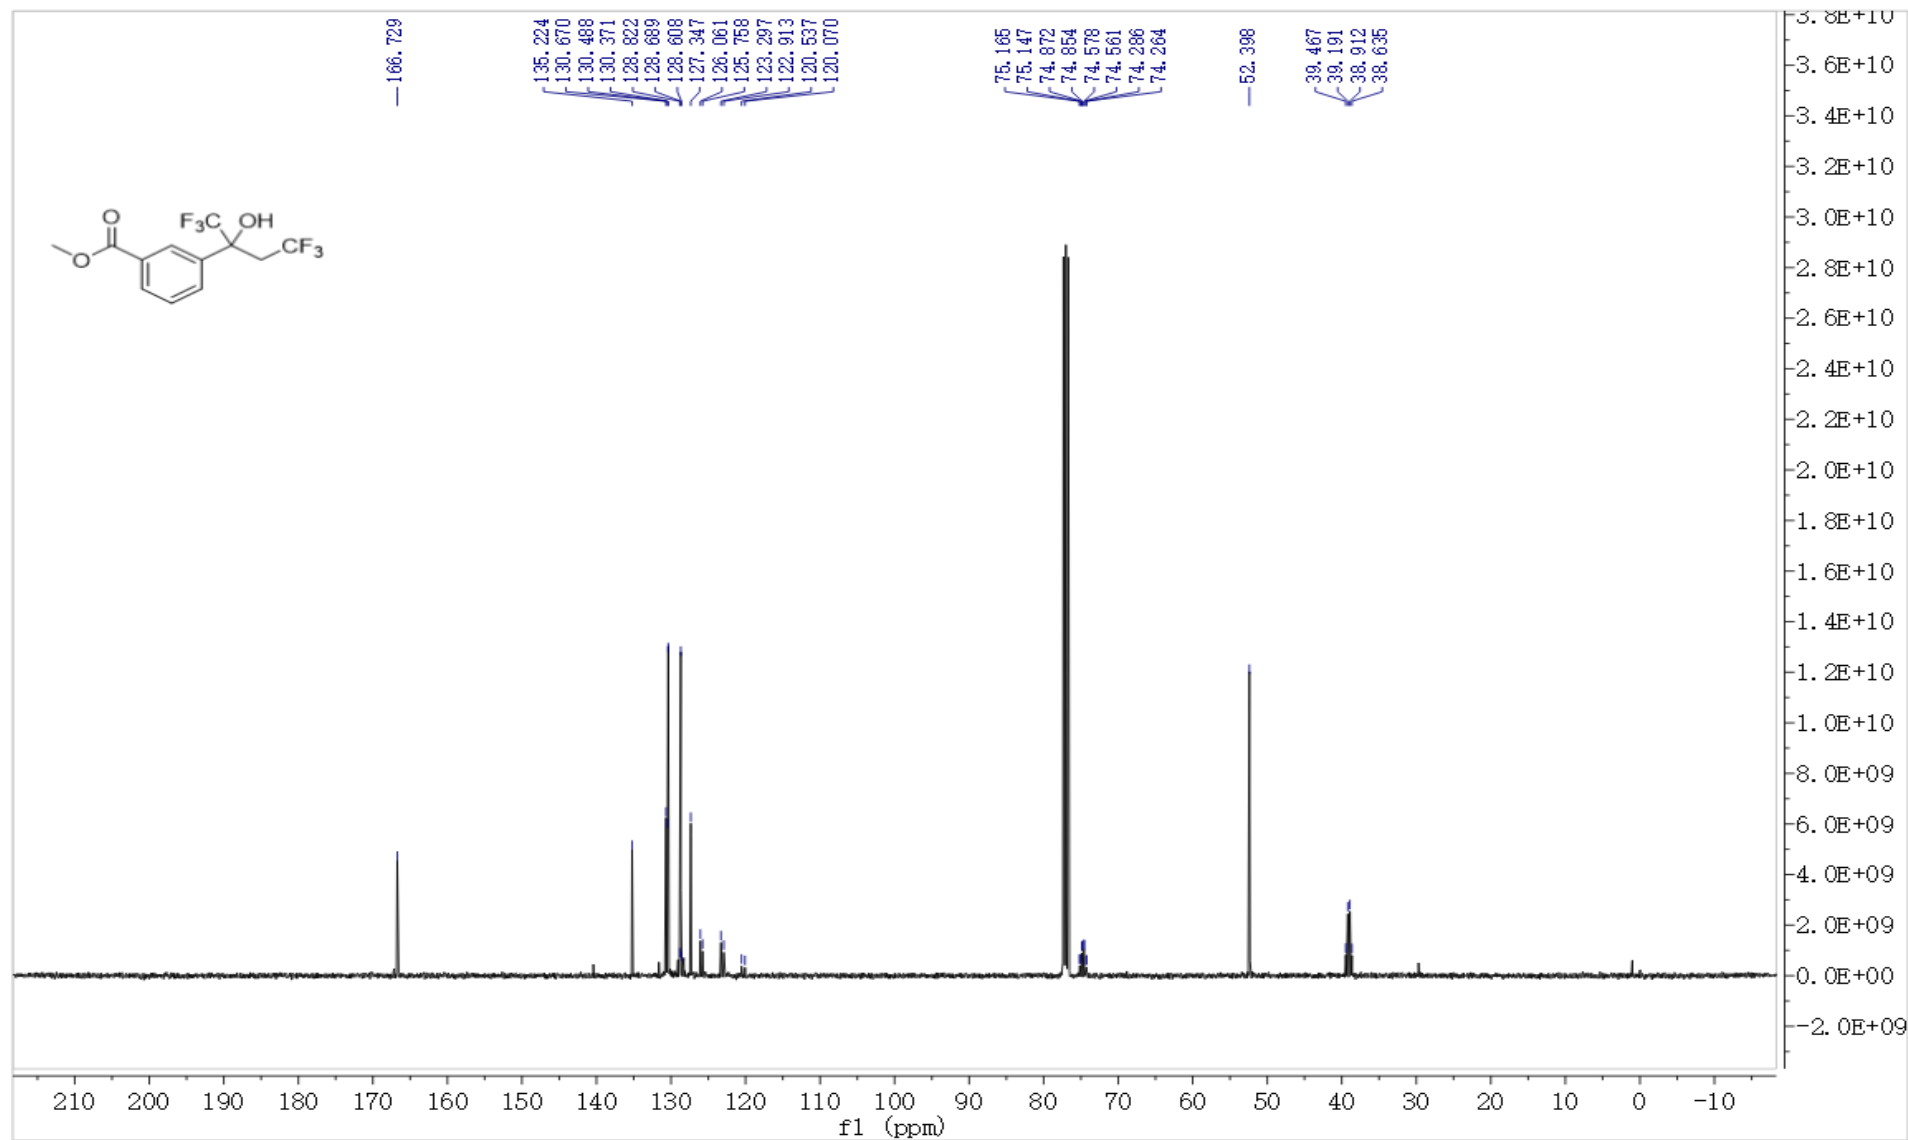

**<sup>19</sup>F NMR spectrum of 2q**

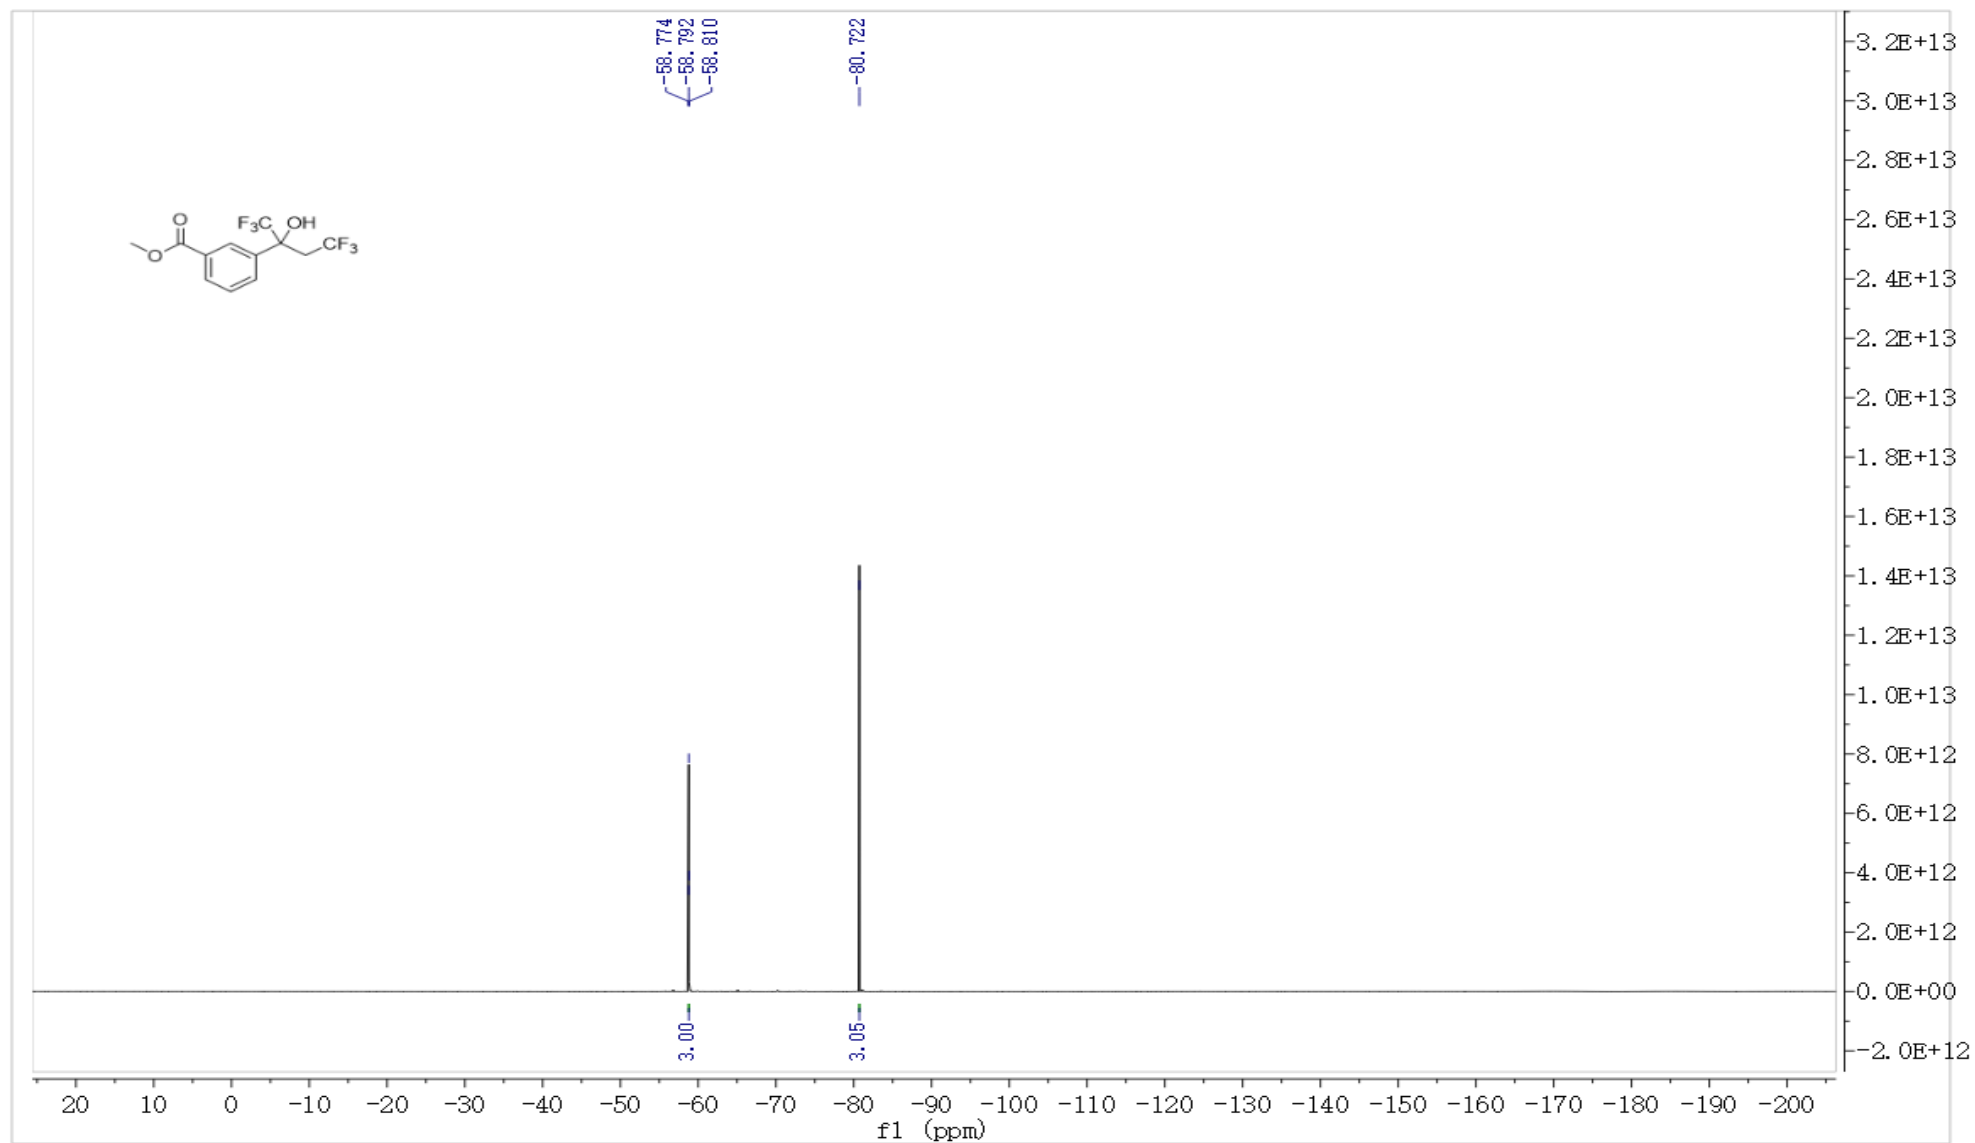

HRMS (EI) spectrum of 2q

CS-LC-M-316

20212804 101 (1.683) Cm (101-(21+58))

Waters GCT Premier

TOF MS EI+  
2.00e4

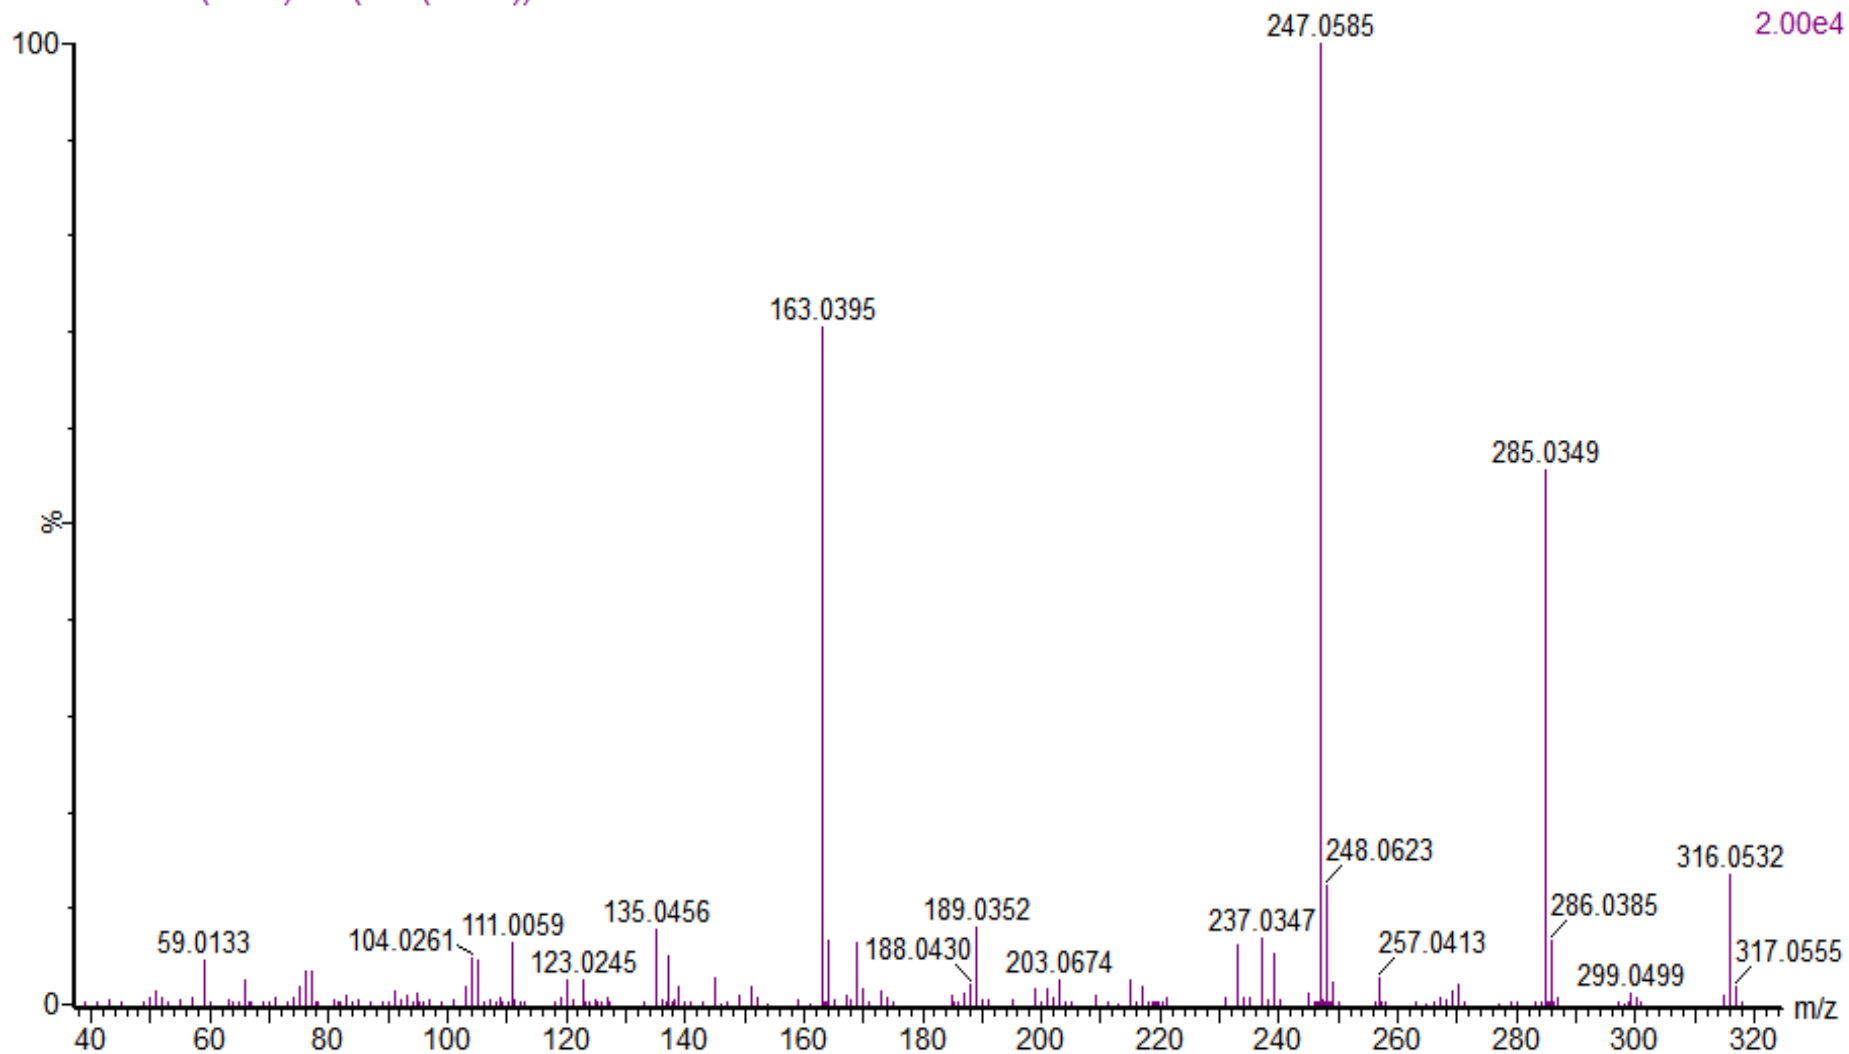

<sup>1</sup>H NMR spectrum of 2r

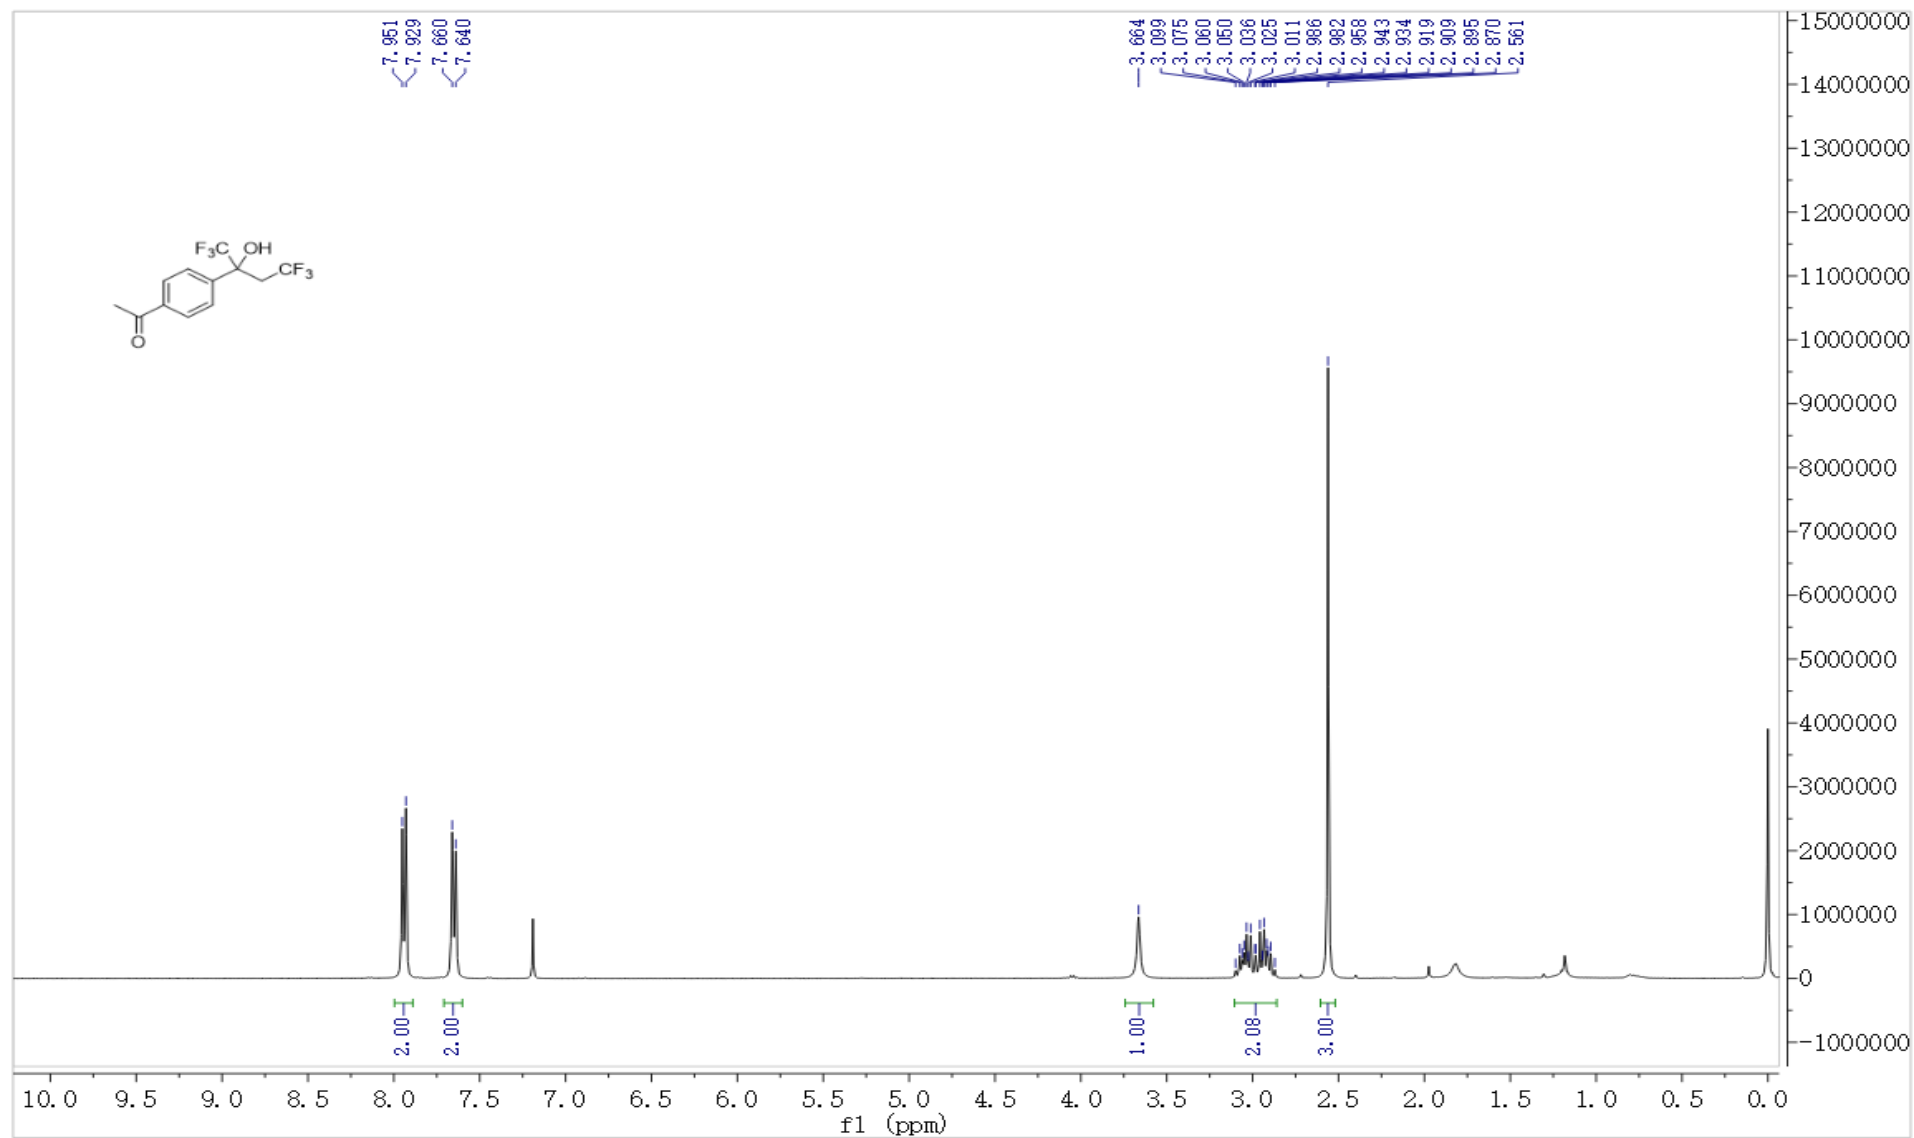

<sup>13</sup>C NMR spectrum of 2r

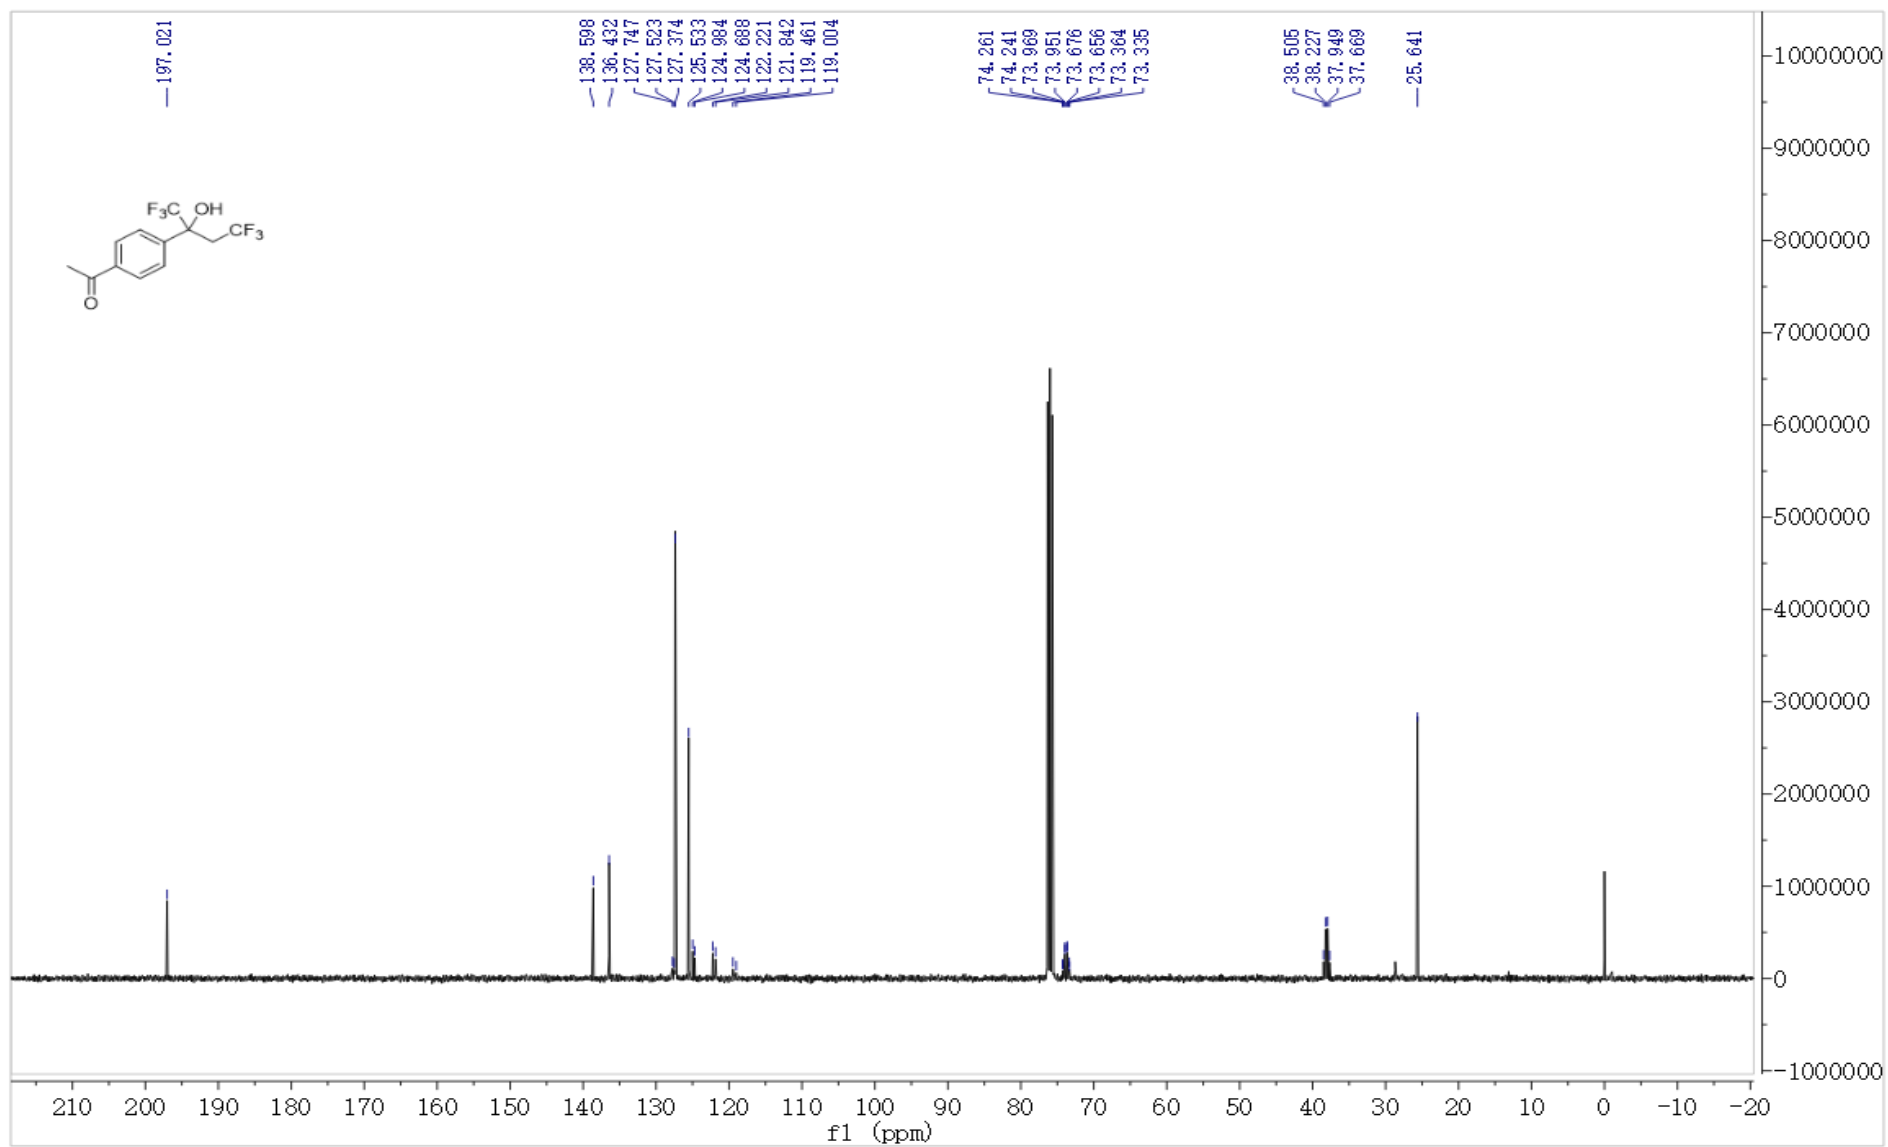



**<sup>19</sup>F NMR spectrum of 2r**

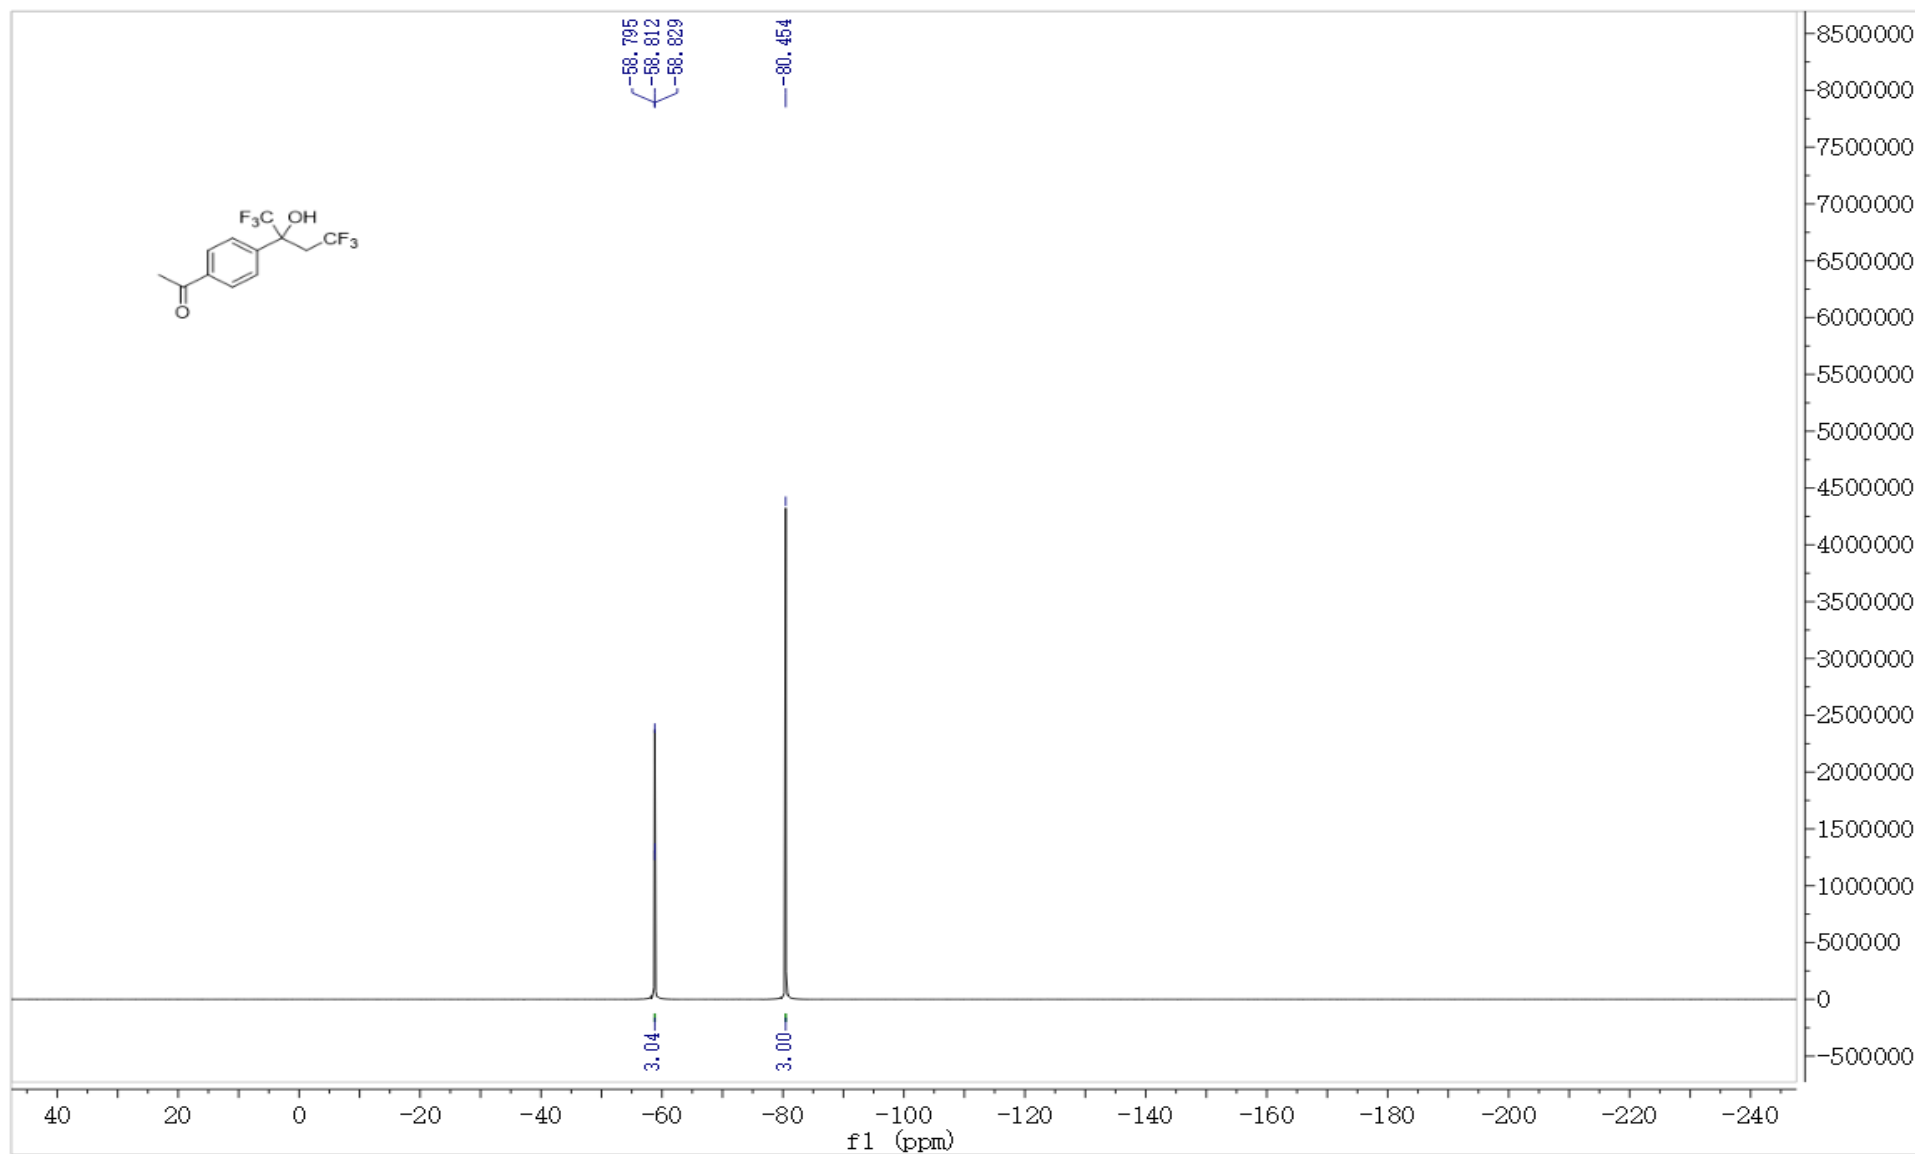

HRMS (EI) spectrum of 2r

CS-LC-P-300

20212802 303 (5.050) Cm (303-(41+44))

Waters GCT Premier

TOF MS EI+  
2.02e4

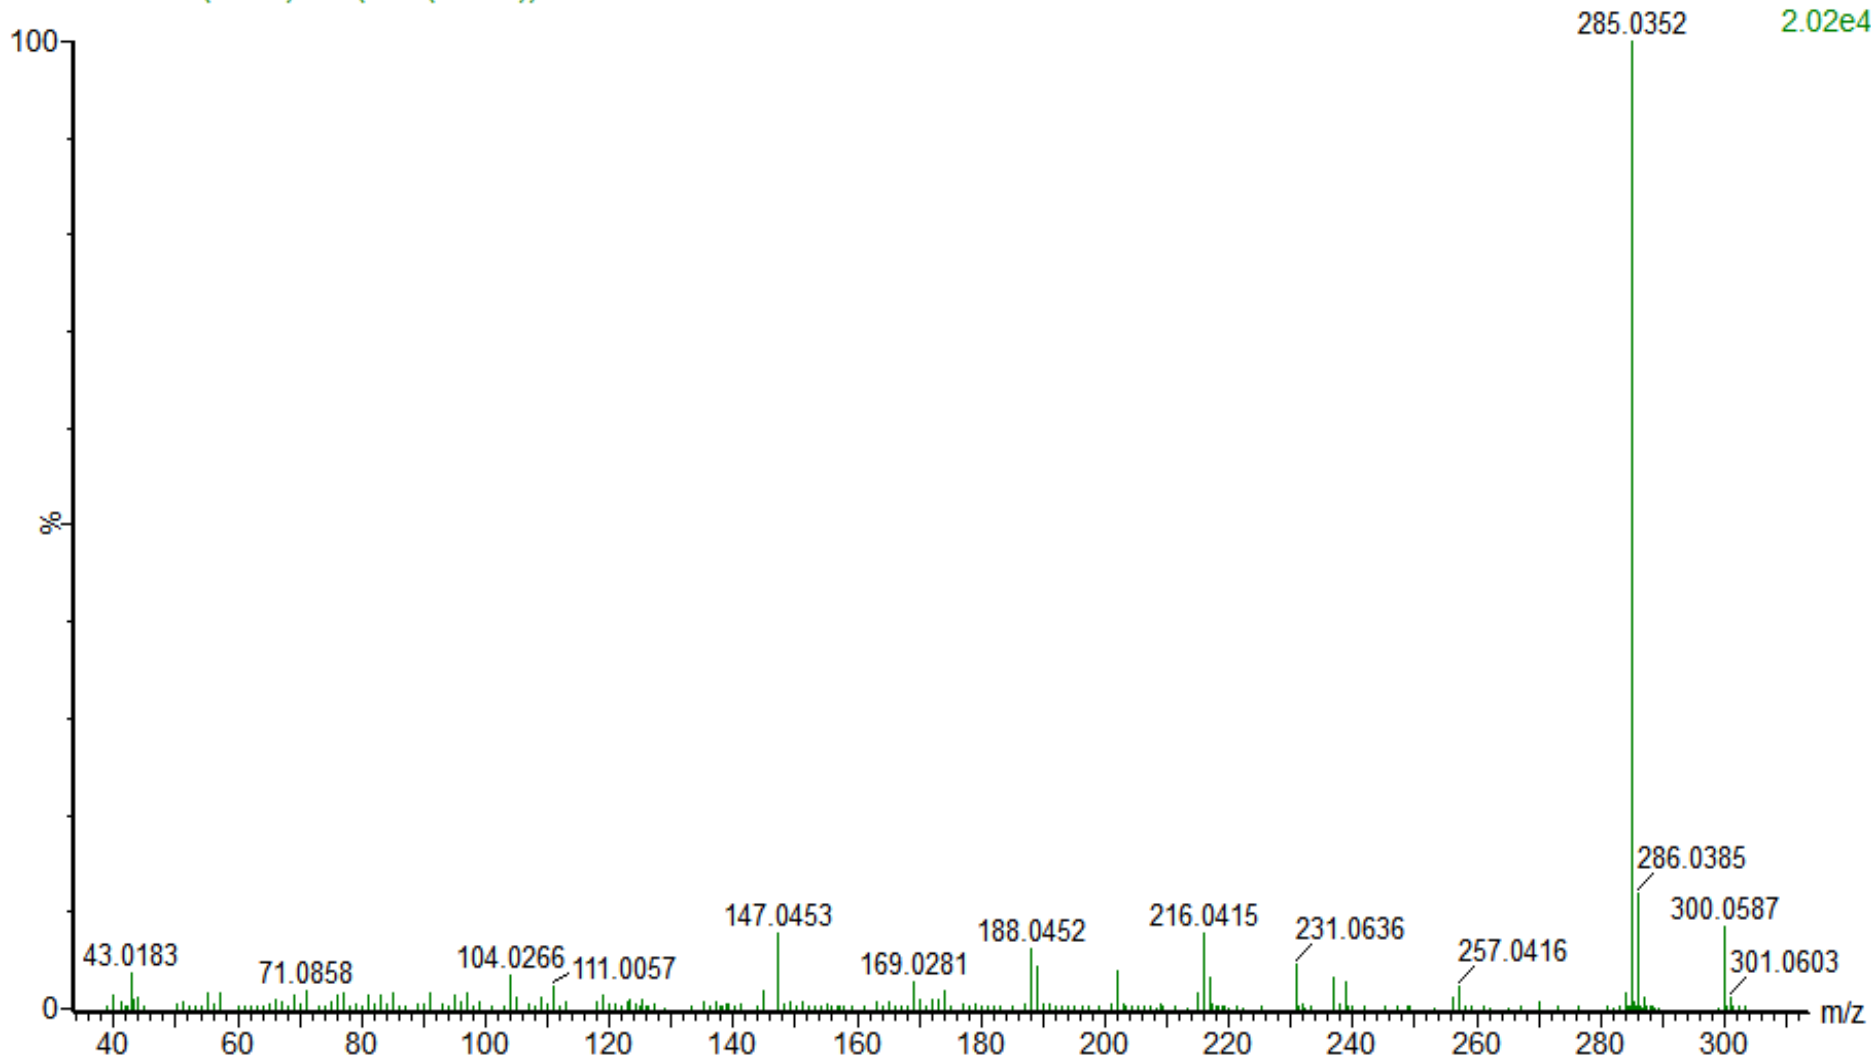

# <sup>1</sup>H NMR spectrum of 2s

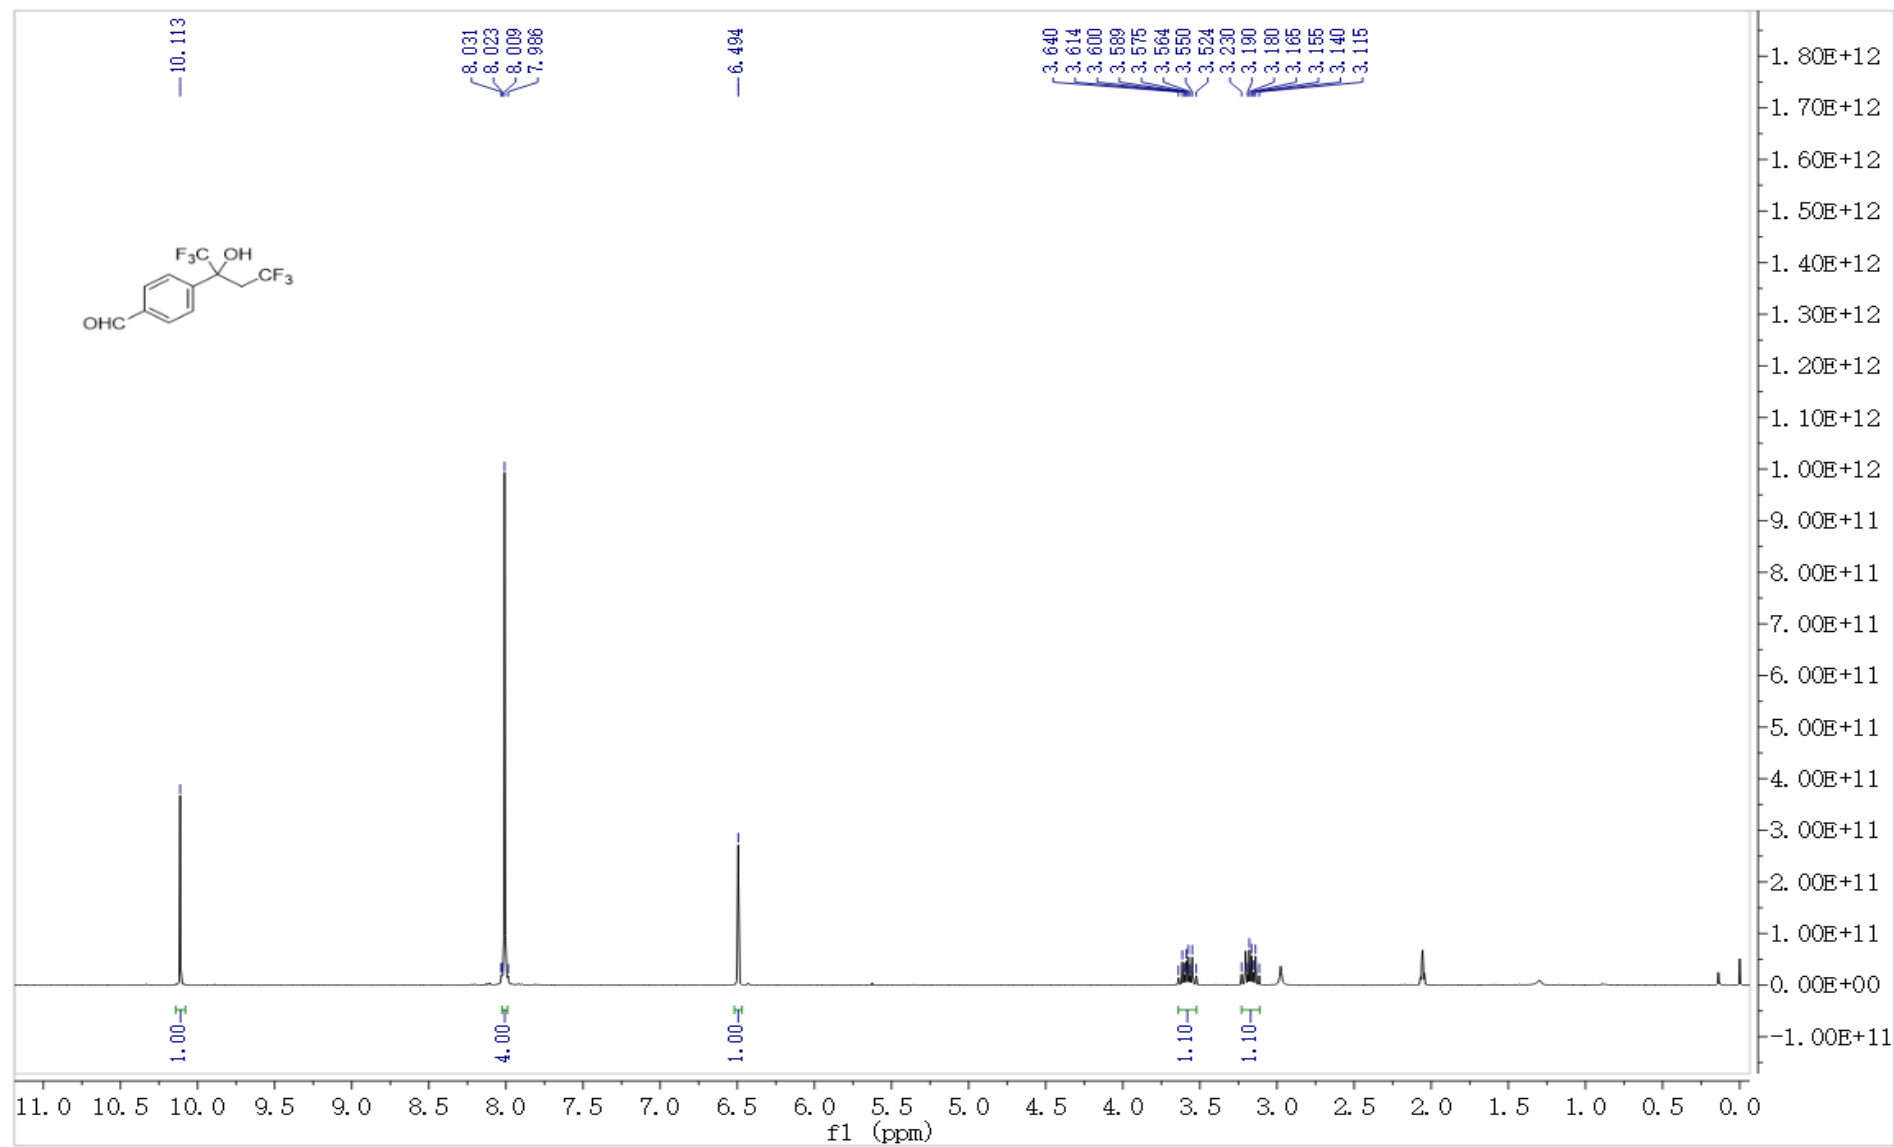

<sup>13</sup>C NMR spectrum of 2s

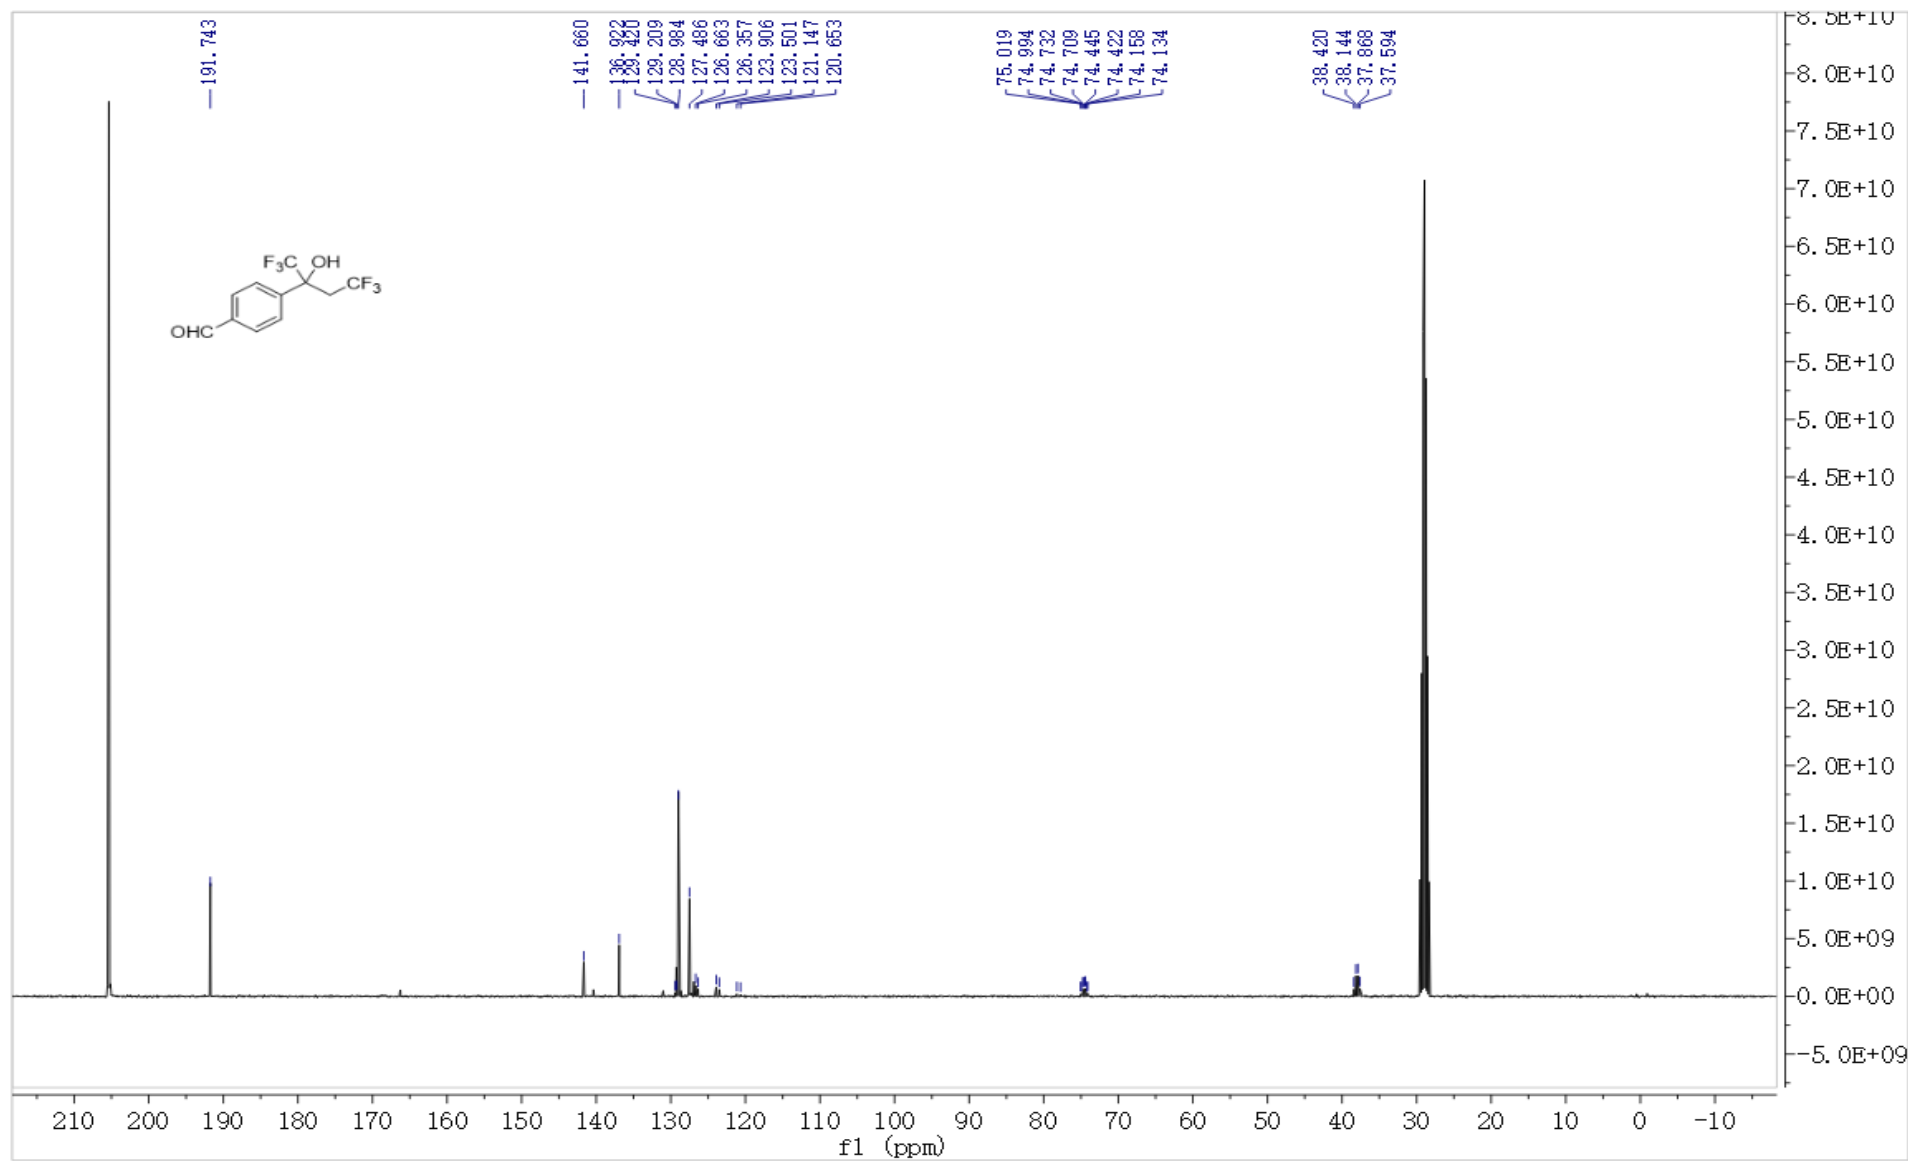

**<sup>19</sup>F NMR spectrum of 2s**

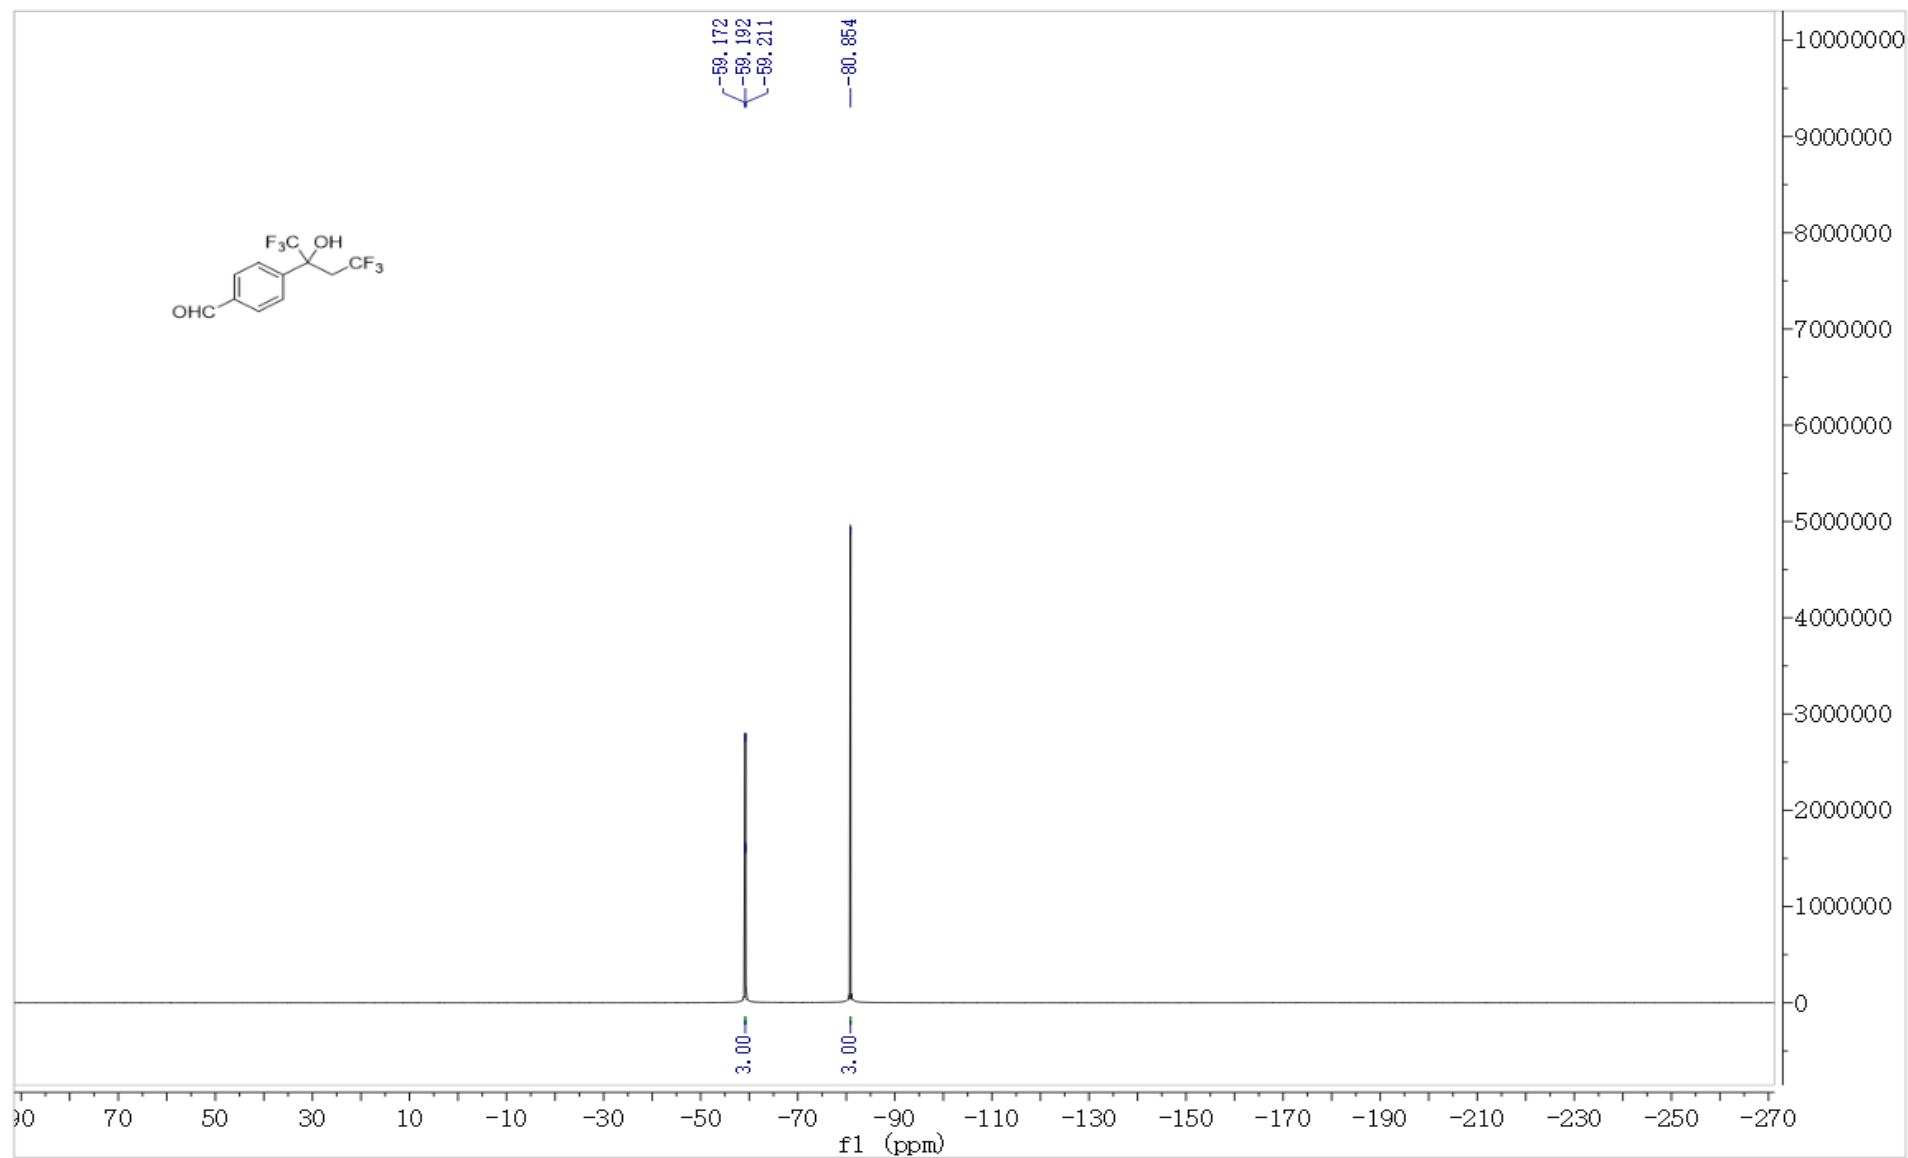

HRMS (EI) spectrum of 2s

CS-LC-P-286

Waters GCT Premier

20220481 738 (12.304) Cm (738-(1571+275))

TOF MS EI+  
1.49e4

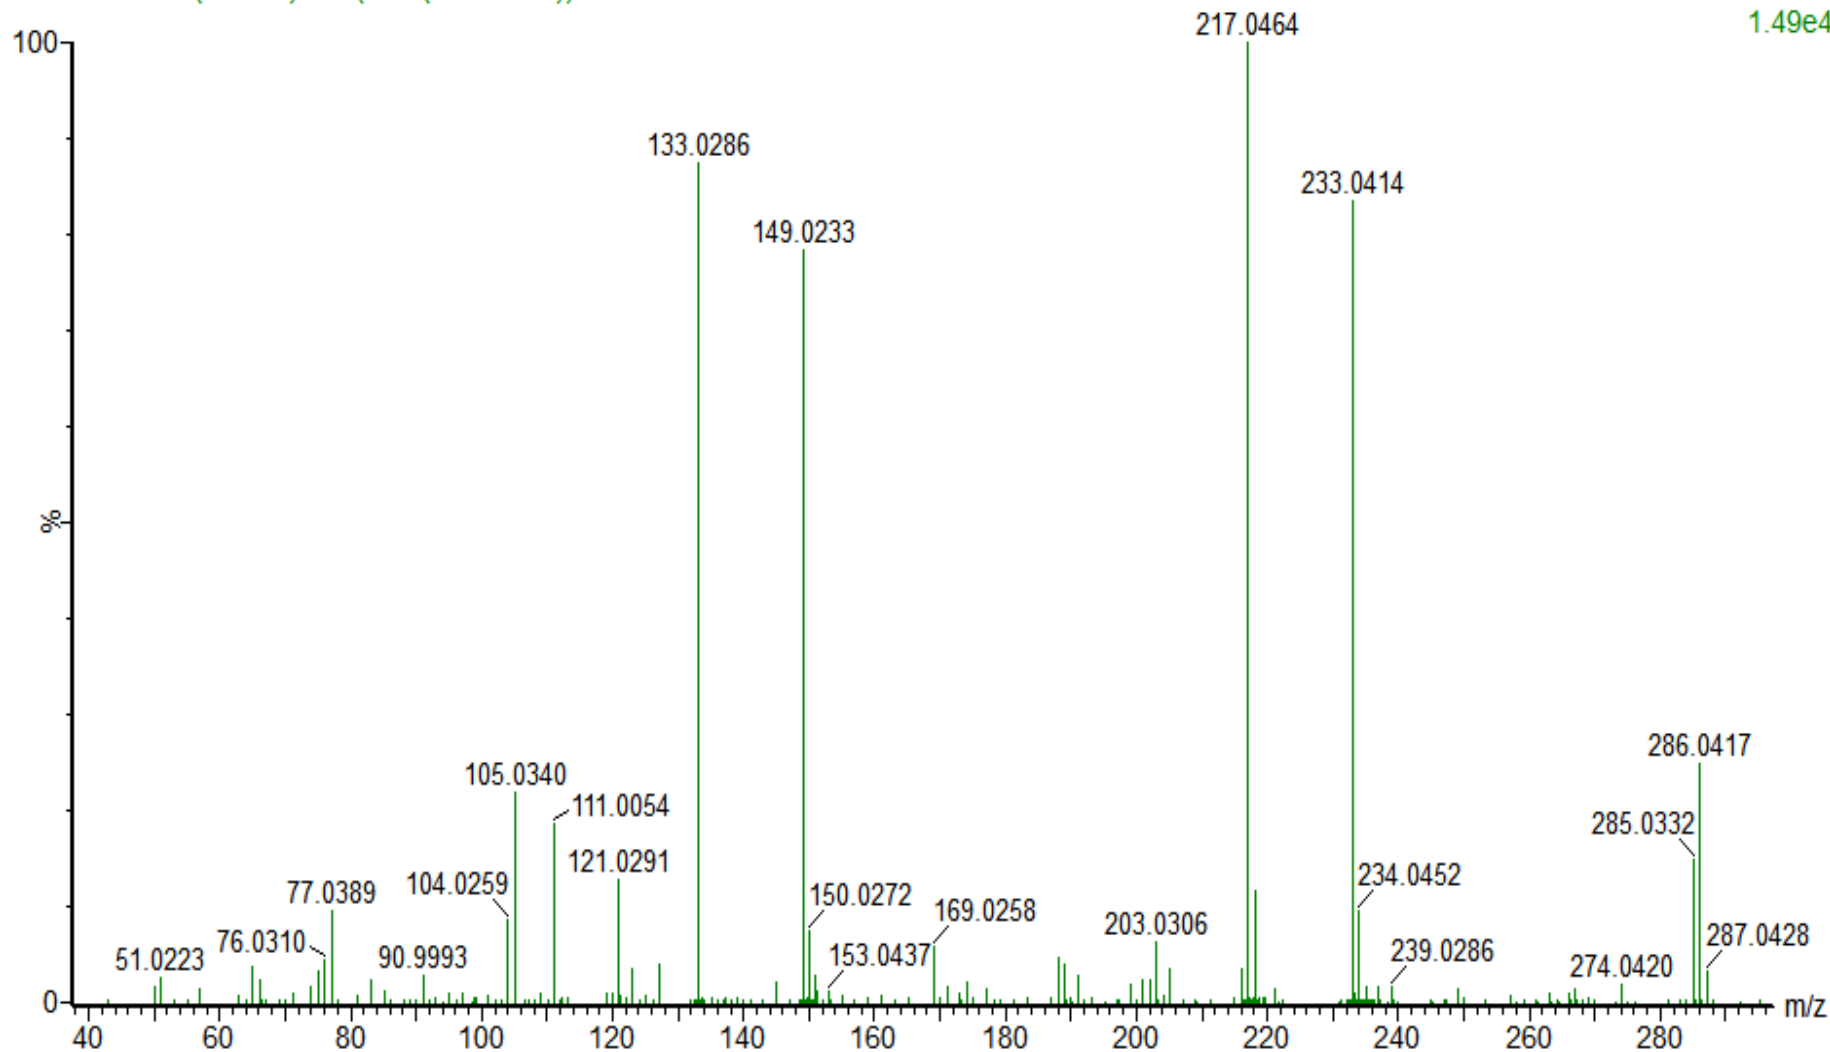

# <sup>1</sup>H NMR spectrum of 2t

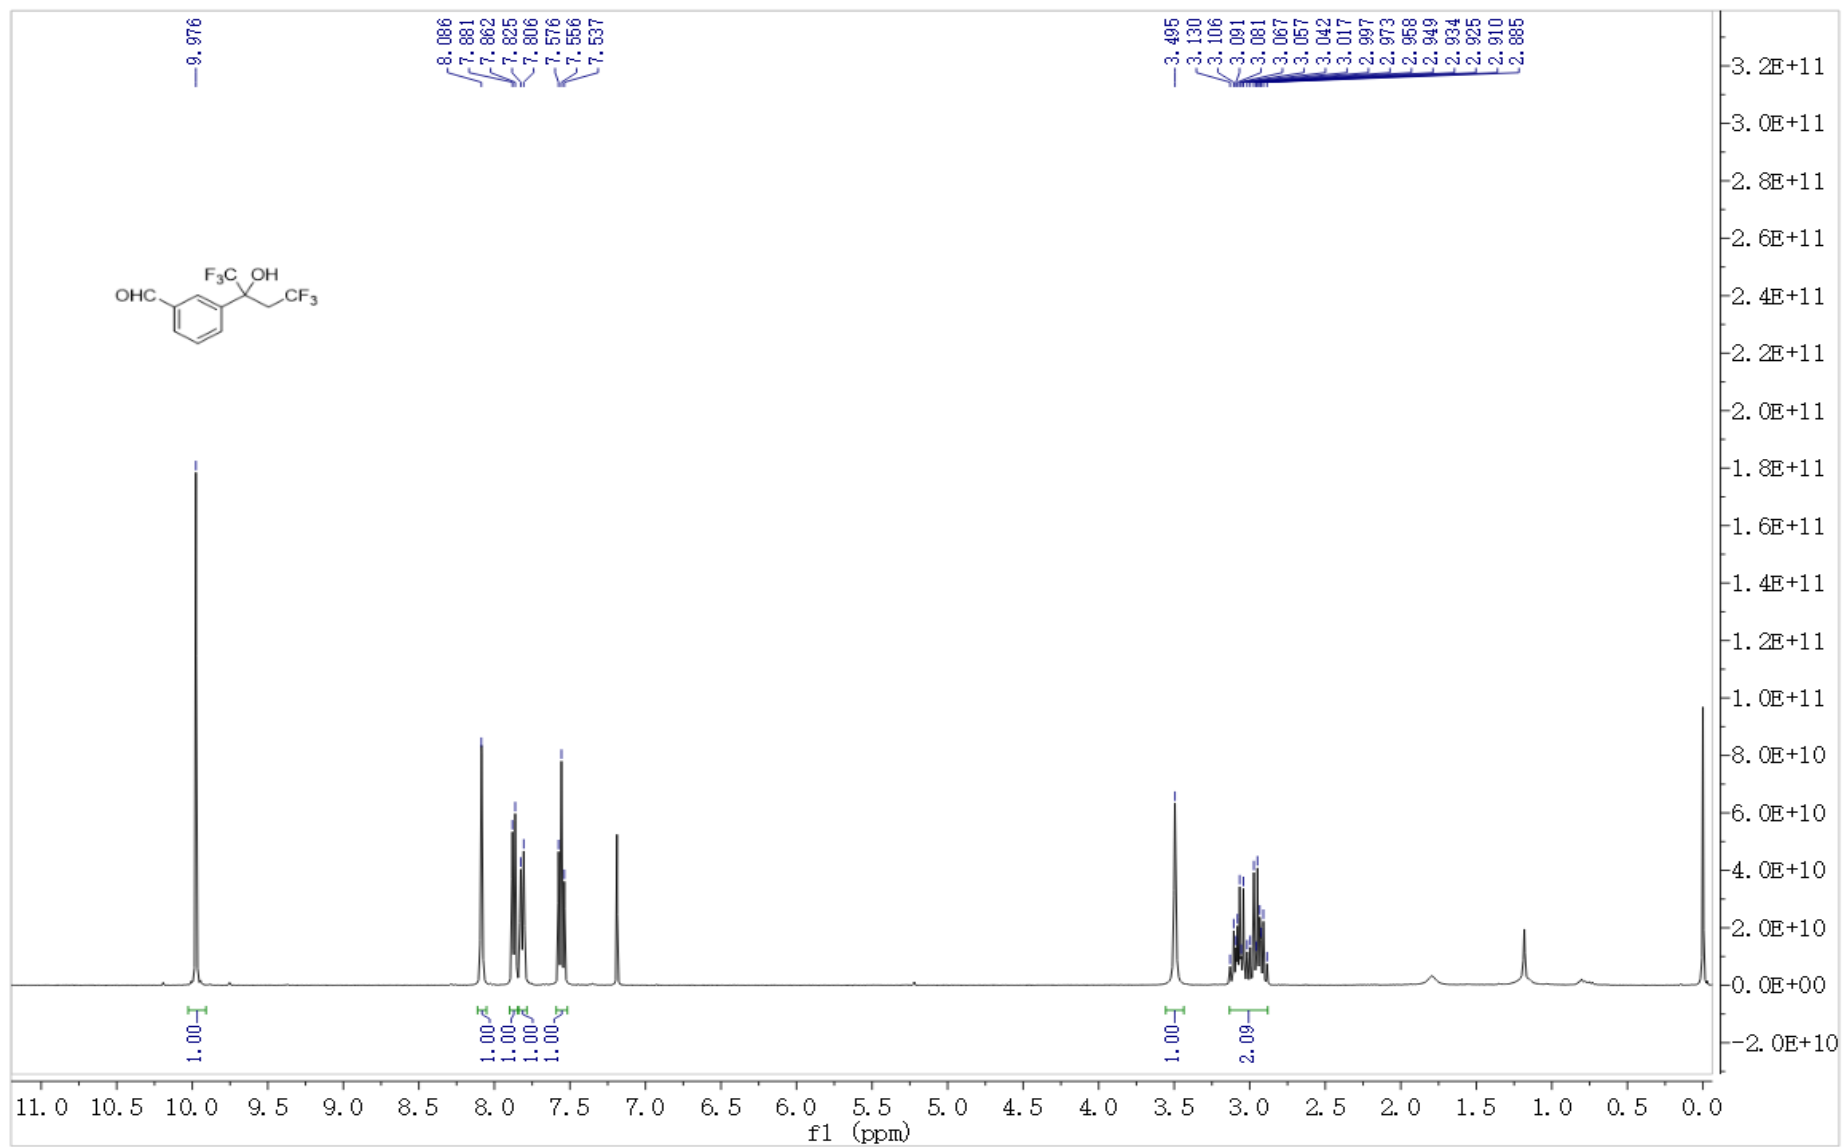

<sup>13</sup>C NMR spectrum of 2t

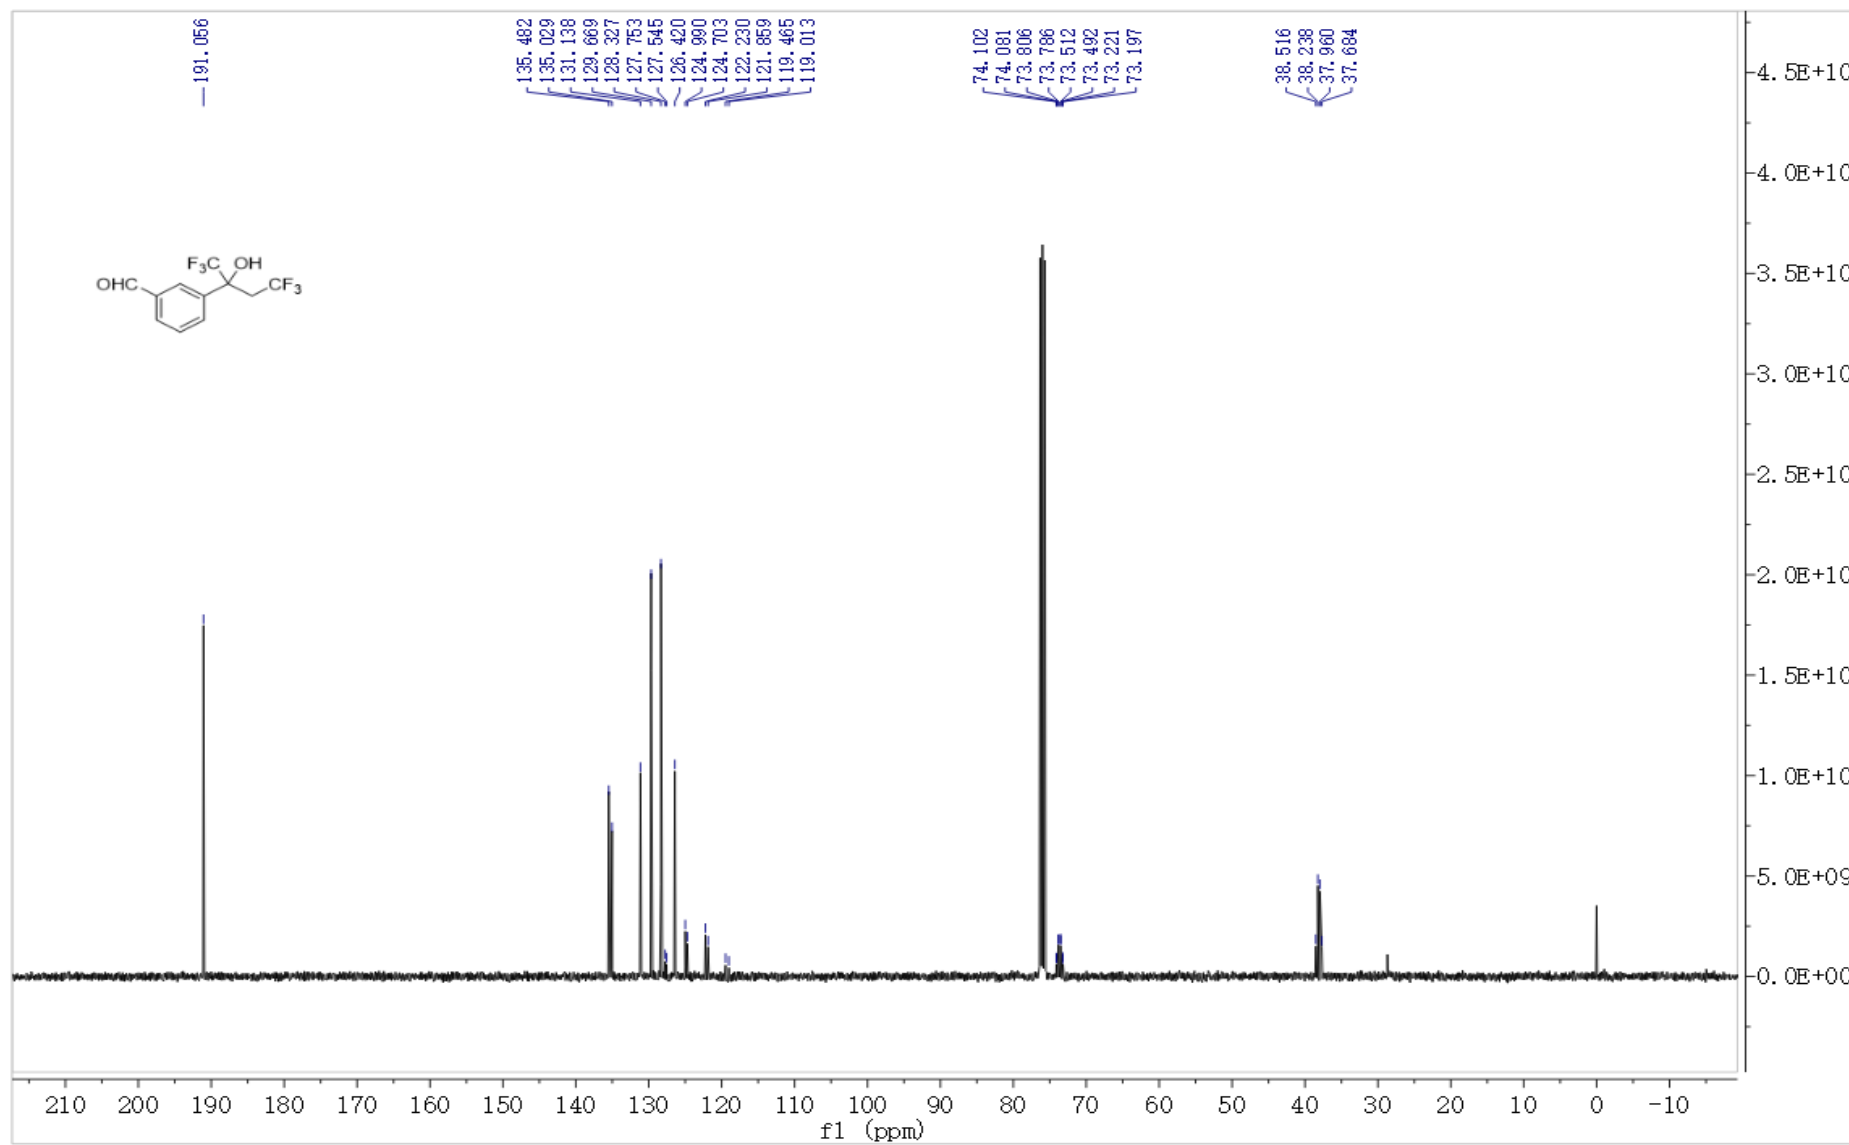



**<sup>19</sup>F NMR spectrum of 2t**

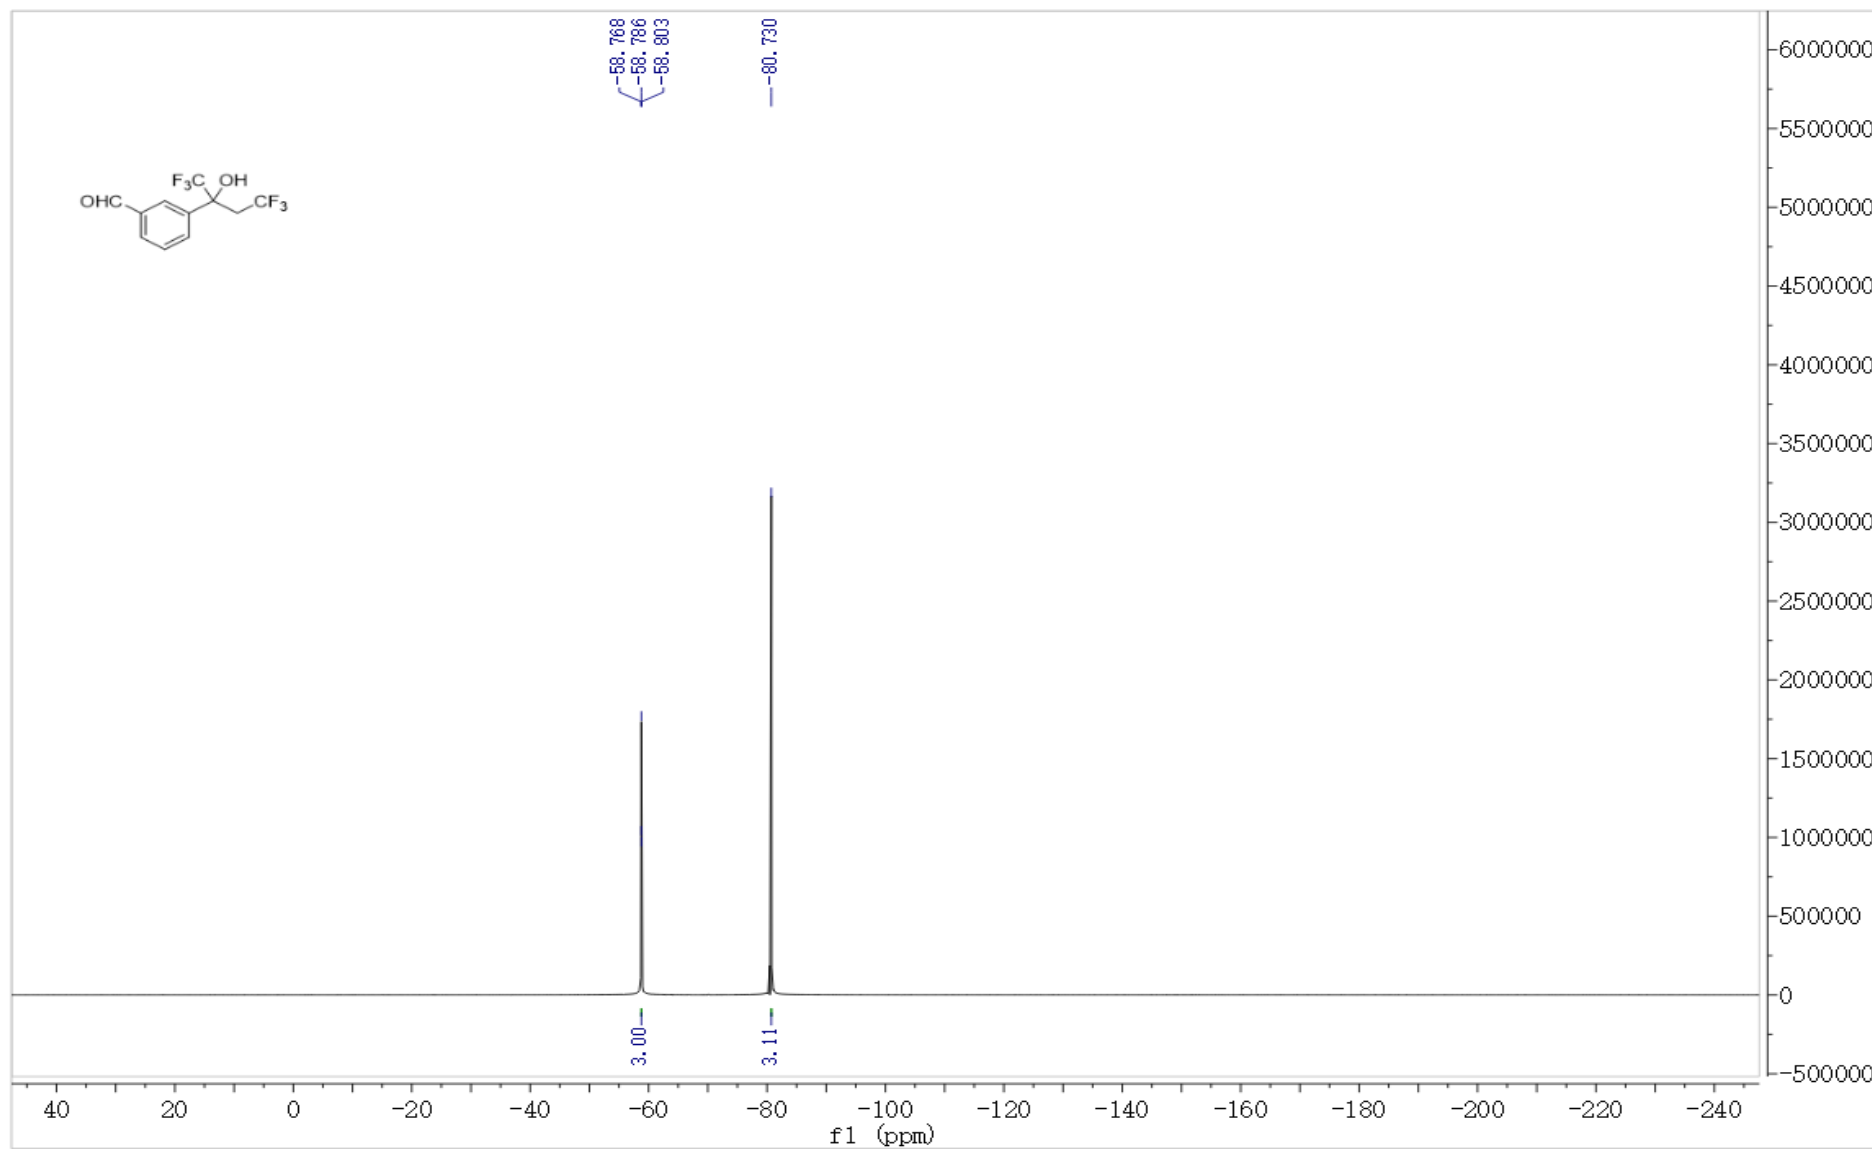

HRMS (EI) spectrum of 2t

CS-LC-M-286

Waters GCT Premier

20212806 143 (2.383) Cm (143-(33+432))

TOF MS EI+  
1.27e4

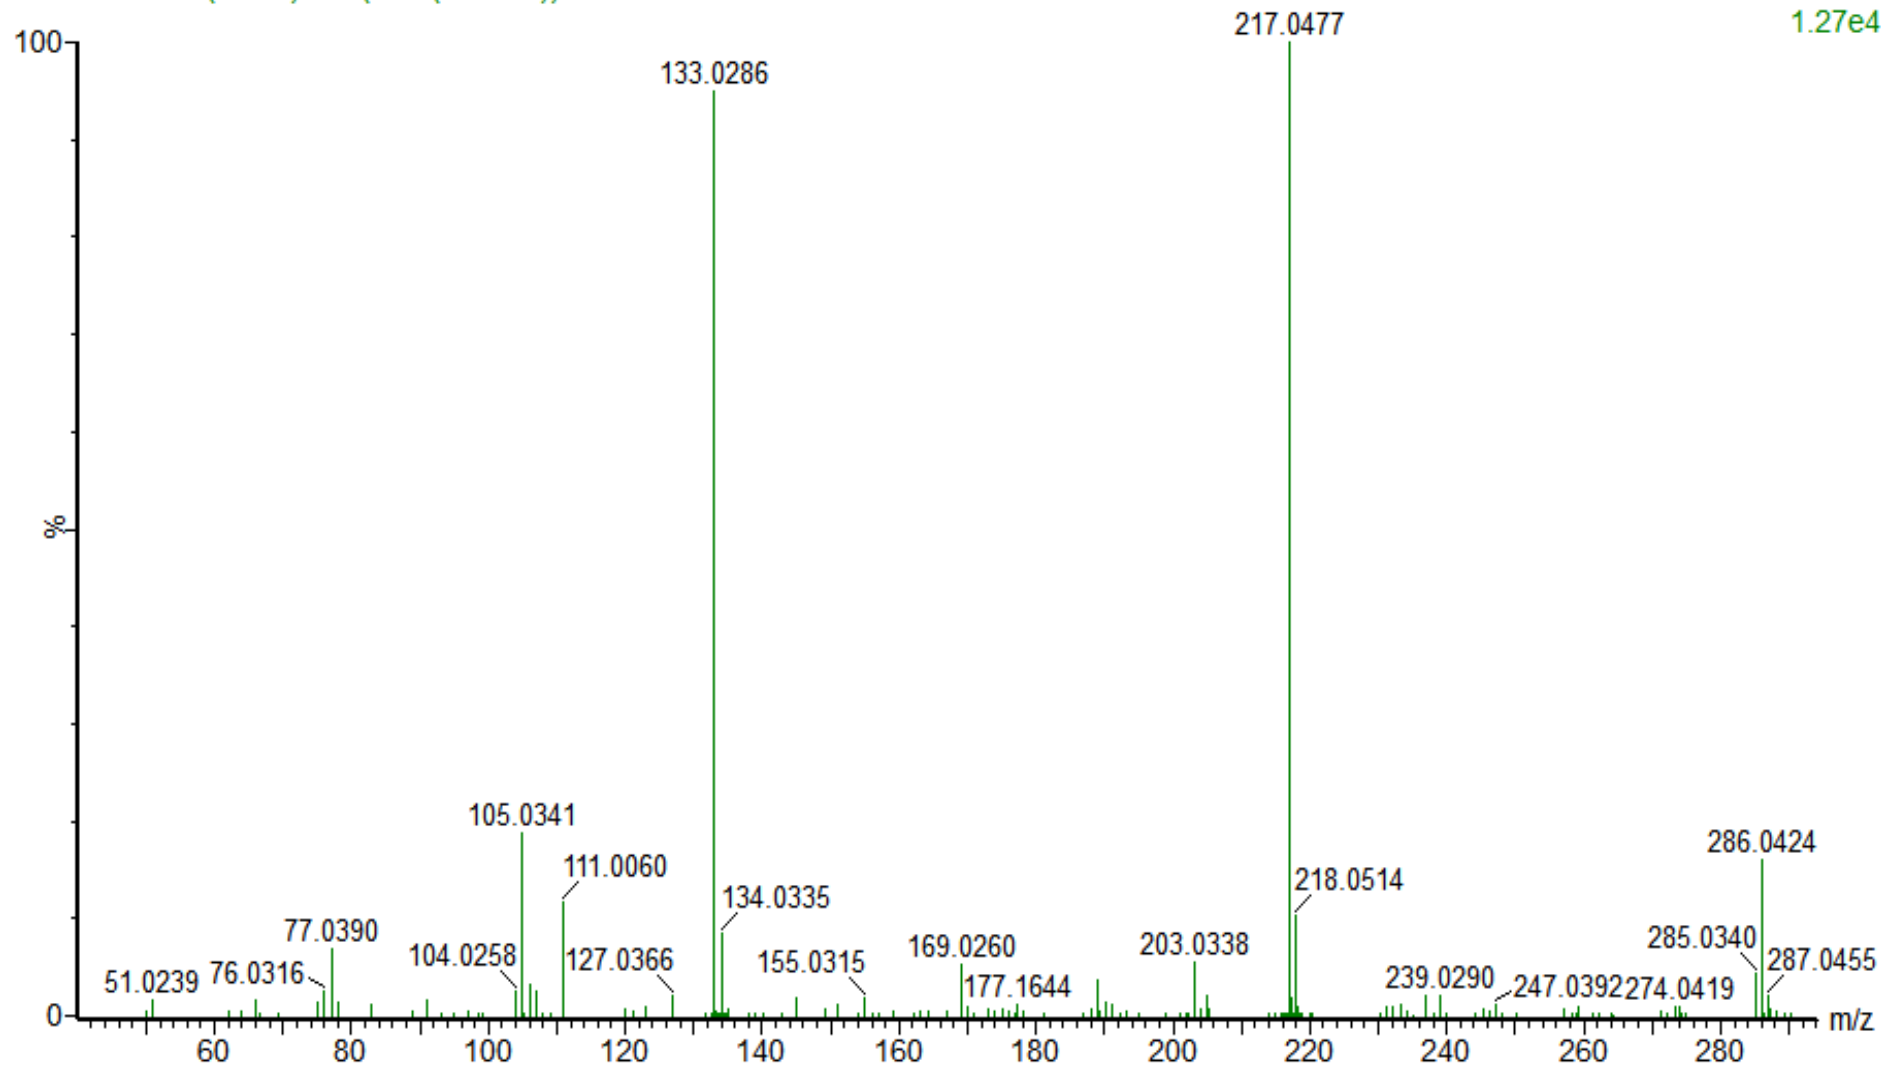

# <sup>1</sup>H NMR spectrum of 2u

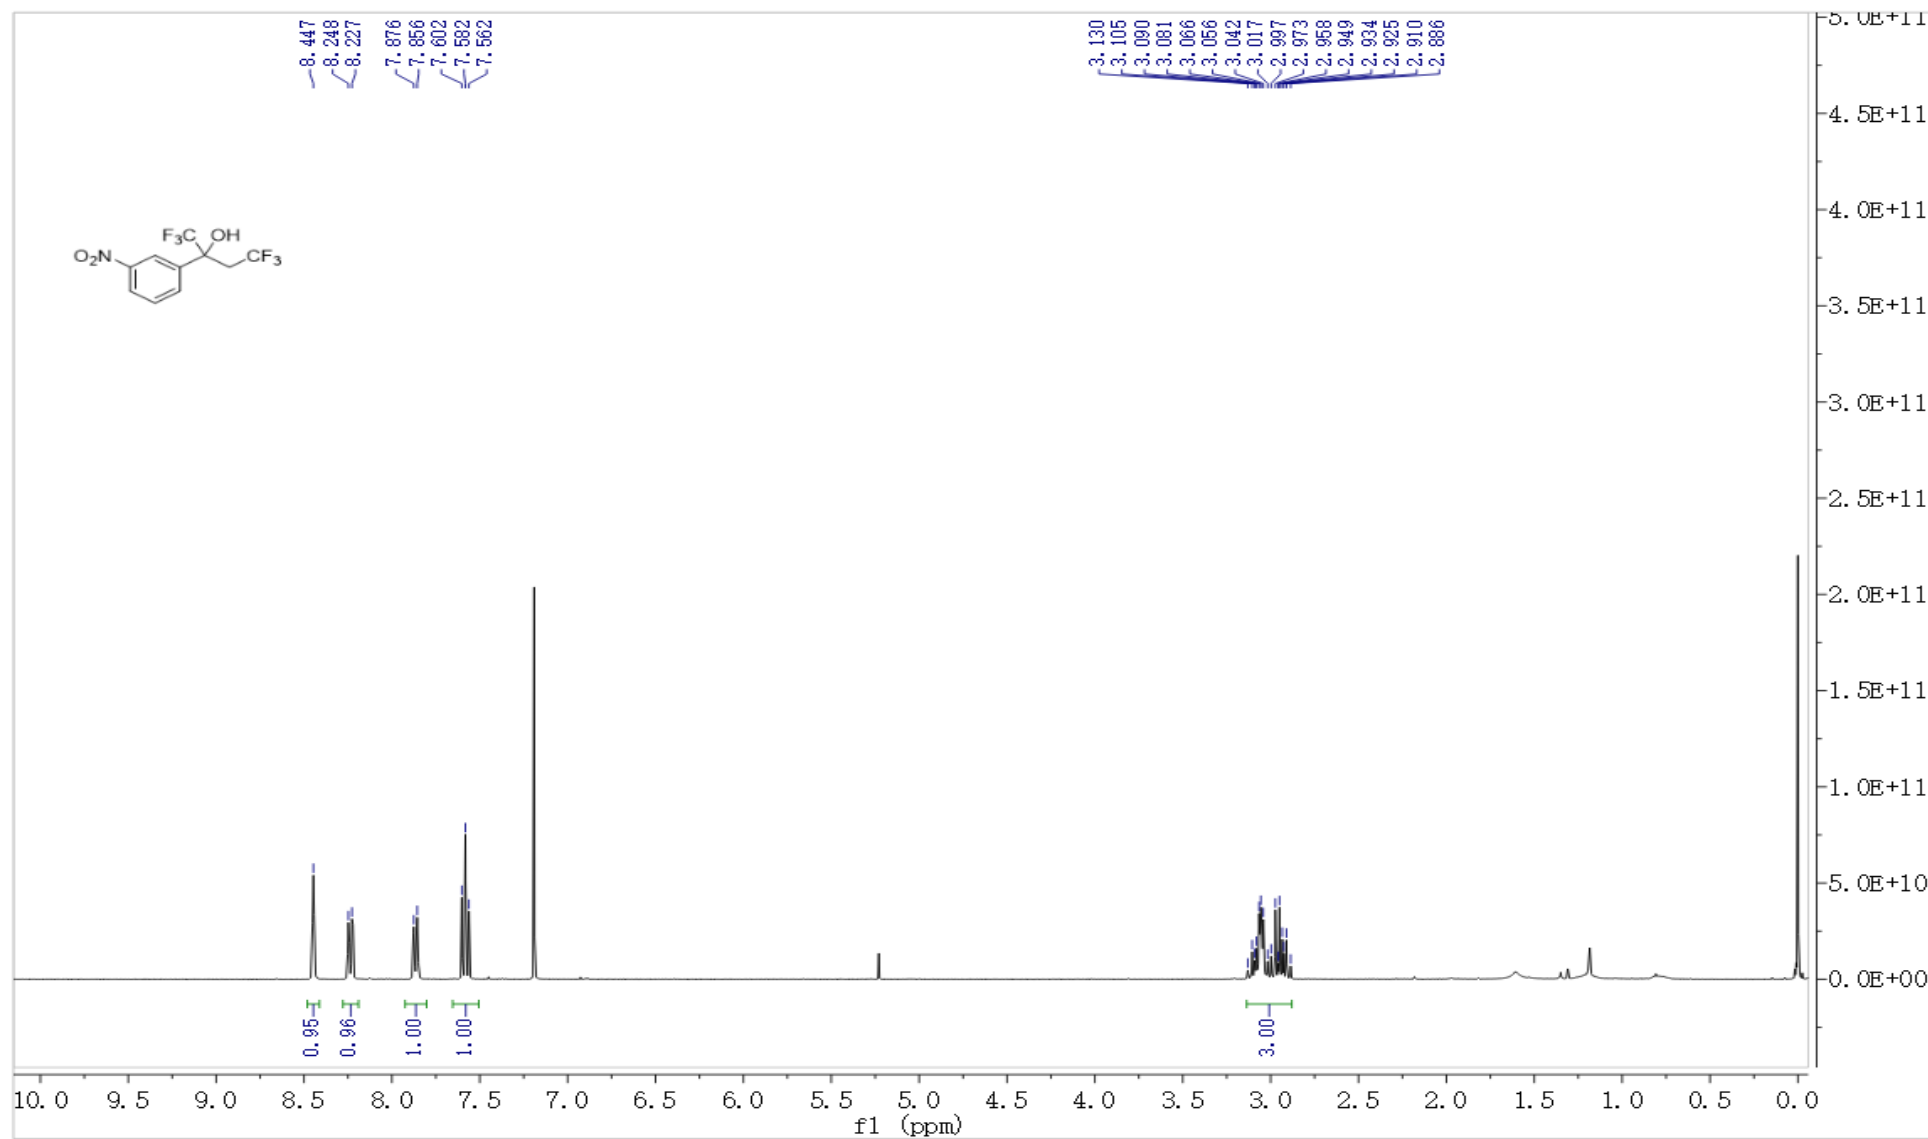

<sup>13</sup>C NMR spectrum of 2u

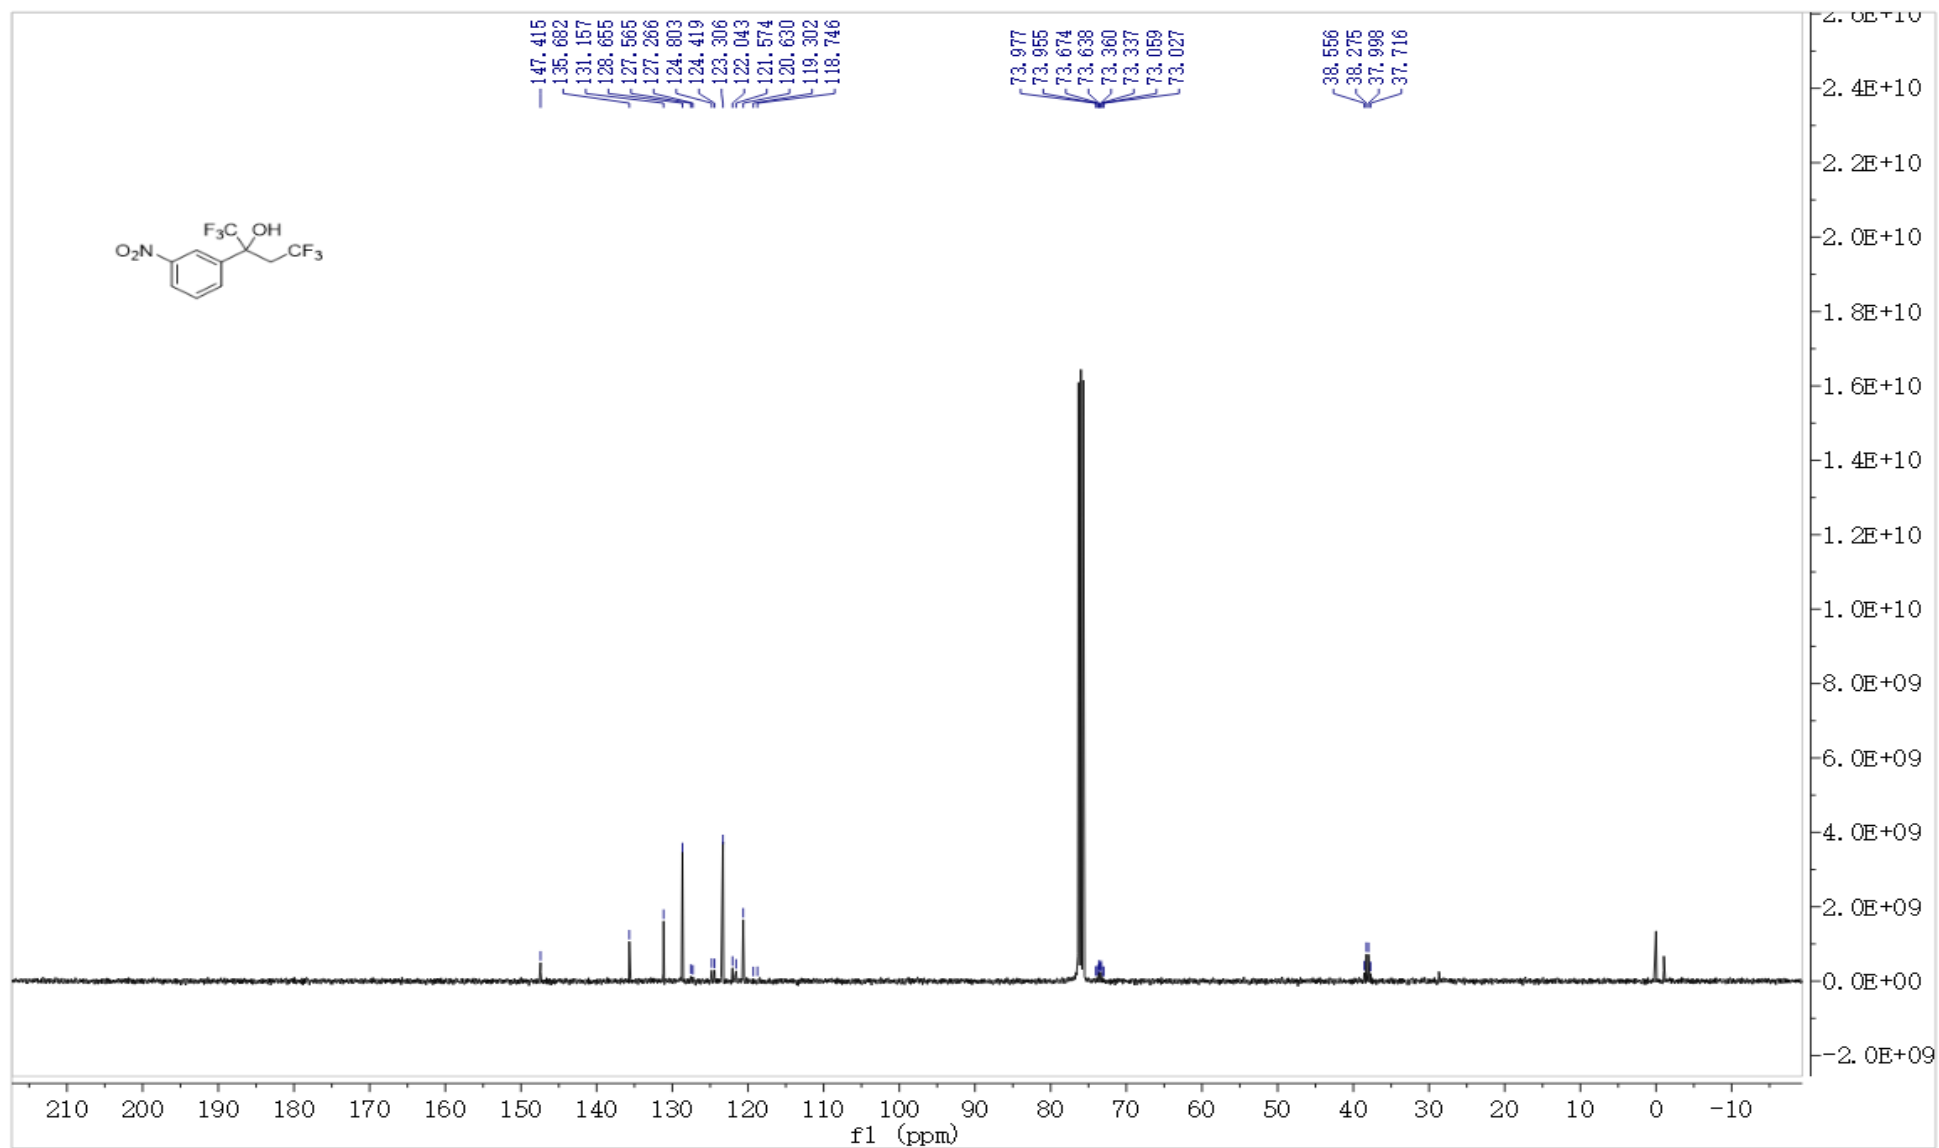

**<sup>19</sup>F NMR spectrum of 2u**

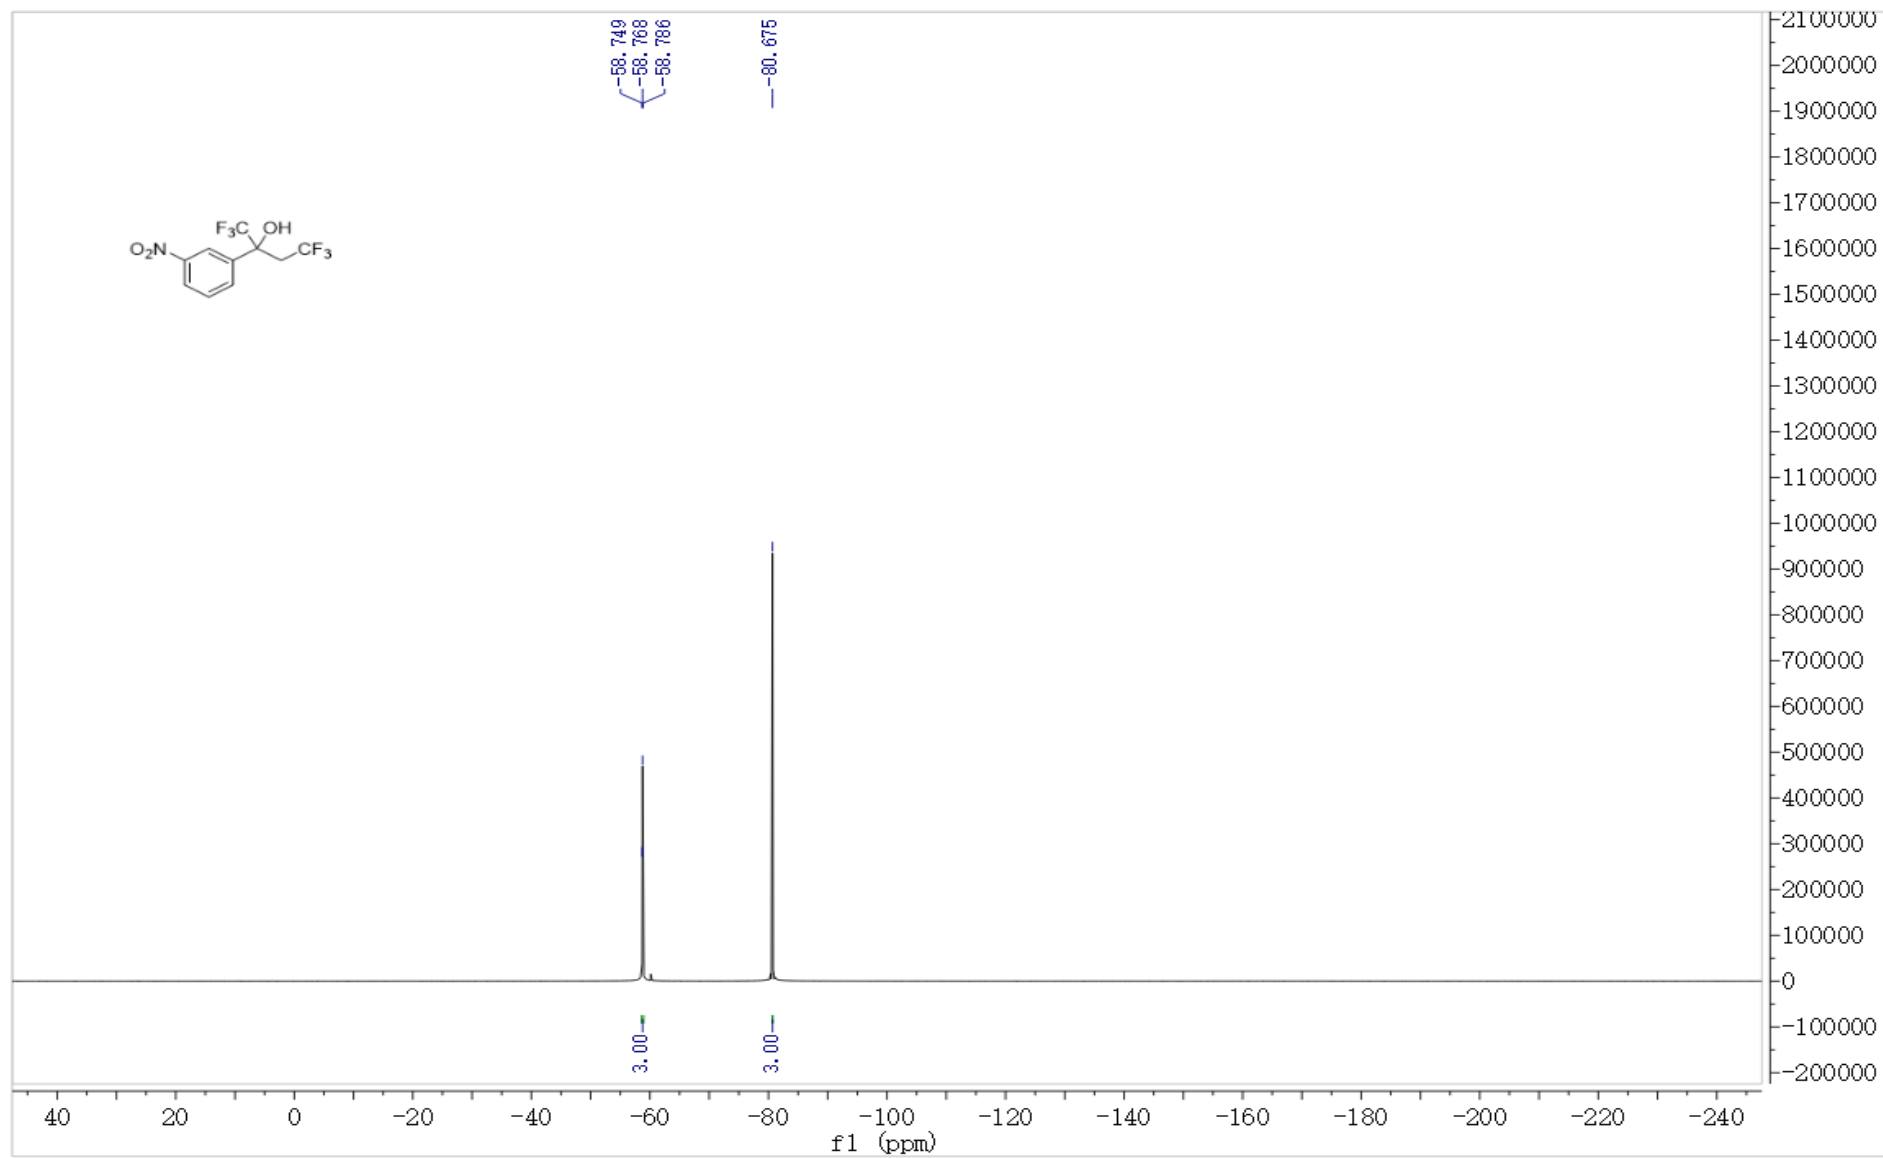

HRMS (EI) spectrum of 2u

CS-LC-M-303

20220308 98 (1.633) Cm (98-(23+60))

Waters GCT Premier

TOF MS EI+  
1.81e4

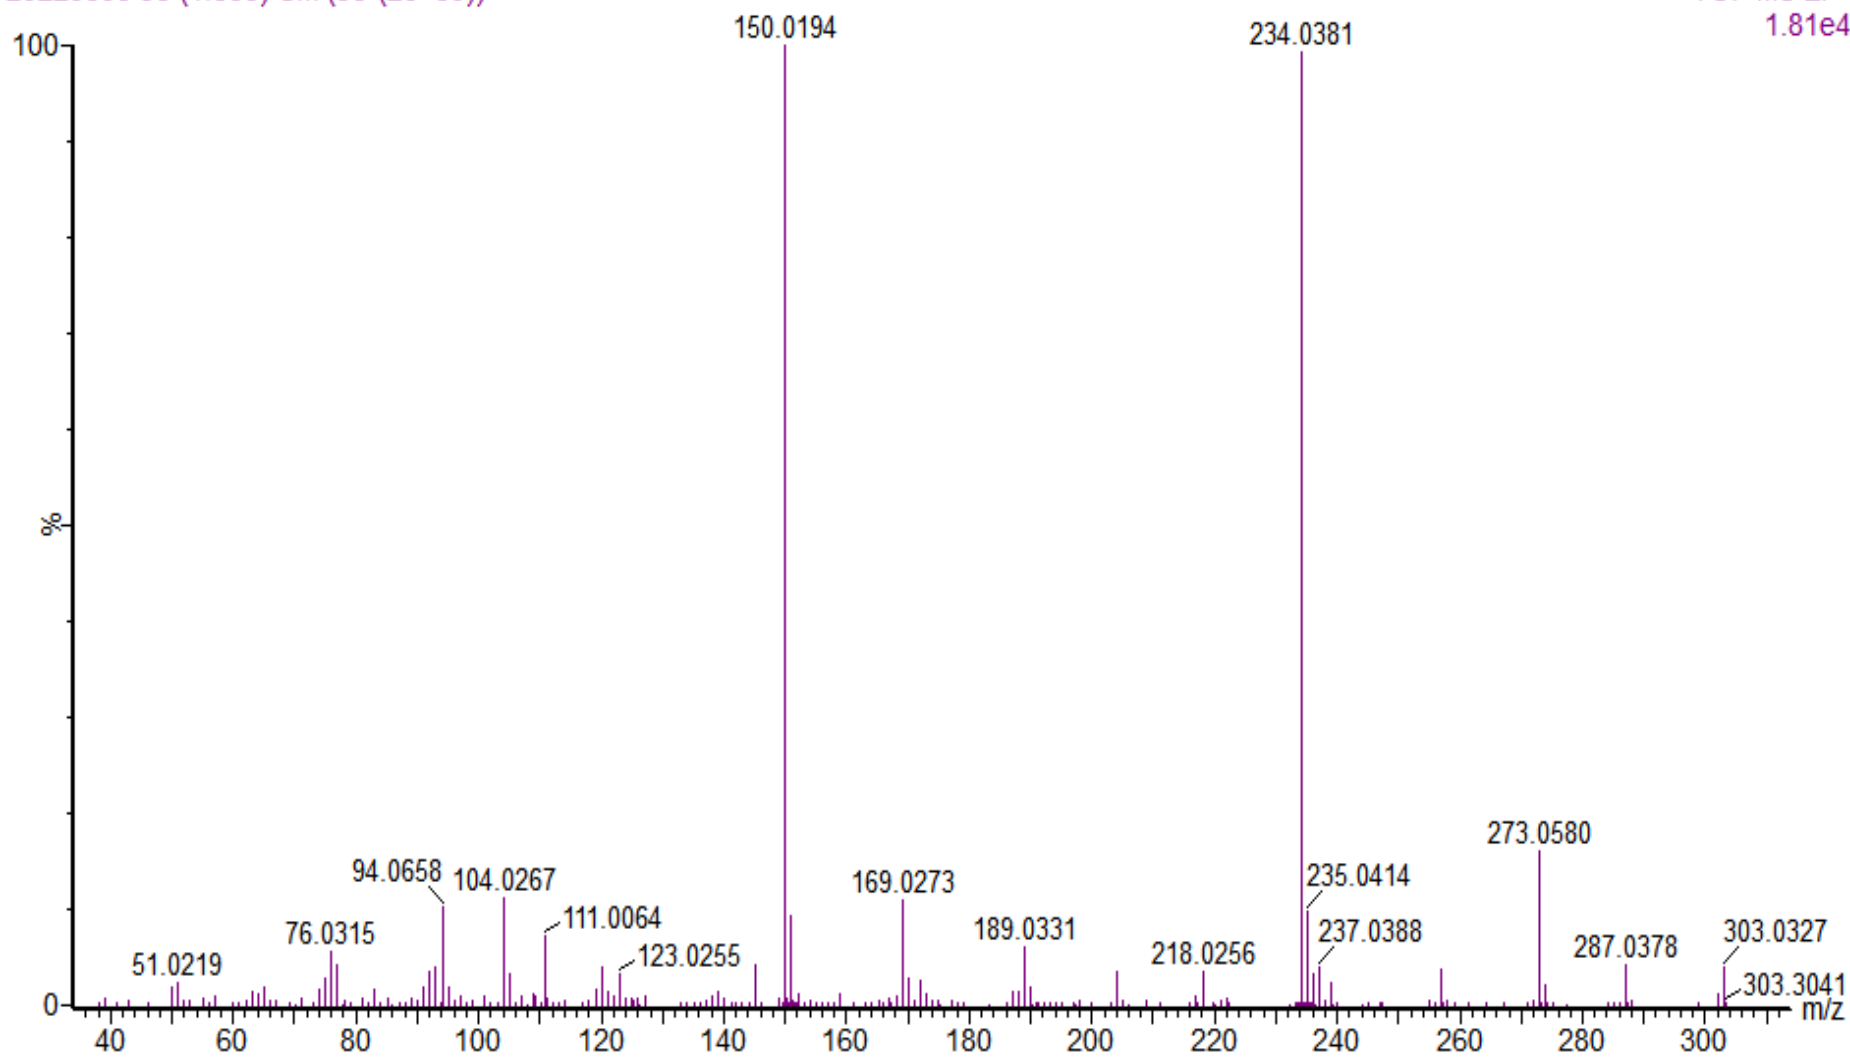

# <sup>1</sup>H NMR spectrum of 2v

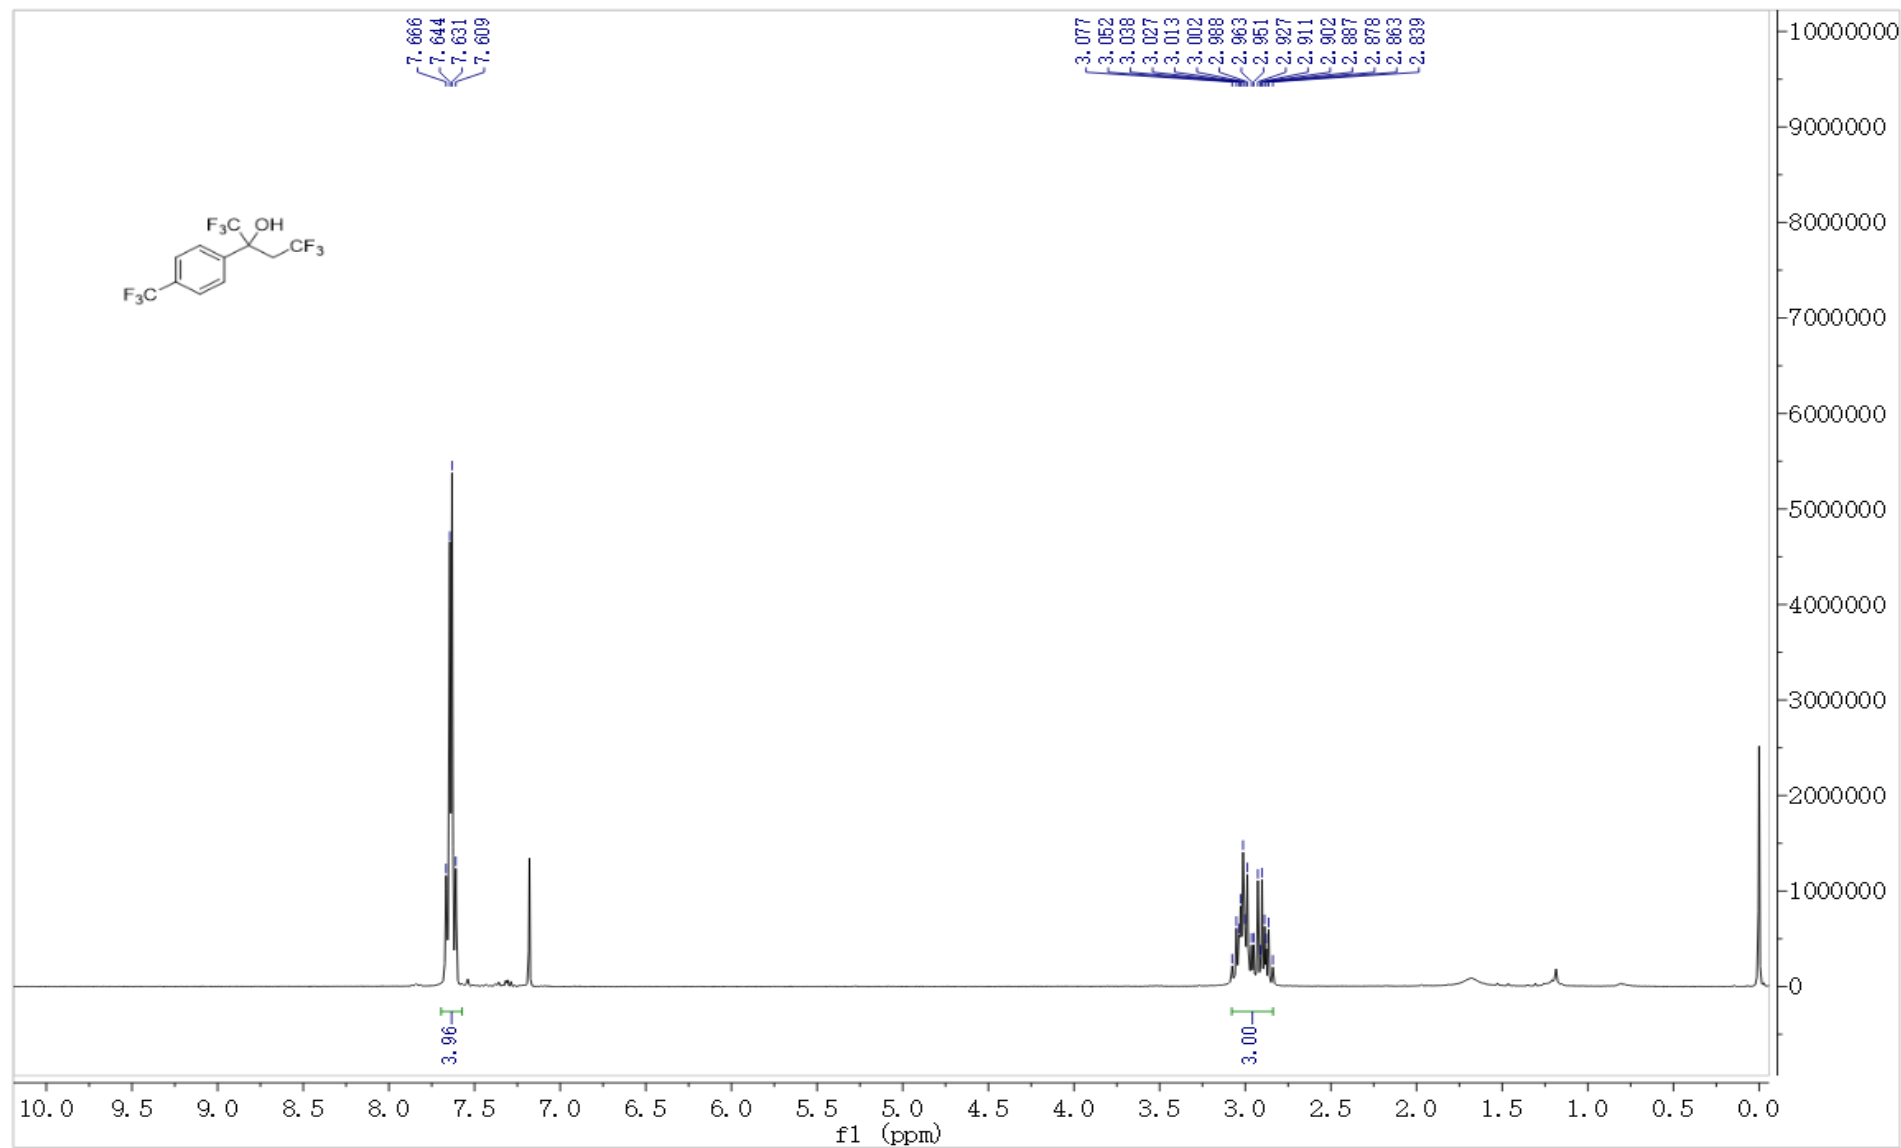

<sup>13</sup>C NMR spectrum of 2v

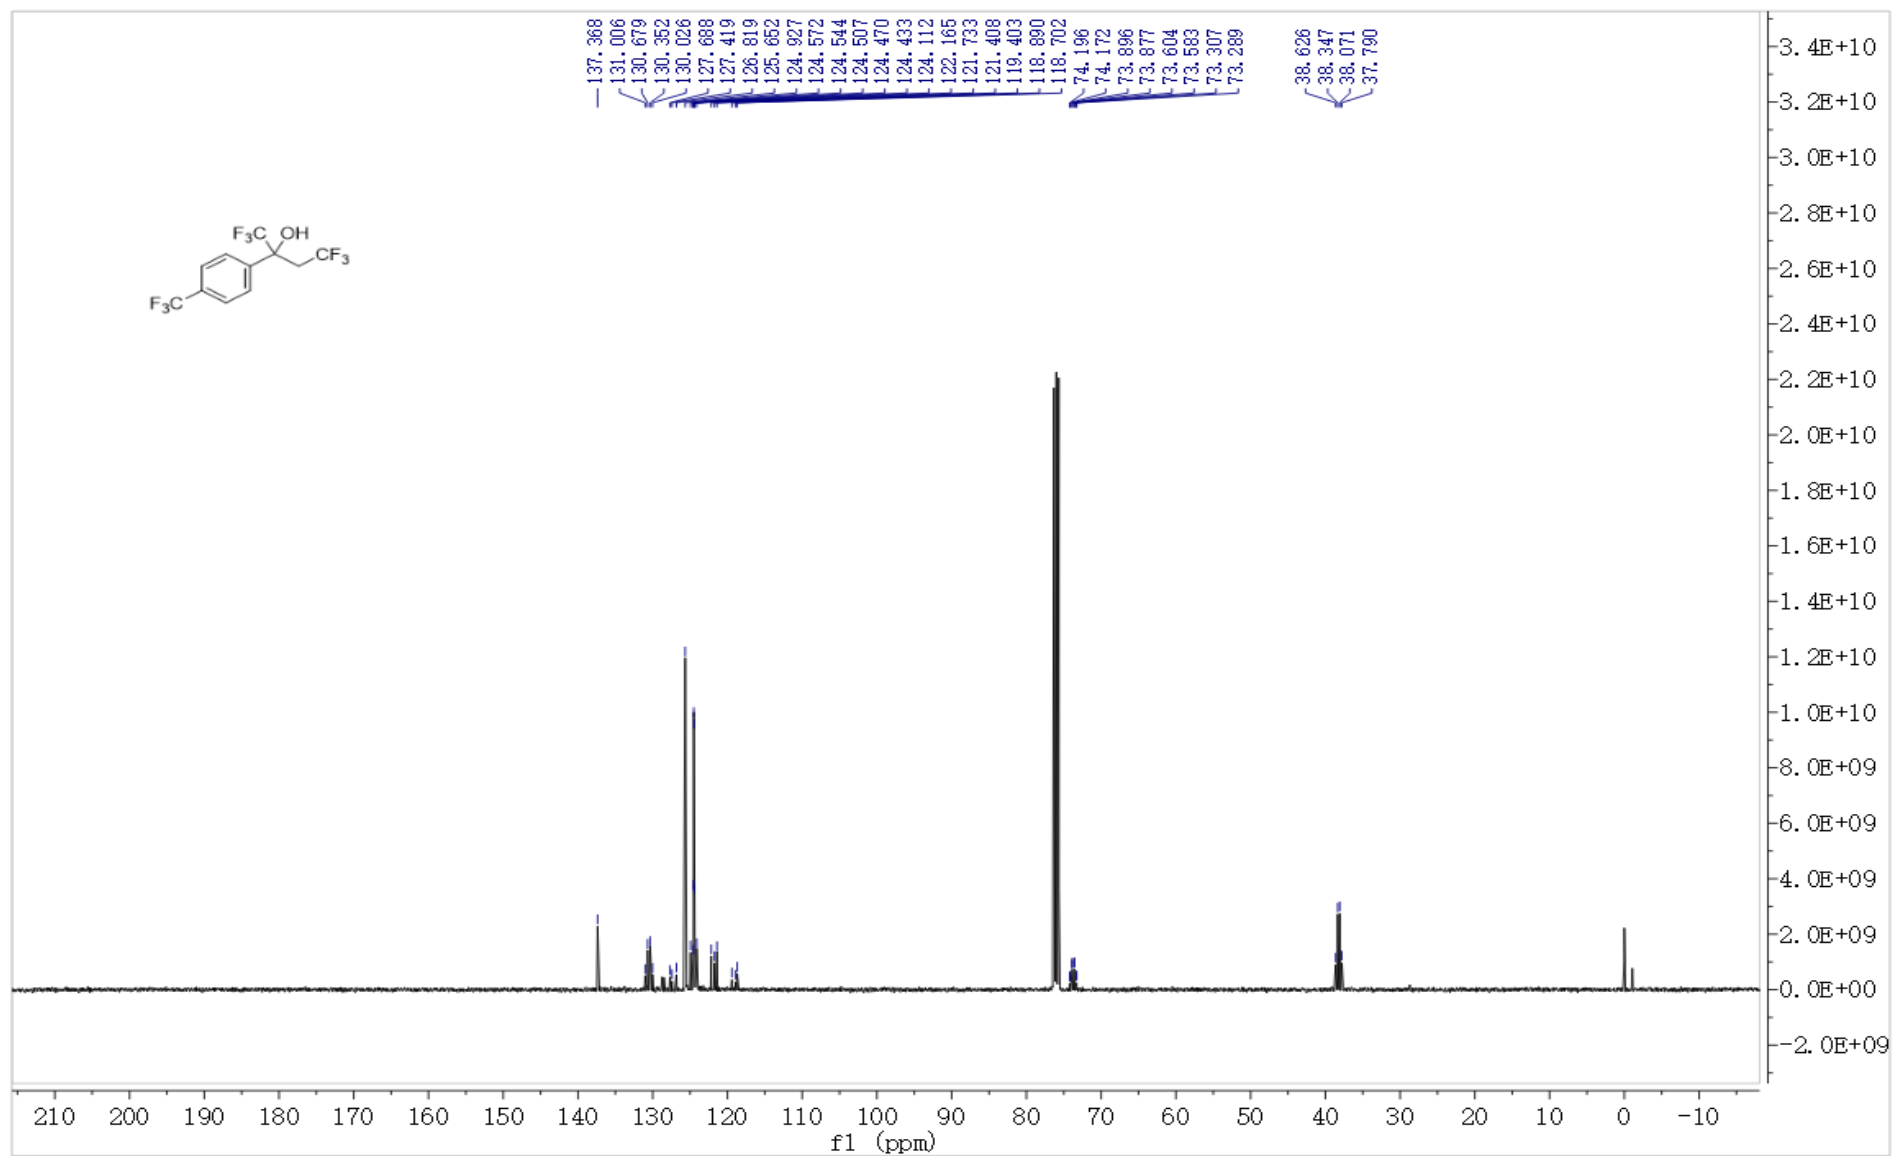



**<sup>19</sup>F NMR spectrum of 2v**

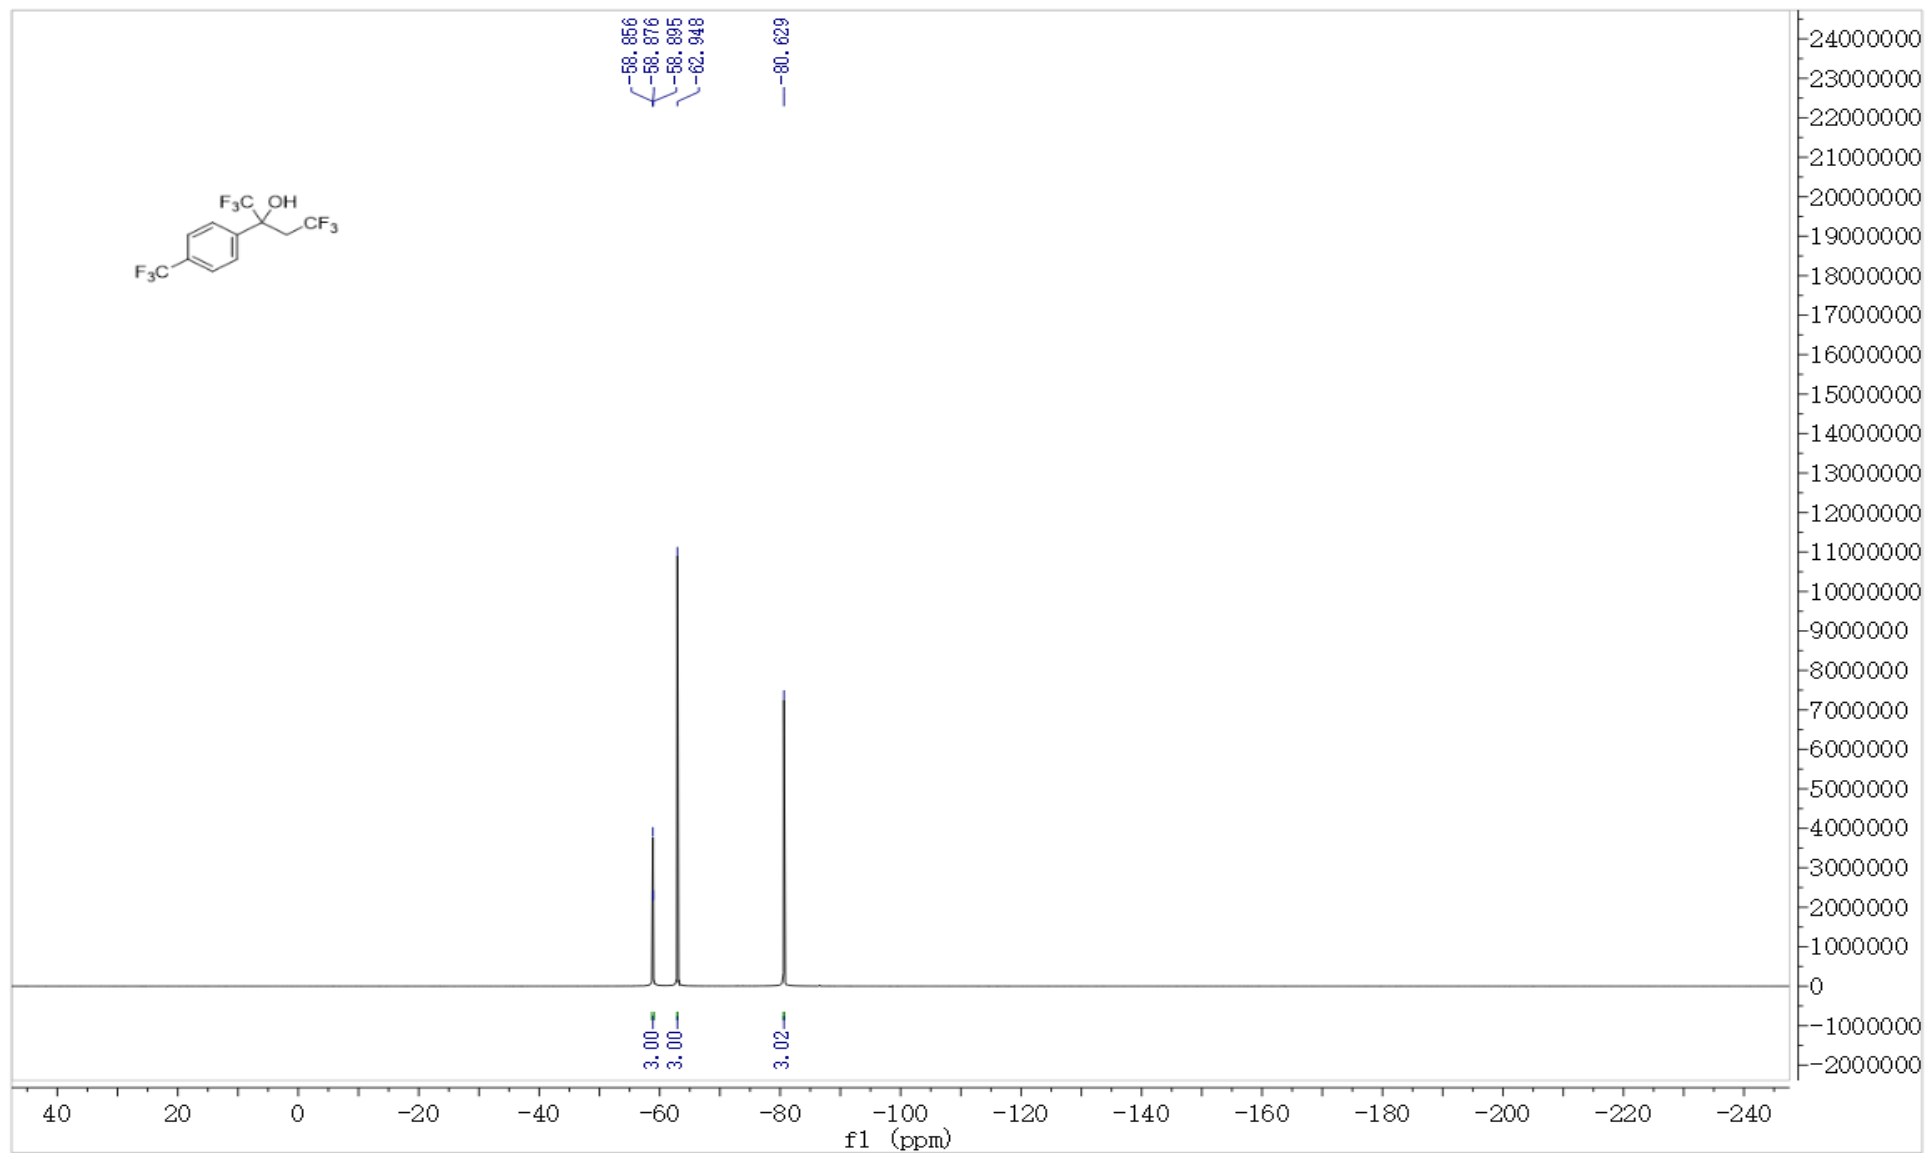

HRMS (EI) spectrum of 2v

CS-LC-P-326

20220302 132 (2.200) Cm (132-(1+21))

Waters GCT Premier

TOF MS EI+  
1.58e4

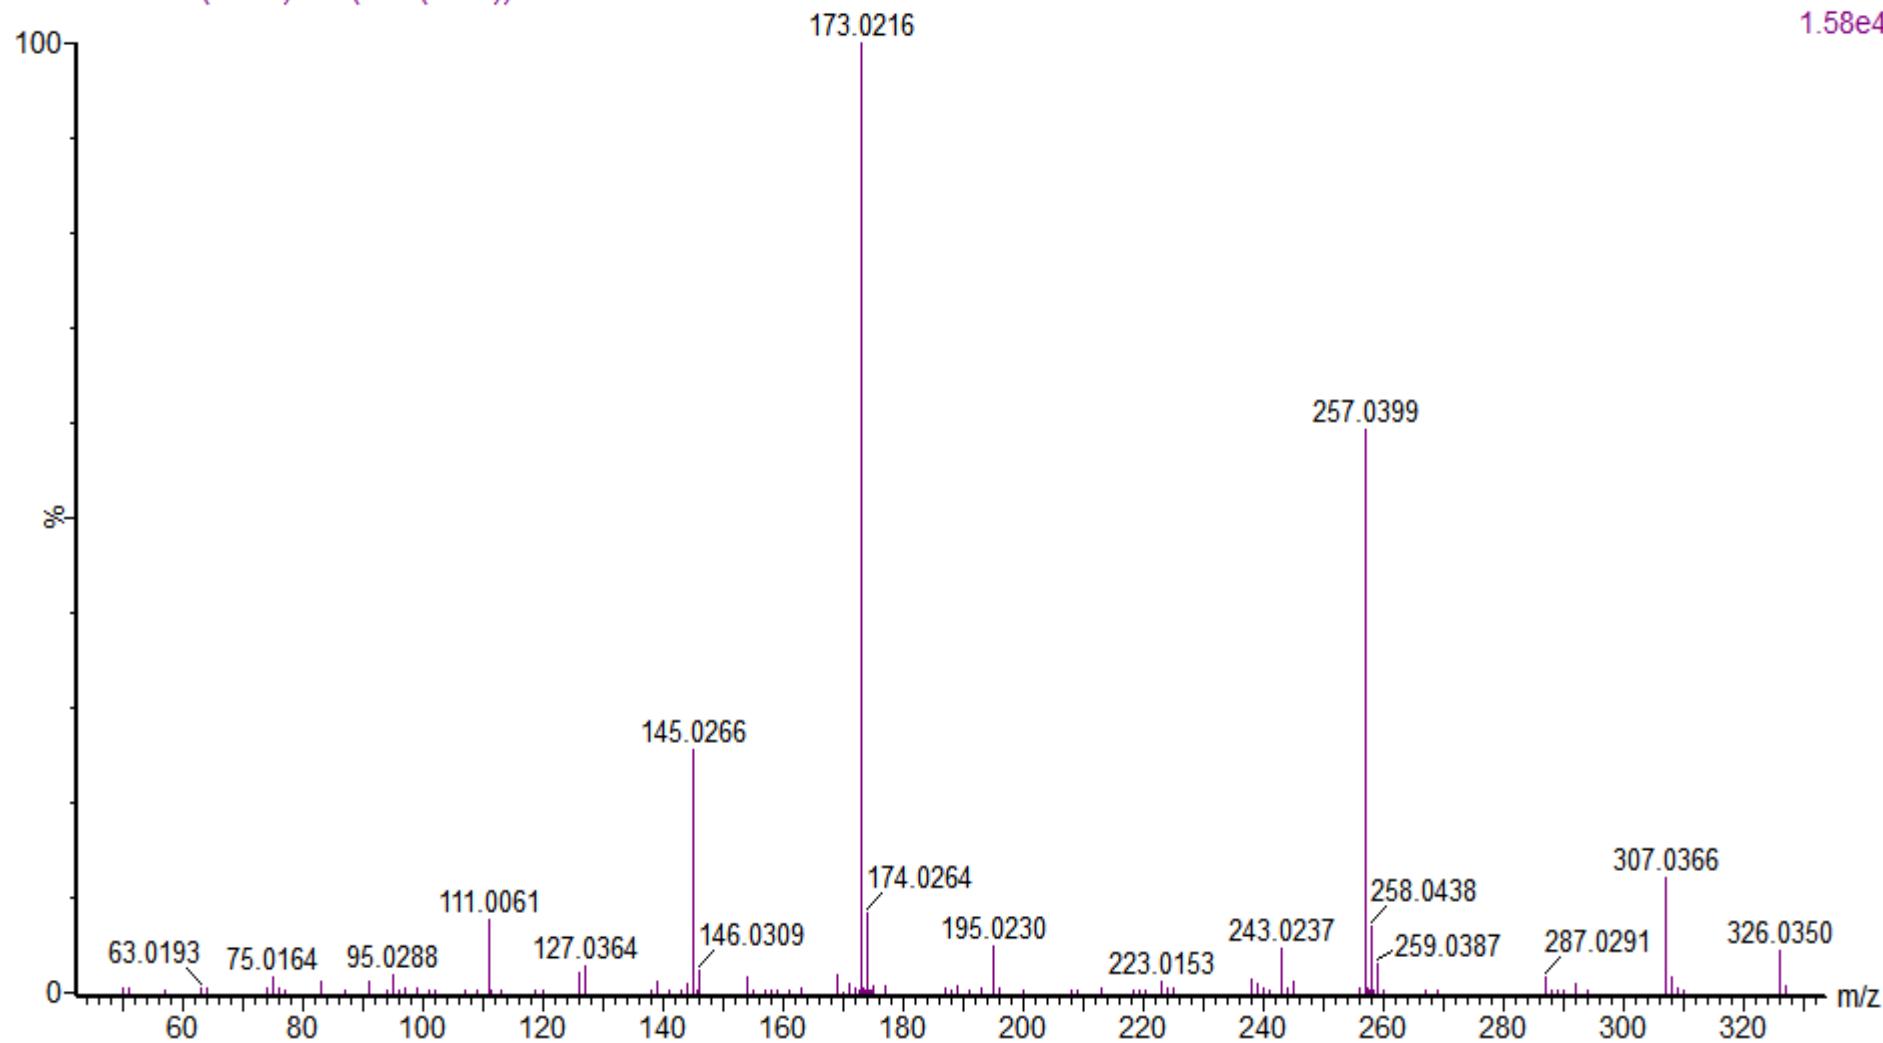

# <sup>1</sup>H NMR spectrum of 2w

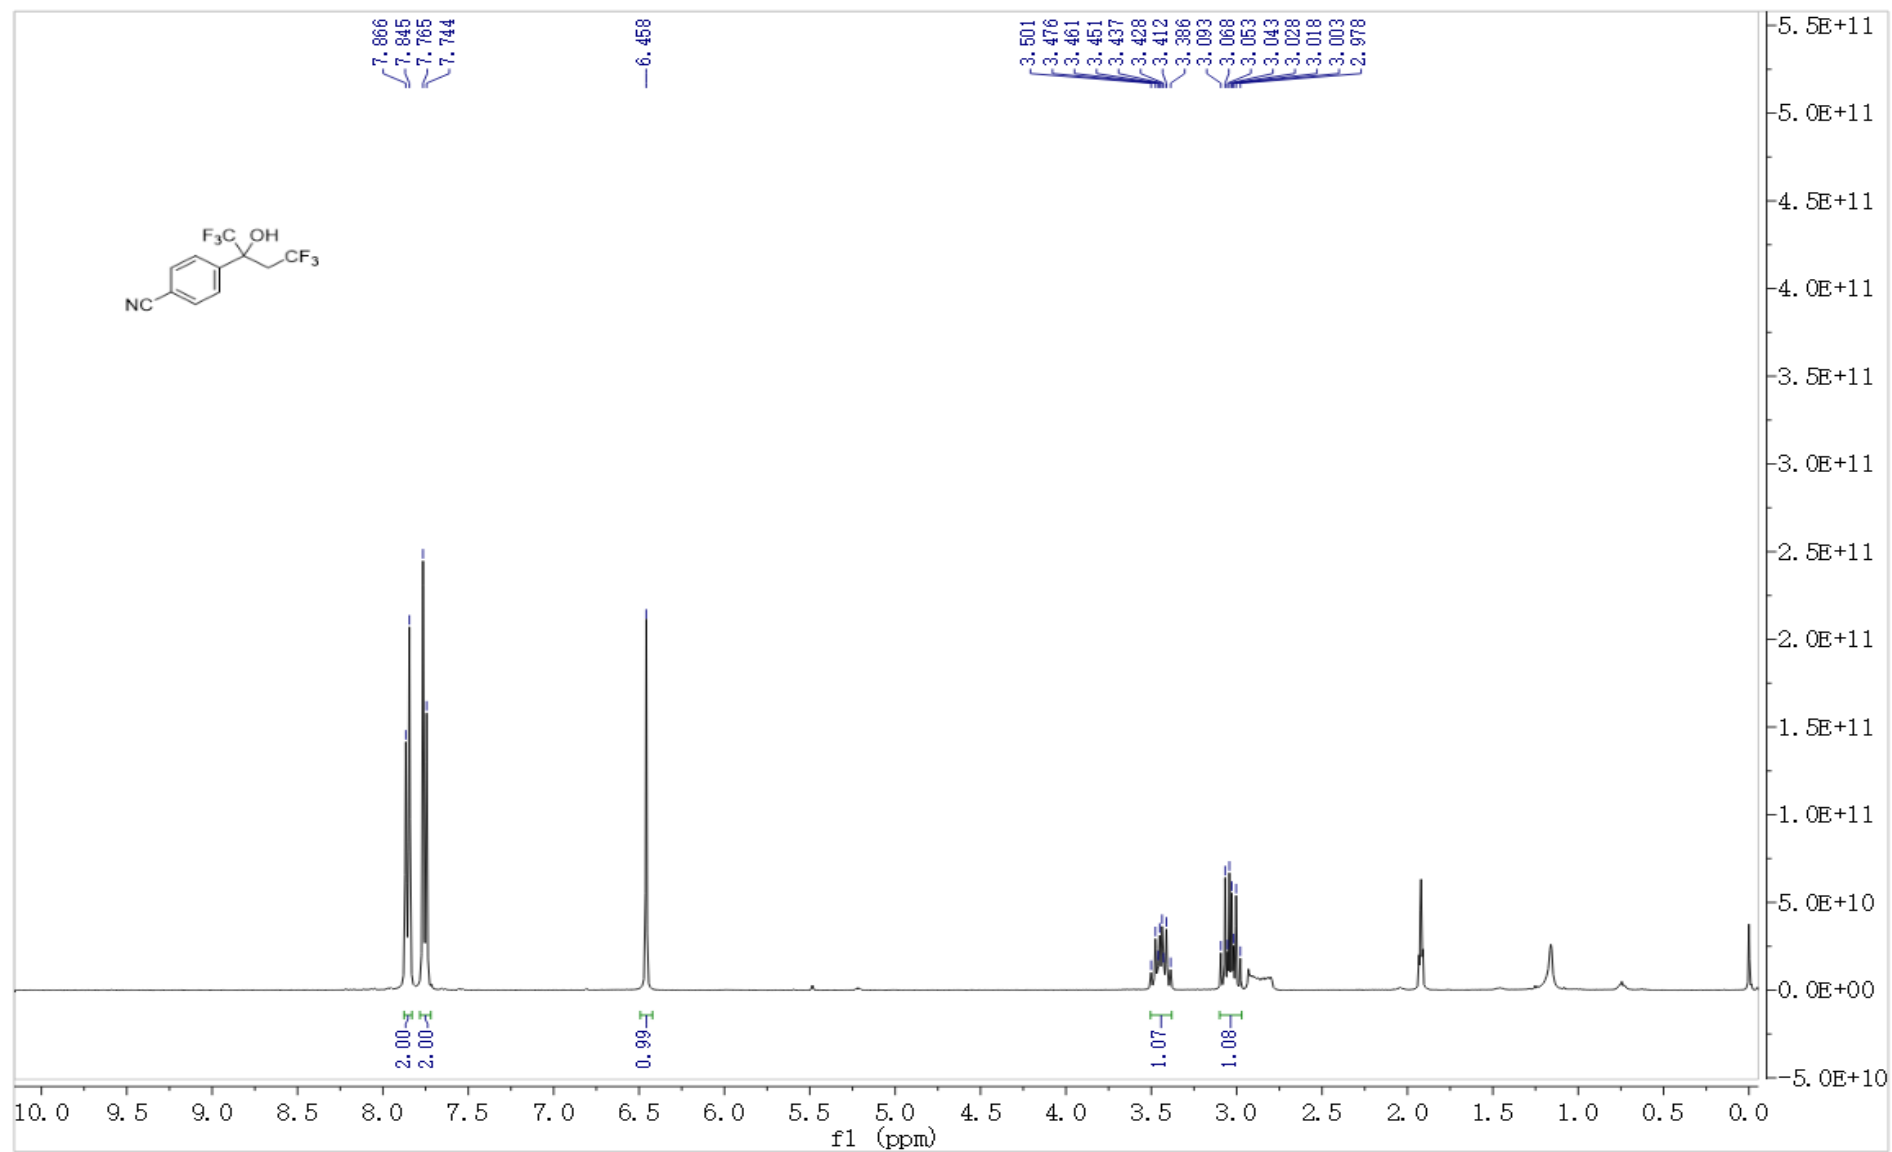

<sup>13</sup>C NMR spectrum of 2w

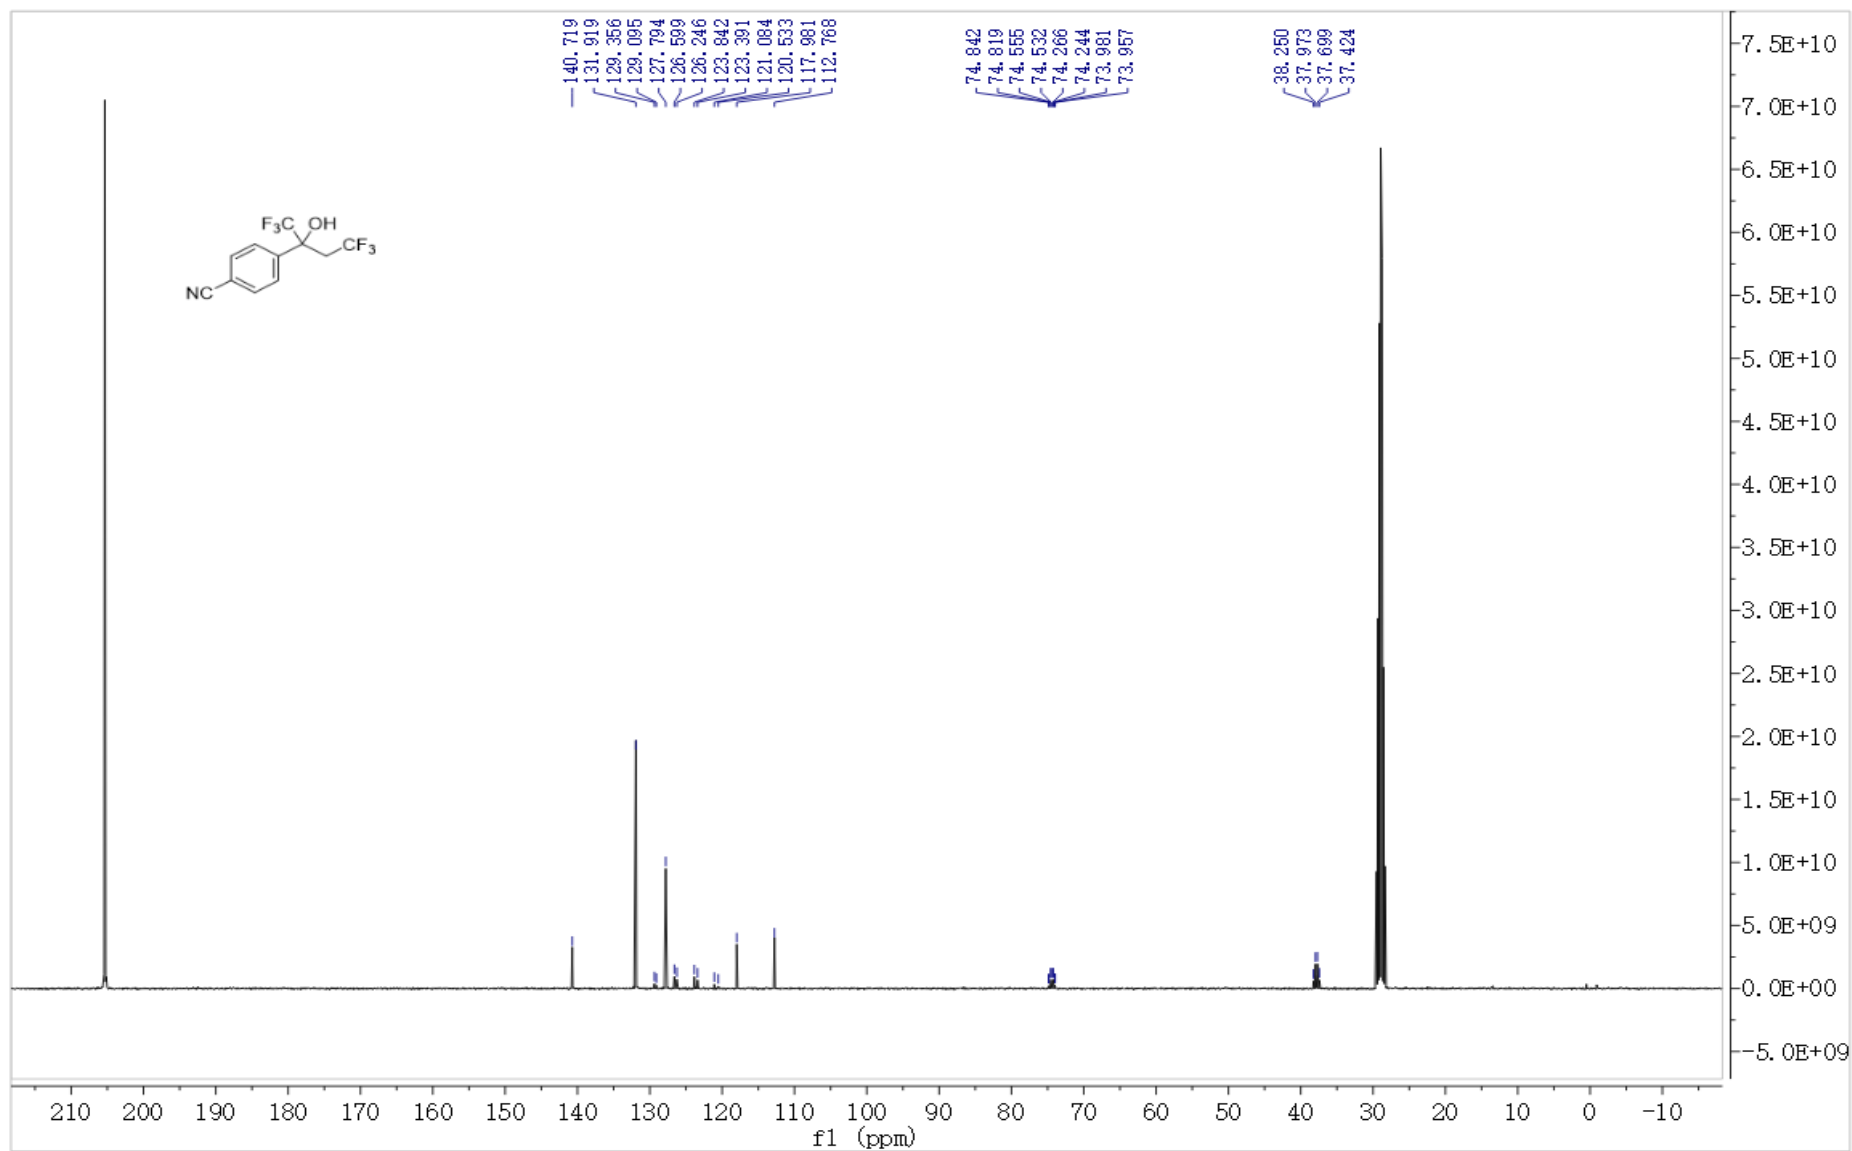

**$^{19}\text{F}$  NMR spectrum of 2w**

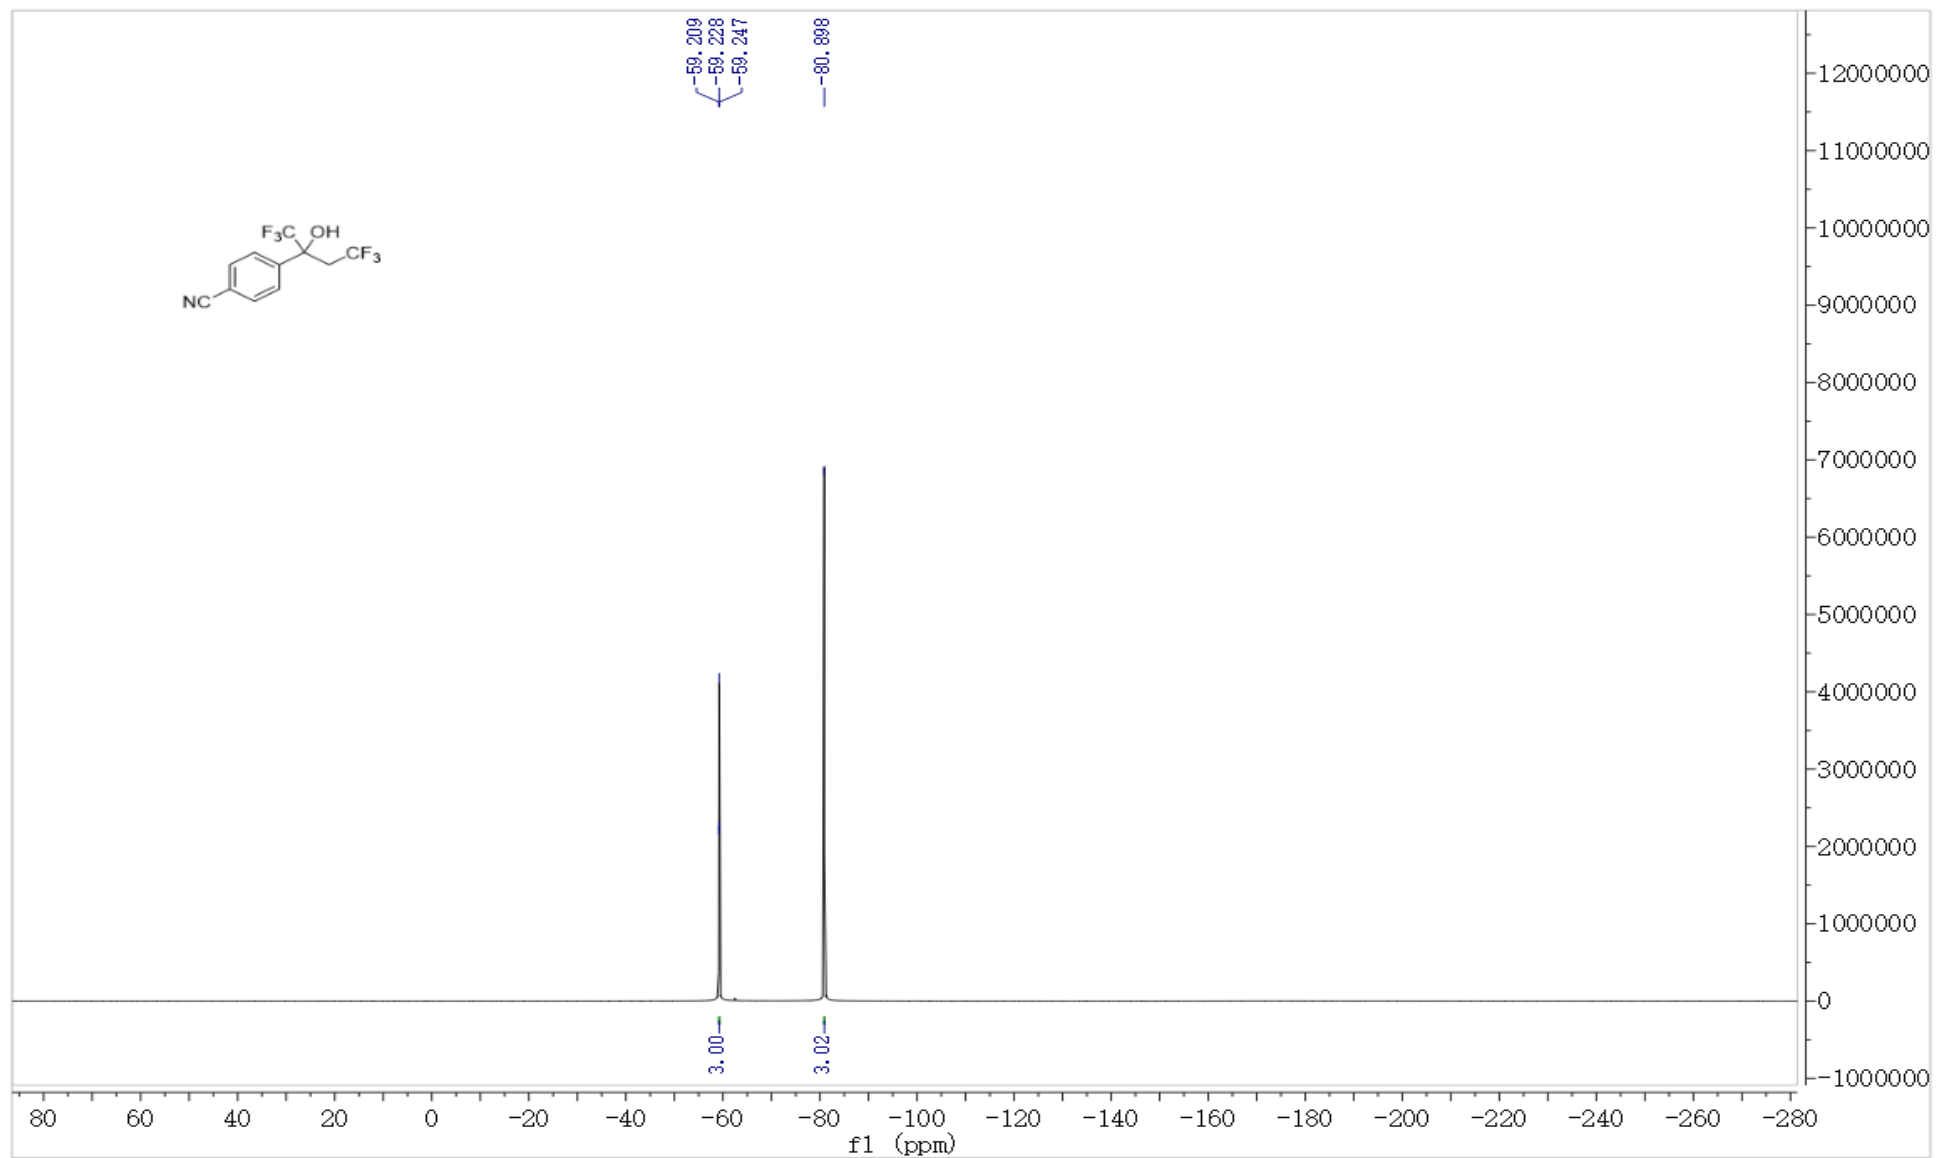

HRMS (EI) spectrum of 2w

CS-LC-P-283

Waters GCT Premier

20220482 239 (3.985) Cm (239-(758+760))

TOF MS EI+  
1.68e4

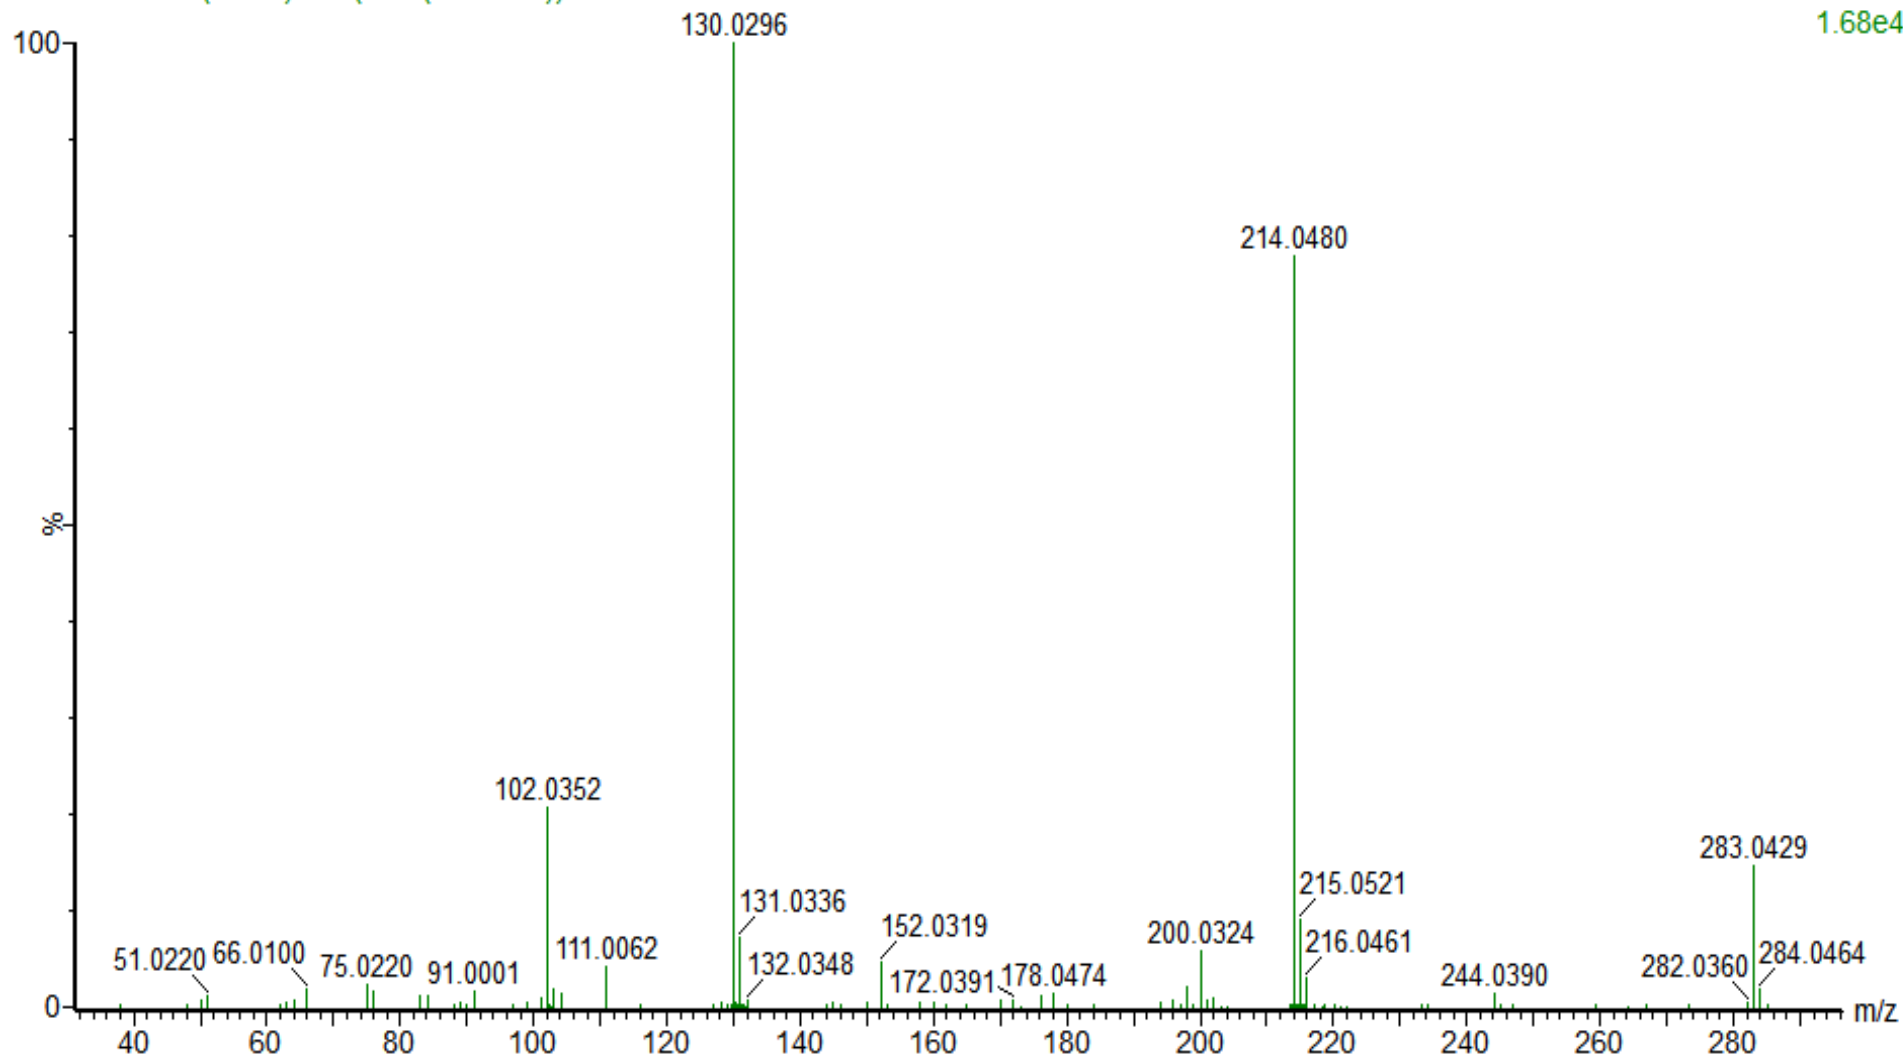

<sup>1</sup>H NMR spectrum of 4a

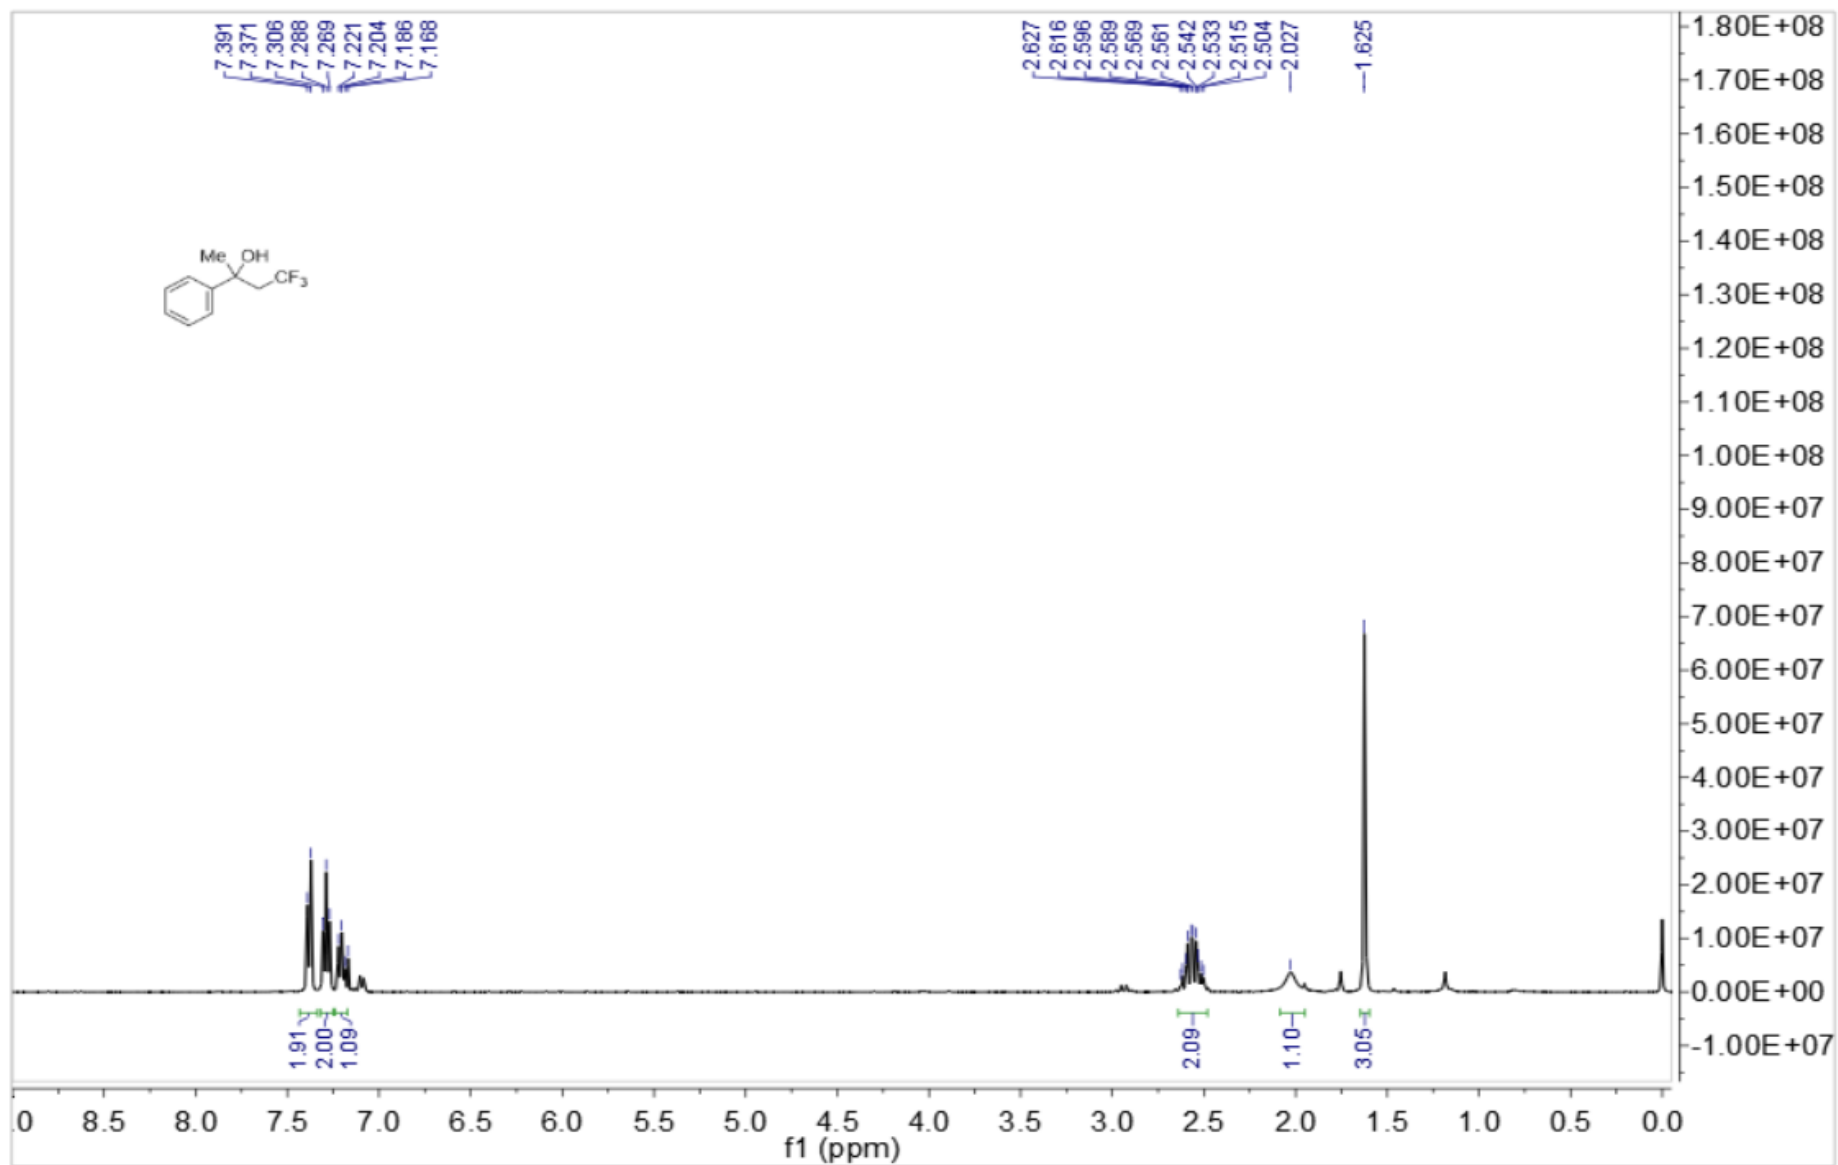

<sup>13</sup>C NMR spectrum of 4a

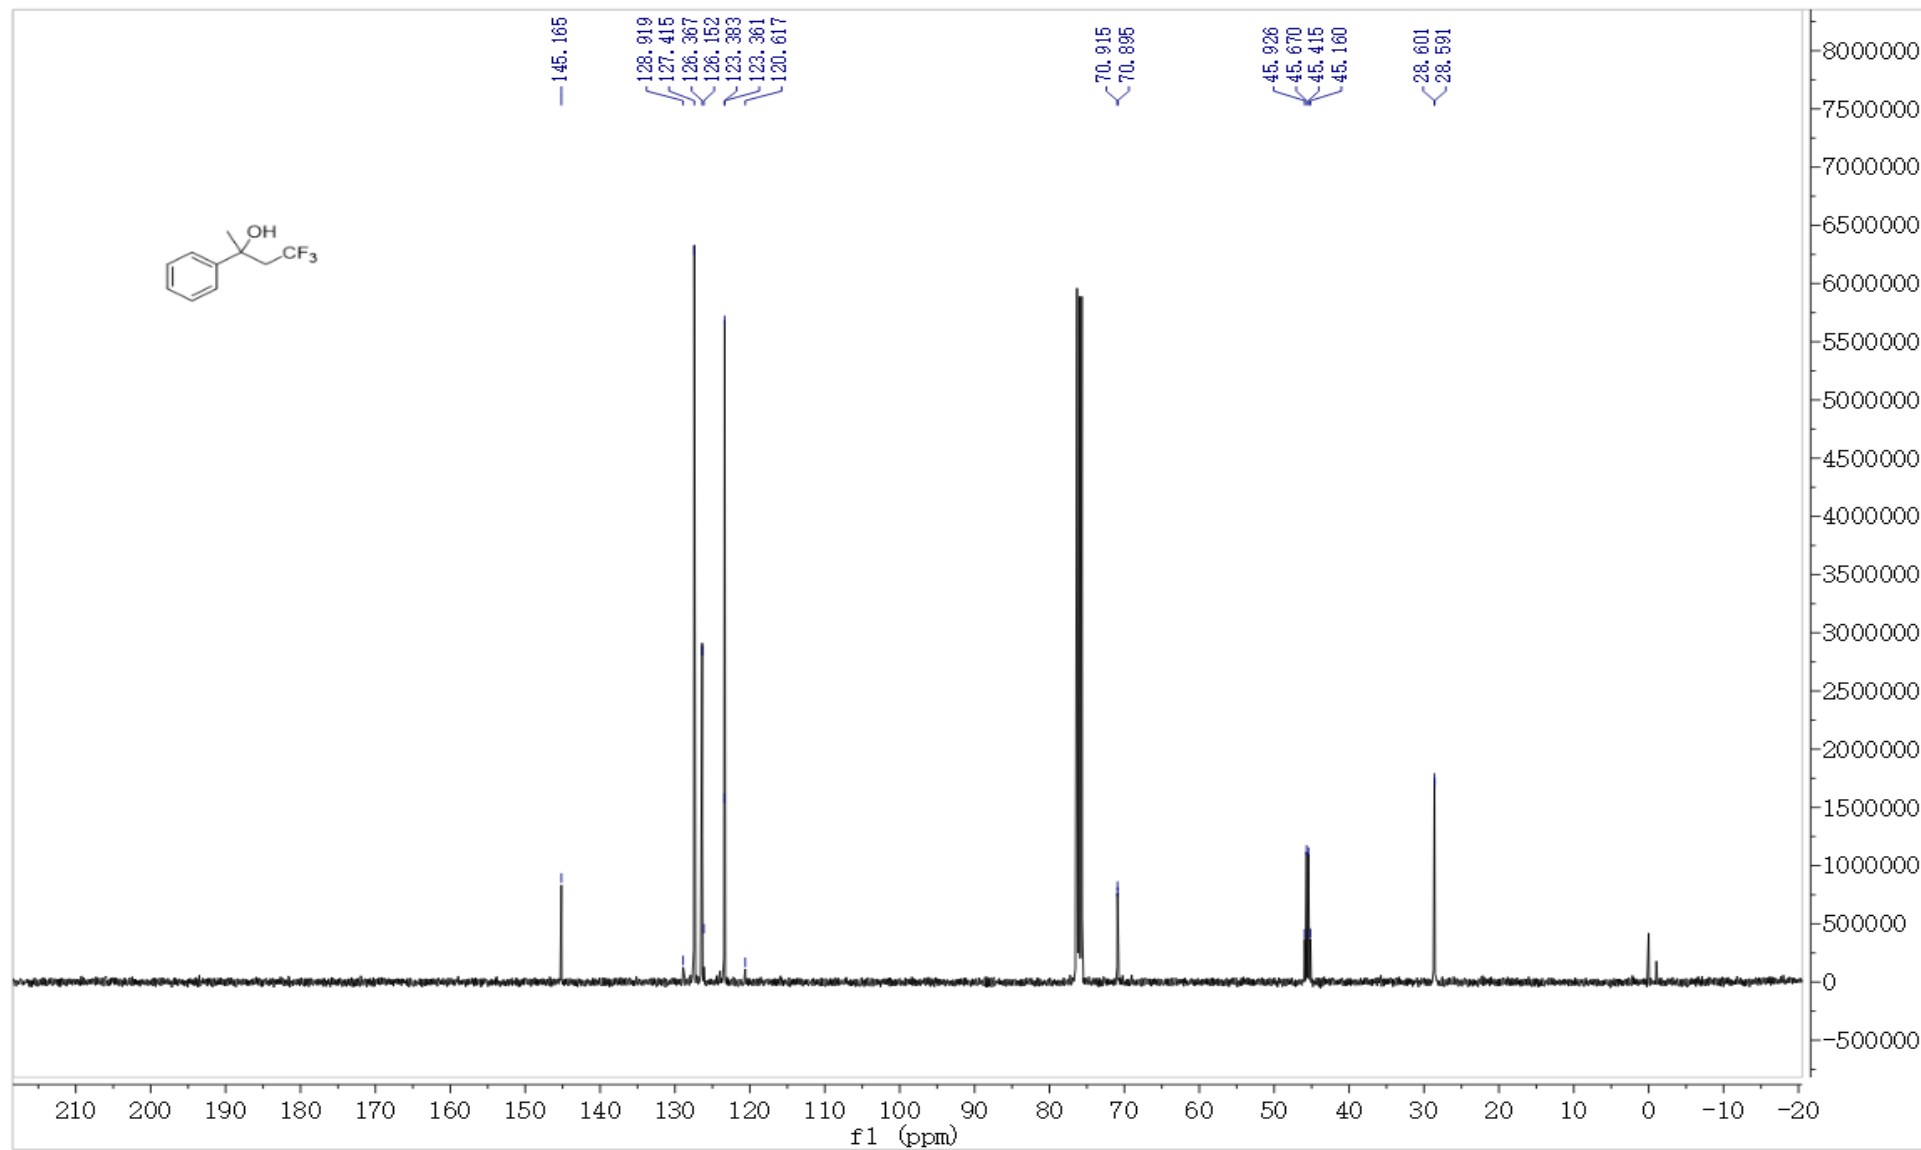



**<sup>19</sup>F NMR spectrum of 4a**

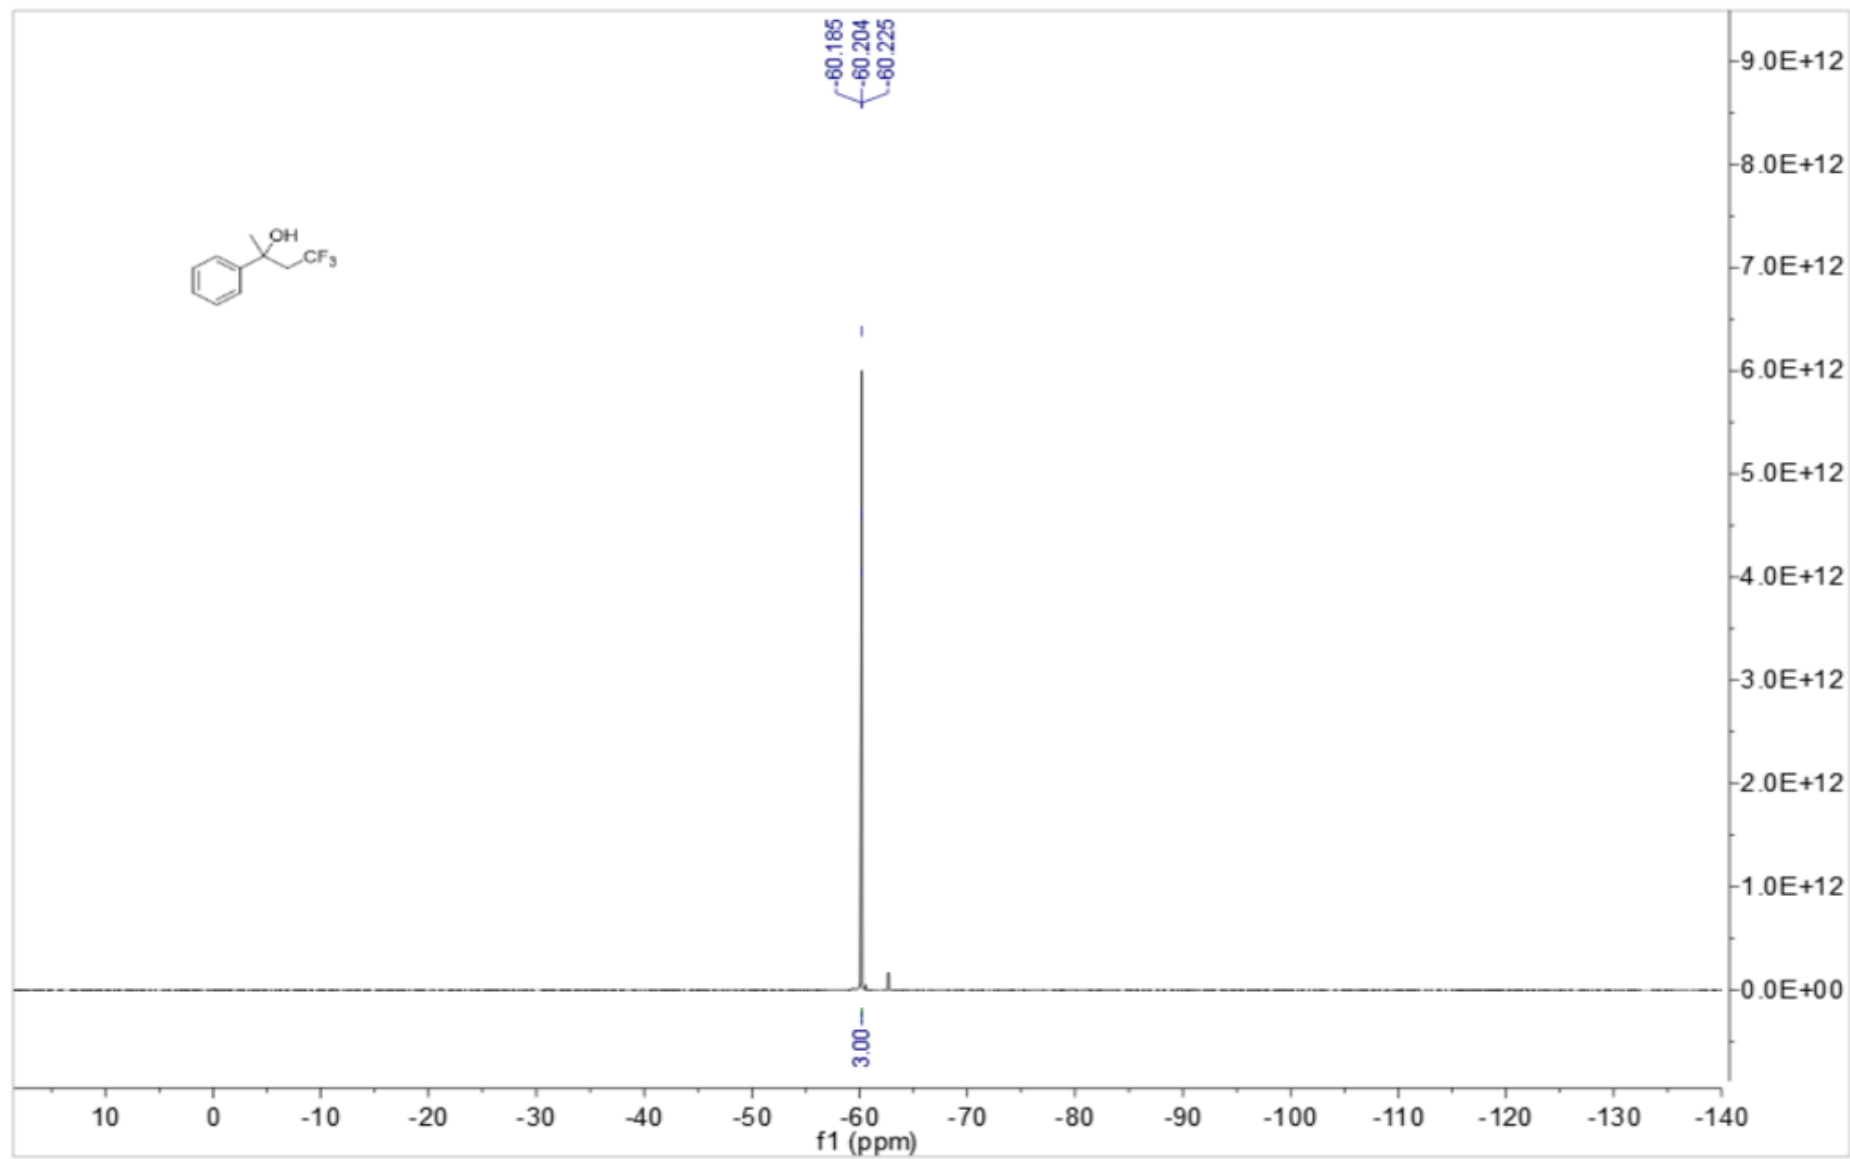

**<sup>1</sup>H NMR spectrum of 5a**

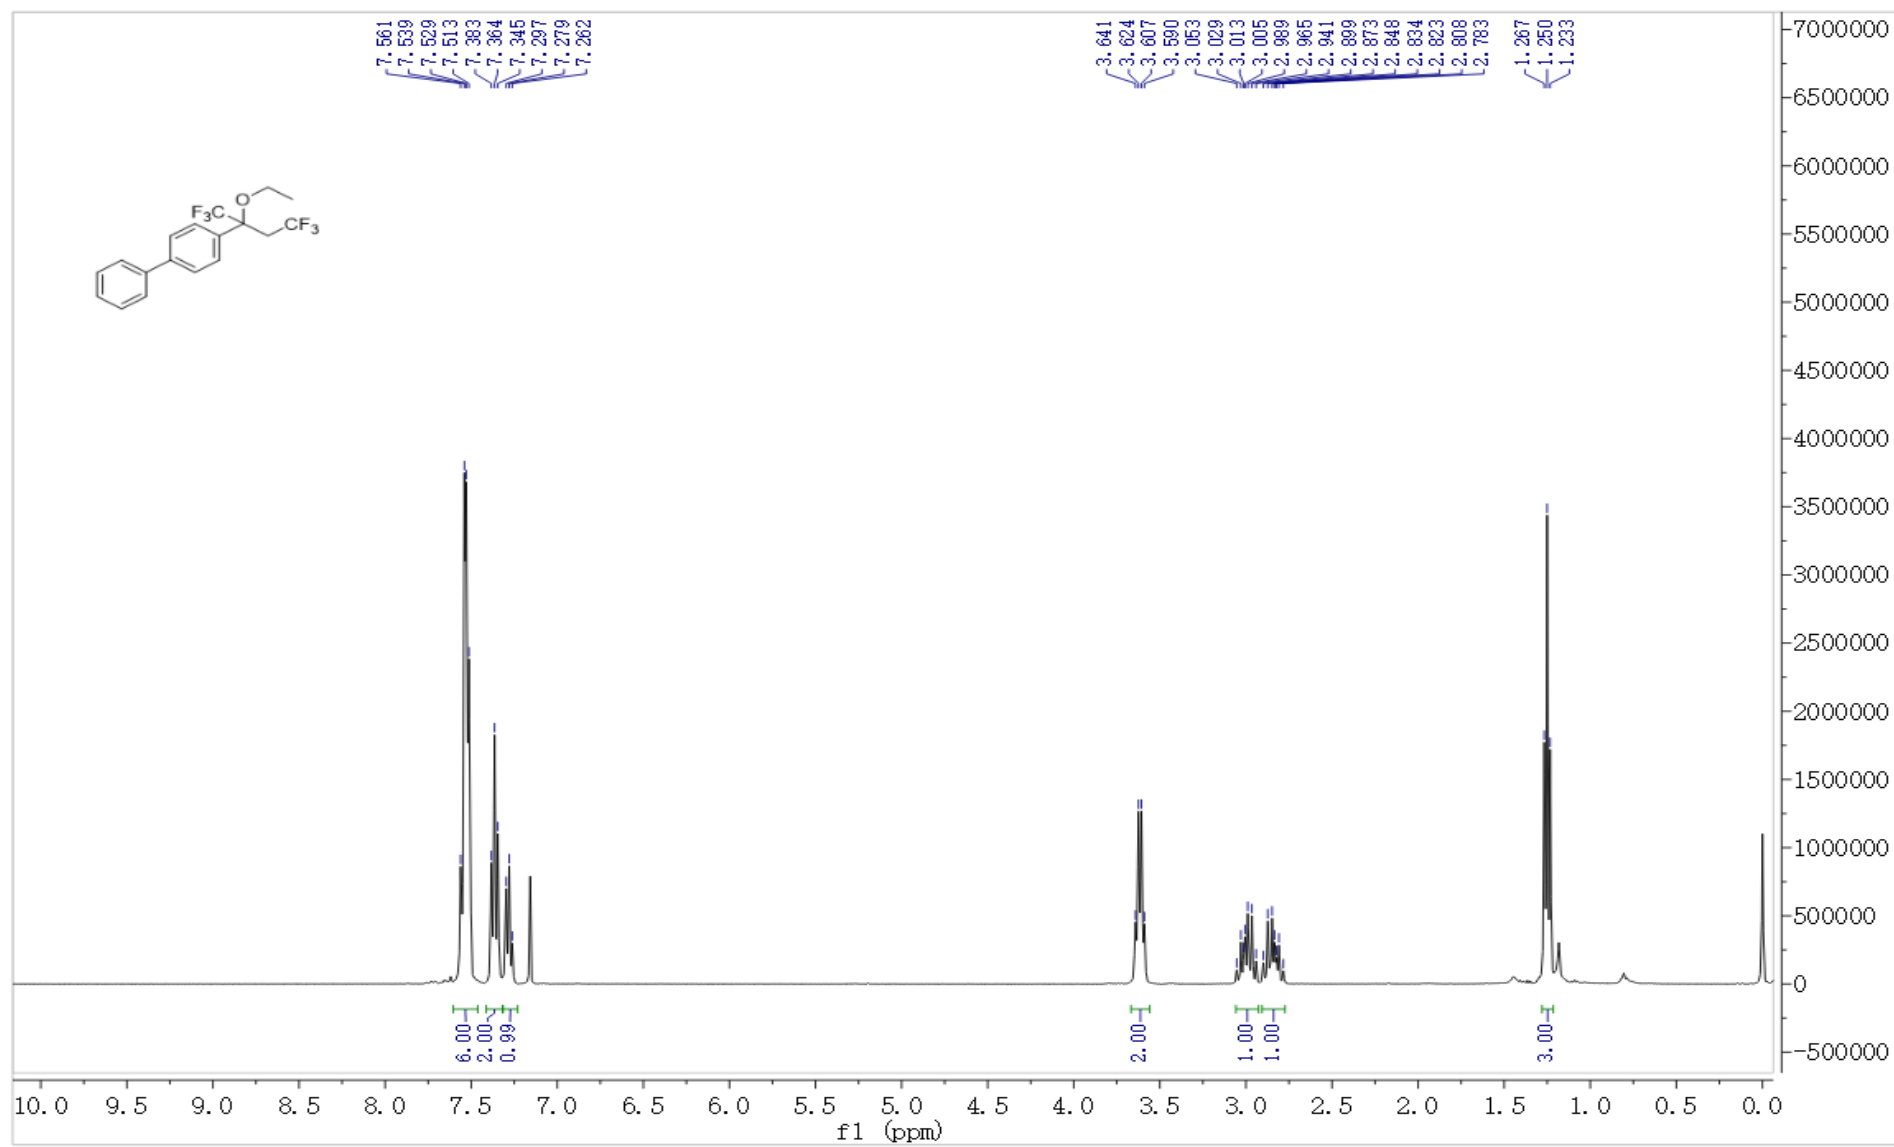

<sup>13</sup>C NMR spectrum of 5a

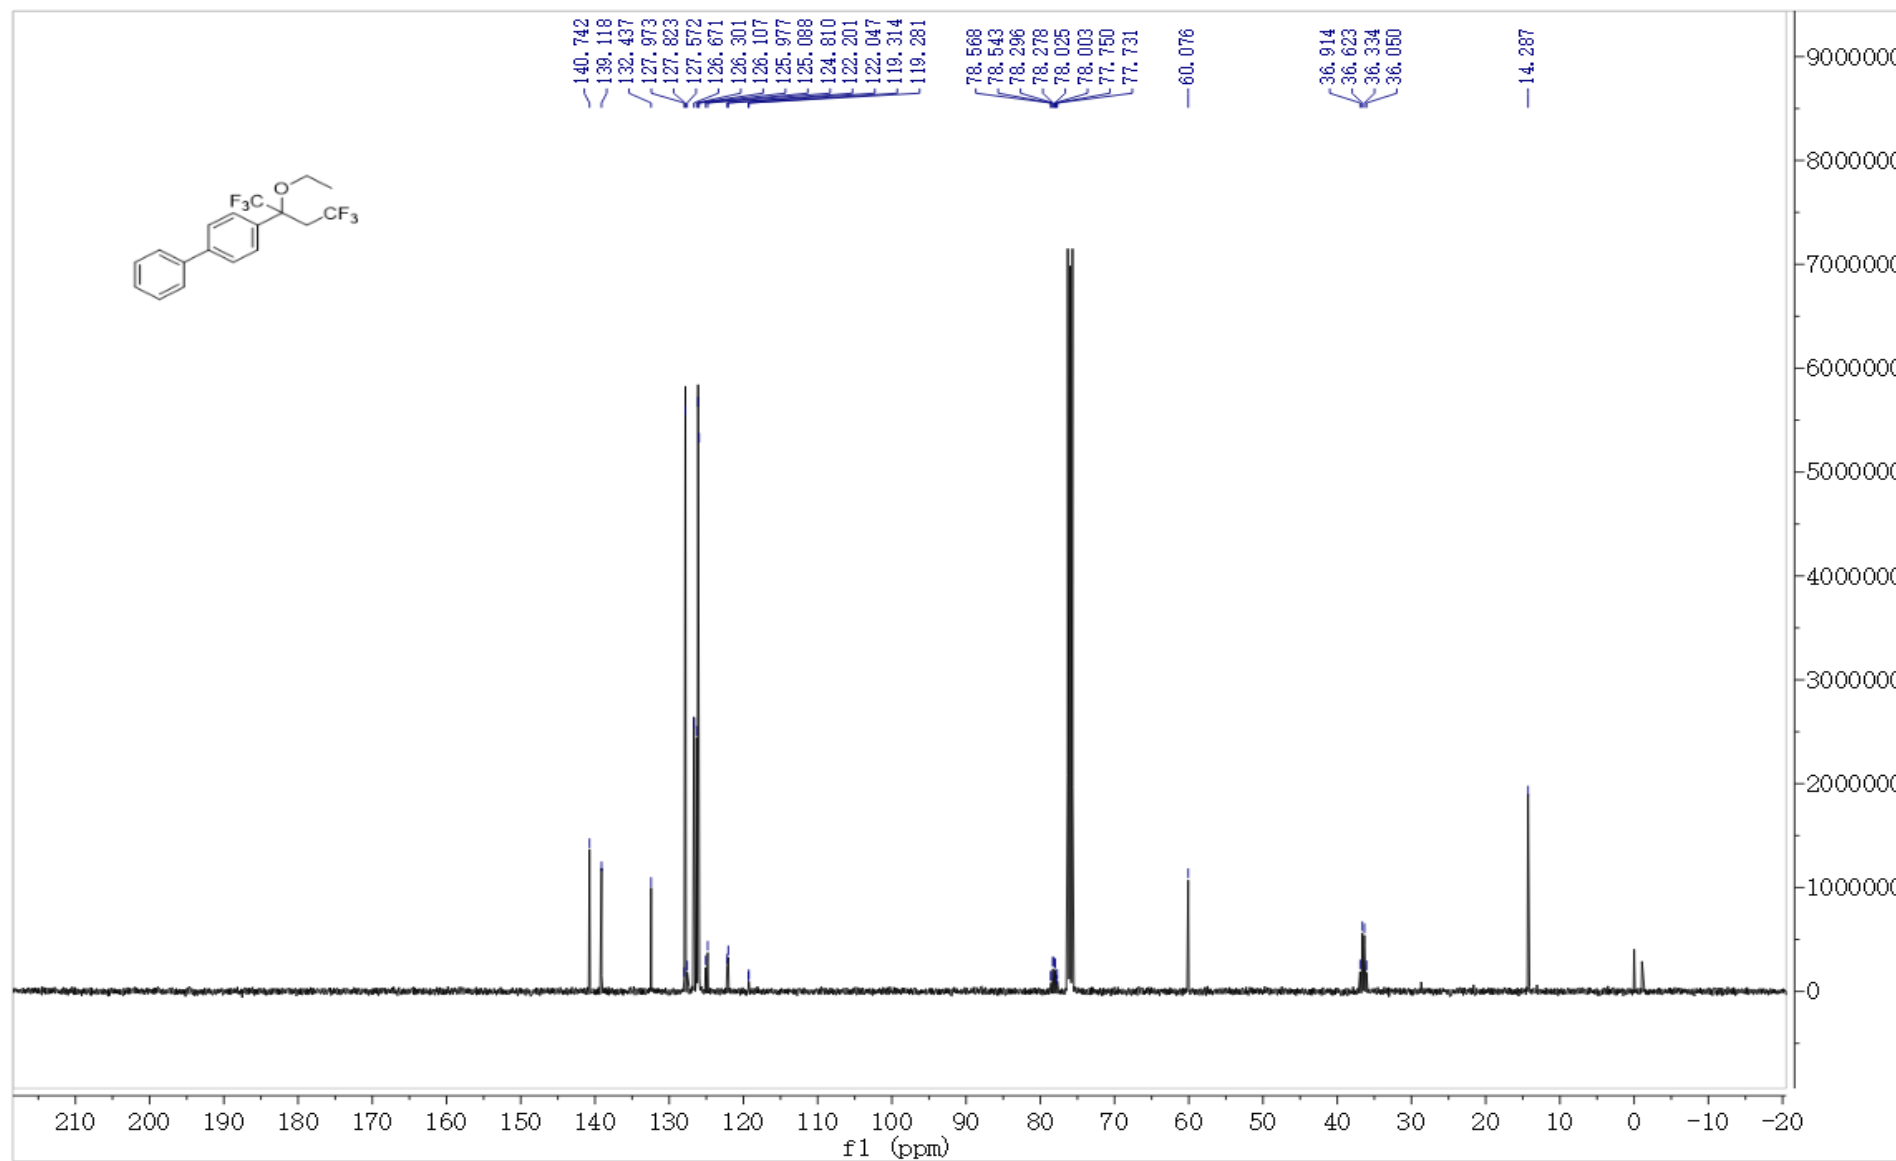

**<sup>19</sup>F NMR spectrum of 5a**

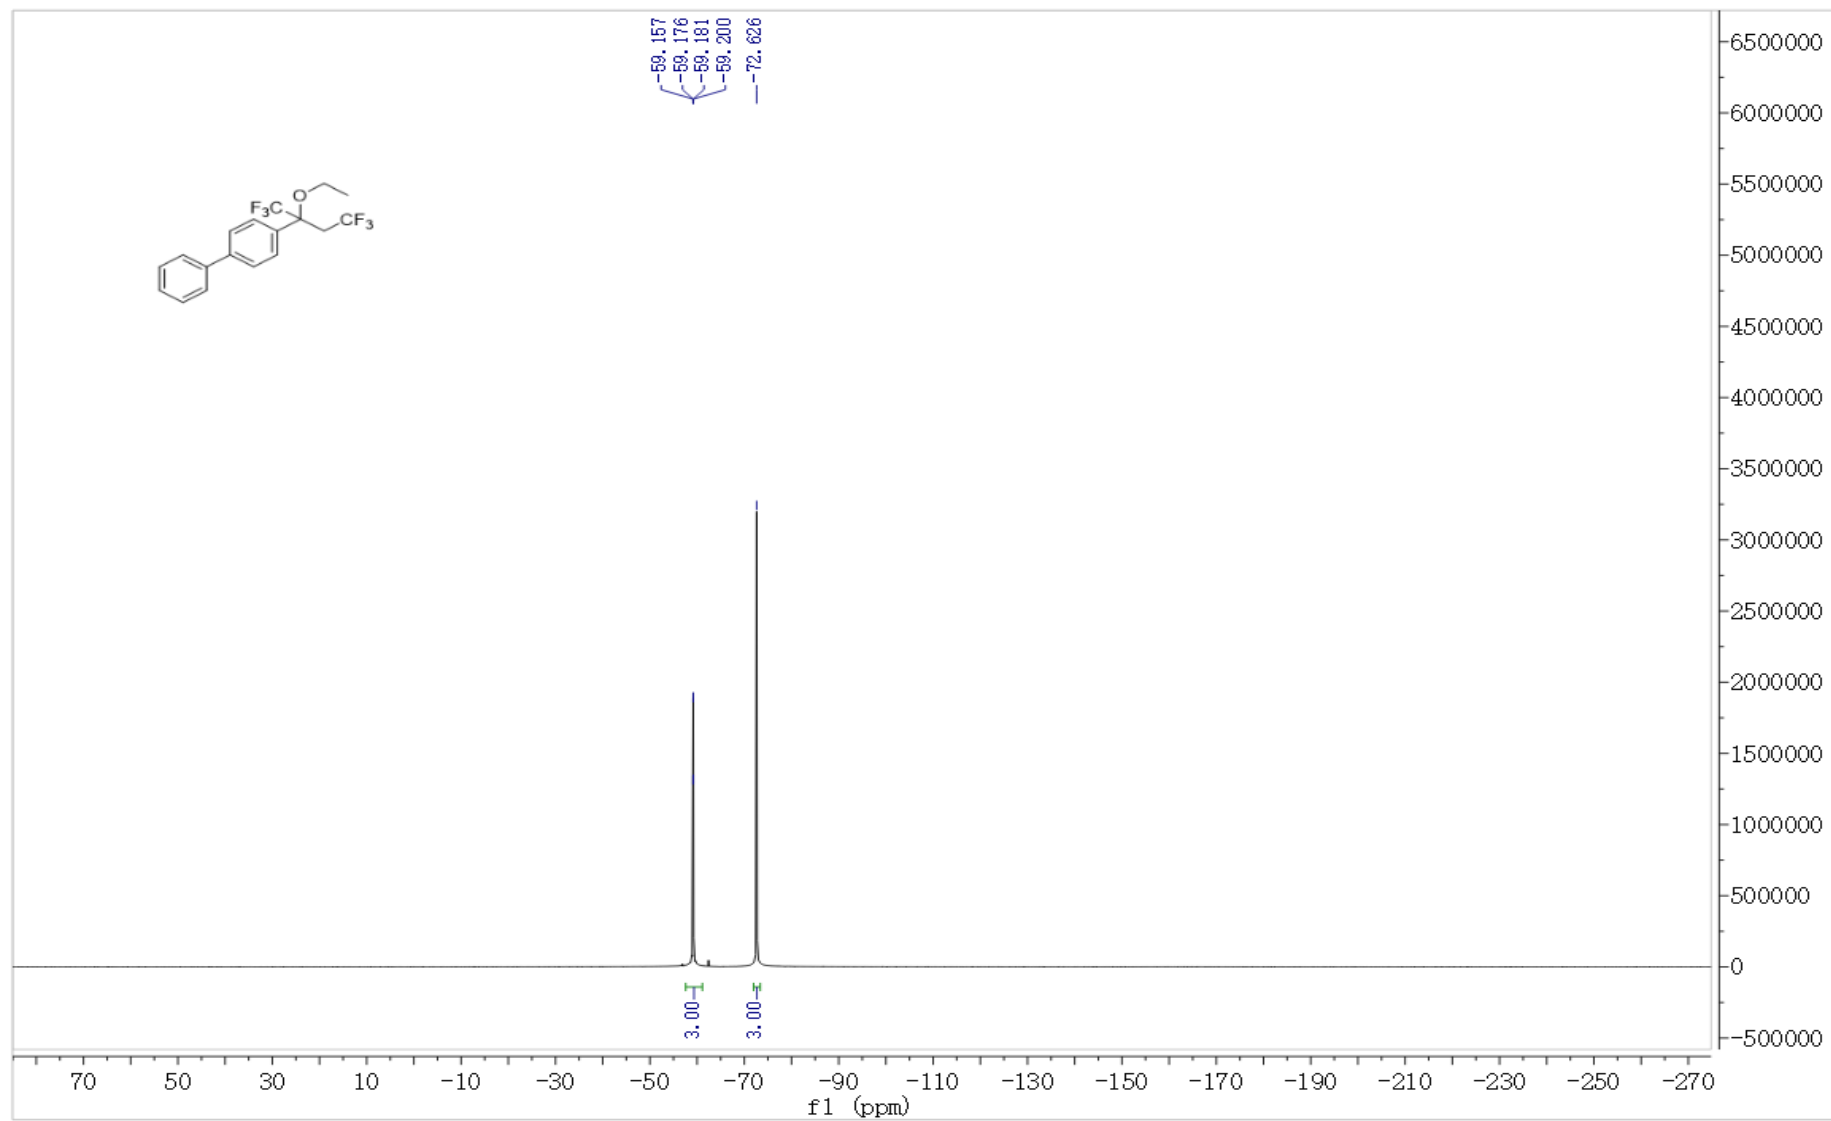

HRMS (EI) spectrum of 5a

CS-LC-P-362

Waters GCT Premier

20220311 171 (2.850) Cm (171-(33+41))

TOF MS EI+  
1.47e4

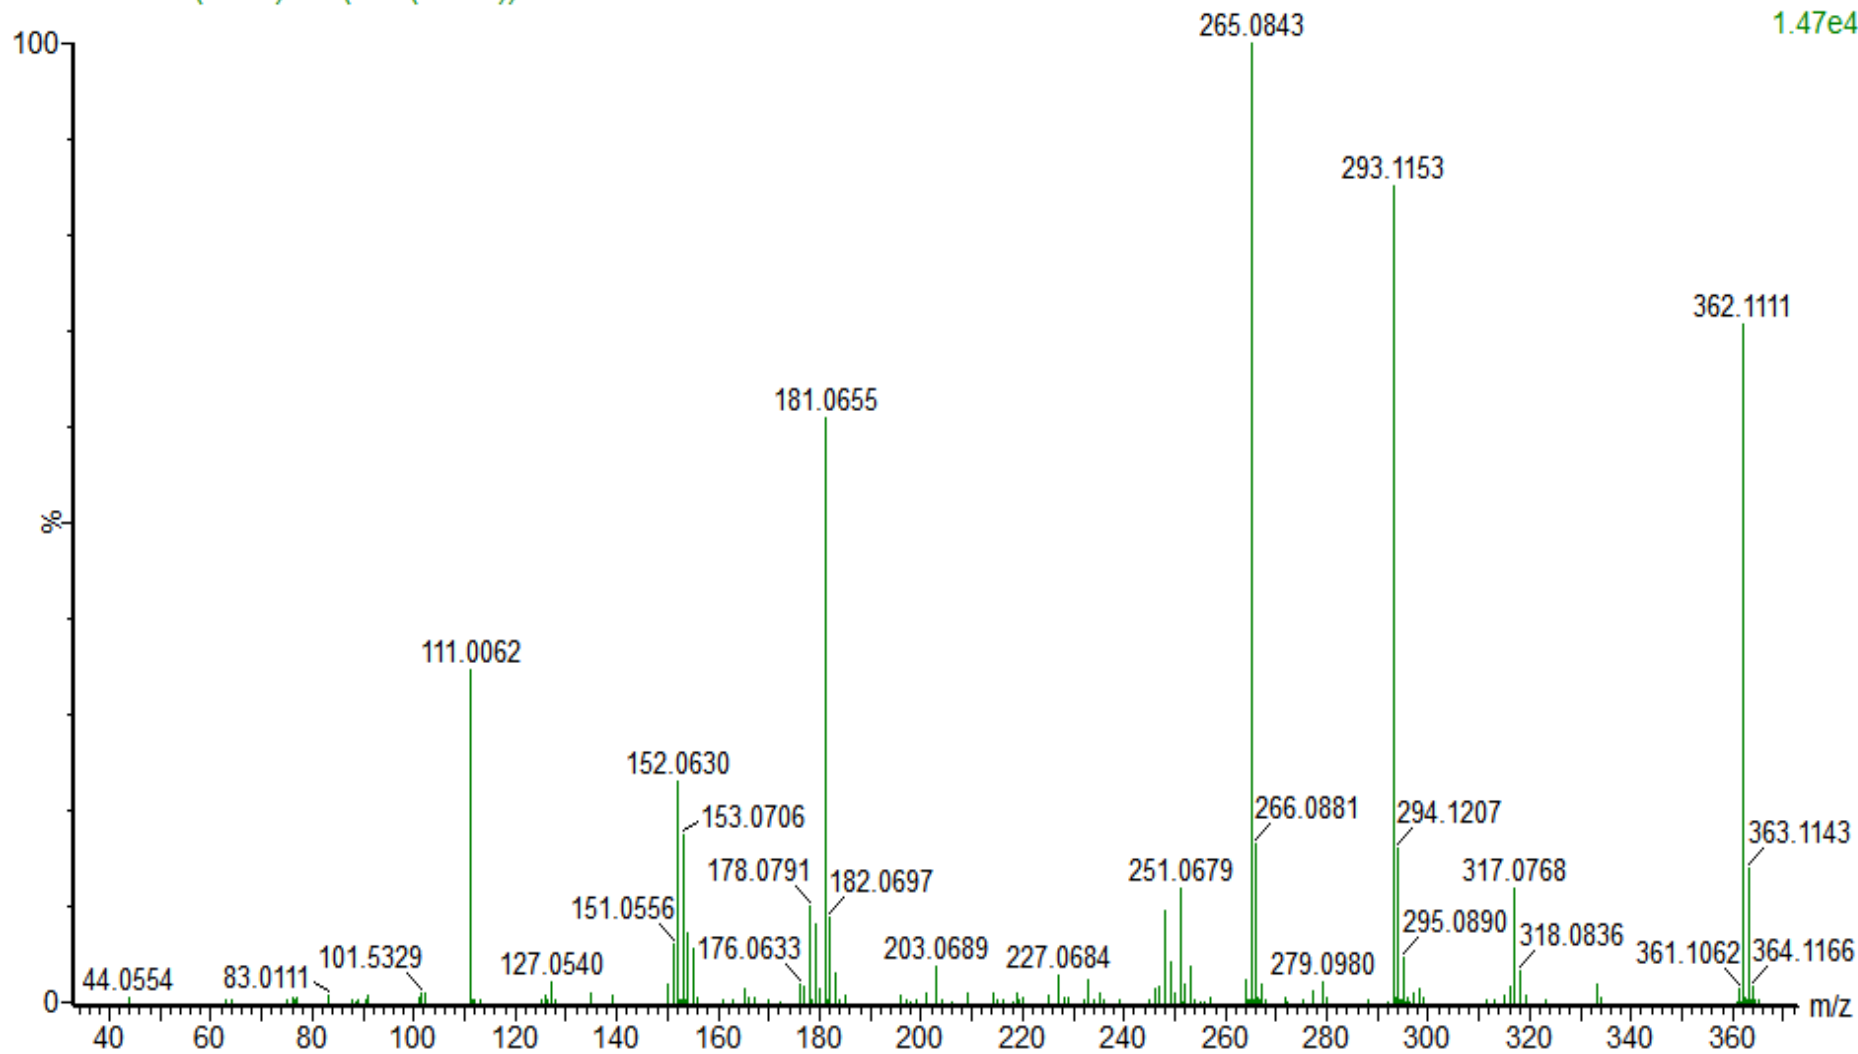

Supplement: d2ob02035a1.pdf [file d2ob02035a1.pdf]
